# Supplementary material
Source: publisher figshare collection journal article supplement (https://acs.figshare.com/ndownloader/files/16874159)
Supplement: Supplementary file 1 [file 16874159]

Supporting Information for:

## **Palladium-Catalyzed Hydrocarbonylative Cyclization of 1,5-Dienes**

Suchen Zou,<sup>†</sup> Bao Gao,<sup>†</sup> Yao Huang,<sup>†</sup> Tianze Zhang,<sup>†</sup> and Hanmin Huang<sup>\*,†,‡</sup>

<sup>†</sup> Hefei National Laboratory for Physical Sciences at the Microscale and Department of Chemistry,  
Center for Excellence in Molecular Synthesis, University of Science and Technology of China,  
Chinese Academy of Sciences, Hefei, 230026, P. R. China

<sup>‡</sup> State Key Laboratory of Applied Organic Chemistry, Lanzhou University, Lanzhou, 730000, P. R.  
China

\*E-mail: hanmin@ustc.edu.cn

## **CONTENTS**

- 1 General experimental details and materials**
- 2 Preparation and spectral data of 1,5-dienes**
- 3 Optimization of the reaction conditions**
- 4 General procedure for the catalytic reaction and spectral data of products**
- 5 Gram-scale synthesis of 2a**
- 6 Mechanistic studies**
- 7 References**
- 8 Copies of <sup>1</sup>H NMR, <sup>19</sup>F NMR and <sup>13</sup>C NMR of materials and products**

## 1. General experiment details and materials

**Experimental:** All non-aqueous reactions and manipulations were using standard Schlenk techniques. All solvents before use were dried and degassed by standard methods and stored under nitrogen atmosphere. All reactions were monitored by TLC with silica gel-coated plates. NMR spectra were recorded on BRUKER Avenice III 400 MHz spectrometers. Chemical shifts were reported in parts per million (ppm) down field from TMS with the solvent resonance as the internal standard. Coupling constants (*J*) were reported in Hz and referred to apparent peak multiplications. High resolution mass spectra (HRMS) were recorded on Bruker MicroTOF-QII mass (ESI). GC analysis were performed on Agilent 7890B with Hp-5 column. GC-MS analysis were performed with Agilent 7890B/5975B GC-MS system. Dienes were synthesized according to the reported methods.<sup>1</sup>

## 2. Preparation and spectral data of 1,5-dienes

### Method A: Synthesis of substrate 1a<sup>1a</sup>

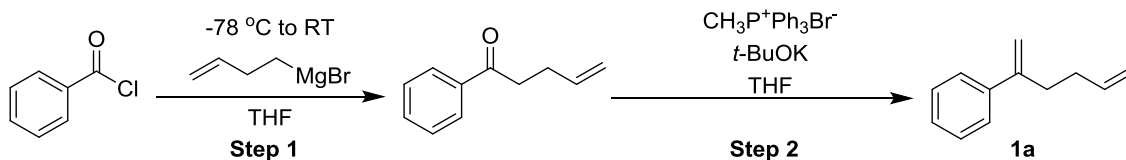

**Step 1:** To a mixture of the benzoyl chloride (4.6g, 33 mmol, 1.1 equiv) and CuI (279 mg, 1.5 mmol, 5mol%) in THF (45 mL) was added 0.5 M solution of 3-butenylmagnesium bromide in THF (60 mL, 30 mmol, 1.0 equiv.) at -78 °C dropwise. The reaction mixture was stirred at -78 °C for 1 hour and at room temperature overnight, before it was quenched by adding sat. aq. NH<sub>4</sub>Cl solution. Then the aqueous solution was extracted with diethyl ether three times. The combined organic phases were dried over MgSO<sub>4</sub>, filtered and removed in vacuo. The residue was purified by column chromatography on silica gel and eluted with petroleum ether/ethyl acetate (50/1) to afford 1-phenylpent-4-en-1-one (4.5 g, 94% yield).

**Step 2:** To a solution of methyltriphenylphosphonium bromide (25 mmol, 1.25 equiv.) in THF (80 mL) was added *t*-BuOK (24 mmol, 1.2 equiv.) at 0 °C and the resulting mixture was stirred for 30 minutes at 0 °C. Then the solution of 1-phenylpent-4-en-1-one (20 mmol, 1.0 equiv.) in THF (20 mL) was added to the reaction mixture dropwise at 0 °C. After 30 minutes, the ice bath was removed and the mixture was stirred overnight at room temperature, before it was quenched by adding sat. aq. NH<sub>4</sub>Cl solution. Then the aqueous solution was extracted with diethyl ether three times. The combined organic phases were dried over MgSO<sub>4</sub>, filtered and removed in vacuo. The residue was purified by column chromatography on silica gel and eluted with petroleum ether/ethyl acetate (100/1-50/1) to afford hexa-1,5-dien-2-ylbenzene **1a** (2.6 g, 82% yield).

Other compounds including **1b~1n**, and **1p**, **1t** were prepared by method A.

**Hexa-1,5-dien-2-ylbenzene (1a):** Known compound.<sup>1a</sup> The title compound was

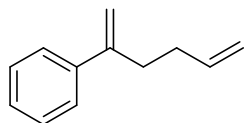

prepared according to the general procedure (Method A) and purified by column chromatography on silica gel and eluted with petroleum ether/ethyl acetate (100/1) to give the colorless oil (2.6

g, 82% yield). <sup>1</sup>H NMR (400 MHz, CDCl<sub>3</sub>) δ 2.19-2.24 (m, 2H), 2.59 (t, *J* = 7.6 Hz, 2H), 4.95-5.07 (m, 3H), 5.28 (s, 1H), 5.79-5.90 (m, 1H), 7.24-7.41 (m, 5H); <sup>13</sup>C NMR (100 MHz, CDCl<sub>3</sub>) δ 32.6, 34.9, 112.6, 114.9, 126.3, 127.5, 128.4, 138.3, 141.4, 148.1.

**1-(hexa-1,5-dien-2-yl)-4-methylbenzene (1b):** Known compound.<sup>2a</sup> The title

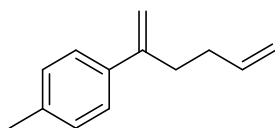

compound was prepared according to the general procedure (Method A) and purified by column chromatography on silica gel and eluted with petroleum ether/ethyl acetate (100/1) to

give the colorless oil (1.63 g, 41% yield). <sup>1</sup>H NMR (400 MHz, CDCl<sub>3</sub>) δ 2.18-2.23 (m, 2H), 2.33 (s, 3H), 2.57 (t, *J* = 7.6 Hz, 2H), 4.94-5.02 (m, 3H), 5.25 (d, *J* = 1.2 Hz, 1H), 5.78-5.88 (m, 1H), 7.11-7.13 (d, *J* = 8.0 Hz, 2H), 7.28-7.30 (d, *J* = 8.0 Hz, 2H); <sup>13</sup>C NMR (100 MHz, CDCl<sub>3</sub>) δ 21.2, 32.6, 34.9, 111.8, 114.8, 126.1, 129.1, 137.2, 138.4, 147.8.

**1-(hexa-1,5-dien-2-yl)-3-methylbenzene (1c):** The title compound was prepared

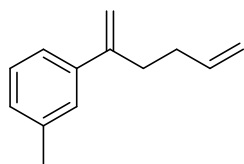

according to the general procedure (Method A) and purified by column chromatography on silica gel and eluted with petroleum ether/ethyl acetate (100/1) to give the colorless oil (1.3 g, 36% yield). <sup>1</sup>H NMR (400 MHz, CDCl<sub>3</sub>) δ 2.18 (m, 2H), 2.36 (s, 3H),

2.58 (t, *J* = 8.0 Hz, 2H), 4.96-5.05 (m, 3H), 5.26 (s, 1H), 5.80-5.90 (m, 1H), 7.08-7.09 (m, 1H), 7.19-7.24 (m, 3H); <sup>13</sup>C NMR (100 MHz, CDCl<sub>3</sub>) δ 21.7, 32.6, 34.9, 112.4, 114.8, 123.4, 127.0, 128.2, 128.3, 137.9, 138.4, 141.4, 148.2. HRMS (ESI) calcd. for C<sub>13</sub>H<sub>17</sub> [M+H]: 173.1330, found: 173.1333.

**1-(hexa-1,5-dien-2-yl)-2-methylbenzene (1d):** The title compound was prepared

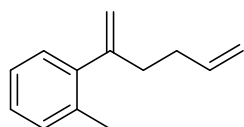

according to the general procedure (Method A) and purified by column chromatography on silica gel and eluted with petroleum ether/ethyl acetate (100/1) to give the colorless oil (4.3 g, 82% yield).

<sup>1</sup>H NMR (400 MHz, CDCl<sub>3</sub>) δ 2.12-2.17 (m, 2H), 2.29 (s, 3H), 2.42 (t, *J* = 7.6 Hz, 2H), 4.88-5.03 (m, 3H), 5.18 (m, 1H), 5.76-5.86 (m, 1H), 7.05-7.18 (m, 4H); <sup>13</sup>C NMR (100 MHz, CDCl<sub>3</sub>) δ 20.0, 32.1, 37.2, 114.2, 114.8, 125.5, 126.9, 128.5, 130.2, 135.0, 138.4, 143.0, 149.5. HRMS (ESI) calcd. for C<sub>13</sub>H<sub>17</sub> [M+H]: 173.1330, found: 173.1329.

**1-ethyl-4-(hexa-1,5-dien-2-yl)benzene (1e):** The title compound was prepared

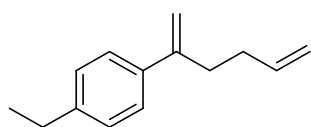

according to the general procedure (Method A) and purified by column chromatography on silica gel and eluted with petroleum ether/ethyl acetate (100/1) to give the colorless oil

(1.2 g, 33% yield). <sup>1</sup>H NMR (400 MHz, CDCl<sub>3</sub>) δ 1.23 (t, *J* = 7.6 Hz, 3H), 2.21 (q, *J* = 7.6 Hz, 2H), 2.57 (t, *J* = 7.6 Hz, 2H), 2.64 (q, *J* = 7.6 Hz, 2H), 4.94-5.02 (m, 3H), 5.26 (s, 1H), 5.79-5.89 (m, 1H), 7.15 (d, *J* = 8.0 Hz, 2H), 7.32 (d, *J* = 8.0 Hz, 2H); <sup>13</sup>C NMR (100 MHz, CDCl<sub>3</sub>) δ 15.7, 28.6, 32.6, 34.8, 111.9, 114.8, 126.2, 127.9, 138.4, 138.6, 143.6, 147.8. HRMS (ESI) calcd. for C<sub>14</sub>H<sub>19</sub> [M+H]: 187.1487, found: 187.1474.

**1-(tert-butyl)-4-(hexa-1,5-dien-2-yl)benzene (1f):** The title compound was prepared

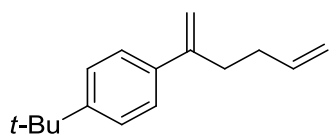

according to the general procedure (Method A) and purified by column chromatography on silica gel and eluted with petroleum ether/ethyl acetate (100/1) to give the colorless oil (2.3 g, 58% yield).  $^1\text{H NMR}$  (400 MHz,  $\text{CDCl}_3$ )  $\delta$  1.32 (s, 9H), 2.20-2.26 (m, 2H), 2.56-2.60 (m, 2H), 4.95-5.05 (m, 3H), 5.28 (d,  $J = 1.6$  Hz, 1H), 5.80-5.90 (m, 1H), 7.35 (m, 4H);  $^{13}\text{C NMR}$  (100 MHz,  $\text{CDCl}_3$ )  $\delta$  31.5, 32.7, 34.6, 34.7, 111.9, 114.8, 125.3, 125.8, 138.3, 138.4, 147.6, 150.5. **HRMS** (ESI) calcd. for  $\text{C}_{16}\text{H}_{23}$   $[\text{M}+\text{H}]$ : 215.1800, found: 215.1801.

**1-(hexa-1,5-dien-2-yl)-4-methoxybenzene (1g):** Known compound.<sup>2b</sup> The title

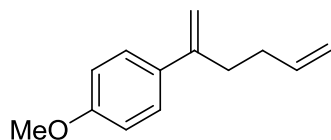

compound was prepared according to the general procedure (Method A) and purified by column chromatography on silica gel and eluted with petroleum ether/ethyl acetate (50/1) to give the colorless oil (1.7 g, 65% yield).  $^1\text{H NMR}$  (400 MHz,  $\text{CDCl}_3$ )  $\delta$  2.18-2.23 (m, 2H), 2.56 (t,  $J = 8.0$  Hz, 2H), 3.79 (s, 3H), 4.94-5.03 (m, 3H), 5.21 (d,  $J = 1.2$  Hz, 1H), 5.79-5.89 (m, 1H), 6.84-6.87 (m, 2H), 7.32-7.36 (m, 2H);  $^{13}\text{C NMR}$  (100 MHz,  $\text{CDCl}_3$ )  $\delta$  32.6, 34.9, 55.3, 111.0, 113.7, 114.8, 127.3, 133.7, 138.3, 147.3, 159.1.

**1-fluoro-4-(hexa-1,5-dien-2-yl)benzene (1h):** Known compound.<sup>2b</sup> The title

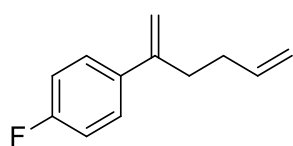

compound was prepared according to the general procedure (Method A) and purified by column chromatography on silica gel and eluted with petroleum ether/ethyl acetate (100/1) to give the colorless oil (0.9 g, 48% yield).  $^1\text{H NMR}$  (400 MHz,  $\text{CDCl}_3$ )  $\delta$  2.16-2.22 (m, 2H), 2.56 (t,  $J = 8.4$  Hz, 2H), 4.95-5.02 (m, 2H), 5.05 (d,  $J = 1.2$  Hz, 1H), 5.22 (s, 1H), 5.77-5.87 (m, 1H), 6.98-7.02 (m, 2H), 7.33-7.37 (m, 2H);  $^{13}\text{C NMR}$  (100 MHz,  $\text{CDCl}_3$ )  $\delta$  32.5, 35.0, 112.6, 115.0, 115.3 (d,  $J_{\text{C-F}} = 20.0$  Hz), 127.9 (d,  $J_{\text{C-F}} = 10.0$  Hz), 137.4 (d,  $J_{\text{C-F}} = 10.0$  Hz), 138.1, 147.0, 161.2, 163.6 (d,  $J_{\text{C-F}} = 240.0$  Hz);  $^{19}\text{F NMR}$  (376 MHz,  $\text{CDCl}_3$ )  $\delta$  -115.3.

**1-chloro-4-(hexa-1,5-dien-2-yl)benzene (1i):** Known compound.<sup>2b</sup> The title

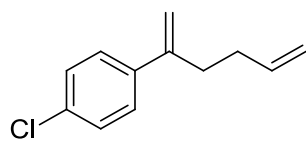

compound was prepared according to the general procedure (Method A) and purified by column chromatography on silica gel and eluted with petroleum ether/ethyl acetate (100/1) to give the colorless oil (1.95 g, 43% yield). <sup>1</sup>H NMR (400 MHz, CDCl<sub>3</sub>) δ 2.16-2.22 (m, 2H), 2.56 (t, *J* = 8.0 Hz, 2H), 4.95-5.02 (m, 2H), 5.08 (d, *J* = 1.2 Hz, 1H), 5.27 (s, 1H), 5.76-5.87 (m, 1H), 7.27-7.33 (m, 4H); <sup>13</sup>C NMR (100 MHz, CDCl<sub>3</sub>) δ 32.5, 34.8, 113.1, 115.0, 127.6, 128.5, 133.3, 138.0, 139.8, 146.9.

**1-bromo-4-(hexa-1,5-dien-2-yl)benzene (1j):** Known compound.<sup>2c</sup> The title

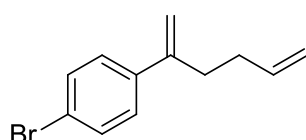

compound was prepared according to the general procedure (Method A) and purified by column chromatography on silica gel and eluted with petroleum ether/ethyl acetate (100/1) to give the colorless oil (2.5 g, 58% yield). <sup>1</sup>H NMR (400 MHz, CDCl<sub>3</sub>) δ 2.15-2.21 (m, 2H), 2.52-2.56 (m, 2H), 4.94-5.02 (m, 2H), 5.07-5.08 (m, 1H), 5.25-5.26 (m, 1H), 5.75-5.85 (m, 1H), 7.22-7.26 (m, 2H), 7.41-7.44 (m, 2H); <sup>13</sup>C NMR (100 MHz, CDCl<sub>3</sub>) δ 32.4, 34.7, 113.2, 115.1, 121.4, 127.9, 131.5, 138.0, 140.2, 146.9.

**4-(hexa-1,5-dien-2-yl)-1,1'-biphenyl (1k):** Known compound.<sup>2b</sup> The title compound

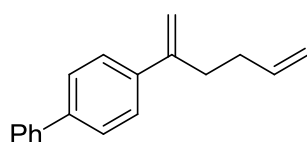

was prepared according to the general procedure (Method A) and purified by column chromatography on silica gel and eluted with petroleum ether/ethyl acetate (100/1) to give the a white solid (2.3 g, 60% yield). <sup>1</sup>H NMR (400 MHz, CDCl<sub>3</sub>) δ 2.23-2.28 (m, 2H), 2.61-2.65 (m, 2H), 4.96-5.05 (m, 2H), 2.61-2.65 (m, 2H), 5.10 (d, *J* = 1.2 Hz, 1H), 5.35 (d, *J* = 1.2 Hz, 1H), 5.81-5.91 (m, 1H), 7.32-7.36 (m, 1H), 7.41-7.49 (m, 4H), 7.55-7.61 (m, 4H); <sup>13</sup>C NMR (100 MHz, CDCl<sub>3</sub>) δ 32.6, 34.8, 112.6, 114.9, 126.6, 127.1, 127.1, 127.4, 128.9, 138.3, 140.2, 140.3, 140.9, 147.5.

**1-(hexa-1,5-dien-2-yl)-4-(trifluoromethyl)benzene (1l):** Known compound.<sup>2d</sup> The

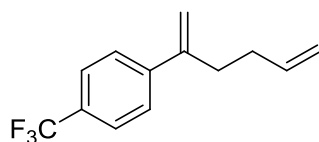

title compound was prepared according to the general procedure (Method A) and purified by column

chromatography on silica gel and eluted with petroleum ether/ethyl acetate (50/1) to give the colorless oil (4.0 g, 75% yield). **<sup>1</sup>H NMR** (400 MHz, CDCl<sub>3</sub>) δ 2.17-2.22 (m, 2H), 2.60 (t, *J* = 7.6 Hz, 2H), 4.96-5.02 (m, 2H), 5.16 (d, *J* = 1.2 Hz, 1H), 5.33 (s, 1H), 5.76-5.87 (m, 1H), 7.47 (d, *J* = 8.0 Hz, 2H), 7.57 (d, *J* = 8.2 Hz, 2H); **<sup>13</sup>C NMR** (100 MHz, CDCl<sub>3</sub>) δ 32.4, 34.7, 114.6, 115.2, 123.0, 125.4 (q, *J*<sub>C-F</sub> = 4.0 Hz), 126.6, 129.5 (q, *J*<sub>C-F</sub> = 32.0 Hz), 137.8, 145.0, 147.0; **<sup>19</sup>F NMR** (376 MHz, CDCl<sub>3</sub>) δ -62.5.

**4-(hexa-1,5-dien-2-yl)benzonitrile (1m):** The title compound was prepared according

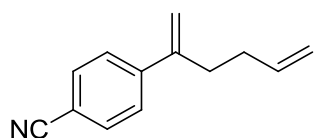

to the general procedure (Method A) and purified by column chromatography on silica gel and eluted with petroleum ether/ethyl acetate (50/1) to give the colorless oil (3.8 g,

97% yield). **<sup>1</sup>H NMR** (400 MHz, CDCl<sub>3</sub>) δ 2.17-2.23 (m, 2H), 2.57-2.61 (m, 2H), 4.96-5.03 (m, 2H), 5.22 (d, *J* = 1.2 Hz, 1H), 5.38 (s, 1H), 5.76-5.86 (m, 1H), 7.47-7.50 (m, 2H), 7.61-7.63 (m, 2H); **<sup>13</sup>C NMR** (100 MHz, CDCl<sub>3</sub>) δ 32.3, 34.3, 111.0, 115.3, 115.5, 119.0, 126.9, 132.3, 137.5, 145.9, 146.5. **HRMS** (ESI) calcd. for C<sub>13</sub>H<sub>14</sub>N [M+H]: 184.1126, found: 184.1122.

**methyl 4-(hexa-1,5-dien-2-yl)benzoate (1n):** The title compound was prepared

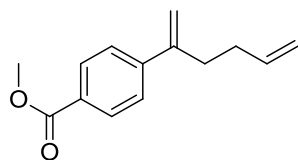

according to the general procedure (Method A) and purified by column chromatography on silica gel and eluted with petroleum ether/ethyl acetate (50/1) to give the colorless oil

(3.8 g, 84% yield). **<sup>1</sup>H NMR** (400 MHz, CDCl<sub>3</sub>) δ 2.07-2.12 (m, 2H), 2.47-2.51 (m, 2H), 3.80 (s, 3H), 4.85-4.91 (m, 2H), 5.05 (d, *J* = 1.2 Hz, 1H), 5.26 (s, 1H), 5.66-5.76 (m, 1H), 7.34 (d, *J* = 8.4 Hz, 2H), 7.89 (d, *J* = 8.4 Hz, 2H); **<sup>13</sup>C NMR** (100 MHz, CDCl<sub>3</sub>) δ 32.3, 34.5, 52.1, 114.4, 115.0, 126.1, 129.0, 129.7, 137.8, 145.8, 147.1, 166.9. **HRMS** (ESI) calcd. for C<sub>14</sub>H<sub>17</sub>O<sub>2</sub> [M+H]: 217.1229, found: 217.1227.

**1-(hexa-1,5-dien-2-yl)naphthalene (1p):** The title compound was prepared according

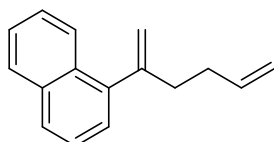

to the general procedure (Method A) and purified by column chromatography on silica gel and eluted with petroleum ether/ethyl acetate (50/1) to give the colorless oil (3.8 g, 84%

yield). **<sup>1</sup>H NMR** (400 MHz, CDCl<sub>3</sub>) δ 2.14-2.20 (m, 2H), 2.60 (t, *J* = 8.0 Hz, 2H), 4.93-5.01 (m, 2H), 5.09 (s, 1H), 5.40 (t, *J* = 1.2 Hz, 1H), 5.76-5.87 (m, 1H), 7.25-7.27 (m, 1H), 7.38-7.46 (m, 3H), 7.73 (d, *J* = 8.0 Hz, 1H), 7.81-7.83 (m, 3H), 8.01-8.04 (m, 1H); **<sup>13</sup>C NMR** (100 MHz, CDCl<sub>3</sub>) δ 32.4, 38.0, 115.0, 125.2, 125.3, 125.8, 125.9, 125.9, 127.3, 128.4, 131.4, 133.8, 138.2, 141.3, 148.3. **HRMS** (ESI) calcd. for C<sub>16</sub>H<sub>17</sub> [M+H]: 209.1330, found: 209.1323.

**(1S,3s)-1-(hexa-1,5-dien-2-yl)adamantane (1t):** The title compound was prepared

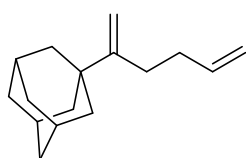

according to the general procedure (Method A) and purified by column chromatography on silica gel and eluted with petroleum ether/ethyl acetate (100/1) to give the colorless oil (1.6 g, 48%

yield). **<sup>1</sup>H NMR** (400 MHz, CDCl<sub>3</sub>) δ 1.64-1.73 (m, 12H), 2.00 (s, 3H), 2.07-2.11 (m, 2H), 2.16-2.22 (m, 2H), 4.71 (d, *J* = 1.2 Hz, 1H), 4.81 (s, 1H), 4.92-5.05 (m, 2H), 5.79-5.89 (m, 1H); **<sup>13</sup>C NMR** (100 MHz, CDCl<sub>3</sub>) δ 28.8, 29.6, 33.8, 37.1, 38.0, 41.2, 106.4, 114.4, 139.2, 158.1. **HRMS** (ESI) calcd. for C<sub>16</sub>H<sub>25</sub> [M+H]: 217.1956, found: 217.1960.

#### Method B: Synthesis of substrate 1o<sup>1b</sup>

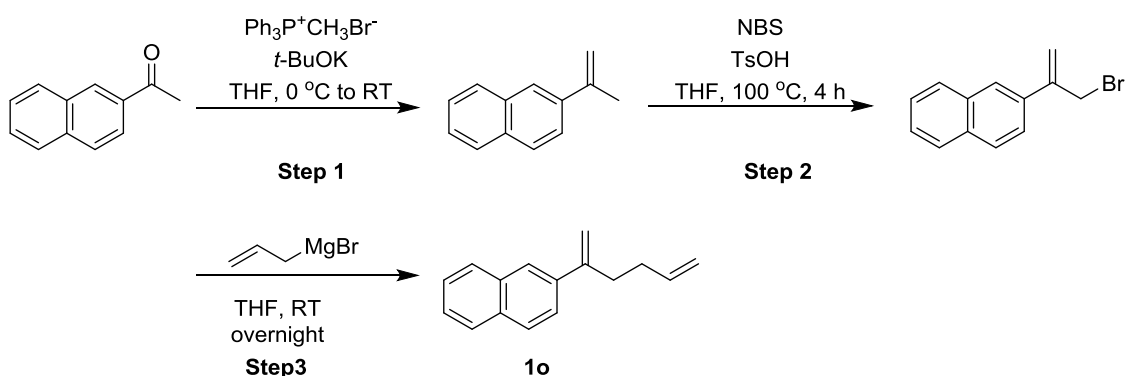

**Step 1:** In an oven dried flask, methyl triphenylphosphonium bromide (1.2 equiv.) was taken and THF (1.6 mL/mmol) was added. The suspension was cooled to 0 °C, *t*-BuOK (1.2 equiv.) was added and the resulting yellow suspension was stirred at 0 °C for 30 minutes. To this suspension, a solution of ketone (1.0 equiv.) in THF (0.7 mL/mmol) was added dropwise and the resulting mixture was warmed gradually to



room temperature and stirred overnight. Reaction mixture was concentrated under reduced pressure and filtered over celite. The filtrate was concentrated under reduced pressure to yield yellow oil. The crude product was purified by column chromatography on silica gel and eluted with petroleum ether/ethyl acetate (100/1) to afford 2-(prop-1-en-2-yl)naphthalene (4.6 g, 89%).

**Step 2:** In an oven dried flask 2-(prop-1-en-2-yl)naphthalene (1.0 equiv.) was taken and to this dry THF (3.0 mL/mmol) was added. To the resulting solution N-Bromosuccinimide (1.05 equiv.) and TsOH (0.1 equiv.) was added and the solution was refluxed at 100 °C for 4 hours. Reaction mixture was cooled to room temperature and the reaction mixture was taken in petroleum ether (15 mL/mmol), washed with H<sub>2</sub>O (15 mL × 3). Organic phase was dried over MgSO<sub>4</sub>, concentrated under reduced pressure to obtain a yellow oil. The crude product was purified by column chromatography on silica gel and eluted with petroleum ether/ethyl acetate (100/1) to afford 2-(3-bromoprop-1-en-2-yl)naphthalene (3.2 g, 48%).

**Step 3:** To a solution of the 2-(3-bromoprop-1-en-2-yl)naphthalene (5 mmol, 1.0 equiv.) in THF (20 mL) was added 1 M solution of 3-butenylmagnesium bromide in diethyl ether (7.5 mL, 7.5 mmol, 1.5 equiv.) at room temperature. The reaction mixture was stirred at room temperature overnight, before it was quenched by adding sat. aq. NH<sub>4</sub>Cl solution. Then the aqueous solution was extracted with diethyl ether three times. The combined organic phases were washed with sat. aq. NaHCO<sub>3</sub> solution and brine, dried over MgSO<sub>4</sub>, filtered and removed in vacuo. The residue was purified by column chromatography on silica gel and eluted with petroleum ether/ethyl acetate (100/1) to afford 2-(hexa-1,5-dien-2-yl)naphthalene **1o** as a colorless oil (1.2 g, 44%).

**2-(hexa-1,5-dien-2-yl)naphthalene (1o):** Known compound.<sup>2b</sup> The title compound

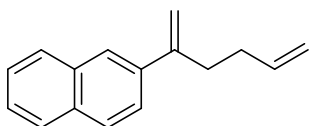

was prepared according to the general procedure (Method **B**) and purified by column chromatography to give the colorless oil (1.2 g, 44%). <sup>1</sup>H NMR (400 MHz, CDCl<sub>3</sub>) δ 2.14-2.20 (m,

2H), 2.60 (t, *J* = 8.0 Hz, 2H), 4.93-5.02 (m, 2H), 5.09 (d, *J* = 2.0 Hz, 1H), 5.41 (m, 1H), 5.77-5.87 (m, 1H), 7.26-7.28 (m, 2H), 7.39-7.47 (m, 3H), 7.74 (d, *J* = 8.0 Hz, 1H),

7.81-7.85 (m, 1H), 8.00-8.03 (m, 1H);  $^{13}\text{C}$  NMR (100 MHz,  $\text{CDCl}_3$ )  $\delta$  32.4, 38.0, 115.0, 115.7, 125.2, 125.3, 125.8, 125.9, 125.9, 127.3, 128.4, 131.4, 133.8, 138.3, 141.3, 148.3.

### Procedure C: Synthesis of substrate 1q

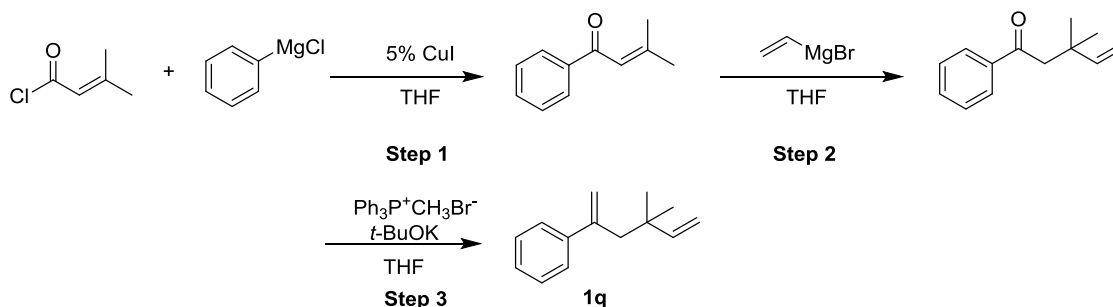

**Step 1:** To a mixture of the 3-methylbut-2-enoyl chloride (55 mmol, 1.1 equiv.) and CuI (465 mg, 2.5 mmol, 5 mol%) in THF (90 mL) was added 1 M solution of phenylmagnesium chloride in THF (50 mL, 50 mmol, 1.0 equiv.) at  $-78^\circ\text{C}$  dropwise. The reaction mixture was stirred at  $-78^\circ\text{C}$  for 1 hour and at room temperature overnight, before it was quenched by adding sat. aq.  $\text{NH}_4\text{Cl}$  solution. Then the aqueous solution was extracted with diethyl ether three times. The combined organic phases were dried over  $\text{MgSO}_4$ , filtered and removed in vacuo. The residue was purified by column chromatography on silica gel and eluted with petroleum ether/ethyl acetate (50/1) to afford 3-methyl-1-phenylbut-2-en-1-one (5.0 g, 63% yield).

**Step 2:** To a solution of the 3-methyl-1-phenylbut-2-en-1-one (30 mmol, 1.0 equiv.) in THF (60 mL) was added 1 M solution of vinylmagnesium bromide in THF (45 mL, 45 mmol, 1.5 equiv.) at room temperature. The reaction mixture was stirred at room temperature overnight, before it was quenched by adding sat. aq.  $\text{NH}_4\text{Cl}$  solution. Then the aqueous solution was extracted with diethyl ether three times. The combined organic phases were washed with sat. aq.  $\text{NaHCO}_3$  solution and brine, dried over  $\text{MgSO}_4$ , filtered and removed in vacuo. The residue was purified by column chromatography on silica gel and eluted with petroleum ether/ethyl acetate (50/1) to afford 3,3-dimethyl-1-phenylpent-4-en-1-one as a colorless oil (4.0 g, 70%).

**Step 3:** To a solution of methyltriphenylphosphonium bromide (25 mmol, 1.25 equiv.) in THF (80 mL) was added *t*-BuOK (24 mmol, 1.2 equiv.) at 0 °C and the resulting mixture was stirred for 30 minutes at 0 °C. Then the solution of 3,3-dimethyl-1-phenylpent-4-en-1-one (20 mmol, 1.0 equiv.) in THF (20 mL) was added to the reaction mixture dropwise at 0 °C. After 30 minutes the ice bath was removed and the mixture was stirred overnight at room temperature, before it was quenched by adding sat. aq. NH<sub>4</sub>Cl solution. Then the aqueous solution was extracted with diethyl ether three times. The combined organic phases were dried over MgSO<sub>4</sub>, filtered and removed in vacuo. The residue was purified by column chromatography on silica gel and eluted with petroleum ether/ethyl acetate (100/1) to afford (4,4-dimethylhexa-1,5-dien-2-yl)benzene **1q** (2.6 g, 67%).

**(4,4-dimethylhexa-1,5-dien-2-yl)benzene (1q):** The title compound was prepared

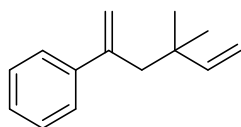

according to the general procedure (Method C) and purified by column chromatography to give the colorless oil (2.6 g, 67%). <sup>1</sup>H

**NMR** (400 MHz, CDCl<sub>3</sub>) δ 0.90 (s, 6H), 2.54 (s, 2H), 4.75-4.83 (m, 2H), 5.01 (t, *J* = 0.8 Hz, 1H), 5.24 (d, *J* = 2.0 Hz, 1H), 5.69-5.76 (m, 1H), 7.20-7.35 (m, 5H); <sup>13</sup>C **NMR** (100 MHz, CDCl<sub>3</sub>) δ 27.2, 37.7, 47.9, 109.9, 116.8, 126.8, 127.1, 128.2, 143.6, 146.8, 148.6. **HRMS** (ESI) calcd. for C<sub>14</sub>H<sub>19</sub> [M+H]: 187.1487, found: 187.1490.

**Procedure D: Synthesis of substrate 1r<sup>1c</sup>**

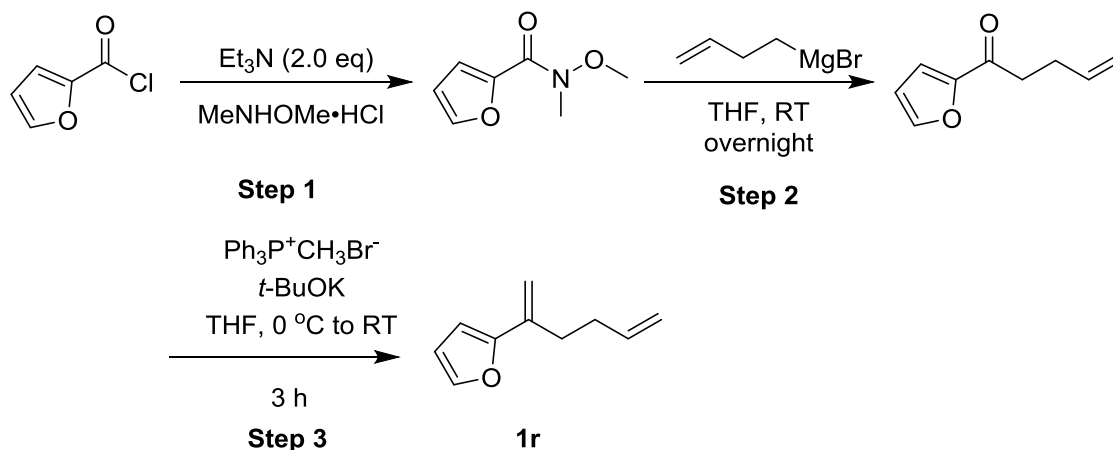

**Step 1:** Triethylamine (100 mmol, 2.0 equiv.) was slowly added to the mixture of furan-2-carbonyl chloride (50 mmol, 1.0 equiv.) and N,O-dimethylhydroxylamine hydrochloride (52.5 mmol, 1.05 equiv.) in dry CH<sub>2</sub>Cl<sub>2</sub> at 0 °C. The reaction mixture was allowed to warm up to room temperature and was stirred for 12 hours. After the addition of HCl (aq., 1.0 N, 100 mL), the phases were separated and the aqueous layer was extracted with CH<sub>2</sub>Cl<sub>2</sub> (40 × 3 mL). The combined organic phases were dried over MgSO<sub>4</sub>, filtered and then the solvent was removed in vacuo to afford the Weinreb amide. The crude product was purified by column chromatography on silica gel and eluted with petroleum ether/ethyl acetate (2/1) to afford N-methoxy-N-methylfuran-2-carboxamide (6.4 g, 82%).

**Step 2:** A solution of 3-butenylmagnesium bromide (0.5 M in THF, 42 mmol, 1.05 equiv.) was added over 1 hour to the solution of N-methoxy-N-methylfuran-2-carboxamide (40 mmol, 1.0 equiv.) in dry THF at 0 °C. The reaction mixture was allowed to warm up to room temperature and was stirred for 3 hours. The pH of the reaction mixture was adjusted to pH = 2 by the addition of HCl (aq., 1.0 N). The phases were separated and the aqueous layer was extracted with diethyl ether (30 × 3 mL). The combined organic phases were dried over MgSO<sub>4</sub>, filtered and the solvent was removed in vacuo. The residue was purified by column chromatography on silica gel and eluted with petroleum ether/ethyl acetate (50/1) to afford 1-(furan-2-yl)pent-4-en-1-one (5 g, 83%).

**Step 3:** To a solution of methyltriphenylphosphonium bromide (41 mmol, 1.25 equiv.) in THF was added *t*-BuOK (40 mmol, 1.2 equiv.) at 0 °C and the resulting mixture was stirred for 30 minutes at 0 °C. Then the solution of 1-(furan-2-yl)pent-4-en-1-one (33 mmol, 1.0 equiv.) in THF was added to the reaction mixture dropwise at 0 °C. After 30 minutes the ice bath was removed and the mixture was stirred overnight at room temperature, before it was quenched by adding sat. aq. NH<sub>4</sub>Cl solution. Then the aqueous solution was extracted with diethyl ether (30 × 3 mL). The combined organic phases were dried over MgSO<sub>4</sub>, filtered and removed in vacuo. The residue was

purified by column chromatography on silica gel and eluted with petroleum ether/ethyl acetate (100/1) to afford 2-(hexa-1,5-dien-2-yl)furan **1r** (3.5 g, 71%).

**2-(hexa-1,5-dien-2-yl)furan (1r):** The title compound was prepared according to the

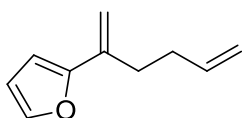

general procedure (Method **D**) and purified by column chromatography on silica gel and eluted with petroleum ether/ethyl acetate (100/1) to give the colorless oil (3.5 g, 71%).

**<sup>1</sup>H NMR** (400 MHz, CDCl<sub>3</sub>) δ 2.30-2.35 (m, 2H), 2.43-2.47 (m, 2H), 4.97-5.08 (m, 3H), 5.54 (s, 1H), 5.82-5.92 (m, 1H), 6.30 (d, *J* = 3.2 Hz, 1H), 6.37-6.38 (m, 1H), 7.35 (d, *J* = 8.0 Hz, 1H); **<sup>13</sup>C NMR** (100 MHz, CDCl<sub>3</sub>) δ 32.7, 32.9, 106.1, 109.6, 111.2, 115.0, 137.0, 138.2, 141.9, 154.7. **HRMS** (ESI) calcd. for C<sub>10</sub>H<sub>13</sub>O [*M*+*H*]: 149.0966, found: 149.0961.

**2-(hexa-1,5-dien-2-yl)thiophene (1s):** The title compound was prepared according to the

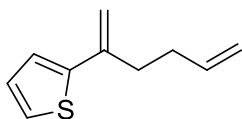

the general procedure (Method **D**) and purified by column chromatography on silica gel and eluted with petroleum ether/ethyl acetate (100/1) to give the colorless oil (5.8 g, 88%).

**<sup>1</sup>H NMR** (400 MHz, CDCl<sub>3</sub>) δ 2.30-2.36 (m, 2H), 2.56 (t, *J* = 6.8 Hz, 2H), 4.97-5.07 (m, 3H), 5.41 (s, 1H), 5.82-5.92 (m, 1H), 6.96-6.98 (m, 1H), 7.03-7.04 (m, 1H), 7.04-7.16 (m, 1H); **<sup>13</sup>C NMR** (100 MHz, CDCl<sub>3</sub>) δ 32.7, 35.0, 111.2, 115.1, 123.4, 124.3, 127.5, 138.1, 141.2, 145.4. **HRMS** (ESI) calcd. for C<sub>10</sub>H<sub>13</sub>S [*M*+*H*]: 165.0738, found: 165.0732.

### 3. Optimization of the reaction conditions

In a glove box, a mixture of Pd(COD)Br<sub>2</sub> (7.5 mg, 0.02 mmol, 5 mol%), ligand (0.024 mmol), acid (0.04 mmol, 10 mol%), anisole (1.0 mL) was added into a dry glass vessel. The resulting mixture was stirred for 10 minutes at room temperature and then diene **1a** (63.2 mg, 0.4 mmol) was added into the reaction mixture. The glass vessel was put into an autoclave and then taken out from glove box. The autoclave was purged and charged with CO (20 atm). The reaction mixture was stirred at 80 °C for 12 hours. After the reaction finished, the autoclave was cooled to room temperature and the

pressure was carefully released in the fume hood. The combined yield (**2a** + **2a'**) based on the diene and the ratio (**2a/2a'**) of the crude reaction mixture was determined by GC and GC-MS analysis using *n*-dodecane as the internal standard, respectively.

**Table S1. Screening of phosphine ligand <sup>a</sup>**

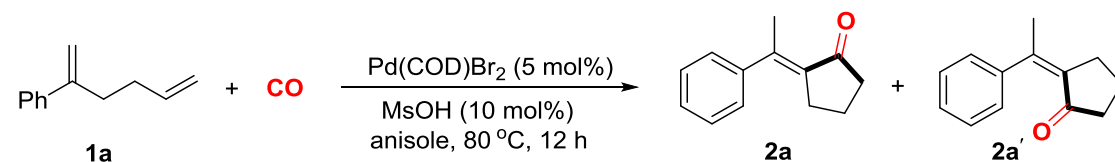

| Entry | [Pd]                               | Ligand                      | CO (atm) | Yield(%)<br><b>2a</b> + <b>2a'</b> | <b>2a/2a'</b> |
|-------|------------------------------------|-----------------------------|----------|------------------------------------|---------------|
| 1     | $\text{Pd}(\text{COD})\text{Br}_2$ | Xantphos                    | 20       | 78                                 | 91:9          |
| 2     | $\text{Pd}(\text{COD})\text{Br}_2$ | DPEphos                     | 20       | 15                                 | 88:12         |
| 3     | $\text{Pd}(\text{COD})\text{Br}_2$ | DPPF                        | 20       | 0                                  | -             |
| 4     | $\text{Pd}(\text{COD})\text{Br}_2$ | DPPH                        | 20       | 0                                  | -             |
| 5     | $\text{Pd}(\text{COD})\text{Br}_2$ | DPPPen                      | 20       | 0                                  | -             |
| 6     | $\text{Pd}(\text{COD})\text{Br}_2$ | DPPB                        | 20       | 0                                  | -             |
| 7     | $\text{Pd}(\text{COD})\text{Br}_2$ | DPPP                        | 20       | 0                                  | -             |
| 8     | $\text{Pd}(\text{COD})\text{Br}_2$ | DPPE                        | 20       | 0                                  | -             |
| 9     | $\text{Pd}(\text{COD})\text{Br}_2$ | DPPM                        | 20       | 0                                  | -             |
| 10    | $\text{Pd}(\text{COD})\text{Br}_2$ | $\text{PPh}_3$              | 20       | 21                                 | 88:12         |
| 11    | $\text{Pd}(\text{COD})\text{Br}_2$ | $\text{P}(2\text{-MePh})_3$ | 20       | trace                              | -             |
| 12    | $\text{Pd}(\text{COD})\text{Br}_2$ | $\text{P}(4\text{-MePh})_3$ | 20       | trace                              | -             |
| 13    | $\text{Pd}(\text{COD})\text{Br}_2$ | $\text{PCy}_3$              | 20       | trace                              | -             |
| 14    | $\text{Pd}(\text{COD})\text{Br}_2$ | Ruphos                      | 20       | trace                              | -             |
| 15    | $\text{Pd}(\text{COD})\text{Br}_2$ | Dave Phos                   | 20       | trace                              | -             |
| 16    | $\text{Pd}(\text{COD})\text{Br}_2$ | Xphos                       | 20       | trace                              | -             |

<sup>a</sup> Reaction conditions: **1a** (0.4 mmol),  $\text{Pd}(\text{COD})\text{Br}_2$  (0.02 mmol), MsOH (0.04 mmol), CO (20 atm), 80 °C, anisole (1.0 mL), 12 h, bidentate phosphine ligand (0.024 mmol) or monodentate phosphine ligand (0.04 mmol). The combined yield based on the diene and the ratio (**2a/2a'**) of the crude reaction mixture was determined by GC and GC-MS analysis using *n*-dodecane as the internal standard.

**Table S2. Screening of palladium <sup>a</sup>**

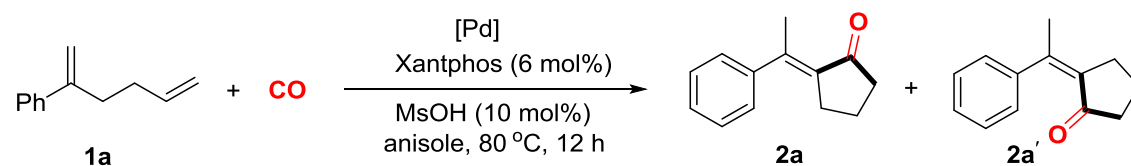

| Entry | [Pd] | Ligand | CO (atm) | Yield (%) | <b>2a/2a'</b> |
|-------|------|--------|----------|-----------|---------------|
|-------|------|--------|----------|-----------|---------------|

|                |                                                     |          |    | <b>2a + 2a'</b> |       |
|----------------|-----------------------------------------------------|----------|----|-----------------|-------|
| 1              | Pd(COD)Br <sub>2</sub>                              | Xantphos | 20 | 78              | 91:9  |
| 2              | PdCl <sub>2</sub>                                   | Xantphos | 20 | 58              | 90:10 |
| 3              | Pd(CH <sub>3</sub> CN) <sub>2</sub> Cl <sub>2</sub> | Xantphos | 20 | 25              | 84:16 |
| 4              | Pd(PhCN) <sub>2</sub> Cl <sub>2</sub>               | Xantphos | 20 | 65              | 88:12 |
| 5              | Pd(COD)Cl <sub>2</sub>                              | Xantphos | 20 | 43              | 90:10 |
| 6              | PdBr <sub>2</sub>                                   | Xantphos | 20 | 62              | 89:11 |
| 7 <sup>b</sup> | Pd <sub>2</sub> (dba) <sub>3</sub>                  | Xantphos | 20 | trace           | -     |
| 8 <sup>b</sup> | [Pd(allyl)Cl] <sub>2</sub>                          | Xantphos | 20 | trace           | -     |
| 9              | -                                                   | Xantphos | 20 | 0               | -     |

<sup>a</sup> Reaction conditions: **1a** (0.4 mmol), [Pd] (0.02 mmol), Xantphos (0.024 mmol), MsOH (0.04 mmol), CO (20 atm), 80 °C, anisole (1.0 mL), 12 h. The combined yield based on the diene and the ratio (**2a/2a'**) of the crude reaction mixture was determined by GC and GC-MS analysis using *n*-dodecane as the internal standard. <sup>b</sup> [Pd] (0.01 mmol).

**Table S3. Screening of acid <sup>a</sup>**

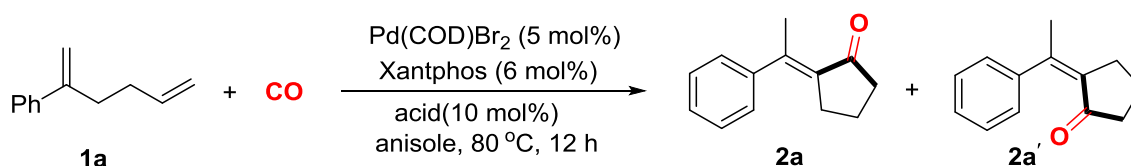

| Entry | [Pd]                   | Ligand   | Acid (10 mol%)                       | Yield (%)       | <b>2a/2a'</b> |
|-------|------------------------|----------|--------------------------------------|-----------------|---------------|
|       |                        |          |                                      | <b>2a + 2a'</b> |               |
| 1     | Pd(COD)Br <sub>2</sub> | Xantphos | MeSO <sub>3</sub> H                  | 78              | 91:9          |
| 2     | Pd(COD)Br <sub>2</sub> | Xantphos | CH <sub>3</sub> CO <sub>2</sub> H    | 0               | -             |
| 3     | Pd(COD)Br <sub>2</sub> | Xantphos | CF <sub>3</sub> CO <sub>2</sub> H    | 22              | 93:7          |
| 4     | Pd(COD)Br <sub>2</sub> | Xantphos | PivOH                                | trace           | -             |
| 5     | Pd(COD)Br <sub>2</sub> | Xantphos | PhCO <sub>2</sub> H                  | trace           | -             |
| 6     | Pd(COD)Br <sub>2</sub> | Xantphos | NH <sub>2</sub> SO <sub>3</sub> H    | trace           | -             |
| 7     | Pd(COD)Br <sub>2</sub> | Xantphos | TsOH                                 | 54              | 91:9          |
| 8     | Pd(COD)Br <sub>2</sub> | Xantphos | PhSO <sub>3</sub> H                  | 73              | 91:9          |
| 9     | Pd(COD)Br <sub>2</sub> | Xantphos | NMP HCl                              | trace           | -             |
| 10    | Pd(COD)Br <sub>2</sub> | Xantphos | NH <sub>2</sub> OCH <sub>3</sub> HCl | 0               | -             |
| 11    | Pd(COD)Br <sub>2</sub> | Xantphos | NH <sub>4</sub> Cl                   | 0               | -             |
| 12    | Pd(COD)Br <sub>2</sub> | Xantphos | PhNHNH <sub>2</sub> HCl              | 0               | -             |
| 13    | Pd(COD)Br <sub>2</sub> | Xantphos | Et <sub>3</sub> N HCl                | 0               | -             |
| 14    | Pd(COD)Br <sub>2</sub> | Xantphos | EtNH <sub>2</sub> HCl                | 0               | -             |
| 15    | Pd(COD)Br <sub>2</sub> | Xantphos | Et <sub>2</sub> NH HCl               | trace           | -             |
| 16    | Pd(COD)Br <sub>2</sub> | Xantphos | Me <sub>2</sub> NH HCl               | trace           | -             |

|    |                        |          |                                       |       |      |
|----|------------------------|----------|---------------------------------------|-------|------|
| 17 | Pd(COD)Br <sub>2</sub> | Xantphos | HCl NH <sub>2</sub> NH <sub>2</sub> H | trace | -    |
| 18 | Pd(COD)Br <sub>2</sub> | Xantphos | Glycine                               | trace | -    |
| 19 | Pd(COD)Br <sub>2</sub> | Xantphos | Semicarbazide                         | trace | -    |
| 20 | Pd(COD)Br <sub>2</sub> | Xantphos | Py HCl                                | trace | -    |
| 21 | Pd(COD)Br <sub>2</sub> | Xantphos | PhNH <sub>2</sub> HCl                 | 29    | 91:9 |
| 22 | Pd(COD)Br <sub>2</sub> | Xantphos | -                                     | 0     | -    |

<sup>a</sup> Reaction conditions: **1a** (0.4 mmol), Pd(COD)Br<sub>2</sub> (0.02 mmol), Xantphos (0.024 mmol), Acid (0.04 mmol, 10 mol%), CO (20 atm), 80 °C, anisole (1.0 mL), 12 h. The combined yield based on the diene and the ratio (**2a/2a'**) of the crude reaction mixture was determined by GC and GC-MS analysis using *n*-dodecane as the internal standard.

**Table S4. Screening of solvent <sup>a</sup>**

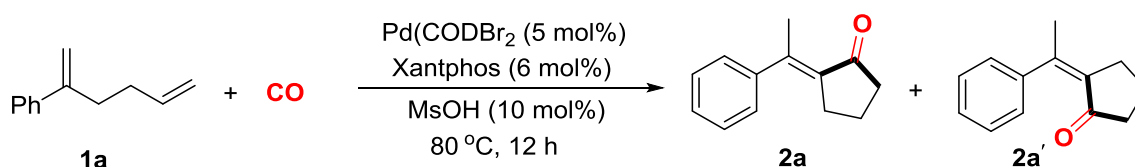

| Entry | [Pd]                   | Ligand   | Solvent            | Yield (%)       | <b>2a/2a'</b> |
|-------|------------------------|----------|--------------------|-----------------|---------------|
|       |                        |          |                    | <b>2a + 2a'</b> |               |
| 1     | Pd(COD)Br <sub>2</sub> | Xantphos | Anisole            | 78              | 91:9          |
| 2     | Pd(COD)Br <sub>2</sub> | Xantphos | Tol                | 76              | 91:9          |
| 3     | Pd(COD)Br <sub>2</sub> | Xantphos | Benzene            | 70              | 92:8          |
| 4     | Pd(COD)Br <sub>2</sub> | Xantphos | NMP                | trace           | -             |
| 5     | Pd(COD)Br <sub>2</sub> | Xantphos | DME                | trace           | -             |
| 6     | Pd(COD)Br <sub>2</sub> | Xantphos | CH <sub>3</sub> CN | trace           | -             |
| 7     | Pd(COD)Br <sub>2</sub> | Xantphos | dioxane            | trace           | -             |

<sup>a</sup> Reaction conditions: **1a** (0.4 mmol), Pd(COD)Br<sub>2</sub> (0.02 mmol), Xantphos (0.024 mmol), MsOH (0.04 mmol), CO (20 atm), 80 °C, Solvent (1.0 mL), 12 h. The combined yield based on the diene and the ratio (**2a/2a'**) of the crude reaction mixture was determined by GC and GC-MS analysis using *n*-dodecane as the internal standard.

**Table S5. Screening of temperature <sup>a</sup>**

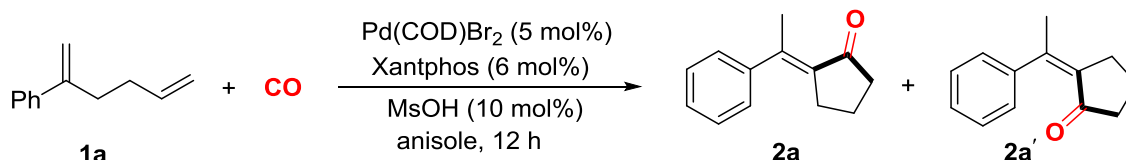

| Entry | [Pd] | Ligand | T (°C) | Yield (%) | <b>2a/2a'</b> |
|-------|------|--------|--------|-----------|---------------|
|-------|------|--------|--------|-----------|---------------|



|   |                        |          |     | <b>2a + 2a'</b> |       |
|---|------------------------|----------|-----|-----------------|-------|
| 1 | Pd(COD)Br <sub>2</sub> | Xantphos | 100 | 48              | 93:7  |
| 2 | Pd(COD)Br <sub>2</sub> | Xantphos | 80  | 78              | 91:9  |
| 3 | Pd(COD)Br <sub>2</sub> | Xantphos | 60  | 43              | 93:7  |
| 4 | Pd(COD)Br <sub>2</sub> | Xantphos | 40  | 12              | 90:10 |
| 5 | Pd(COD)Br <sub>2</sub> | Xantphos | 25  | 0               | -     |

<sup>a</sup> Reaction conditions: **1a** (0.4 mmol), Pd(COD)Br<sub>2</sub> (0.02 mmol), Xantphos (0.024 mmol), MsOH (0.04 mmol), CO (20 atm), 80 °C, anisole (1.0 mL), 12 h. The combined yield based on the diene and the ratio (**2a/2a'**) of the crude reaction mixture was determined by GC and GC-MS analysis using *n*-dodecane as the internal standard.

**Table S6. Screening of concentration and catalyst loading <sup>a</sup>**

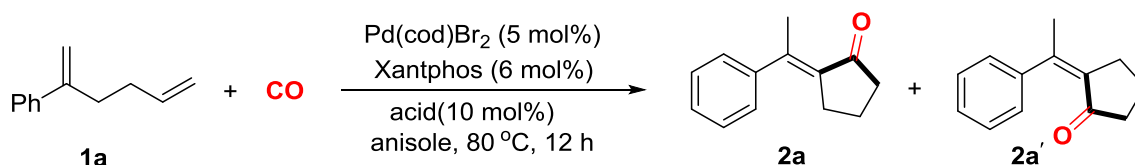

| Entry          | [Pd]                   | Ligand   | anisole (mL) | CO (atm) | Yield(%)        | <b>2a/2a'</b> |
|----------------|------------------------|----------|--------------|----------|-----------------|---------------|
|                |                        |          |              |          | <b>2a + 2a'</b> |               |
| 1              | Pd(COD)Br <sub>2</sub> | Xantphos | 1 mL         | 20       | 78              | 91:9          |
| 2              | Pd(COD)Br <sub>2</sub> | Xantphos | 2 mL         | 20       | 71              | 92:8          |
| 3              | Pd(COD)Br <sub>2</sub> | Xantphos | 3 mL         | 20       | 69              | 92:8          |
| 4 <sup>b</sup> | Pd(COD)Br <sub>2</sub> | Xantphos | 2 mL         | 20       | 74              | 91:9          |
| 5 <sup>b</sup> | Pd(COD)Br <sub>2</sub> | Xantphos | 2 mL         | 30       | 81              | 92:8          |

<sup>a</sup> Reaction conditions: **1a** (0.4 mmol), Pd(COD)Br<sub>2</sub> (0.02 mmol), Xantphos (0.024 mmol), MsOH (0.04 mmol), CO (20 atm), 80 °C, 12 h. The combined yield based on the alkene and the ratio (**2a/2a'**) of the crude reaction mixture was determined by GC and GC-MS analysis using *n*-dodecane as the internal standard. <sup>b</sup> **1a** (1.0 mmol), Pd(COD)Br<sub>2</sub> (0.01 mmol, 1 mol%), Xantphos (0.012 mmol, 1.2 mol%), MsOH (0.1 mmol, 10 mol%), CO (30 atm), 90 °C, anisole (2.0 mL), 16 h.

#### 4. General procedure for the catalytic reaction and spectral data of products

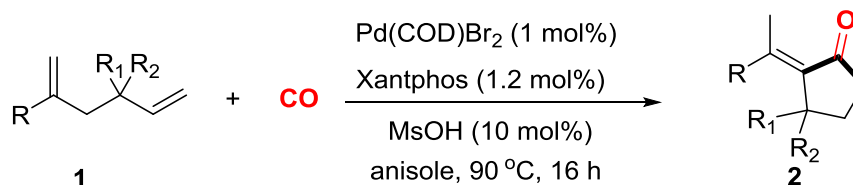

In a glove box, a mixture of Pd(COD)Br<sub>2</sub> (3.7 mg, 0.01 mmol, 1 mol%), Xantphos (6.9 mg, 0.012 mmol), MsOH (6.5 μL, 0.1 mmol), anisole (2.0 mL) was added into a dry glass vessel. The resulting mixture was stirred for 10 minutes at room temperature and then diene **1** (1.0 mmol) was added into the reaction mixture. The glass vessel was put into an autoclave and then taken out from glove box. The autoclave was purged and charged with CO (30 atm). The reaction mixture was stirred at 90 °C for 16 hours. After the reaction finished, the autoclave was cooled to room temperature and the pressure was carefully released in the fume hood. The ratio (E/Z) of the crude reaction mixture was determined by GC and GC-MS analysis. Then the corresponding reaction mixture was purified by flash column chromatography on silica gel and eluted with petroleum ether/ethyl acetate (100/1-10/1) to give the desired products **2**.

**(E)-2-(1-phenylethylidene)cyclopentan-1-one (2a):** Known compound.<sup>3</sup> The title compound was prepared according to the general procedure and purified by column

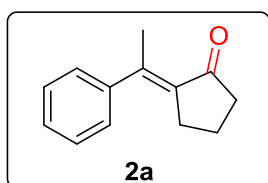

chromatography on silica gel and eluted with petroleum ether/ethyl acetate (100/1-30/1) to give a pale yellow solid, 135.2 mg, 73% yield. <sup>1</sup>H NMR (400 MHz, CDCl<sub>3</sub>) δ 1.76-1.82 (m, 2H) 2.38 (t, *J* = 7.6 Hz, 2H), 2.53 (t, *J* = 2.0 Hz 3H), 2.56-2.60 (m, 2H), 7.24-7.25 (m, 2H), 7.26-7.32 (m, 1H), 7.35-7.39 (m, 2H); <sup>13</sup>C NMR (100 MHz, CDCl<sub>3</sub>) δ 20.1, 20.5, 31.8, 40.7, 127.4, 127.9, 128.3, 132.8, 143.7, 147.7, 209.1. HRMS (ESI) calcd. for C<sub>13</sub>H<sub>15</sub>O [M+H]: 187.1117, found: 187.1115.

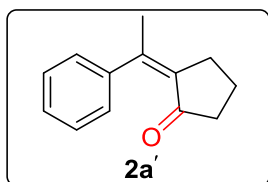

**(Z)-2-(1-phenylethylidene)cyclopentan-1-one (2a'):** Known compound.<sup>5</sup> The title compound was prepared according to the

general procedure and purified by column chromatography on silica gel and eluted with petroleum ether/ethyl acetate (100/1-30/1) to give a pale yellow solid. **<sup>1</sup>H NMR** (400 MHz, CDCl<sub>3</sub>) δ 1.91-1.99 (m, 2H), 2.11 (t, *J* = 1.6 Hz, 3H), 2.31 (t, *J* = 8.0 Hz, 2H), 2.74-2.78 (m, 2H), 7.14-7.17 (m, 2H), 7.22-7.36 (m, 3H); **<sup>13</sup>C NMR** (100 MHz, CDCl<sub>3</sub>) δ 19.4, 25.0, 30.1, 40.4, 127.4, 127.5, 127.9, 132.2, 141.8, 146.6, 205.1. **HRMS** (ESI) calcd. for C<sub>13</sub>H<sub>15</sub>O [*M*+*H*]: 187.1123, found: 187.1122.

**(*E*)-2-(1-(*p*-tolyl)ethylidene)cyclopentan-1-one (2b):** The title compound was prepared according to the general procedure and purified by column chromatography

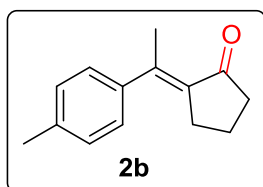

on silica gel and eluted with petroleum ether/ethyl acetate (100/1-30/1) to give the pale yellow oil, 146.1 mg, 73% yield.

**<sup>1</sup>H NMR** (400 MHz, CDCl<sub>3</sub>) δ 1.74-1.82 (m, 2H), 2.35-2.39 (m, 5H), 2.52 (t, *J* = 2.0 Hz, 3H), 2.57-2.61 (m, 2H), 7.15-7.19 (m, 4H); **<sup>13</sup>C NMR** (100 MHz, CDCl<sub>3</sub>) δ 19.9, 20.4, 21.3, 31.9, 40.6, 127.3, 128.9, 132.4, 137.8, 140.6, 147.6, 208.9. **HRMS** (ESI) calcd. for C<sub>14</sub>H<sub>17</sub>O [*M*+*H*]: 201.1274, found: 201.1276.

**(*E*)-2-(1-(*m*-tolyl)ethylidene)cyclopentan-1-one (2c):** The title compound was prepared according to the general procedure and purified by

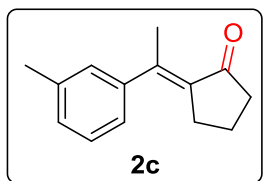

column chromatography on silica gel and eluted with petroleum ether/ethyl acetate (100/1-30/1) to give the pale yellow oil,

141.7 mg, 71% yield. **<sup>1</sup>H NMR** (400 MHz, CDCl<sub>3</sub>) δ 1.75-1.82 (m, 2H), 2.35-2.39 (m, 5H), 2.52 (t, *J* = 2.0 Hz, 3H), 2.55-2.60 (m, 2H), 7.03-7.06 (m, 2H), 7.10-7.13 (m, 1H), 7.24-7.27 (m, 1H); **<sup>13</sup>C NMR** (100 MHz, CDCl<sub>3</sub>) δ 20.1, 20.4, 21.5, 31.8, 40.6, 124.4, 127.9, 128.2, 128.6, 132.5, 137.9, 143.6, 147.8, 209.0. **HRMS** (ESI) calcd. for C<sub>14</sub>H<sub>17</sub>O [*M*+*H*]: 201.1274, found: 201.1275.

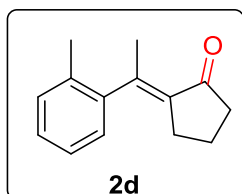

**(*E*)-2-(1-(*o*-tolyl)ethylidene)cyclopentan-1-one (2d):** The title compound was prepared according to the general procedure and

purified by column chromatography on silica gel and eluted with petroleum ether/ethyl acetate (100/1-30/1) to give the pale yellow oil, 101.0 mg, 50% yield.  $^1\text{H NMR}$  (400 MHz,  $\text{CDCl}_3$ )  $\delta$  1.76-1.84 (m, 2H), 2.19-2.23 (m, 4H), 2.26-2.33 (m, 1H), 2.37-2.42 (m, 5H), 6.94-6.98 (m, 1H), 7.17-7.22 (m, 3H);  $^{13}\text{C NMR}$  (100 MHz,  $\text{CDCl}_3$ )  $\delta$  19.1, 20.0, 20.3, 30.6, 40.8, 126.1, 126.1, 127.3, 130.4, 132.9, 133.2, 143.6, 148.7, 208.8. **HRMS** (ESI) calcd. for  $\text{C}_{14}\text{H}_{17}\text{O}$   $[\text{M}+\text{H}]$ : 201.1274, found: 201.1275.

**(E)-2-(1-(4-ethylphenyl)ethylidene)cyclopentan-1-one (2e):** The title compound was

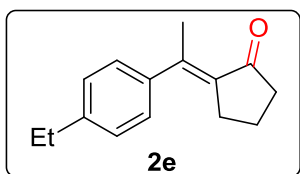

prepared according to the general procedure and purified by column chromatography on silica gel and eluted with petroleum ether/ethyl acetate (100/1-30/1) to give the pale yellow oil, 162.4 mg, 76% yield.  $^1\text{H NMR}$  (400 MHz,

$\text{CDCl}_3$ )  $\delta$  1.25 (t,  $J = 7.6$  Hz, 3H), 1.75-1.82 (m, 2H), 2.37 (t,  $J = 7.6$  Hz, 2H), 2.52 (t,  $J = 2.0$  Hz, 3H), 2.58-2.69 (m, 4H), 7.20-7.26 (m, 4H);  $^{13}\text{C NMR}$  (100 MHz,  $\text{CDCl}_3$ )  $\delta$  15.5, 20.0, 20.6, 28.7, 32.1, 40.7, 127.5, 127.7, 132.5, 140.8, 144.2, 209.2. **HRMS** (ESI) calcd. for  $\text{C}_{15}\text{H}_{19}\text{O}$   $[\text{M}+\text{H}]$ : 215.1430, found: 215.1430.

**(E)-2-(1-(4-(tert-butyl)phenyl)ethylidene)cyclopentan-1-one (2f):** The title

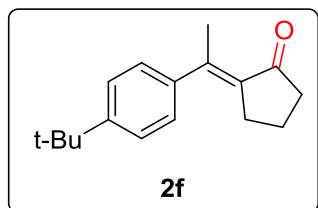

compound was prepared according to the general procedure and purified by column chromatography on silica gel and eluted with petroleum ether/ethyl acetate (100/1-30/1) to give a pale yellow solid, 178.2 mg, 74% yield.  $^1\text{H NMR}$

(400 MHz,  $\text{CDCl}_3$ )  $\delta$  1.34 (s, 9H), 1.75-1.83 (m, 2H), 2.38 (t,  $J = 7.6$  Hz, 2H), 2.53 (t,  $J = 2.0$  Hz, 3H), 2.61-2.65 (m, 2H), 7.21-7.23 (m, 2H), 7.37-7.41 (m, 2H);  $^{13}\text{C NMR}$  (100 MHz,  $\text{CDCl}_3$ )  $\delta$  19.9, 20.6, 31.4, 32.2, 34.8, 40.7, 125.1, 127.3, 132.5, 140.5, 147.6, 151.1, 209.2. **HRMS** (ESI) calcd. for  $\text{C}_{17}\text{H}_{23}\text{O}$   $[\text{M}+\text{H}]$ : 243.1743, found: 243.1746.

**(*E*)-2-(1-(4-methoxyphenyl)ethylidene)cyclopentan-1-one (2g):** The title compound

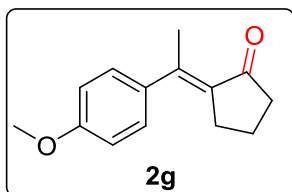

was prepared according to the general procedure and purified by column chromatography on silica gel and eluted with petroleum ether/ethyl acetate (100/1-10/1) to give a pale yellow solid, 116.5 mg, 54% yield.  $^1\text{H}$  NMR (400 MHz,  $\text{CDCl}_3$ )  $\delta$  1.75-1.82 (m, 2H), 2.37 (t,  $J$  = 7.6 Hz, 2H), 2.52 (t,  $J$  = 2.0 Hz, 3H), 2.60-2.65 (m, 2H), 3.83 (s, 3H), 6.88-6.92 (m, 2H), 7.22-7.27 (m, 2H);  $^{13}\text{C}$  NMR (100 MHz,  $\text{CDCl}_3$ )  $\delta$  19.9, 20.6, 32.2, 40.6, 55.4, 113.6, 129.1, 132.2, 135.8, 147.2, 159.4, 208.9. HRMS (ESI) calcd. for  $\text{C}_{14}\text{H}_{17}\text{O}_2$  [ $\text{M}+\text{H}$ ]: 217.1228, found: 217.1226.

The compound was also confirmed by single-crystal X-ray analysis

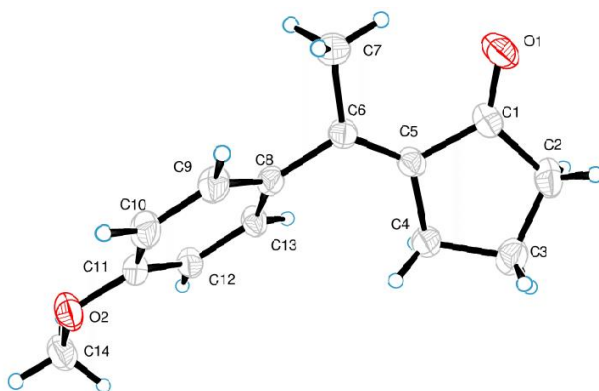

**Figure S1.** ORTEP drawing of complex **2g**

**(*E*)-2-(1-(4-fluorophenyl)ethylidene)cyclopentan-1-one (2h):** The title compound

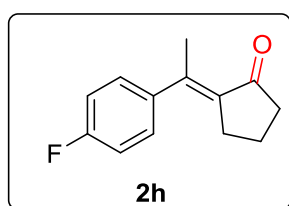

was prepared according to the general procedure and purified by column chromatography on silica gel and eluted with petroleum ether/ethyl acetate (100/1-20/1) to give the pale yellow oil, 110.2 mg, 54% yield.  $^1\text{H}$  NMR (400 MHz,  $\text{CDCl}_3$ )

$\delta$  1.77-1.84 (m, 2H), 2.39 (t,  $J$  = 7.2 Hz, 2H), 2.51 (t,  $J$  = 2.0 Hz, 3H), 2.54-2.59 (m, 2H), 7.03-7.09 (m, 2H), 7.22-7.26 (m, 2H);  $^{13}\text{C}$  NMR (100 MHz,  $\text{CDCl}_3$ )  $\delta$  20.1, 20.5, 31.9, 40.6, 115.4 (d,  $J_{\text{C-F}}$  = 20.0 Hz), 129.3 (d,  $J_{\text{C-F}}$  = 10.0 Hz), 133.0, 139.6 (d,  $J_{\text{C-F}}$  = 10.0 Hz), 146.5, 163.5 (d,  $J_{\text{C-F}}$  = 240.0 Hz), 208.9;  $^{19}\text{F}$  NMR (376 MHz,  $\text{CDCl}_3$ )  $\delta$  -113.62. HRMS (ESI) calcd. for  $\text{C}_{13}\text{H}_{14}\text{FO}$  [ $\text{M}+\text{H}$ ]: 205.1029, found: 205.1024.

**(E)-2-(1-(4-chlorophenyl)ethylidene)cyclopentan-1-one (2i):** The title compound

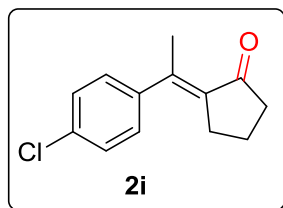

was prepared according to the general procedure and purified by column chromatography on silica gel and eluted with petroleum ether/ethyl acetate (100/1-20/1) to give the pale yellow oil, 136.5 mg, 62% yield.  $^1\text{H NMR}$  (400 MHz,  $\text{CDCl}_3$ )

$\delta$  1.77-1.84 (m, 2H), 2.38 (t,  $J = 8.0$  Hz, 2H), 2.50 (t,  $J = 2.0$  Hz, 3H), 2.53-2.58 (m, 2H), 7.18-7.21 (m, 2H), 7.33-7.36 (m, 2H);  $^{13}\text{C NMR}$  (100 MHz,  $\text{CDCl}_3$ )  $\delta$  19.8, 20.4, 31.8, 40.5, 128.5, 128.8, 133.1, 133.7, 141.9, 146.1, 208.7. **HRMS** (ESI) calcd. for  $\text{C}_{13}\text{H}_{14}\text{ClO}$   $[\text{M}+\text{H}]$ : 221.0728, found: 221.0728.

**(E)-2-(1-(4-bromophenyl)ethylidene)cyclopentan-1-one (2j):** The title compound

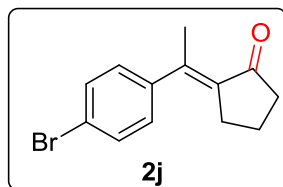

was prepared according to the general procedure and purified by column chromatography on silica gel and eluted with petroleum ether/ethyl acetate (100/1-20/1) to give a pale yellow solid, 158.8 mg, 60% yield.  $^1\text{H NMR}$  (400 MHz,

$\text{CDCl}_3$ )  $\delta$  1.77-1.84 (m, 2H), 2.38 (t,  $J = 7.6$  Hz, 2H), 2.49 (t,  $J = 2.0$  Hz, 3H), 2.53-2.58 (m, 2H), 7.12-7.15 (m, 2H), 7.48-7.52 (m, 2H);  $^{13}\text{C NMR}$  (100 MHz,  $\text{CDCl}_3$ )  $\delta$  19.7, 20.3, 31.7, 40.5, 121.9, 129.1, 131.5, 133.1, 142.4, 146.0, 208.7. **HRMS** (ESI) calcd. for  $\text{C}_{13}\text{H}_{13}\text{BrNaO}$   $[\text{M}+\text{Na}]$ : 287.0042, found: 287.0037.

**(E)-2-(1-([1,1'-biphenyl]-4-yl)ethylidene)cyclopentan-1-one (2k):** The title

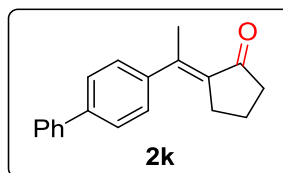

compound was prepared according to the general procedure and purified by column chromatography on silica gel and eluted with petroleum ether/ethyl acetate (100/1-30/1) to give a white solid, 163.1 mg, 62% yield.  $^1\text{H NMR}$  (400 MHz,

$\text{CDCl}_3$ )  $\delta$  1.77-1.84 (m, 2H), 2.39 (t,  $J = 7.6$  Hz, 2H), 2.56 (t,  $J = 2.0$  Hz, 3H), 2.62-2.66 (m, 2H), 7.32-7.37 (m, 3H), 7.42-7.46 (m, 2H), 7.58-7.62 (m, 4H);  $^{13}\text{C NMR}$  (100 MHz,  $\text{CDCl}_3$ )  $\delta$  19.9, 20.6, 32.1, 40.7, 127.0, 127.2, 127.7, 128.0, 129.0,

132.9, 140.6, 140.8, 142.4, 147.1, 209.1. **HRMS** (ESI) calcd. for C<sub>19</sub>H<sub>18</sub>NaO [M+Na]: 285.1250, found: 285.1248.

**(E)-2-(1-(4-(trifluoromethyl)phenyl)ethylidene)cyclopentan-1-one (2l):** The title

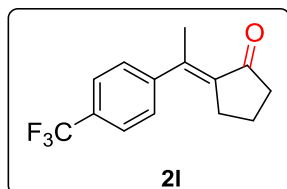

compound was prepared according to the general procedure and purified by column chromatography on silica gel and eluted with petroleum ether/ethyl acetate (100/1-10/1) to give a pale yellow solid, 117.6 mg, 46% yield. **<sup>1</sup>H NMR** (400 MHz,

CDCl<sub>3</sub>) δ 1.79-1.86 (m, 2H), 2.41 (t, *J* = 8.0 Hz, 2H), 2.52-2.56 (m, 5H), 7.36 (q, *J* = 8.0 Hz, 2H), 7.64 (q, *J* = 8.0 Hz, 2H); **<sup>13</sup>C NMR** (100 MHz, CDCl<sub>3</sub>) δ 19.8, 20.3, 31.6, 40.6, 122.8, 125.4 (d, *J*<sub>C-F</sub> = 4.0 Hz), 129.9 (d, *J*<sub>C-F</sub> = 32.0 Hz), 130.1, 130.4, 133.7, 145.8, 147.2, 208.8. **HRMS** (ESI) calcd. for C<sub>14</sub>H<sub>13</sub>F<sub>3</sub>NaO [M+Na]: 277.0811, found: 277.0808.

**(E)-4-(1-(2-oxocyclopentylidene)ethyl)benzonitrile (2m):** The title compound was

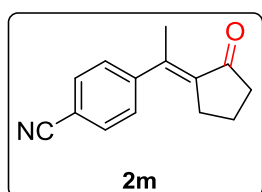

prepared according to the general procedure and purified by column chromatography on silica gel and eluted with petroleum ether/ethyl acetate (100/1-10/1) to give a pale yellow solid, 69.8 mg, 33% yield. **<sup>1</sup>H NMR** (400 MHz, CDCl<sub>3</sub>) δ 1.80-1.87 (m,

2H), 2.41 (t, *J* = 7.6 Hz, 2H), 2.51-2.55 (m, 5H), 7.35-7.37 (d, *J* = 8.0 Hz, 2H), 7.68-7.70 (m, 2H); **<sup>13</sup>C NMR** (100 MHz, CDCl<sub>3</sub>) δ 19.6, 20.3, 31.6, 40.5, 111.6, 118.7, 128.2, 132.3, 134.0, 145.0, 148.2, 208.6. **HRMS** (ESI) calcd. for C<sub>14</sub>H<sub>13</sub>NNaO [M+Na]: 234.0889, found: 234.0888.

**Methyl (E)-4-(1-(2-oxocyclopentylidene)ethyl)benzoate (2n):** The title compound

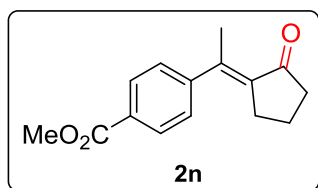

was prepared according to the general procedure and purified by column chromatography on silica gel and eluted with petroleum ether/ethyl acetate (100/1-10/1) to give a pale yellow solid, 138.3 mg, 57% yield. **<sup>1</sup>H NMR** (400

MHz, CDCl<sub>3</sub>) δ 1.78-1.85 (m, 2H), 2.39 (t, *J* = 8.0 Hz, 2H), 2.53-2.67 (m, 5H), 3.93 (d,

$J=0.8$  Hz, 3H), 7.31-7.33 (m, 2H), 8.04-8.06 (m, 2H);  $^{13}\text{C}$  NMR (100 MHz,  $\text{CDCl}_3$ )  $\delta$  19.8, 20.4, 31.6, 40.6, 52.3, 127.4, 129.5, 129.7, 133.4, 146.3, 148.2, 166.8, 208.9. **HRMS** (ESI) calcd. for  $\text{C}_{15}\text{H}_{16}\text{NaO}_3$   $[\text{M}+\text{Na}]$ : 267.0992, found: 267.0989.

**(*E*)-2-(1-(naphthalen-2-yl)ethylidene)cyclopentan-1-one (2o):** The title compound

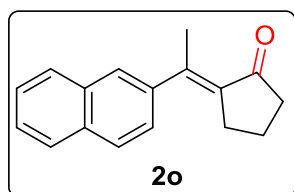

was prepared according to the general procedure and purified by column chromatography on silica gel and eluted with petroleum ether/ethyl acetate (100/1-30/1) to give a pale yellow solid, 156.0 mg, 66% yield.  $^1\text{H}$  NMR (400 MHz,  $\text{CDCl}_3$ )  $\delta$  1.76-1.83 (m, 2H), 2.40 (t,  $J = 7.6$  Hz, 2H), 2.58-2.64 (m, 5H), 7.36-7.38 (m, 1H), 7.47-7.51 (m, 2H), 7.69-7.70 (m, 1H), 7.81-7.84 (m, 3H);  $^{13}\text{C}$  NMR (100 MHz,  $\text{CDCl}_3$ )  $\delta$  20.1, 20.5, 31.9, 40.6, 125.4, 126.5, 127.8, 128.0, 128.2, 132.8, 133.1, 133.1, 141.0, 147.5, 208.9. **HRMS** (ESI) calcd. for  $\text{C}_{17}\text{H}_{16}\text{NaO}$   $[\text{M}+\text{Na}]$ : 259.1093, found:

259.1086.

**(*E*)-2-(1-(naphthalen-1-yl)ethylidene)cyclopentan-1-one (2p):** The title compound

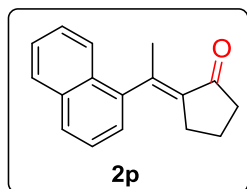

was prepared according to the general procedure and purified by column chromatography on silica gel and eluted with petroleum ether/ethyl acetate (100/1-30/1) to give a pale yellow solid, 117.9 mg, 50% yield.  $^1\text{H}$  NMR (400 MHz,  $\text{CDCl}_3$ )  $\delta$  1.71-1.79(m, 2H), 2.12-2.29(m, 2H), 2.43 (t,  $J = 7.6$  Hz, 2H), 2.60 (t,  $J = 2.0$  Hz, 3H), 7.19-7.21 (m, 1H), 7.45-7.51 (m, 3H), 7.70-7.72 (m, 1H), 7.79 (d,  $J = 8.4$  Hz, 1H), 7.86-7.89 (m, 1H);  $^{13}\text{C}$  NMR (100 MHz,  $\text{CDCl}_3$ )  $\delta$  19.9, 21.1, 30.8, 40.8, 123.6, 125.0, 125.7, 126.1, 126.5, 127.7, 128.7, 129.2, 133.8, 134.3, 141.8, 147.3, 208.9. **HRMS** (ESI) calcd. for  $\text{C}_{17}\text{H}_{16}\text{NaO}$   $[\text{M}+\text{Na}]$ : 259.1093, found: 259.1092.

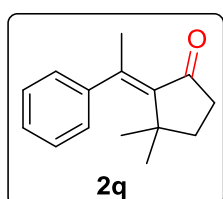

**(*E*)-3,3-dimethyl-2-(1-phenylethylidene)cyclopentan-1-one (2q):** The title compound was prepared according to the general procedure and purified by column chromatography on silica gel



and eluted with petroleum ether/ethyl acetate (100/1-30/1) to give a pale yellow solid, 120.1 mg, 56% yield. **<sup>1</sup>H NMR** (400 MHz, CDCl<sub>3</sub>) δ 0.87 (s, 6H), 1.65 (t, *J* = 7.6 Hz, 2H), 2.38 (t, *J* = 8.0 Hz, 2H), 2.44 (s, 3H), 7.08-7.11 (m, 2H), 7.27-7.36 (m, 3H); **<sup>13</sup>C NMR** (100 MHz, CDCl<sub>3</sub>) δ 24.1, 29.2, 37.1, 37.4, 42.0, 127.0, 127.2, 128.0, 140.8, 143.8, 149.9, 210.2. **HRMS** (ESI) calcd. for C<sub>15</sub>H<sub>19</sub>O [*M*+*H*]: 215.1430, found: 215.1434.

**(*E*)-2-(1-(furan-2-yl)ethylidene)cyclopentan-1-one (2r):** The title compound was

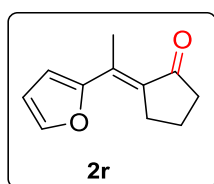

prepared according to the general procedure and purified by column chromatography on silica gel and eluted with petroleum ether/ethyl acetate (100/1-20/1) to give the pale yellow oil, 75.4 mg, 43% yield.

**<sup>1</sup>H NMR** (400 MHz, CDCl<sub>3</sub>) δ 1.89-1.97 (m, 2H), 2.38 (t, *J* = 8.0 Hz, 2H), 2.54 (t, *J* = 2.0 Hz, 3H), 2.95-2.99 (m, 2H), 6.51 (dd, *J*<sub>1</sub> = 3.6 Hz, *J*<sub>2</sub> = 1.6 Hz, 1H), 6.69 (d, *J* = 3.6 Hz, 1H), 7.55 (d, *J* = 1.6 Hz, 1H); **<sup>13</sup>C NMR** (100 MHz, CDCl<sub>3</sub>) δ 14.9, 20.0, 32.4, 40.5, 112.1, 114.2, 129.7, 134.0, 144.0, 155.1, 209.5. **HRMS** (ESI) calcd. for C<sub>11</sub>H<sub>13</sub>O<sub>2</sub> [*M*+*H*]: 177.0916, found: 177.0899.

**(*E*)-2-(1-(thiophen-2-yl)ethylidene)cyclopentan-1-one (2s):** The title compound was

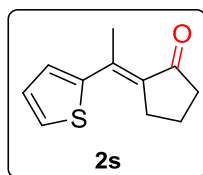

prepared according to the general procedure and purified by column chromatography on silica gel and eluted with petroleum ether/ethyl acetate (100/1-20/1) to give a pale yellow solid, 108.0 mg, 56% yield.

**<sup>1</sup>H NMR** (400 MHz, CDCl<sub>3</sub>) δ 1.90-1.97 (m, 2H), 2.41 (t, *J* = 8.0 Hz, 2H), 2.68 (t, *J* = 2.0 Hz, 3H), 2.92-2.96 (m, 2H), 7.11-7.14 (m, 1H), 7.34-7.35 (m, 1H), 7.46-7.47 (m, 1H); **<sup>13</sup>C NMR** (100 MHz, CDCl<sub>3</sub>) δ 19.0, 20.2, 33.2, 40.7, 127.5, 128.1, 129.2, 131.0, 139.2, 145.7, 208.9. **HRMS** (ESI) calcd. for C<sub>11</sub>H<sub>12</sub>ONaS [*M*+*H*]: 215.0509, found: 215.0494.

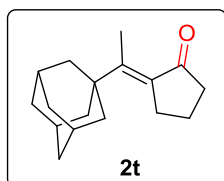

**(*E*)-2-(1-((1S,3S)-adamantan-1-yl)ethylidene)cyclopentan-1-one (2t):** The title compound was prepared according to the general

procedure and purified by column chromatography on silica gel and eluted with petroleum ether/ethyl acetate (100/1-30/1) to give the pale yellow oil, 67.1mg, 28% yield.  $^1\text{H NMR}$  (400 MHz,  $\text{CDCl}_3$ )  $\delta$  1.71 (br, 6H), 1.78-1.84 (m, 2H), 1.89-1.99 (br, 6H), 2.0 (s, 3H), 2.20-2.25 (m, 5H), 2.86-2.90 (m, 2H);  $^{13}\text{C NMR}$  (100 MHz,  $\text{CDCl}_3$ )  $\delta$  15.7, 20.5, 28.9, 32.2, 36.9 39.4, 39.7, 40.7, 131.4, 159.3, 210.5. **HRMS** (ESI) calcd. for  $\text{C}_{17}\text{H}_{25}\text{O}$   $[\text{M}+\text{H}]$ : 245.1900, found: 245.1892.

## 5. Gram-scale synthesis of **2a**

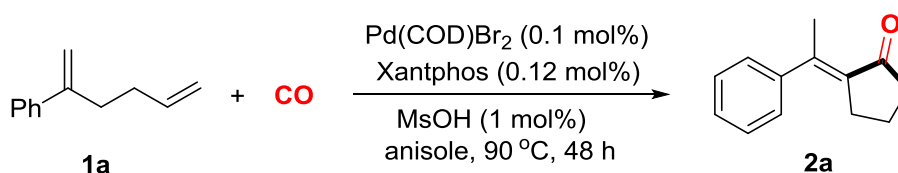

In a glove box, a mixture of  $\text{Pd(COD)Br}_2$  (3.7 mg, 0.01 mmol, 0.1 mol%), Xantphos (6.9 mg, 0.012 mmol, 0.12 mol%), MsOH (6.5  $\mu\text{L}$ , 0.1 mmol, 1 mol%), anisole (10.0 mL) was added into a 50 mL round-bottomed flask. The resulting mixture was stirred for 10 minutes at room temperature and then 1,5-diene **1a** (10 mmol) was added into the reaction mixture. The round-bottomed flask was put into an autoclave and then taken out from glove box. The autoclave was purged and charged with CO (30 atm). The reaction mixture was stirred at 90  $^\circ\text{C}$  for 48 hours. After the reaction finished, the autoclave was cooled to room temperature and the pressure was carefully released in the fume hood, solvent was removed under reduced pressure. The ratio (**2a/2a'**) of the crude reaction mixture was determined by GC and GC-MS. Then the corresponding reaction mixture was purified by flash column chromatography on silica gel and eluted with petroleum ether/ethyl acetate (100/1-30/1) to give the desired products **2a** (910.1 mg, 49% yield), **2a/2a'** = 91 : 9.

## 6. Mechanistic studies

### 6.1 Reaction of **1a** under MsOH

MsOH (6.5 $\mu\text{L}$ , 0.1 mmol), 1,5-diene **1a** (1.0 mmol), anisole (2.0 mL) were added to a 25 mL flame-dried Young-type tube under nitrogen atmosphere. The reaction

mixture was stirred for 16 hour at 90 °C. After the reaction finished, the solvent was removed under reduced pressure. The combined yield (**A** + **A'**) based on the diene and the ratio (**A**/**A'**) of the crude reaction mixture was determined by GC and GC-MS analysis using *n*-dodecane as the internal standard. Then the corresponding reaction mixture was purified by flash column chromatography on silica gel and eluted with petroleum to give the desired products **A** + **A'**.

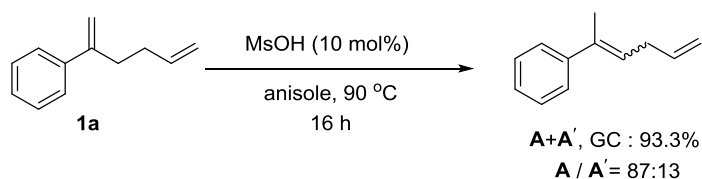

**Hexa-2,5-dien-2-ylbenzene (**A**+**A'**):** A colorless oil. (*E*)-hexa-2,5-dien-2-ylbenzene

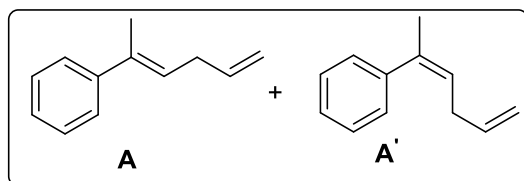

(**A**): Known compound.<sup>4</sup> <sup>1</sup>H NMR (400 MHz, CDCl<sub>3</sub>) δ: 2.03-2.04 (m, 3H), 2.94-2.97 (m, 2H), 5.00-5.12 (m, 2H), 5.77-5.93 (m, 2H), 7.20-7.40 (m, 5H);

(*Z*)-hexa-2,5-dien-2-ylbenzene (**A'**): Known compound.<sup>4</sup> <sup>1</sup>H NMR (400 MHz, CDCl<sub>3</sub>) δ: 2.04-2.05 (m, 3H), 2.70-2.74 (m, 2H), 4.95-5.05 (m, 2H), 5.47-5.51 (m, 1H), 5.76-5.86 (m, 1H), 7.17-7.34 (m, 5H).

## 6.2 Cyclocarbonylation of 1,4-diene (**A**+**A'**)

In a glove box, a mixture of Pd(COD)Br<sub>2</sub> (3.7 mg, 0.01 mmol, 1 mol%), Xantphos (6.9 mg, 0.012 mmol), MsOH (6.5 μL, 0.1 mmol), anisole (2 mL) was added into a dry glass vessel. The resulting mixture was stirred for 10 minutes at room temperature and then 1,4-diene (**A**:**A'**= **81**:**19**) (1.0 mmol) was added into the reaction mixture. The glass vessel was put into an autoclave and then taken out from glove box. The autoclave was purged and charged with CO (30 atm). The reaction mixture was stirred at 90 °C for 16 hours. After the reaction finished, the autoclave was cooled to room temperature and the pressure was carefully released in the fume hood. The ratio (**2a**/**2a'**)

of the crude reaction mixture was determined by GC and GC-MS. Then the corresponding reaction mixture was purified by flash column chromatography on silica gel and eluted with petroleum ether/ethyl acetate (100/1-30/1) to give the desired products **2a** (111.4 mg, 60% yield), **2a/2a'** = 91 : 9.

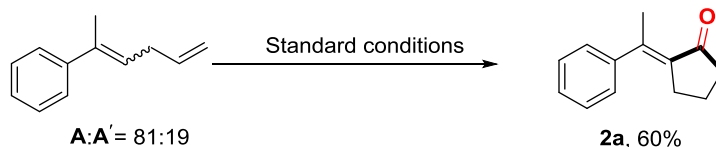

### 6.3 Reaction profile

In a glove box, a mixture of Pd(COD)Br<sub>2</sub> (11.1 mg, 0.03 mmol, 1 mol%), Xantphos (20.7 mg, 0.036 mmol), MsOH (19.2 μL, 0.1 mmol), anisole (15 mL) was added into a PTFE vessel. The resulting mixture was stirred for 10 minutes at room temperature and then diene **1a** (3.0 mmol) was added into the reaction mixture. The PTFE vessel was put into an autoclave and then taken out from glove box. The autoclave was purged and charged with CO (30 atm). The reaction mixture was stirred at 90 °C. Yields were determined by GC and GC-MS analysis using *n*-dodecane as the internal standard.

**Table S7** Reaction profile of Pd-catalyzed hydrocarbonylative cyclization of **1a**.

| <i>t</i> (min) | <b>1a</b> (%) | <b>A</b> (%) | <b>2a</b> (%) | <b>A'</b> (%) |
|----------------|---------------|--------------|---------------|---------------|
| 0              | 100           | 0            | 0             | 0             |
| 20             | 94.5          | 5.5          | 0             | 0             |
| 60             | 74.5          | 19.4         | 2.3           | 1.0           |
| 100            | 58.7          | 31.5         | 2.7           | 1.1           |
| 140            | 47.5          | 40.0         | 2.7           | 2.0           |
| 200            | 26.0          | 55.7         | 6.3           | 2.3           |
| 260            | 17.6          | 59.3         | 9.3           | 2.6           |
| 320            | 13.7          | 59.3         | 11.9          | 2.6           |
| 380            | 10.5          | 55.5         | 17.5          | 2.8           |
| 440            | 8.1           | 52.9         | 21.2          | 2.7           |
| 500            | 6.6           | 46.2         | 28.0          | 2.6           |
| 560            | 5.6           | 40.8         | 33.2          | 2.5           |
| 620            | 4.9           | 38.2         | 36.7          | 2.3           |
| 680            | 4.2           | 32.8         | 42.2          | 2.2           |
| 740            | 3.6           | 29.5         | 45.2          | 2.0           |
| 800            | 3.2           | 25.1         | 49.5          | 1.7           |
| 860            | 2.5           | 20.5         | 54.3          | 1.7           |
| 920            | 2.4           | 19.4         | 55.5          | 1.7           |
| 980            | 2.3           | 17.9         | 57.0          | 1.6           |

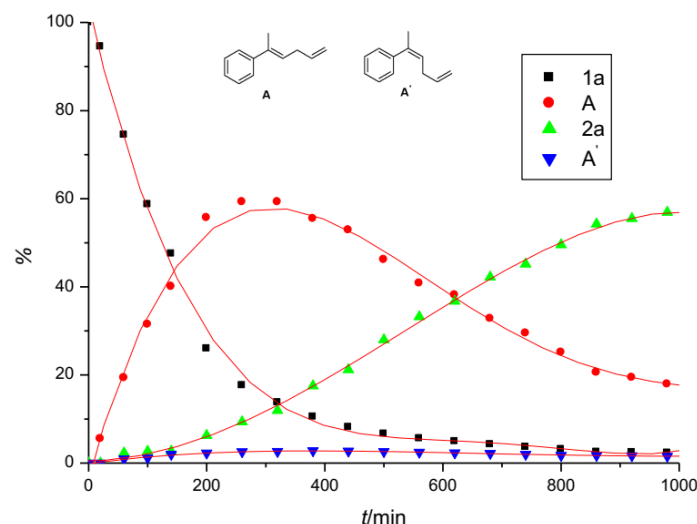

**Figure S2** Reaction profile of Pd-catalyzed hydrocarbonylative cyclization of **1a**.

## 7. References

- (1) (a) Imai, M.; Tanaka, M.; Tanaka, K.; Yamamoto, Y.; Imai-Ogata, N.; Shimowatari, M.; Nagumo, S.; Kawahara, No.; Suemune, H. Double-Chelation-Assisted Rh-Catalyzed Intermolecular Hydroacylation between Salicylaldehydes and 1,4-Penta- or 1,5-Hexadienes. *J. Org. Chem.* **2004**, *69*, 1144. (b) Jiang, B.; Meng, F.; Liang, Q.; Xu, Y.; Loh, T-P. Palladium-Catalyzed Direct Intramolecular C–N Bond Formation: Access to Multisubstituted Dihydropyrroles. *Org. Lett.* **2017**, *19*, 914. (c) Uehara, K. B.; Wagner, C.; Vogler, T.; Luftmann, H.; Studer, A. Poly(vinyl ketone)s by Controlled Boron Group Transfer Polymerization (BGTP). *Angew. Chem. Int. Ed.* **2010**, *49*, 3073.
- (2) (a) Ikeda, H.; Minegishi, T.; Miyashi, T.; Lakkaraju, P. S.; Sauers, R. R.; Roth, H. D. Incorporation of 2-Arylhexas-1,5-diene into Pentasil Zeolite: A Distorted 1-Arylcyclohexane-1,4-diyl Radical Cation at Room Temperature. *J. Phys. Chem. B*, **2005**, *109*, 2504. (b) Xu, S.; Wang, C.; Komiyama, M.; Tomonari, Y.; Negishi, E-i.

Asymmetric Synthesis of Chiral Cyclopentanes Bearing an All - Carbon Quaternary Stereocenter by Zirconium - Catalyzed Double Carboalumination. *Angew. Chem. Int. Ed.* **2017**, *56*, 11502. (c) Li, W.; Yuan, W.; Shi, M.; Hernandez, E.; Li, G. Rhodium(I)-Catalyzed Intramolecular Ene Reaction of Vinylidenecyclopropanes and Alkenes for the Formation of Bicyclo[5.1.0]octylenes. *Org. Lett.* **2010**, *12*, 64. (d) Overman, L. E.; Renaldo, A. E. Catalyzed Sigmatropic Rearrangements. 10. Mechanism of the Palladium Dichloride Catalyzed Cope Rearrangement of Acyclic Dienes. A Substituent Effect Study. *J. Am. Chem. Soc.* **1990**, *112*, 3945.

(3) Larock, R. C.; Reddy, C. K. Synthesis of 2-Alkylidenecyclopentanones via Palladium-Catalyzed Carbopalladation/Ring Expansion of 1-(1-Alkynyl)cyclobutanols. *J. Org. Chem.* **2002**, *67*, 2027.

(4) Matsubara, R.; Jamison, T. F. Nickel-Catalyzed Allylic Substitution of Simple Alkenes. *J. Am. Chem. Soc.* **2010**, *132*, 6880.

(5) Thottumkara, A. P.; Kurokawa, T.; Du Bois, J. Carbocyclization of Unsaturated Thioesters under Palladium Catalysis. *Chem. Sci.* **2013**, *4*, 2686.

## 8. Copies for $^1\text{H}$ NMR, $^{19}\text{F}$ NMR and $^{13}\text{C}$ NMR of materials and products

ZSC-X180810-3-CDC13-HNMR-1a

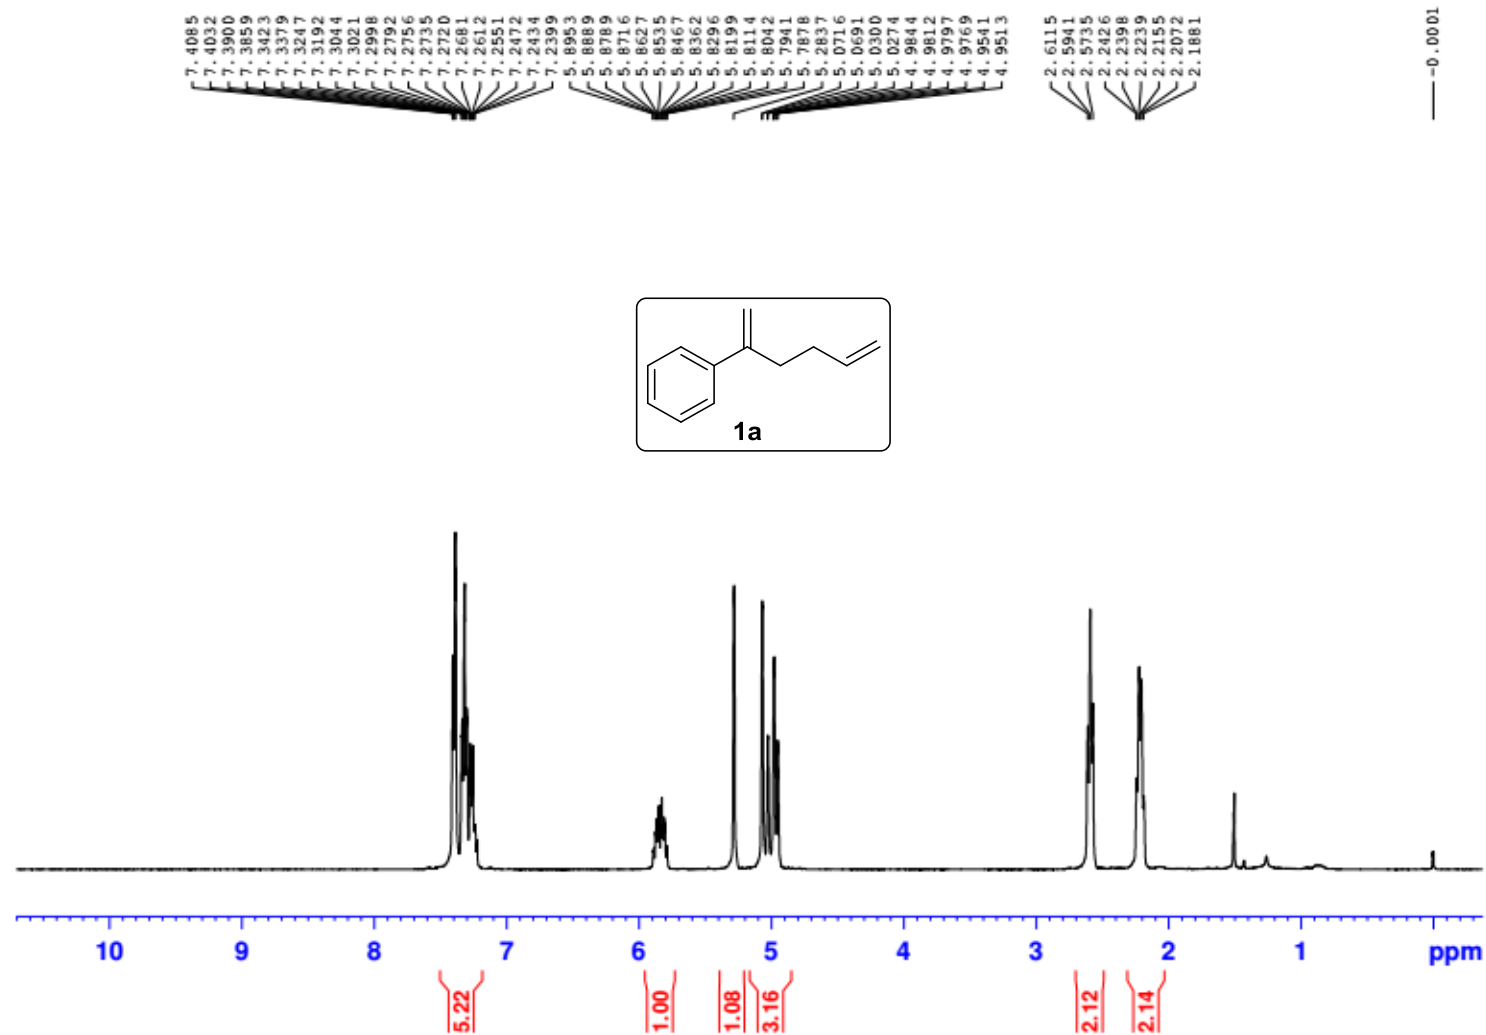

ZSC-X180810-3-CDC13-HNMR-1a

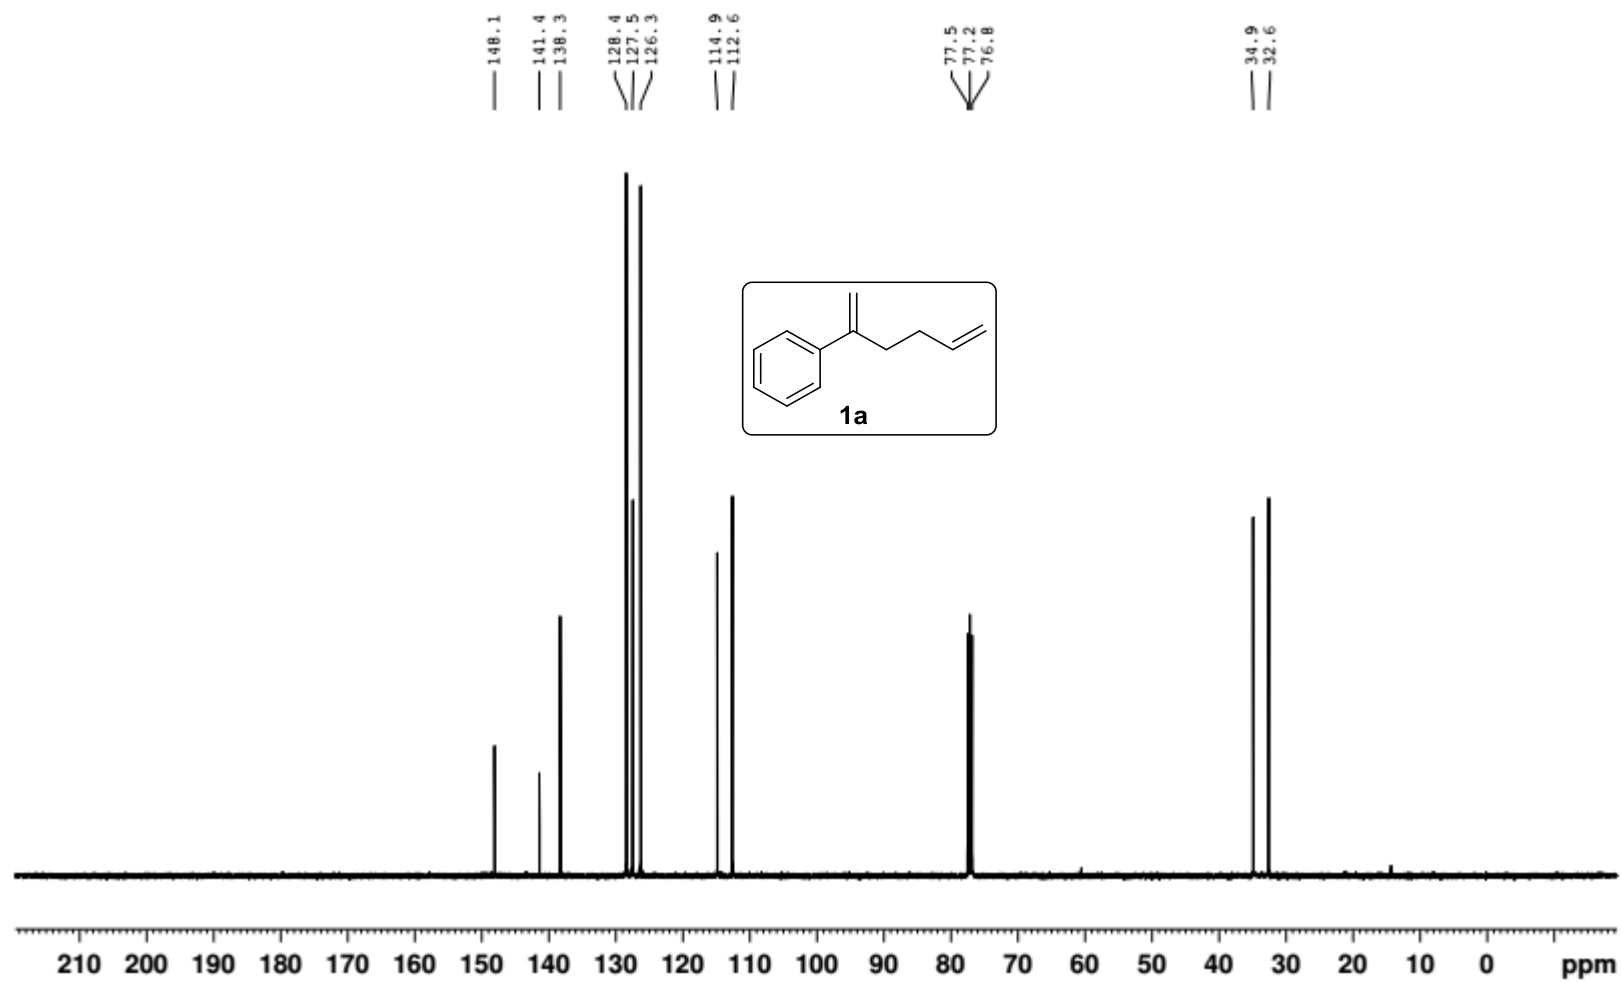



HY-X180222-1-CDC13-HNMR

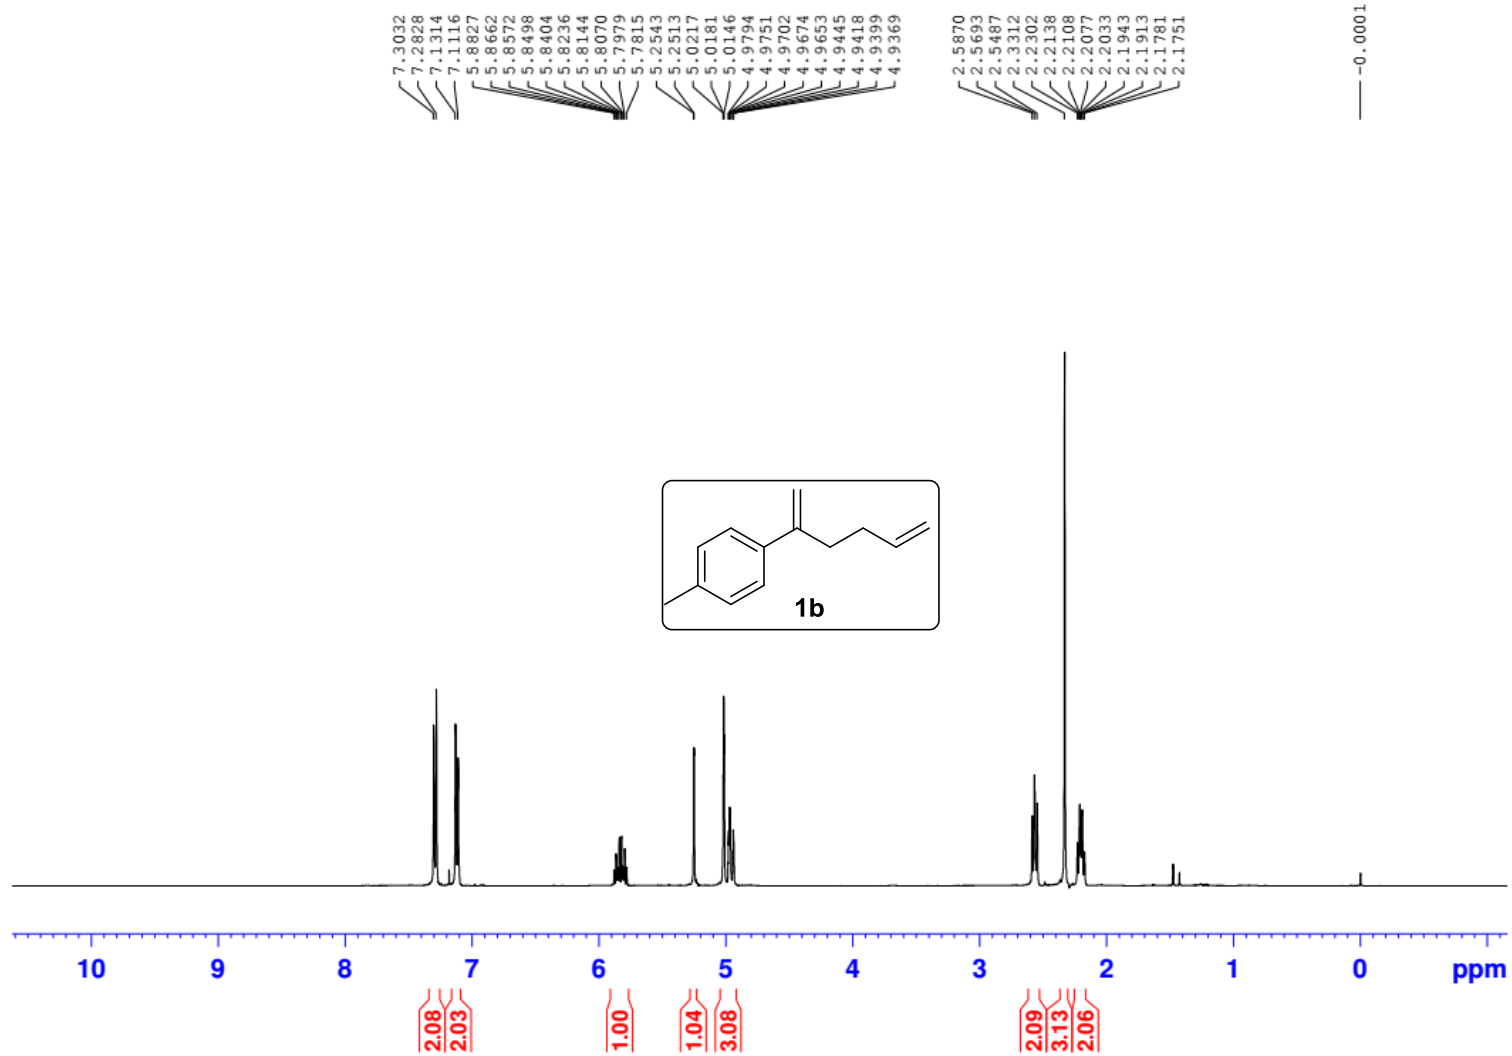

HY-X180122-1-CDC13-CNMR

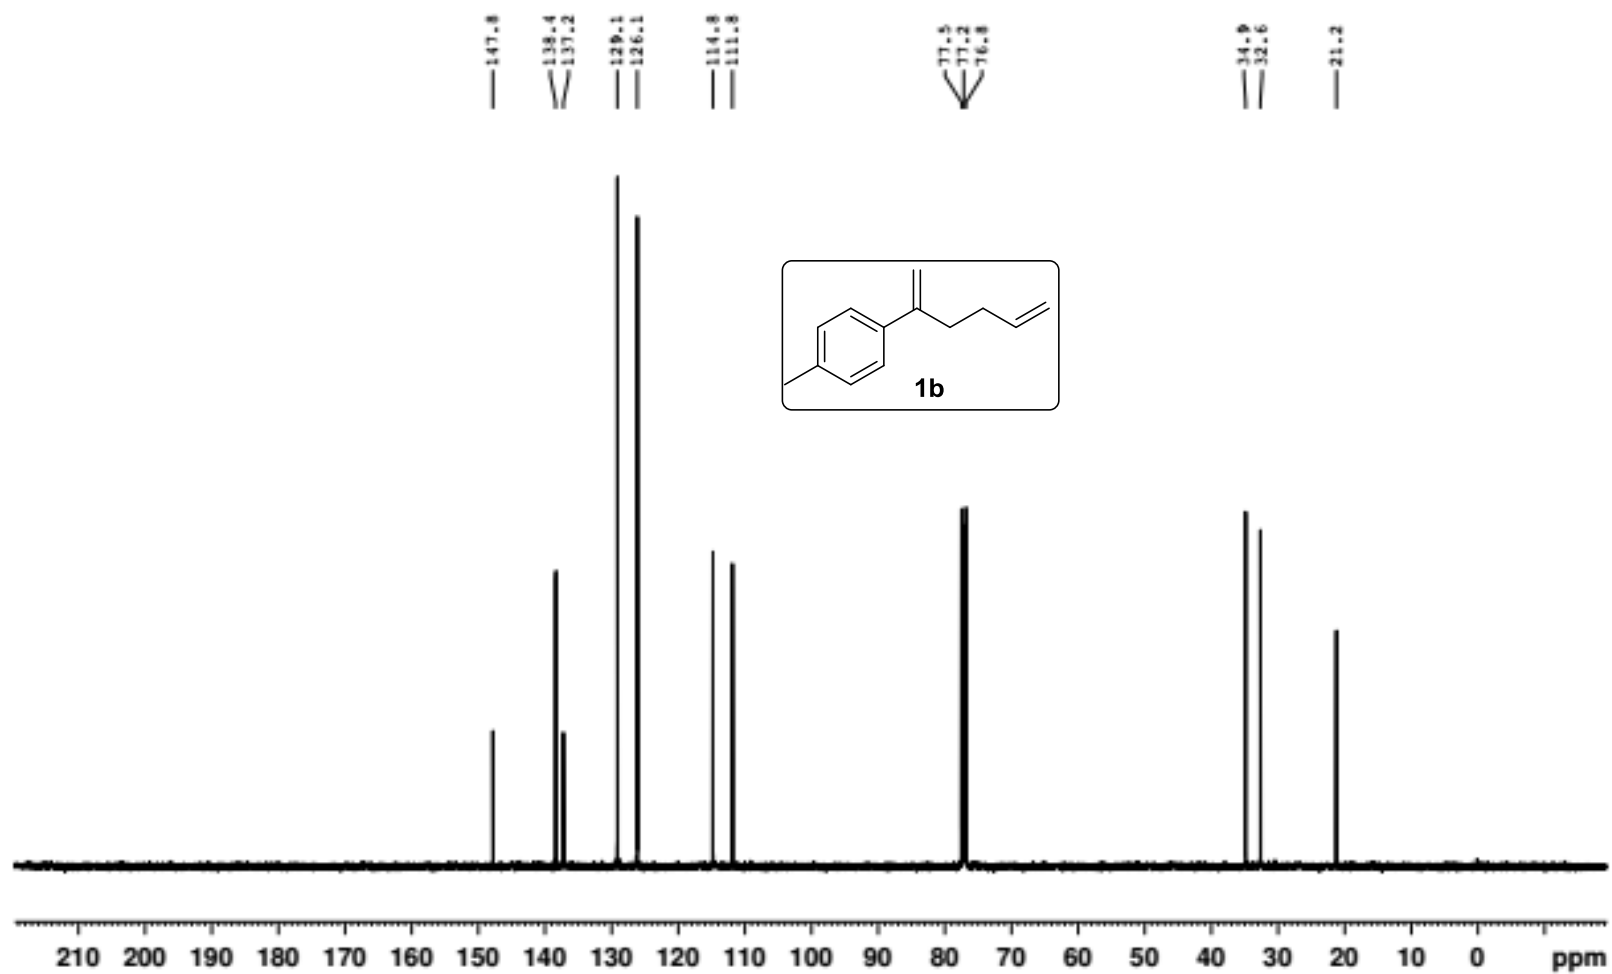

HY-X180122-3-CDC13-HNMR

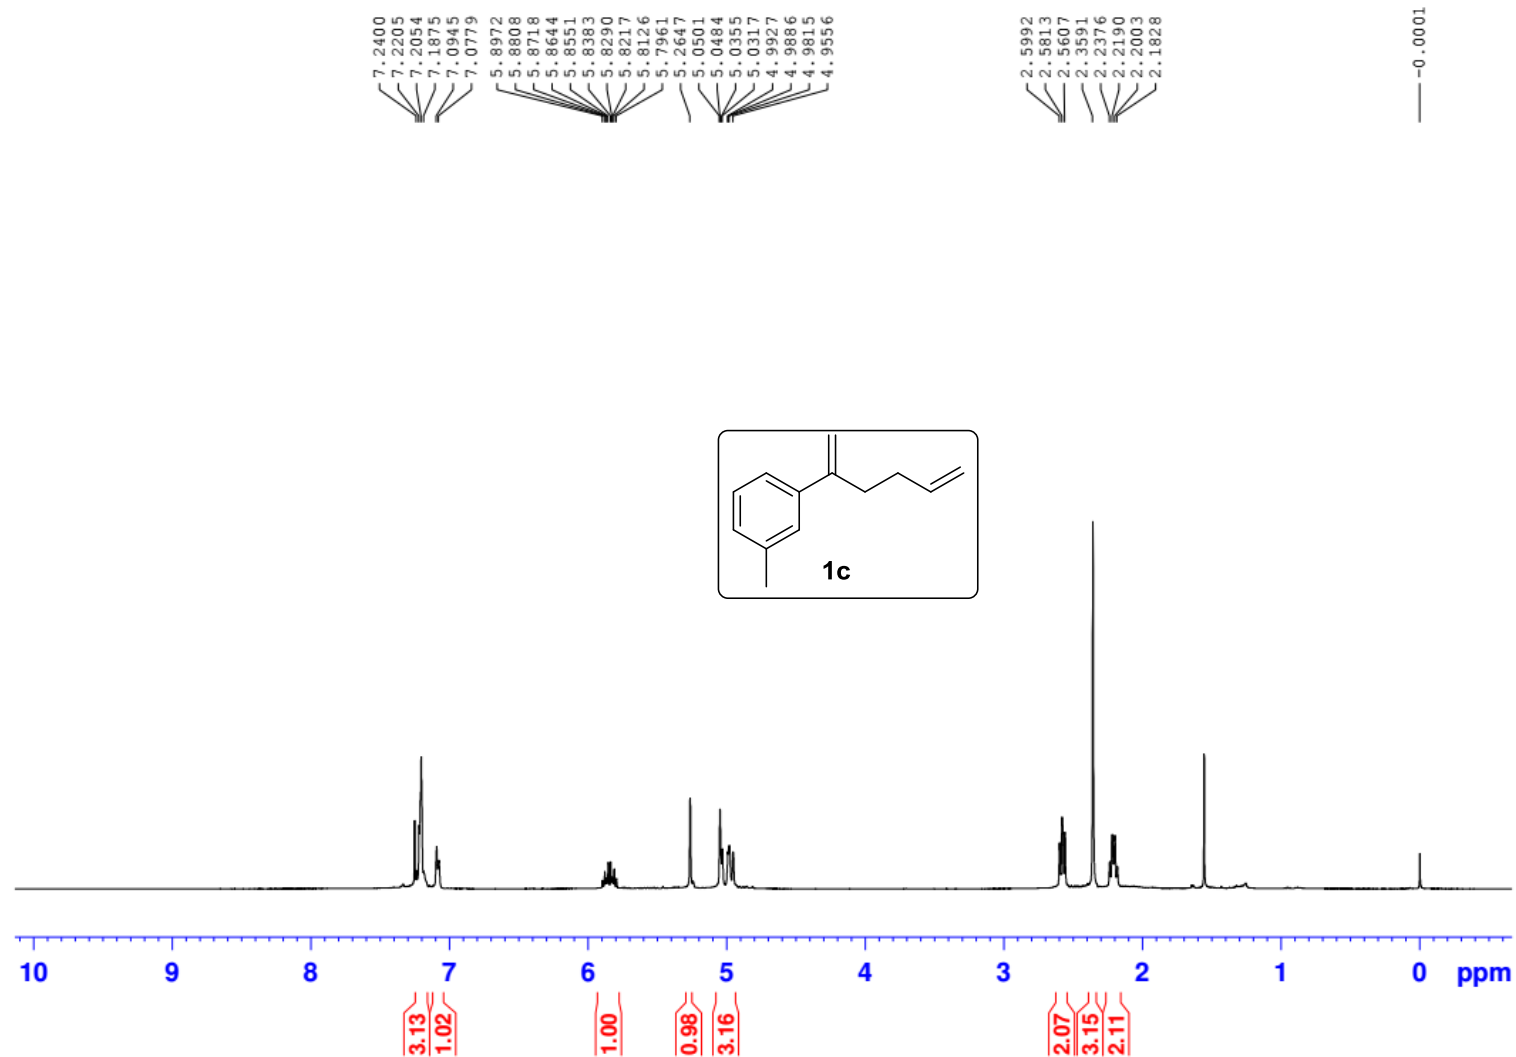

HY-X180122-3-CHCl<sub>3</sub>-CNMR

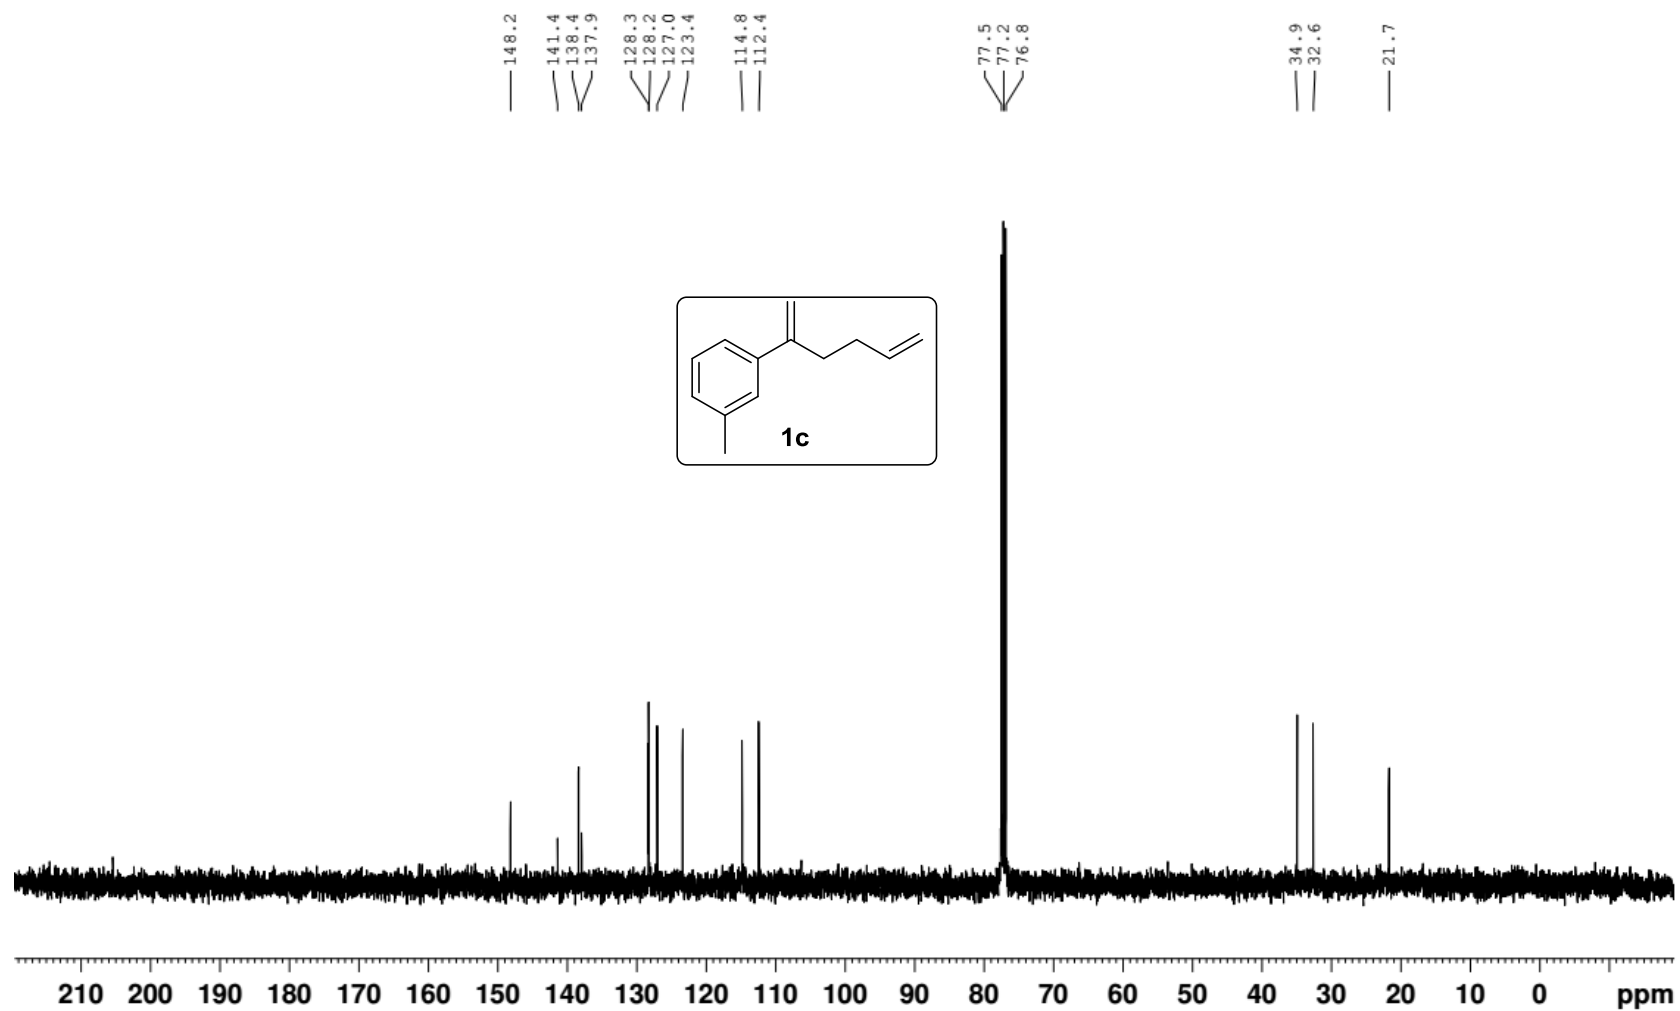

HY-X180401-1-CDC13-HNMR

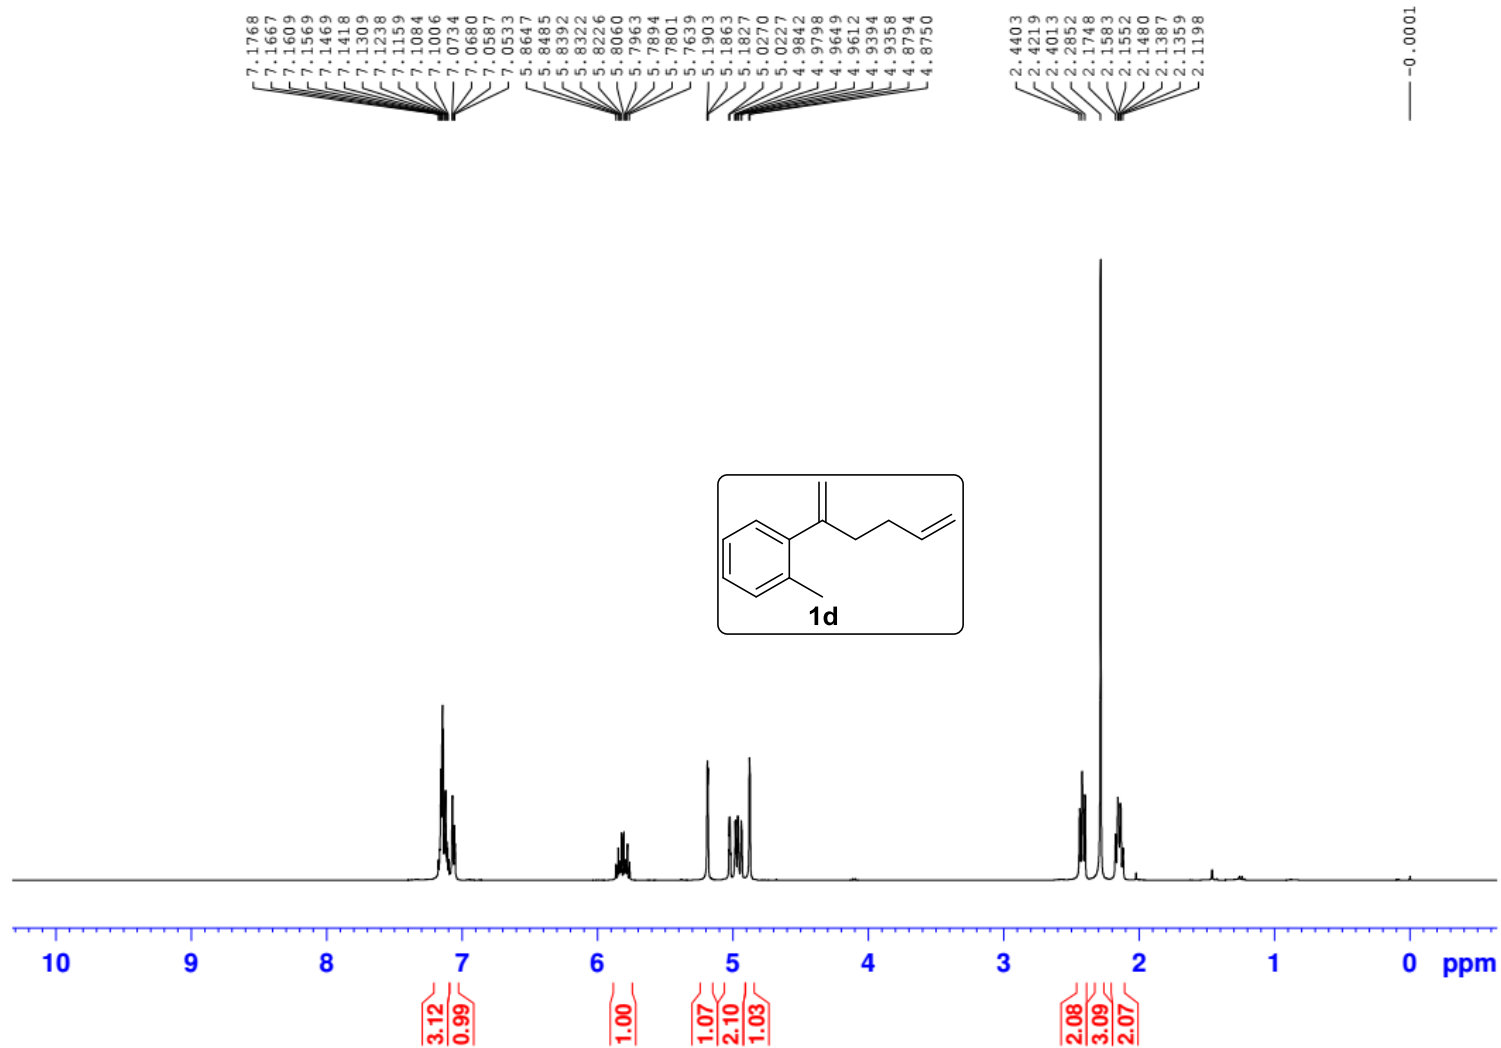

HY-X180401-1-CDC13-CNMR

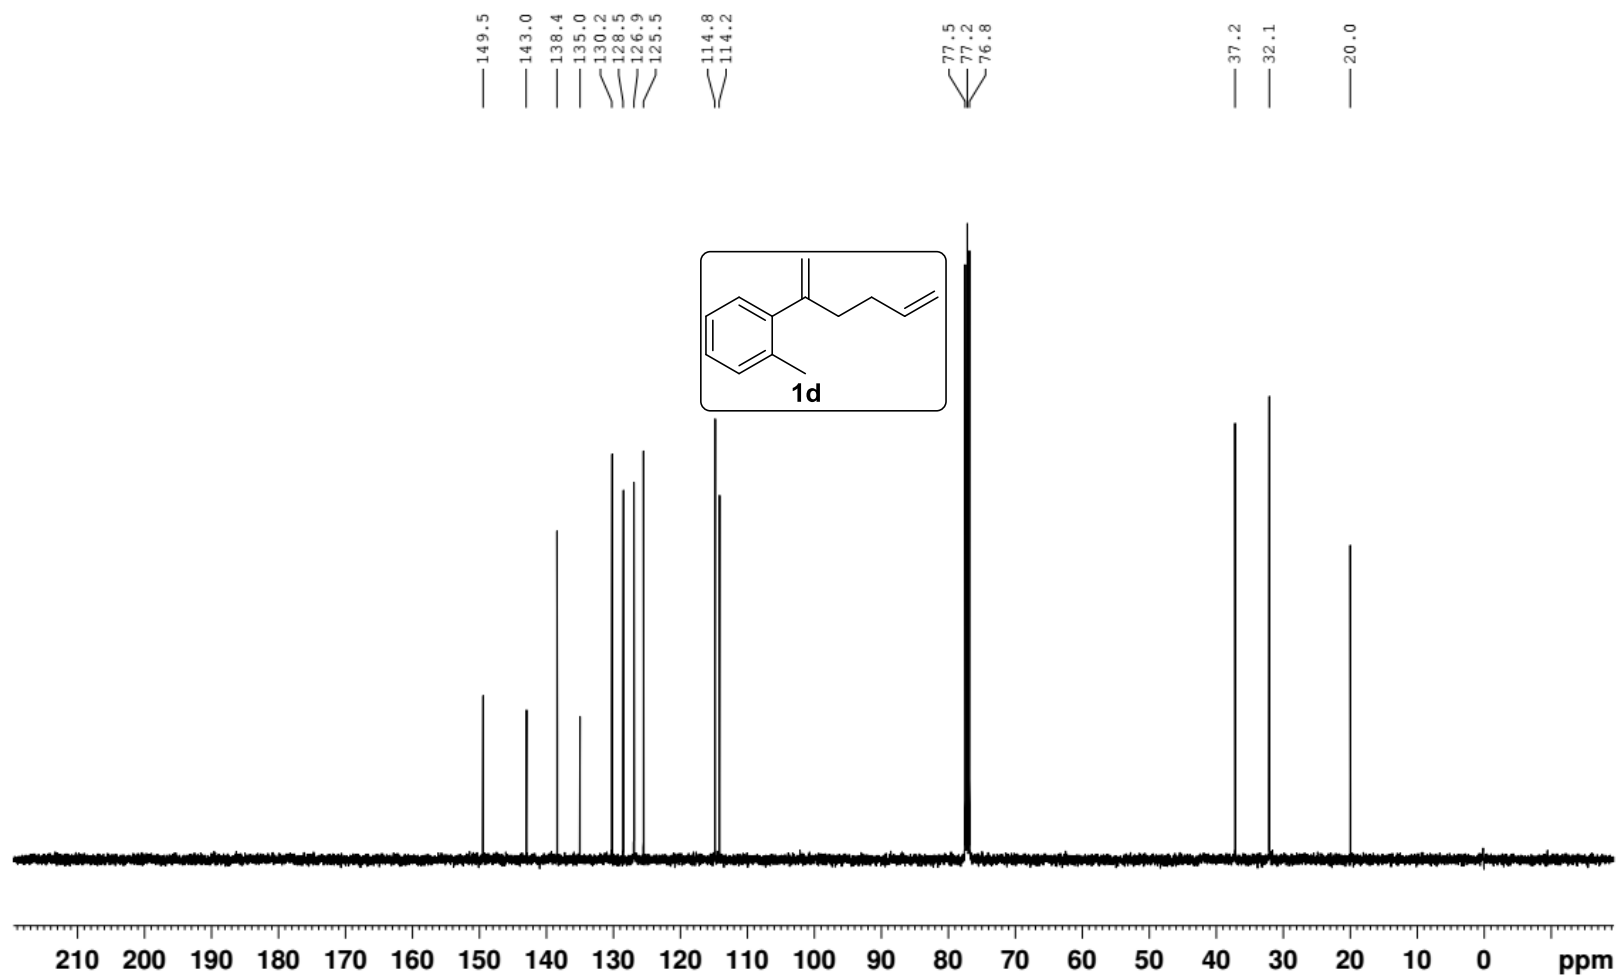

HY-X180124-5-CDC13-HNMR

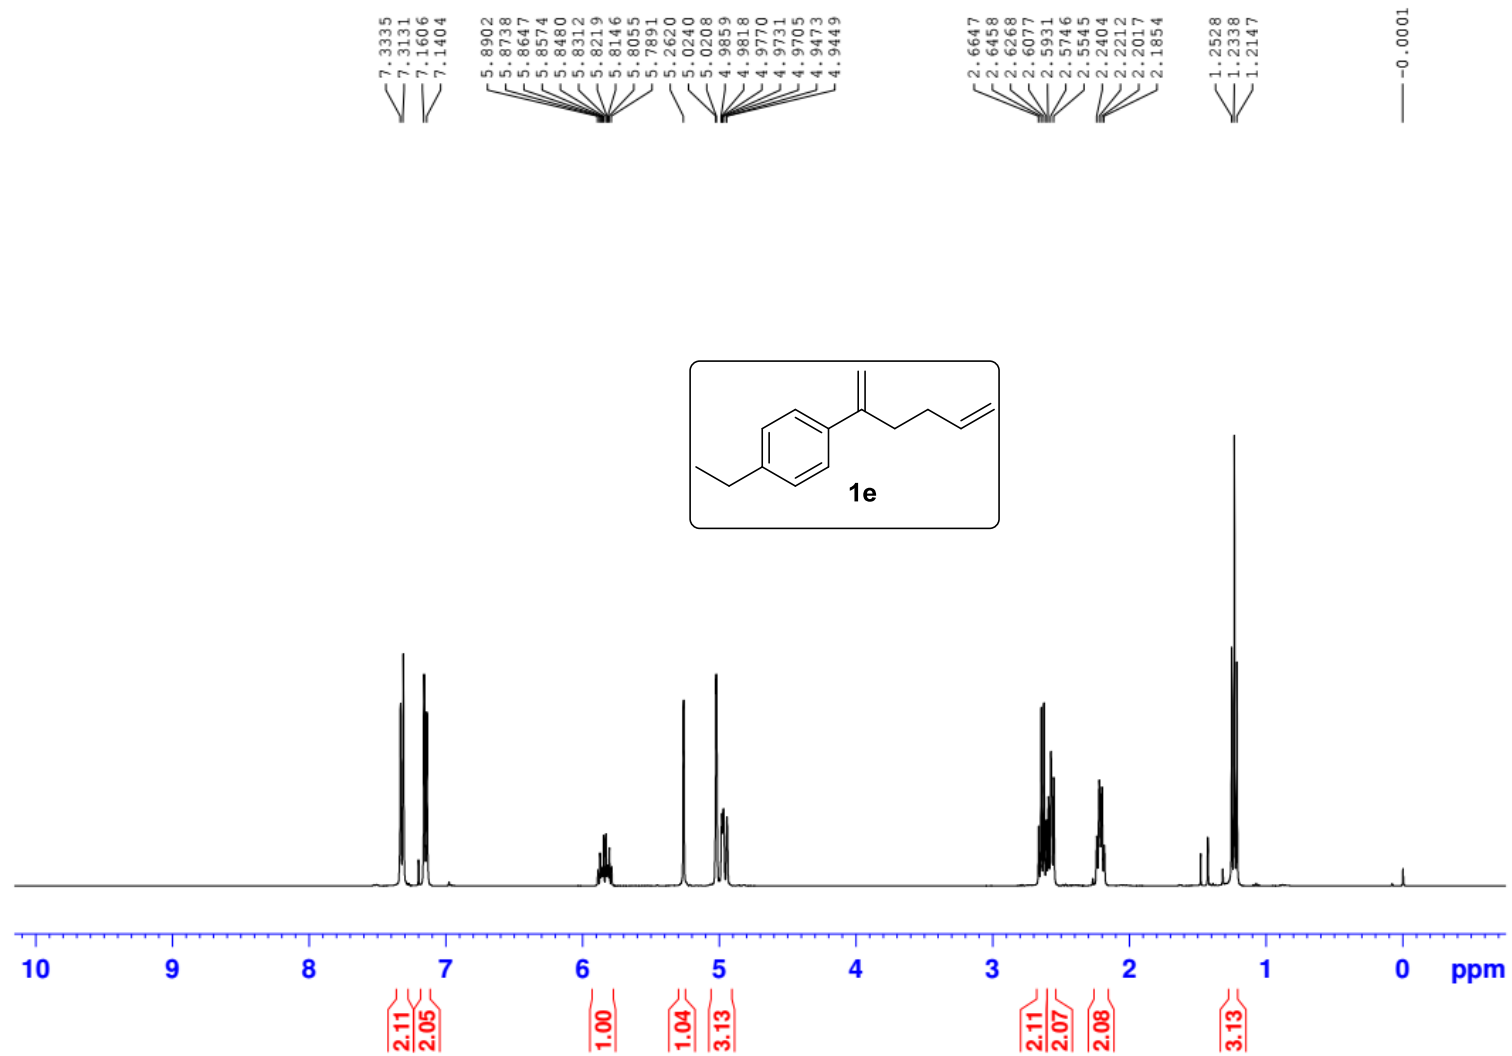

HY-X180124-5-CDC13-CNMR

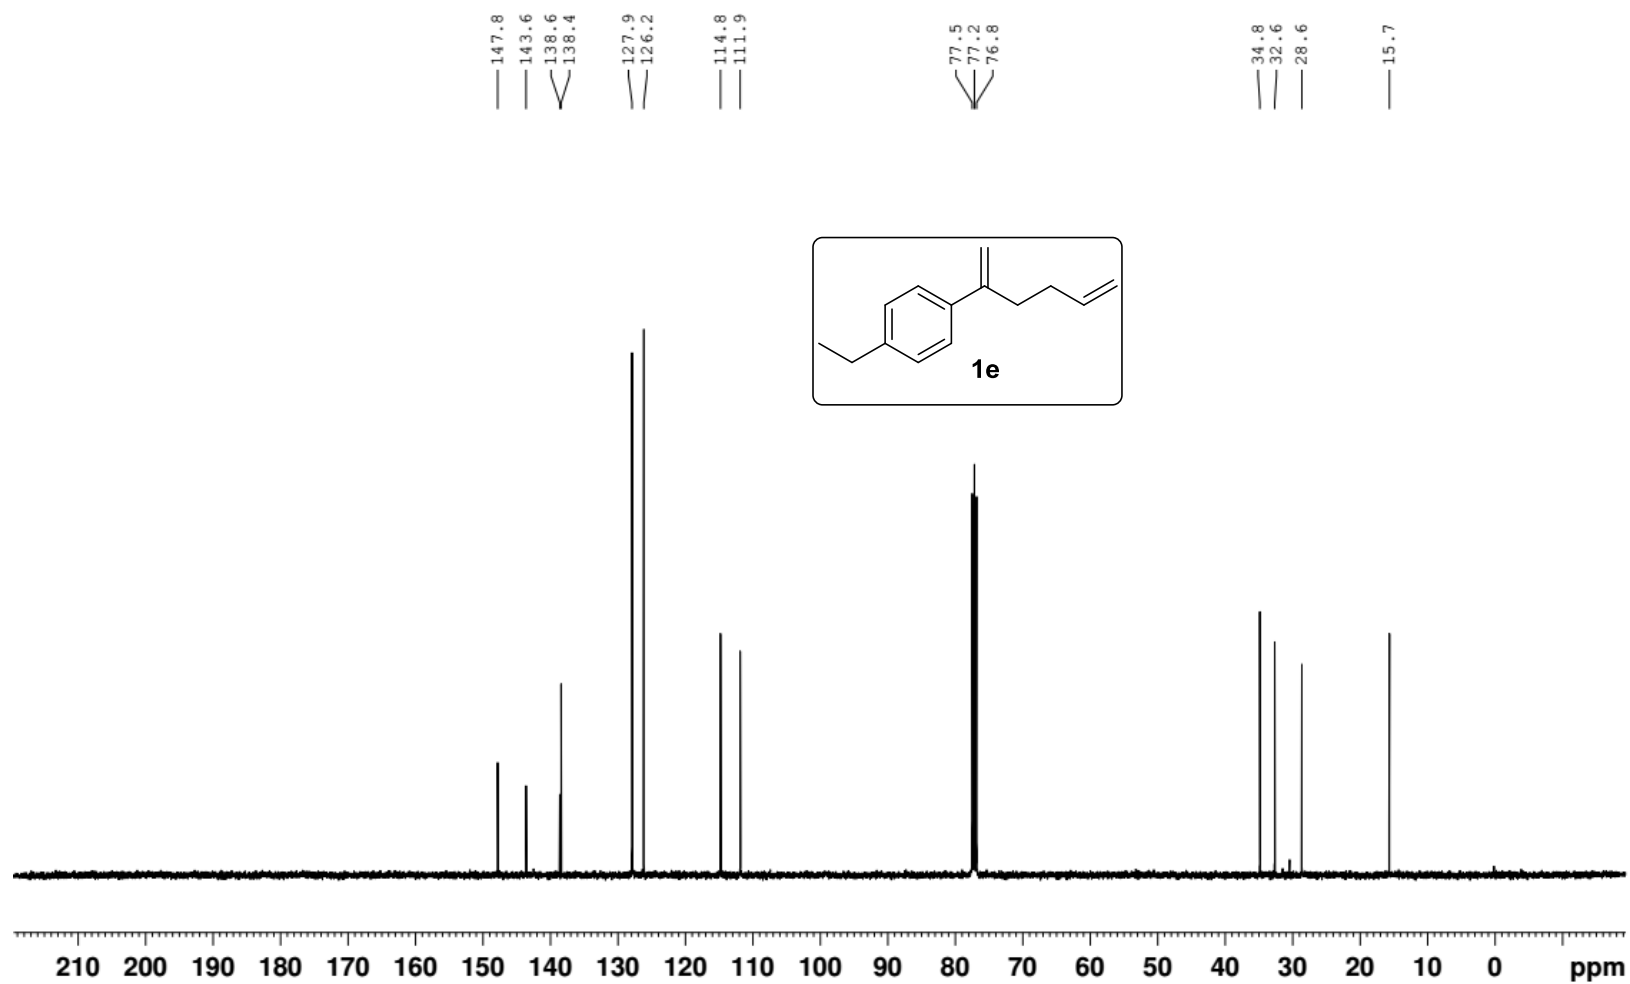



HY-X180124-3-CDCl<sub>3</sub>-HNMR

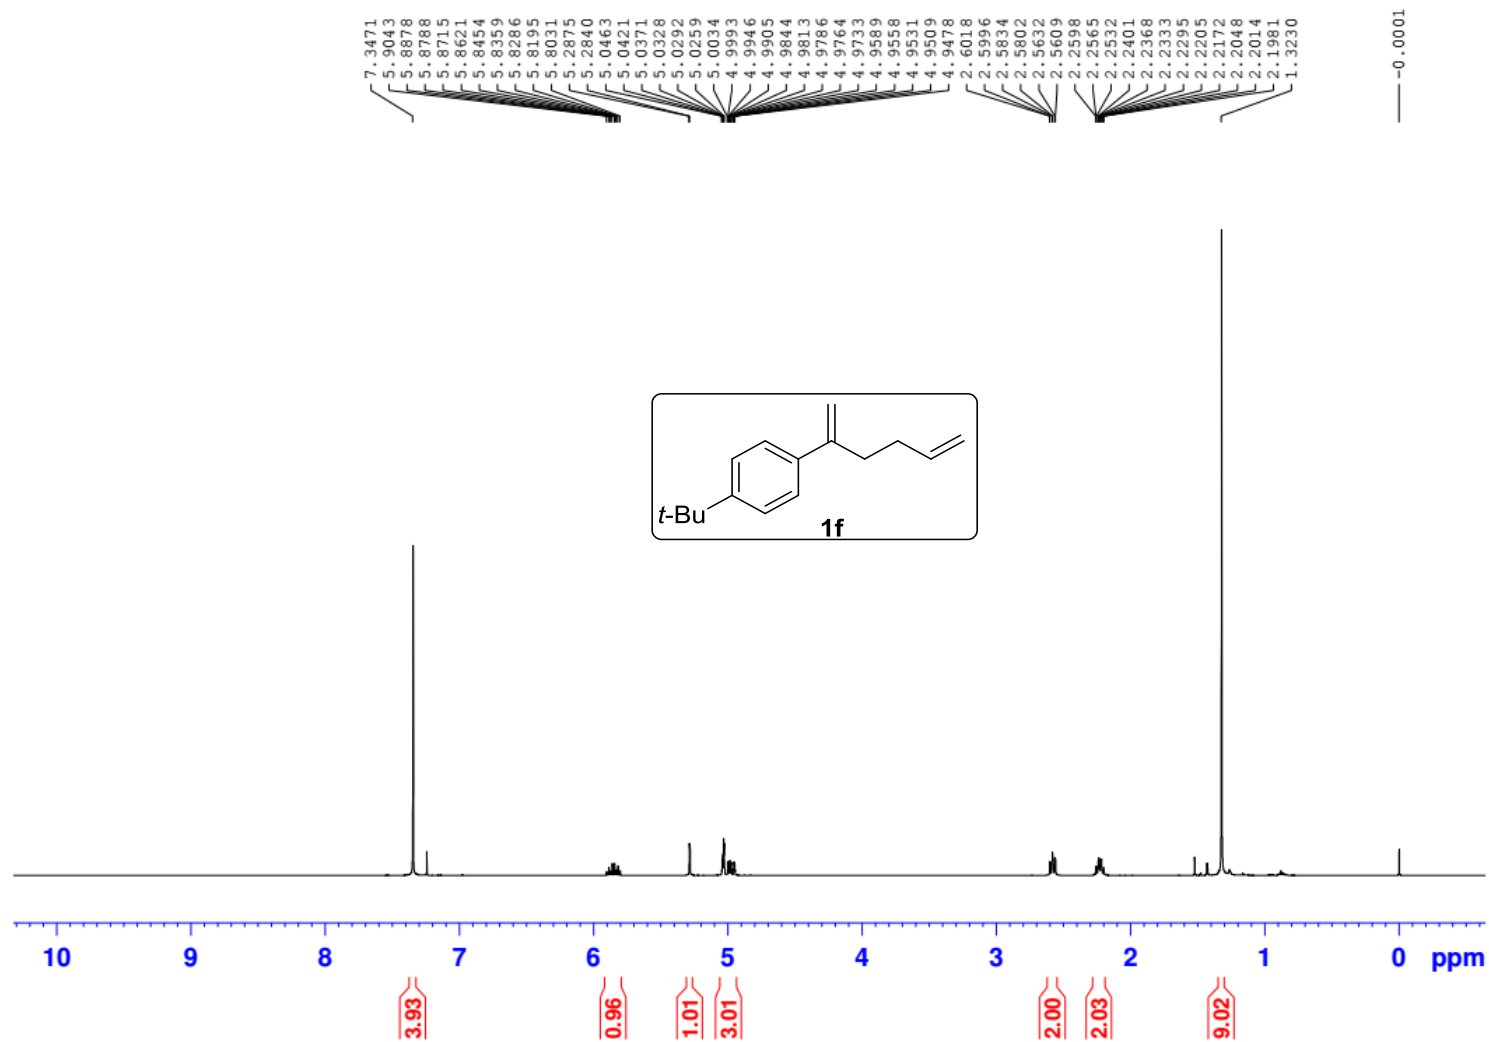

HY-X180124-3-CDC13-CNMR

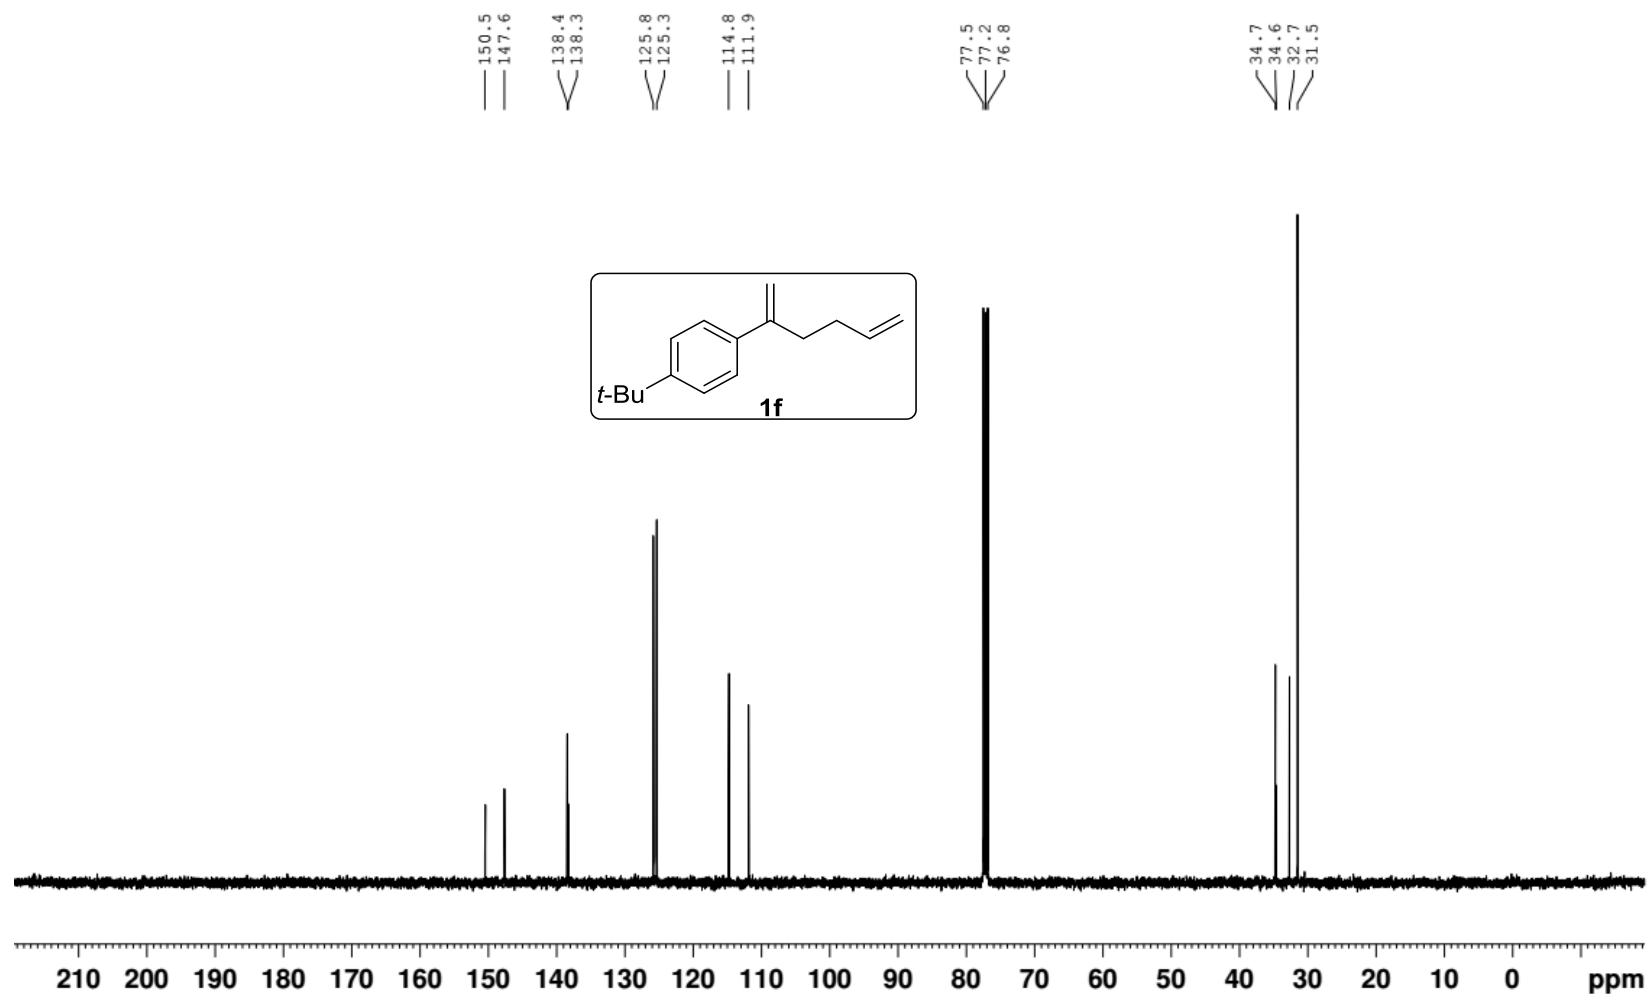

HY-X180124-4-CDC13-HNMR

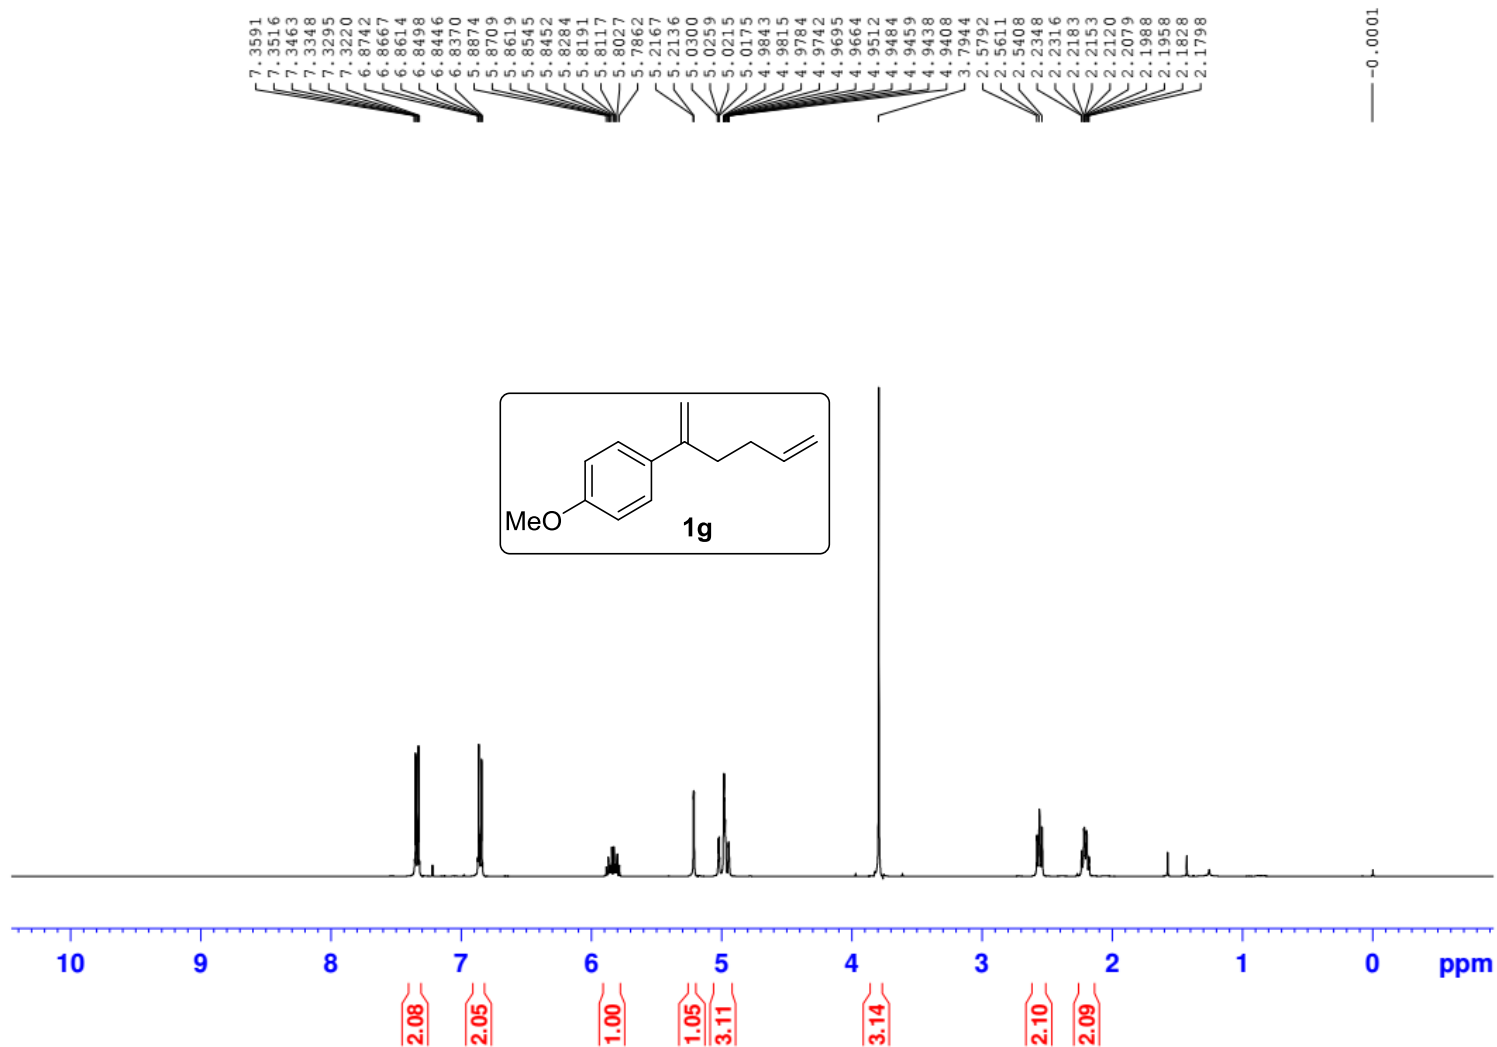

HY-X180124-4-CDCl<sub>3</sub>-CNMR

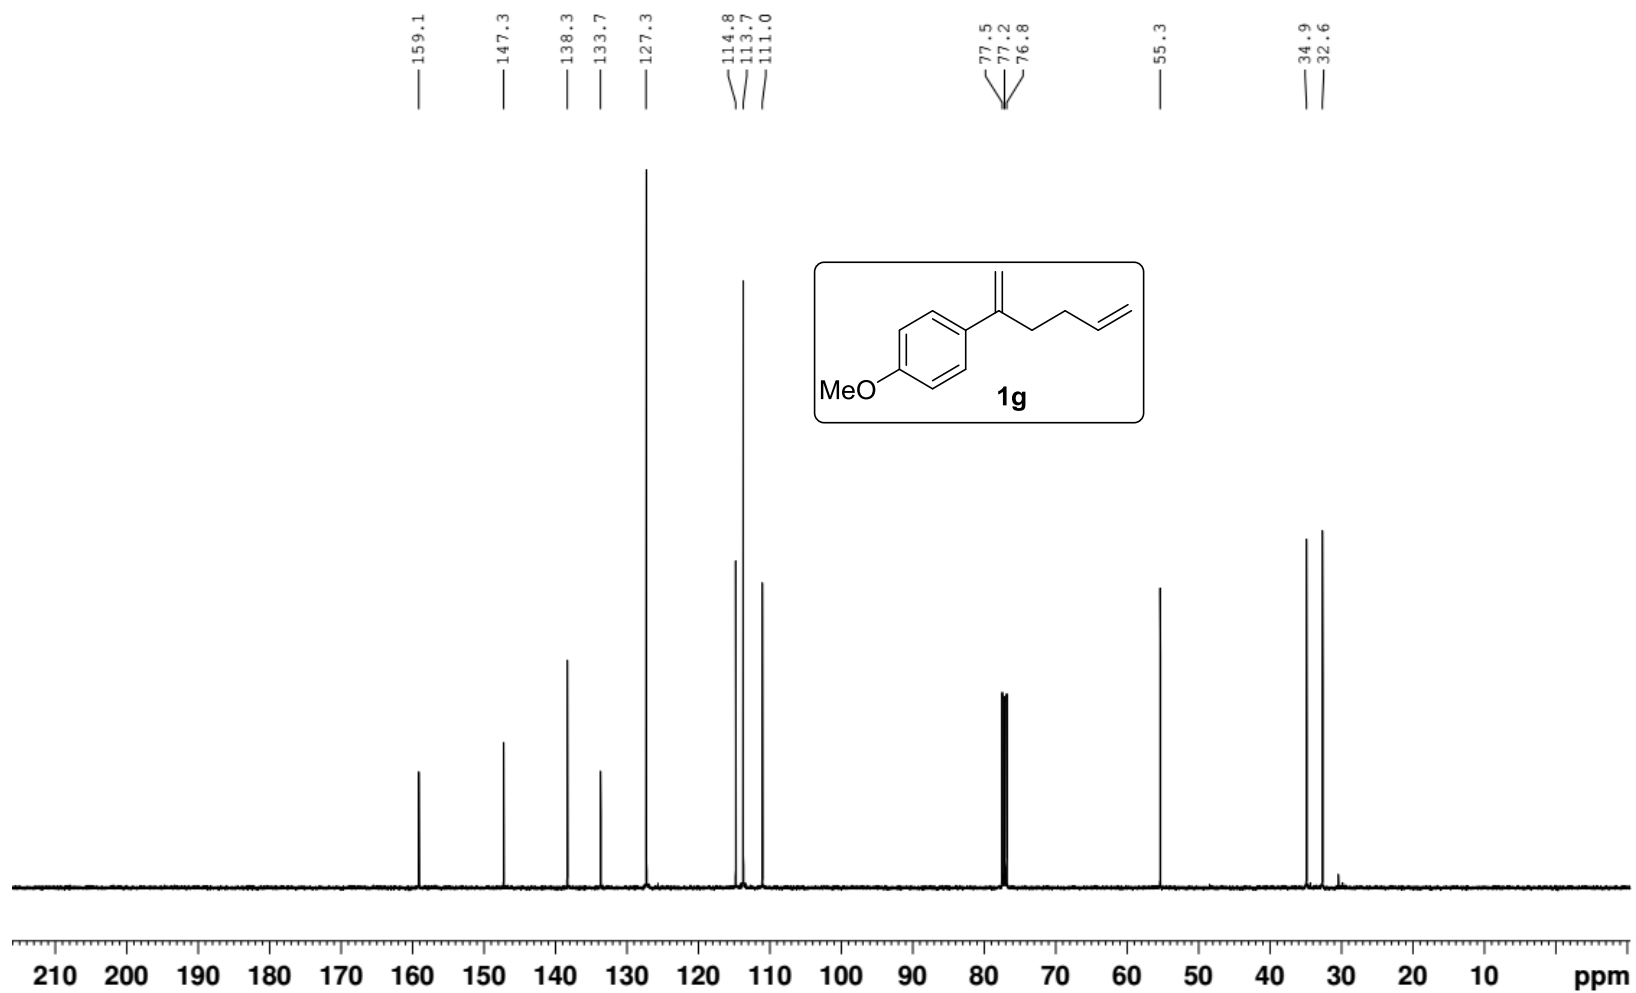

HY-X180424-4-CDC13-HNMR

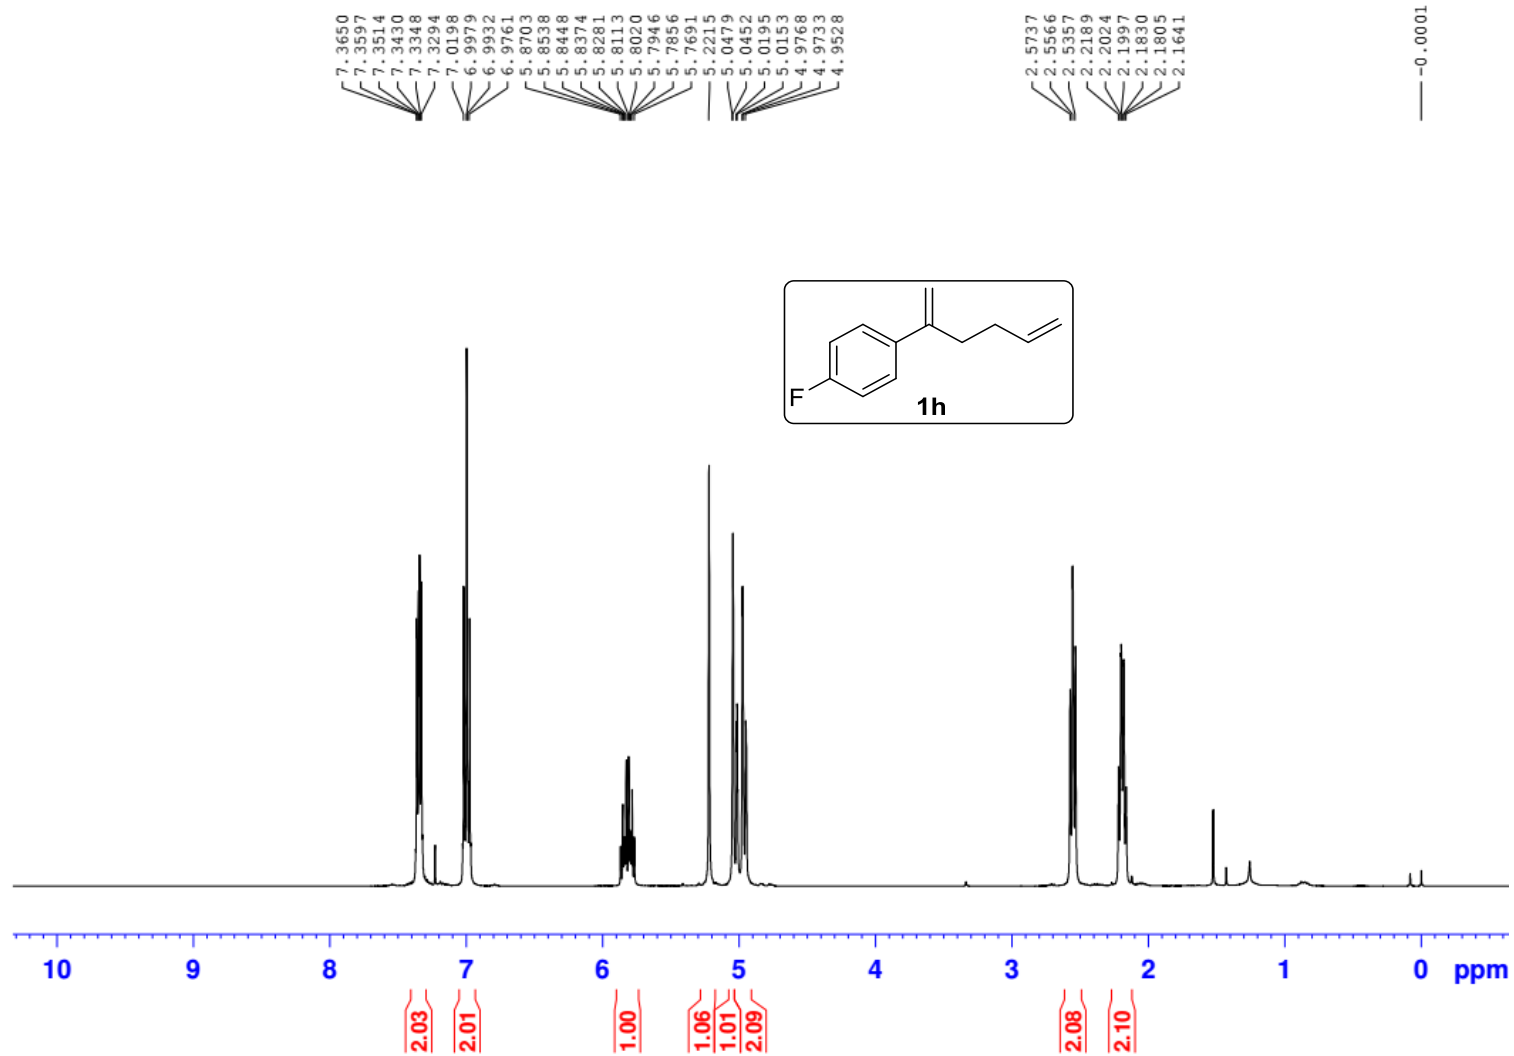

HY-X180424-4-CDC13-CNMR

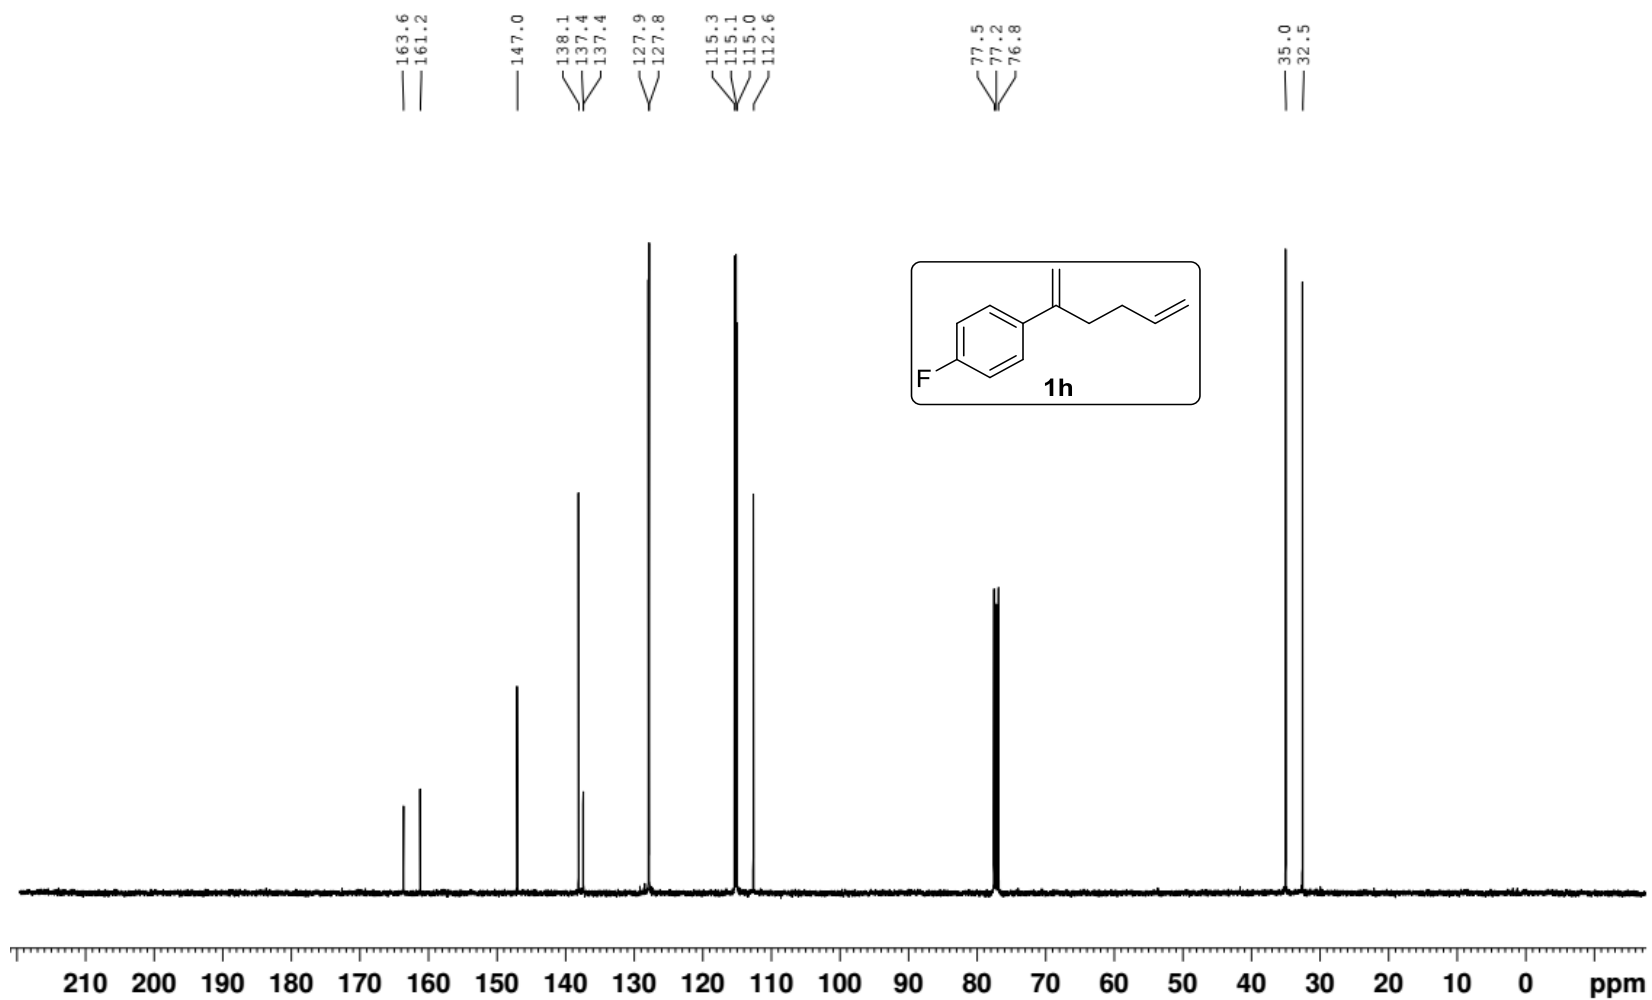

HY-X180424-4-CDC13-FNMR

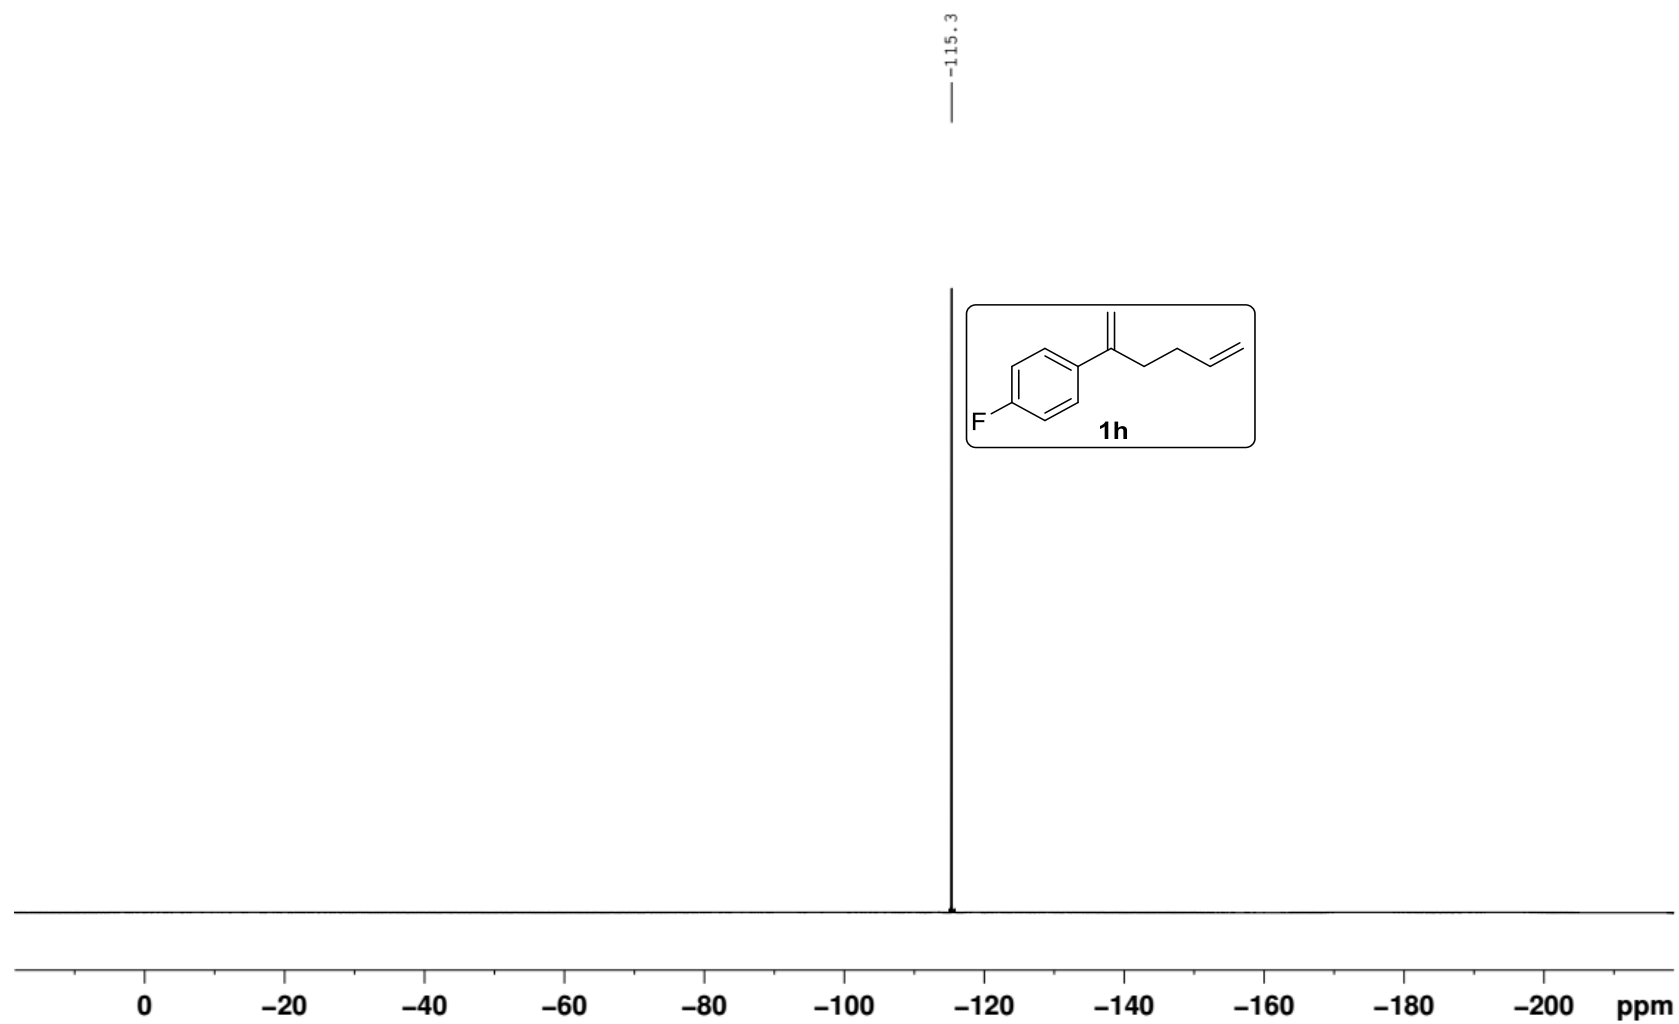

HY-X180124-1-CDCl<sub>3</sub>-HNMR

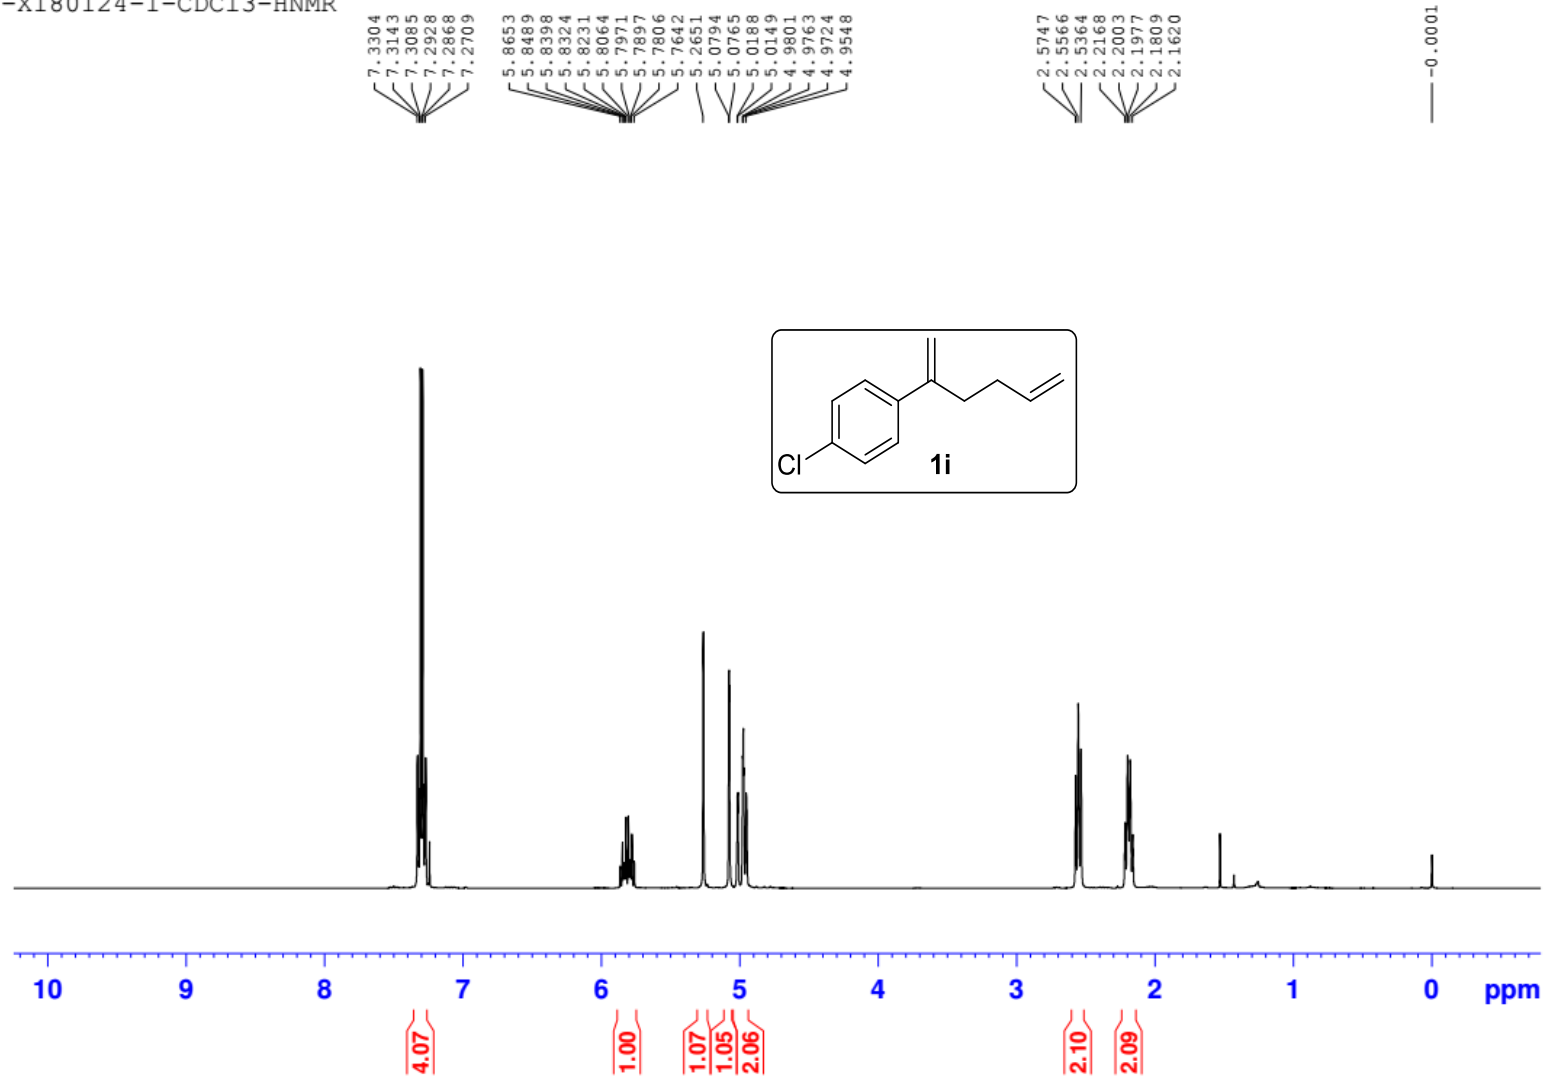



HY-X180124-1-CDC13-CNMR

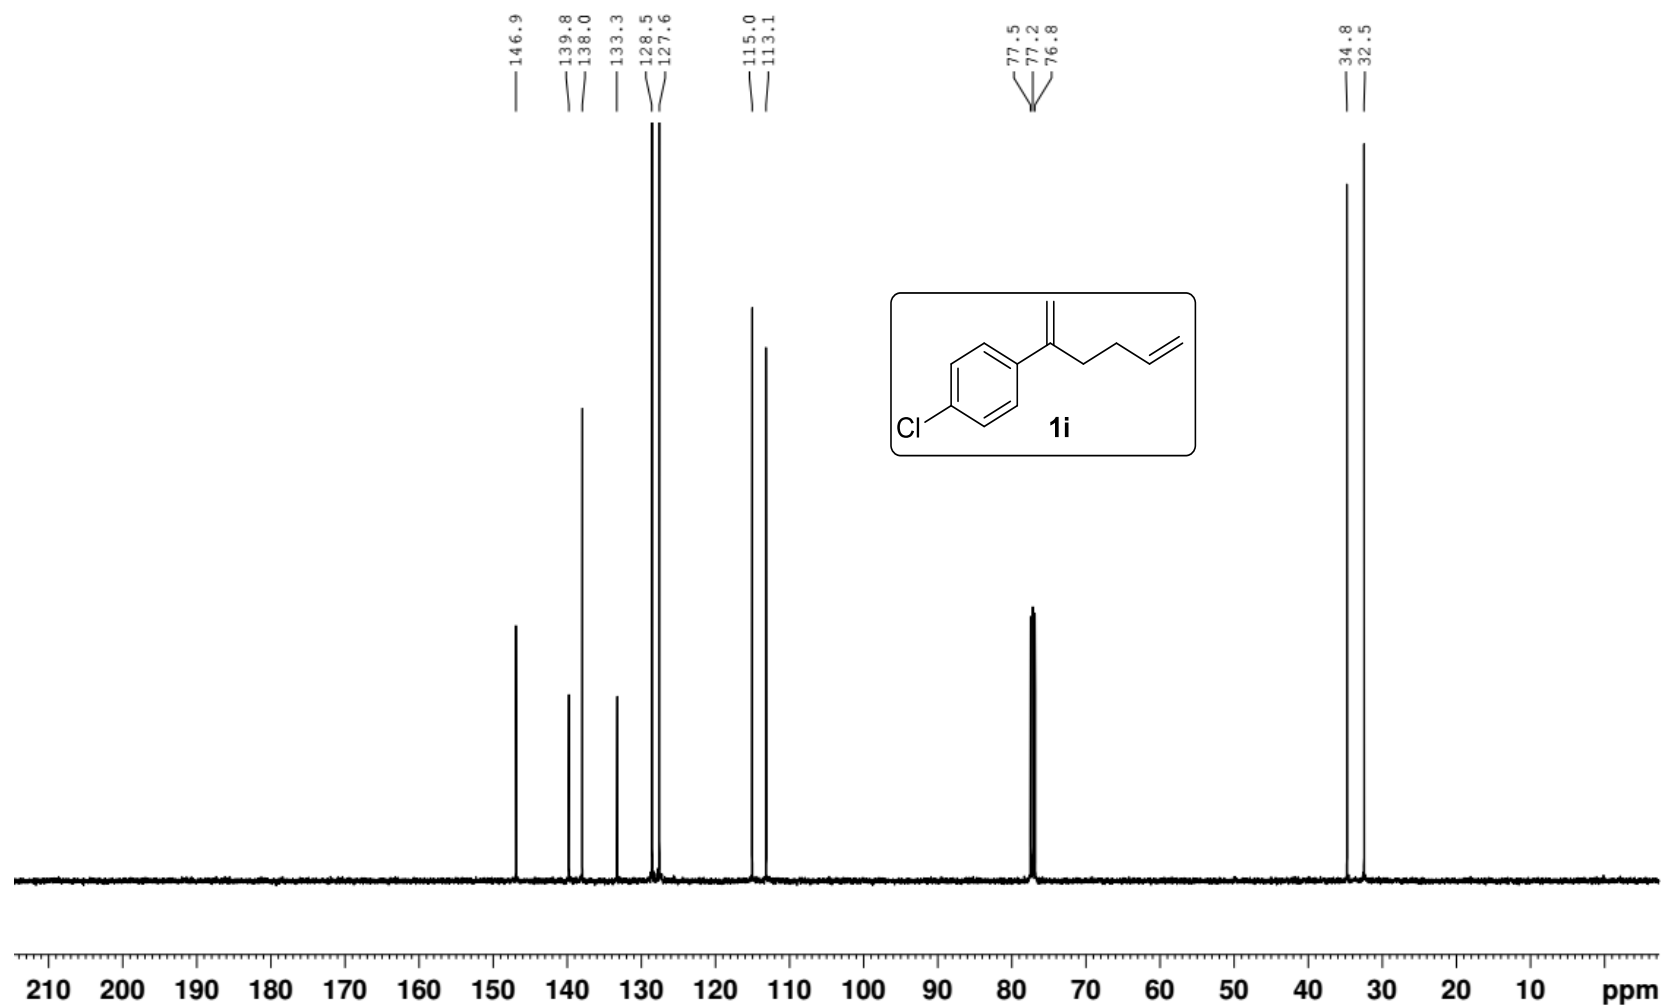

HY-X180124-2-CDCl<sub>3</sub>-HNMR

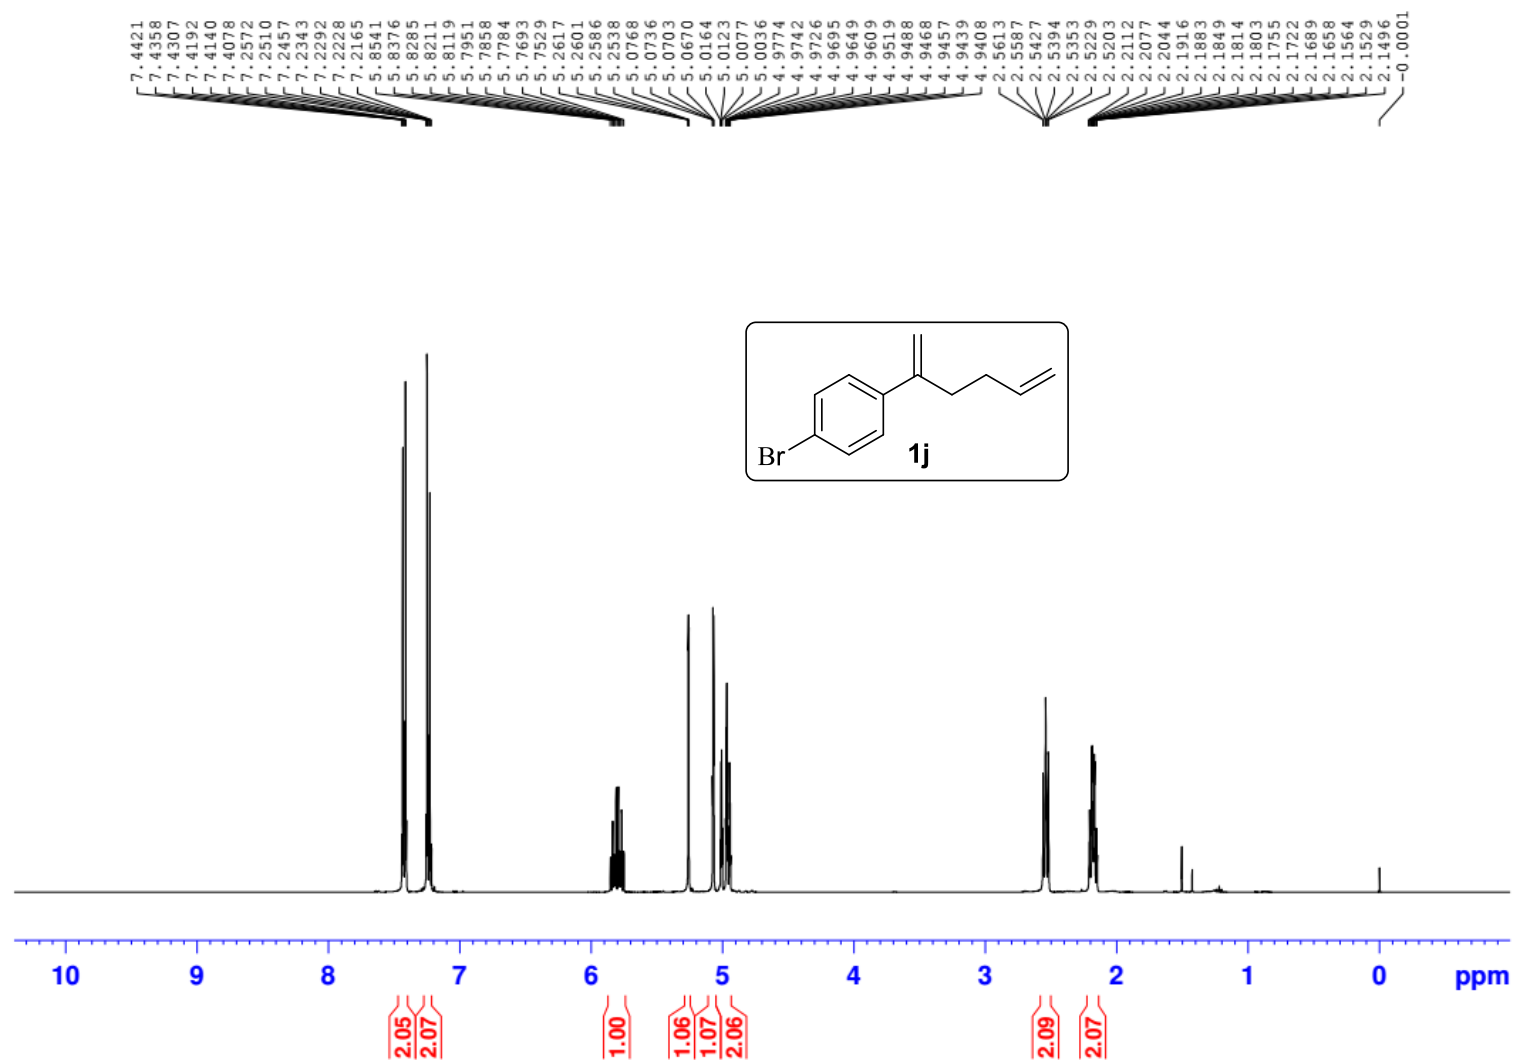

HY-X180124-2-CDC13-CNMR

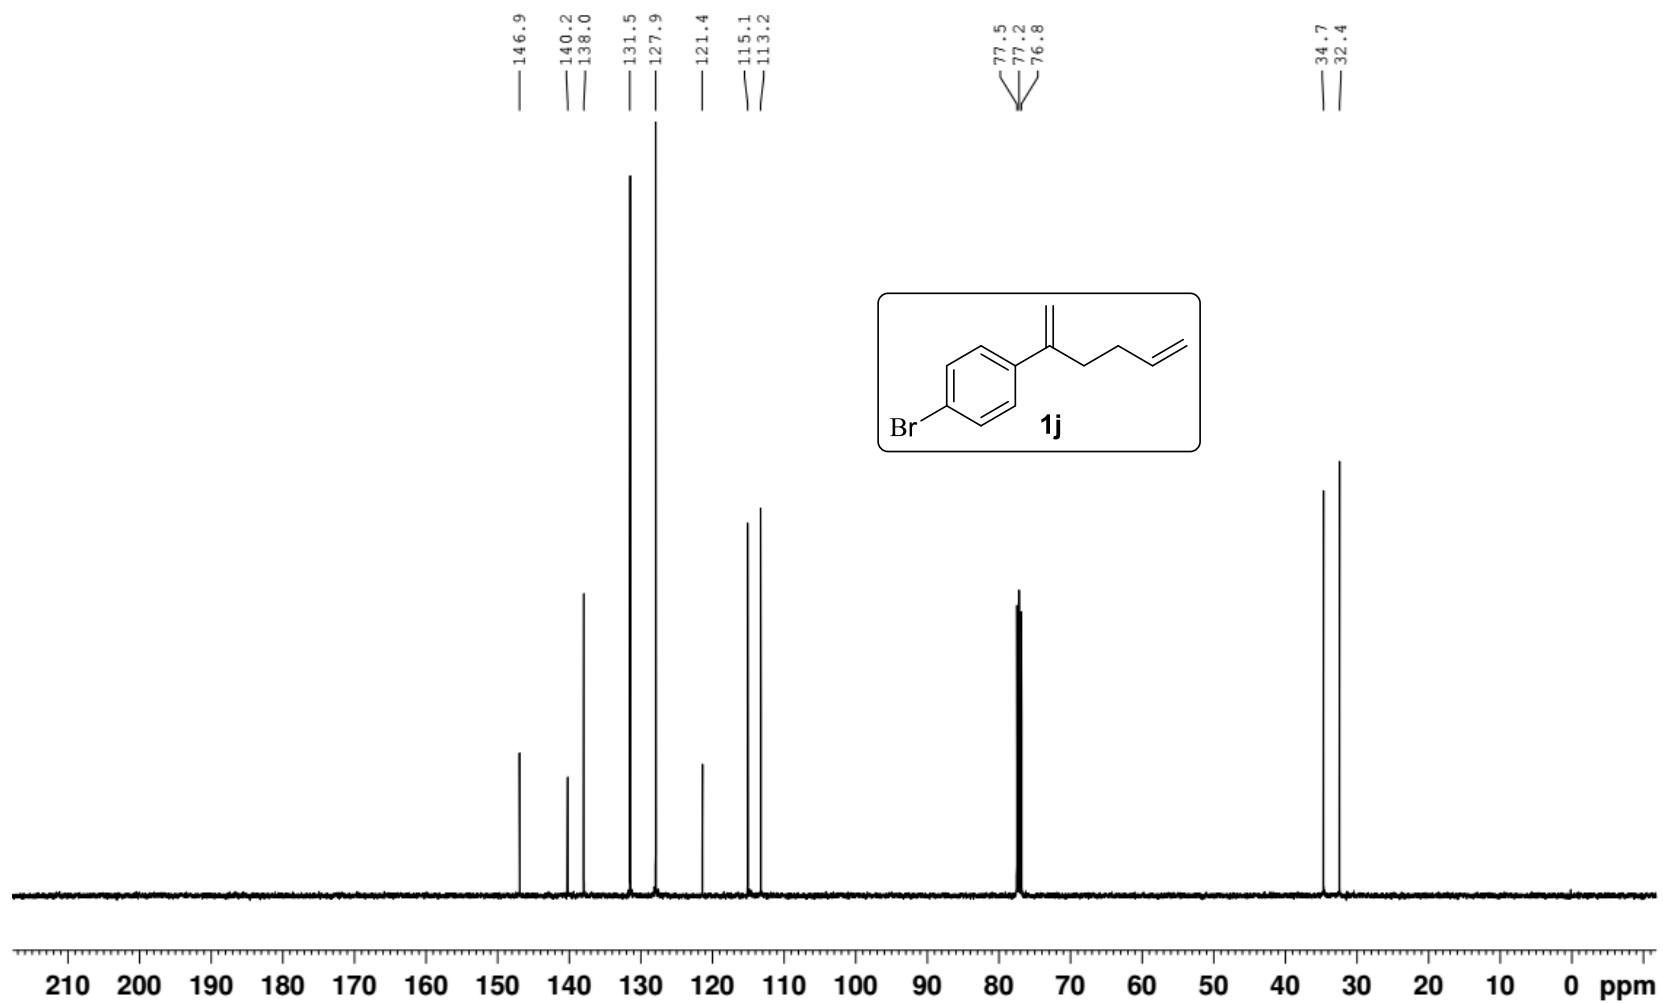

HY-X180424-1-CDCl<sub>3</sub>-HNMR

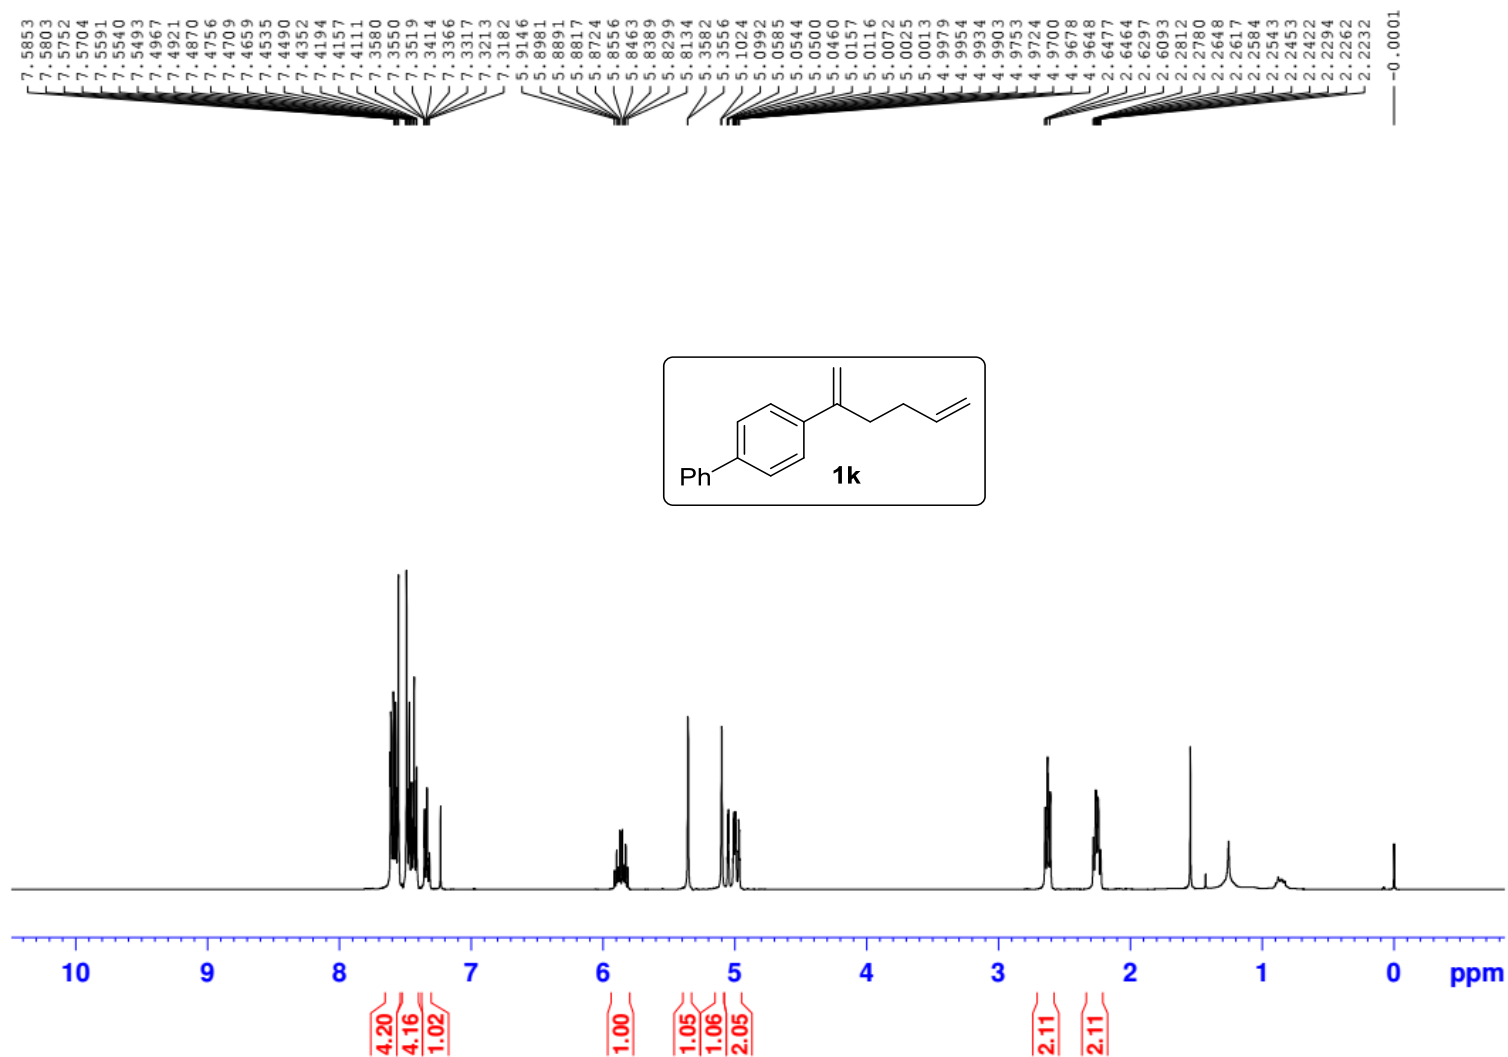

HY-X180424-1-CDC13-CNMR

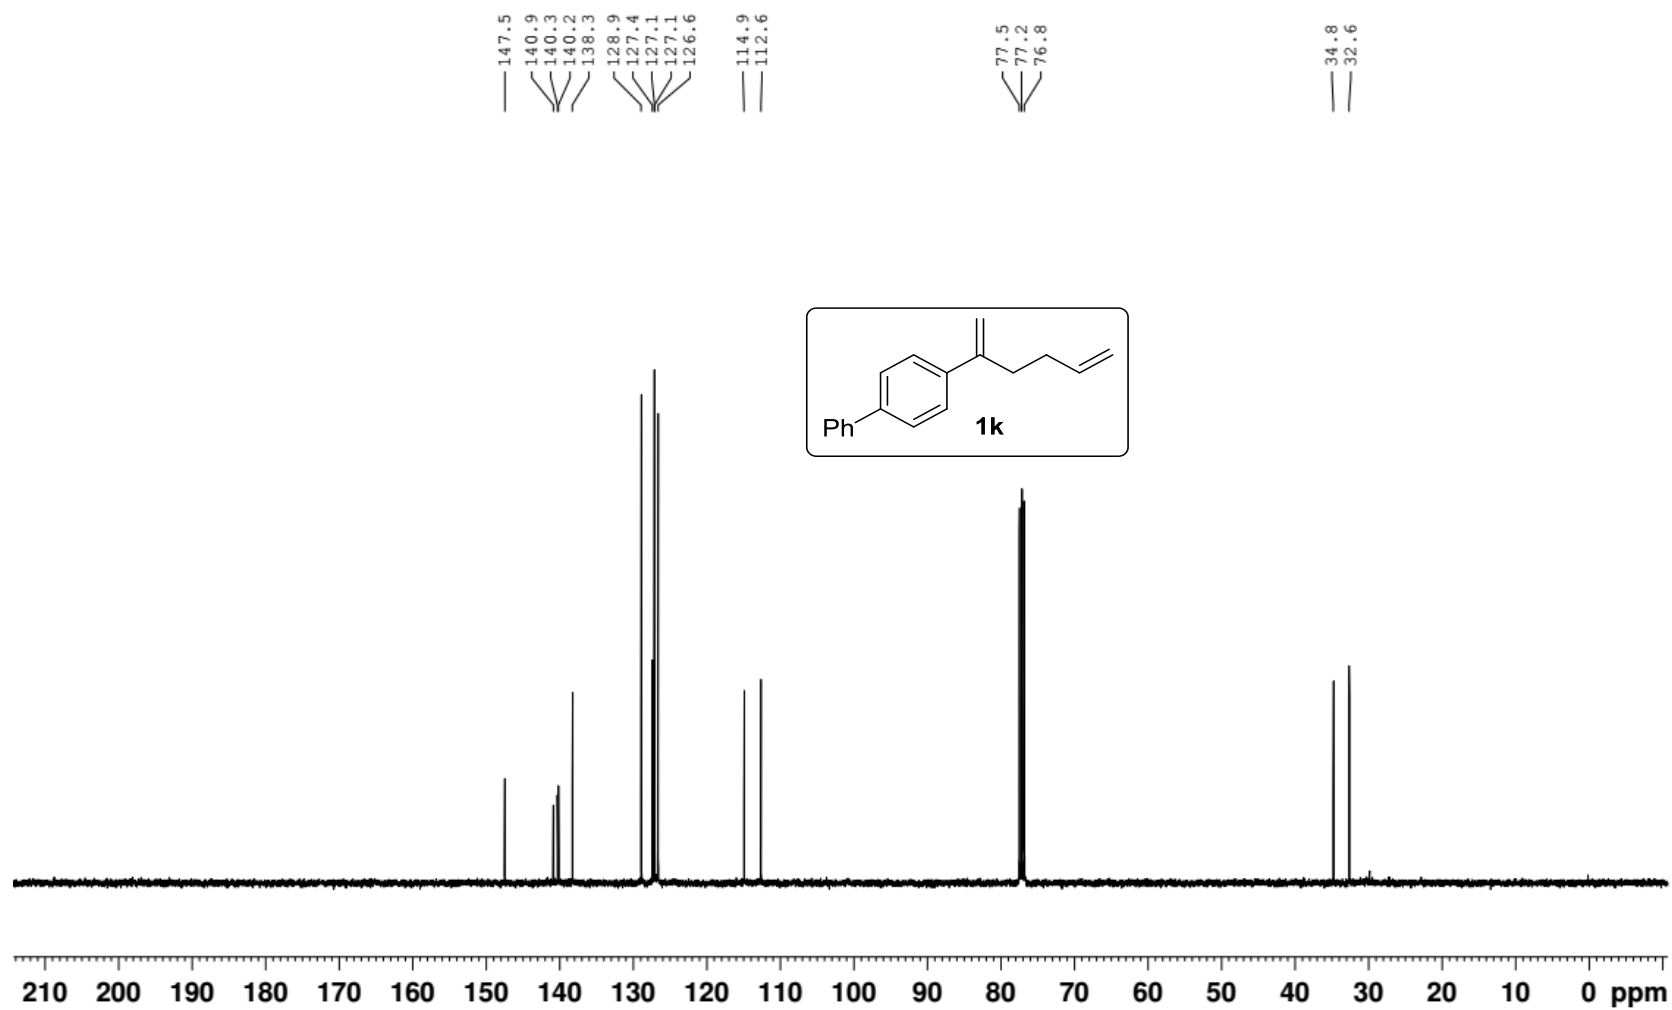

hy-x180326-2-1-CDC13-HNMR

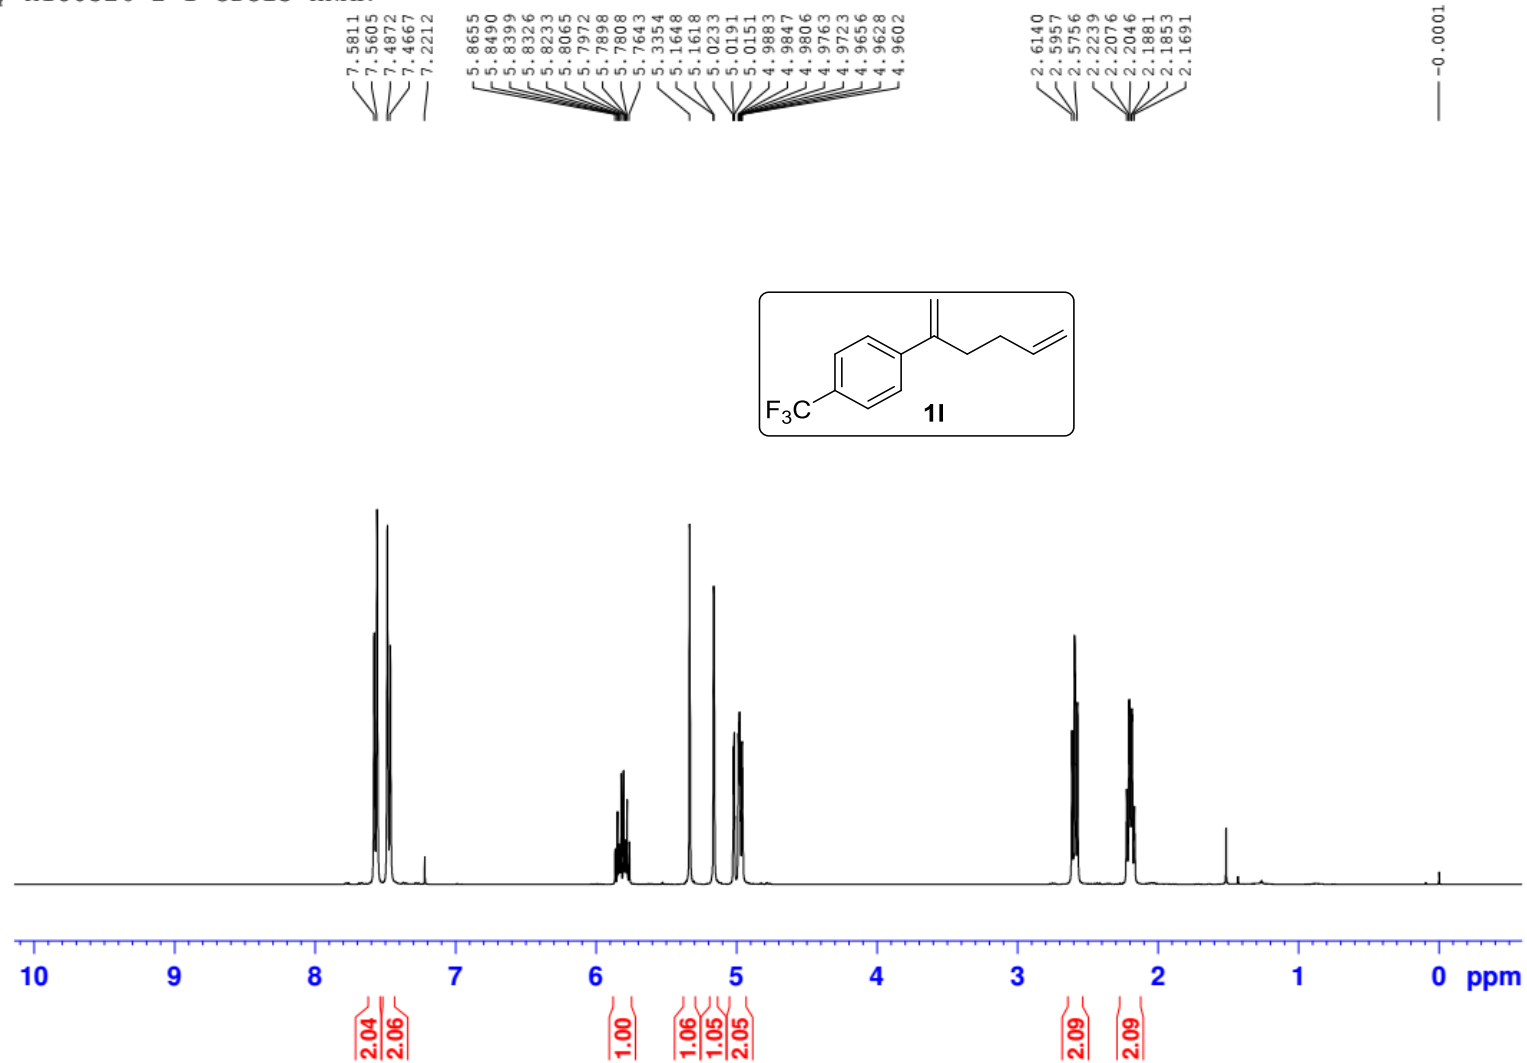

HY-X180326-2-1-CDC13-CNMR

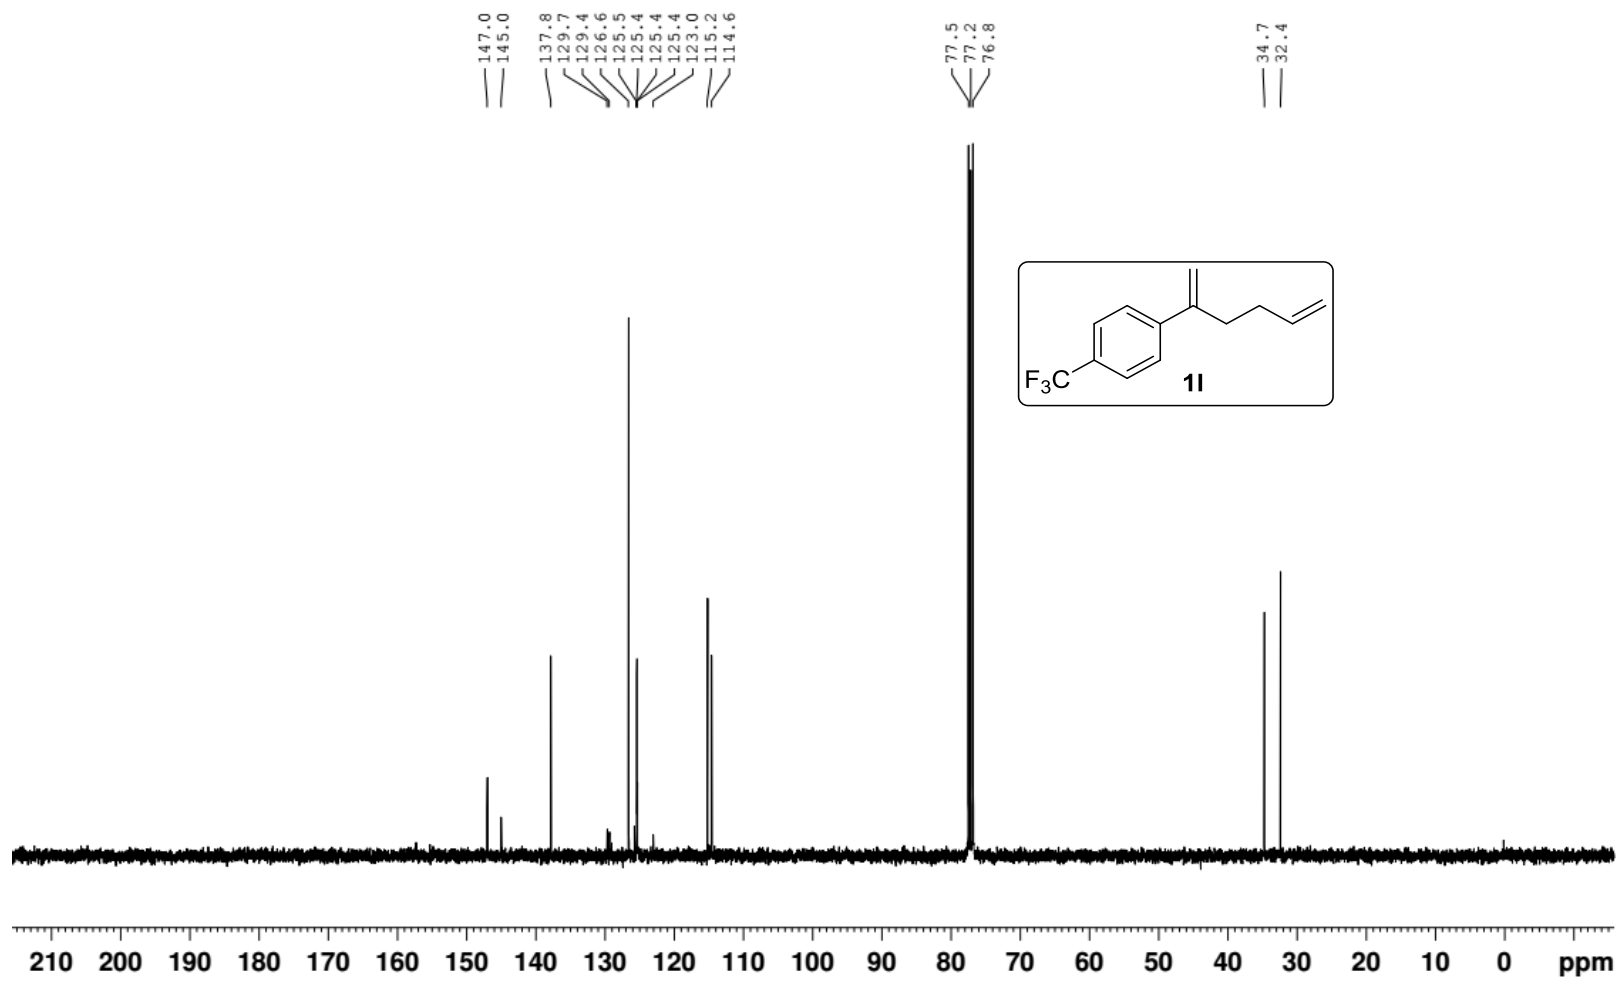

HY-X180326-2-1-CDC13-FNMR

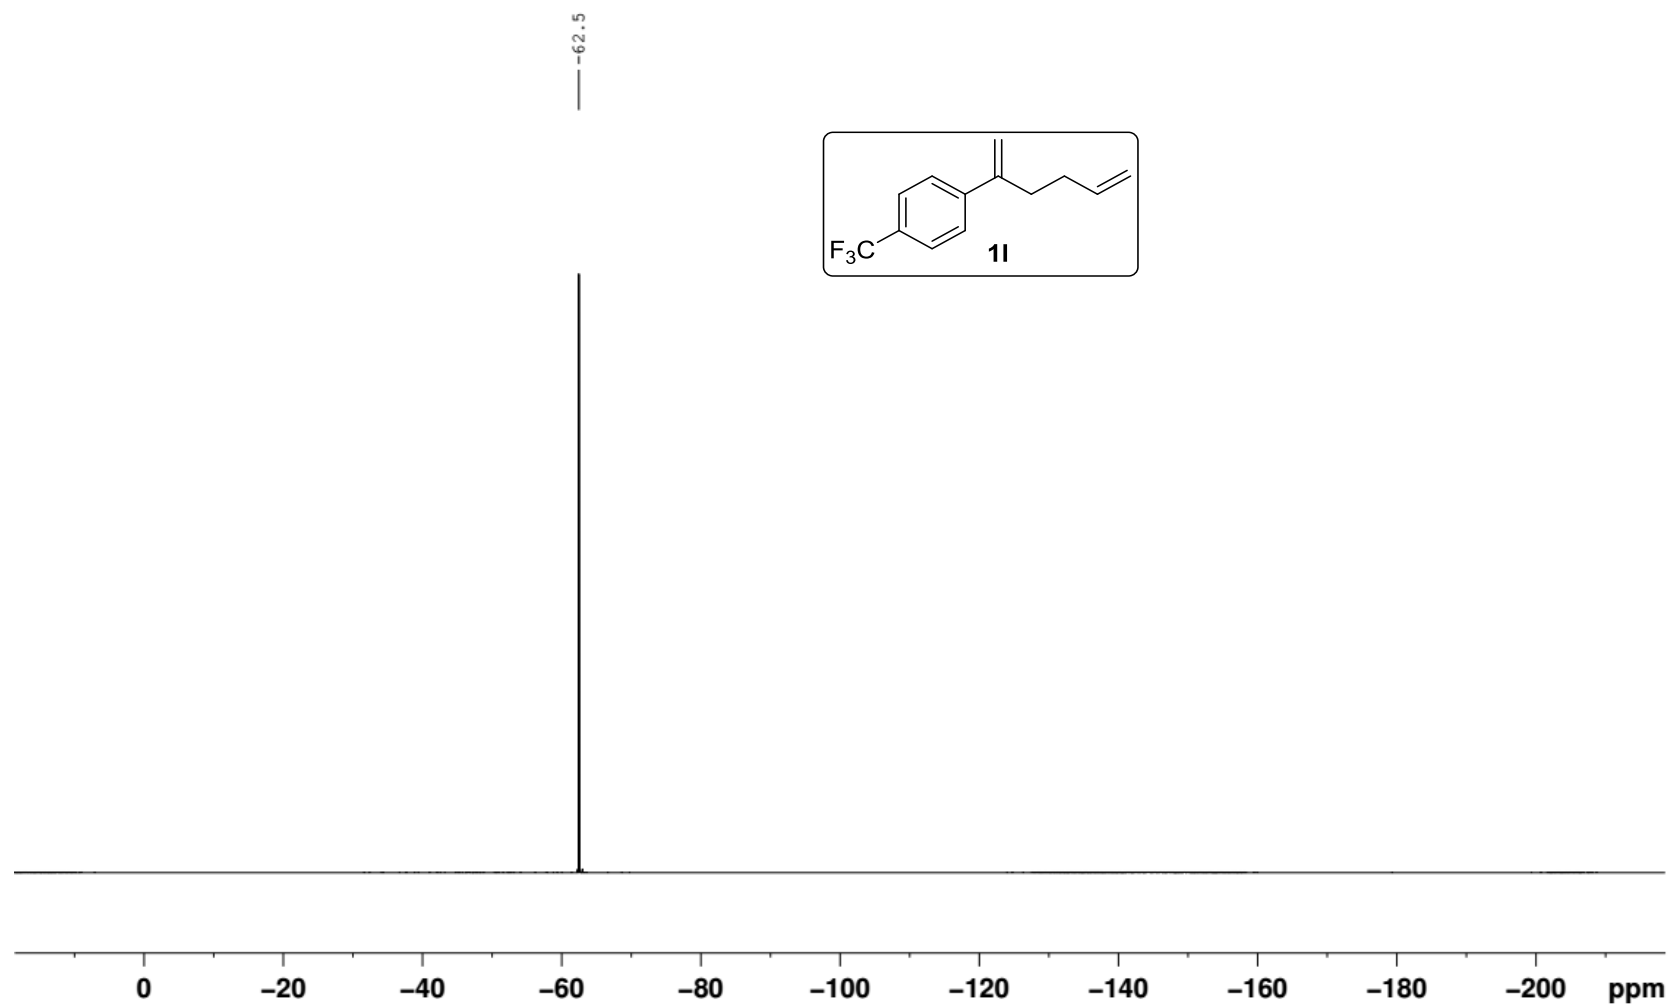



HY-X180321-1-CDCl3-HNMR

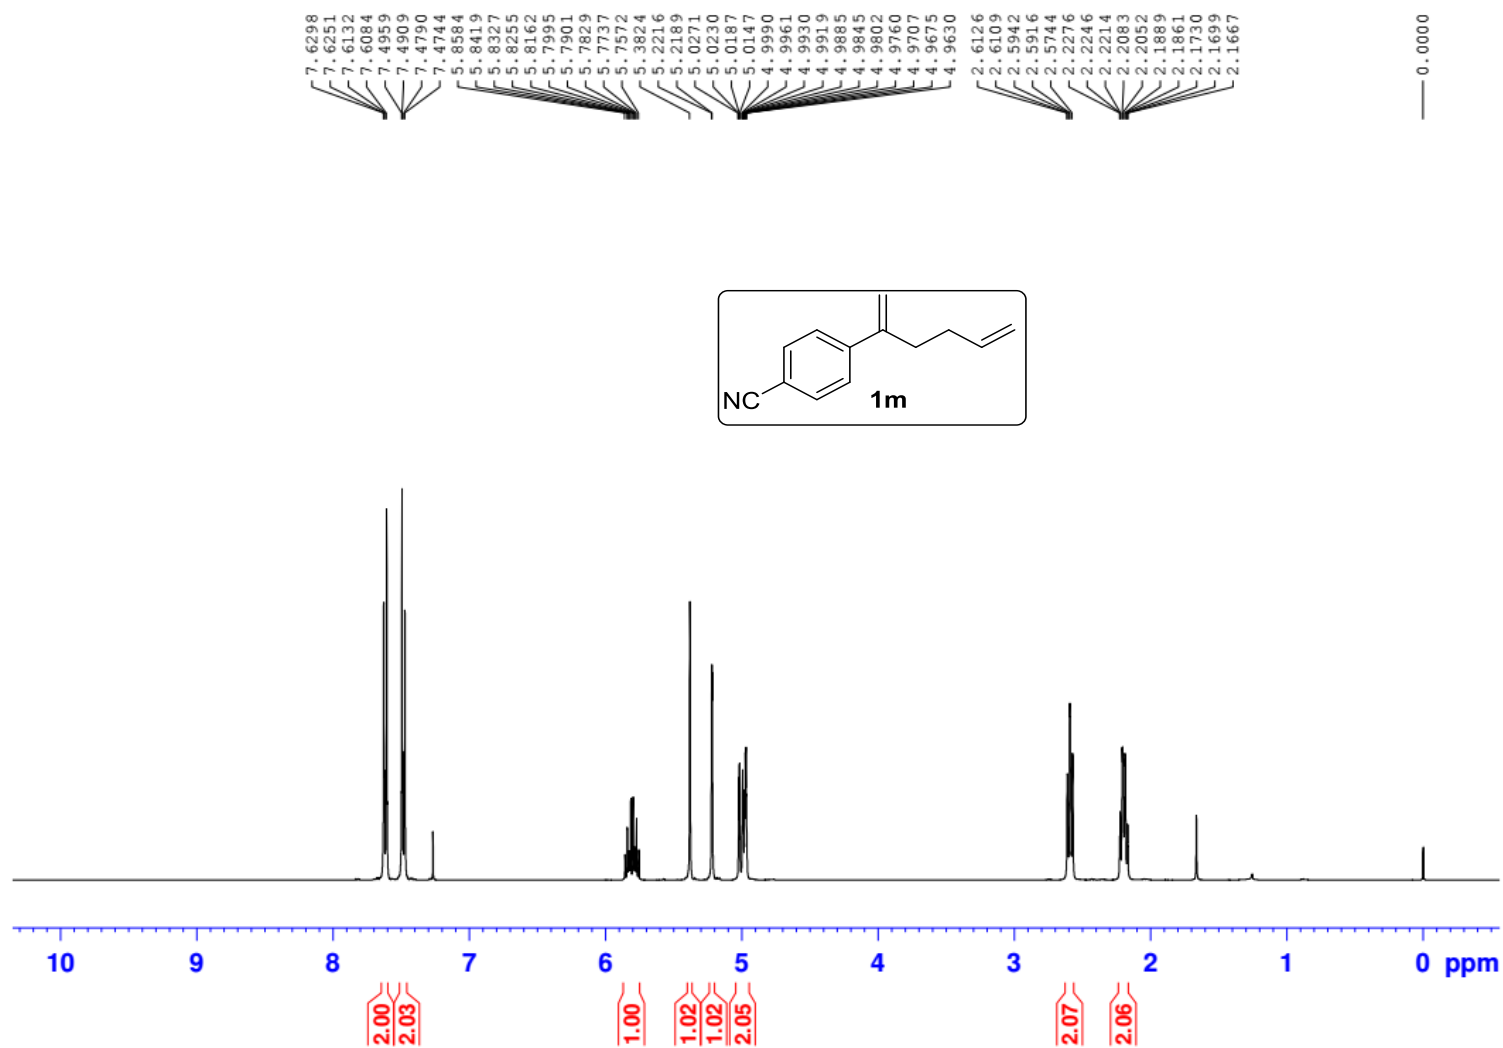

HY-X180321-1-CDC13-CNMR

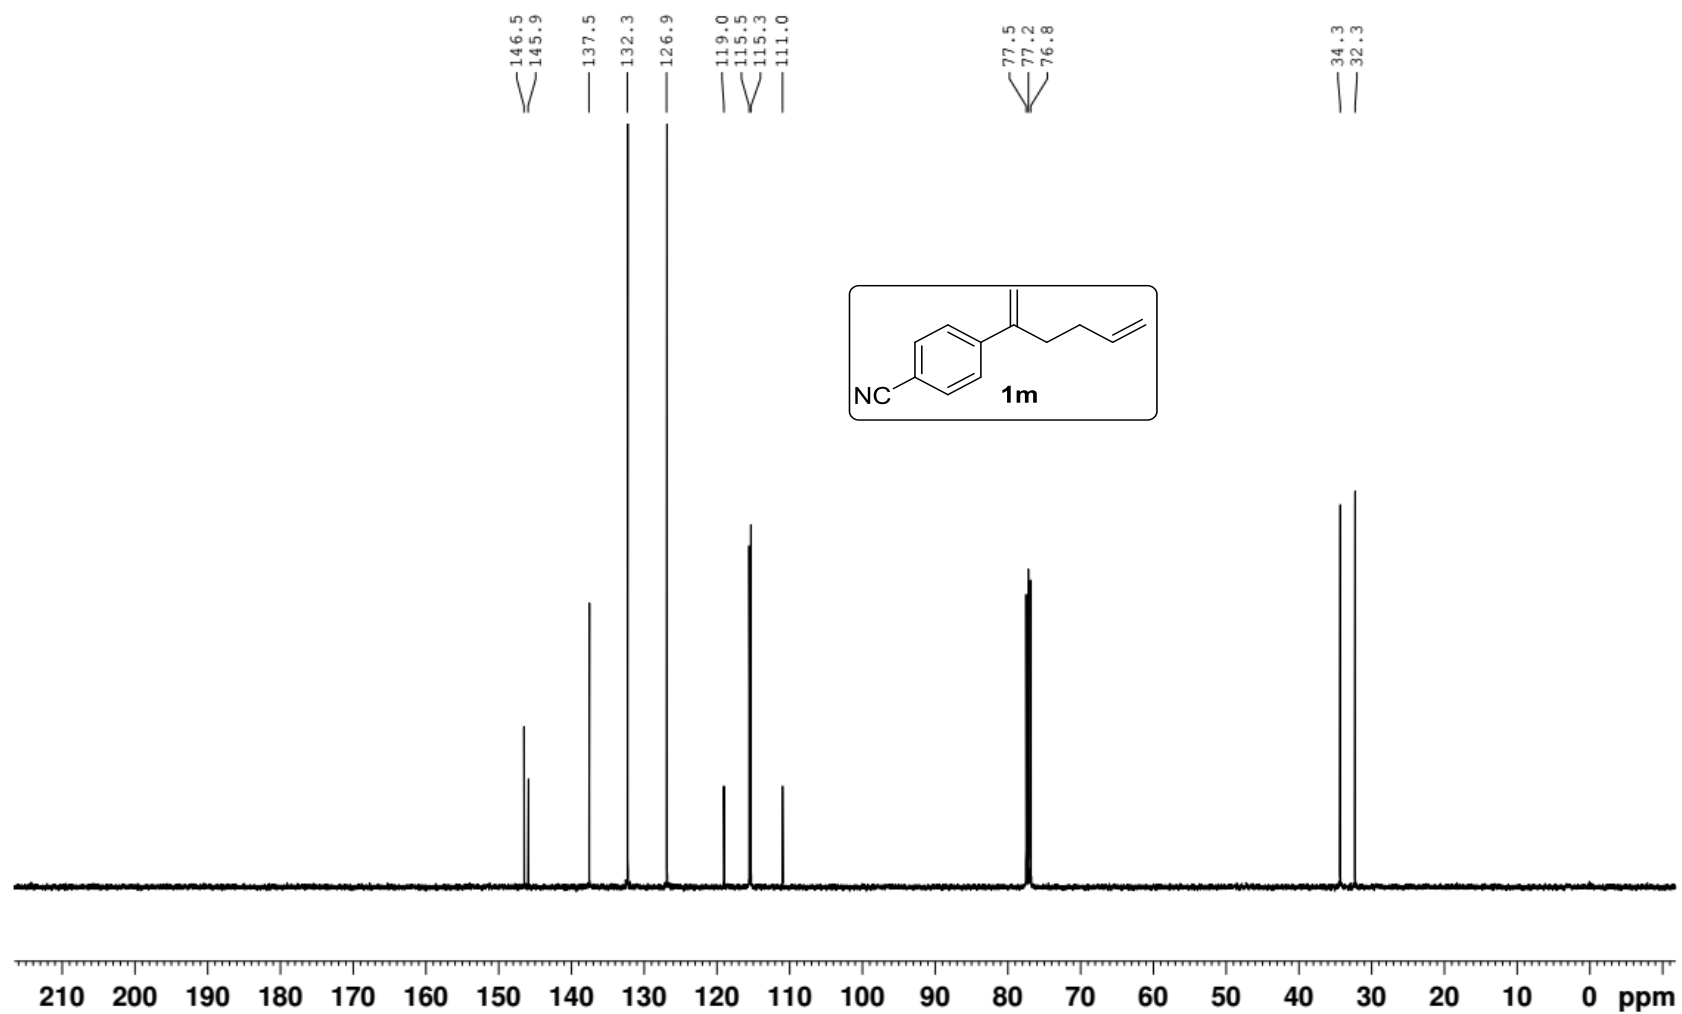

HY-X180408-1-CDC13-HNMR

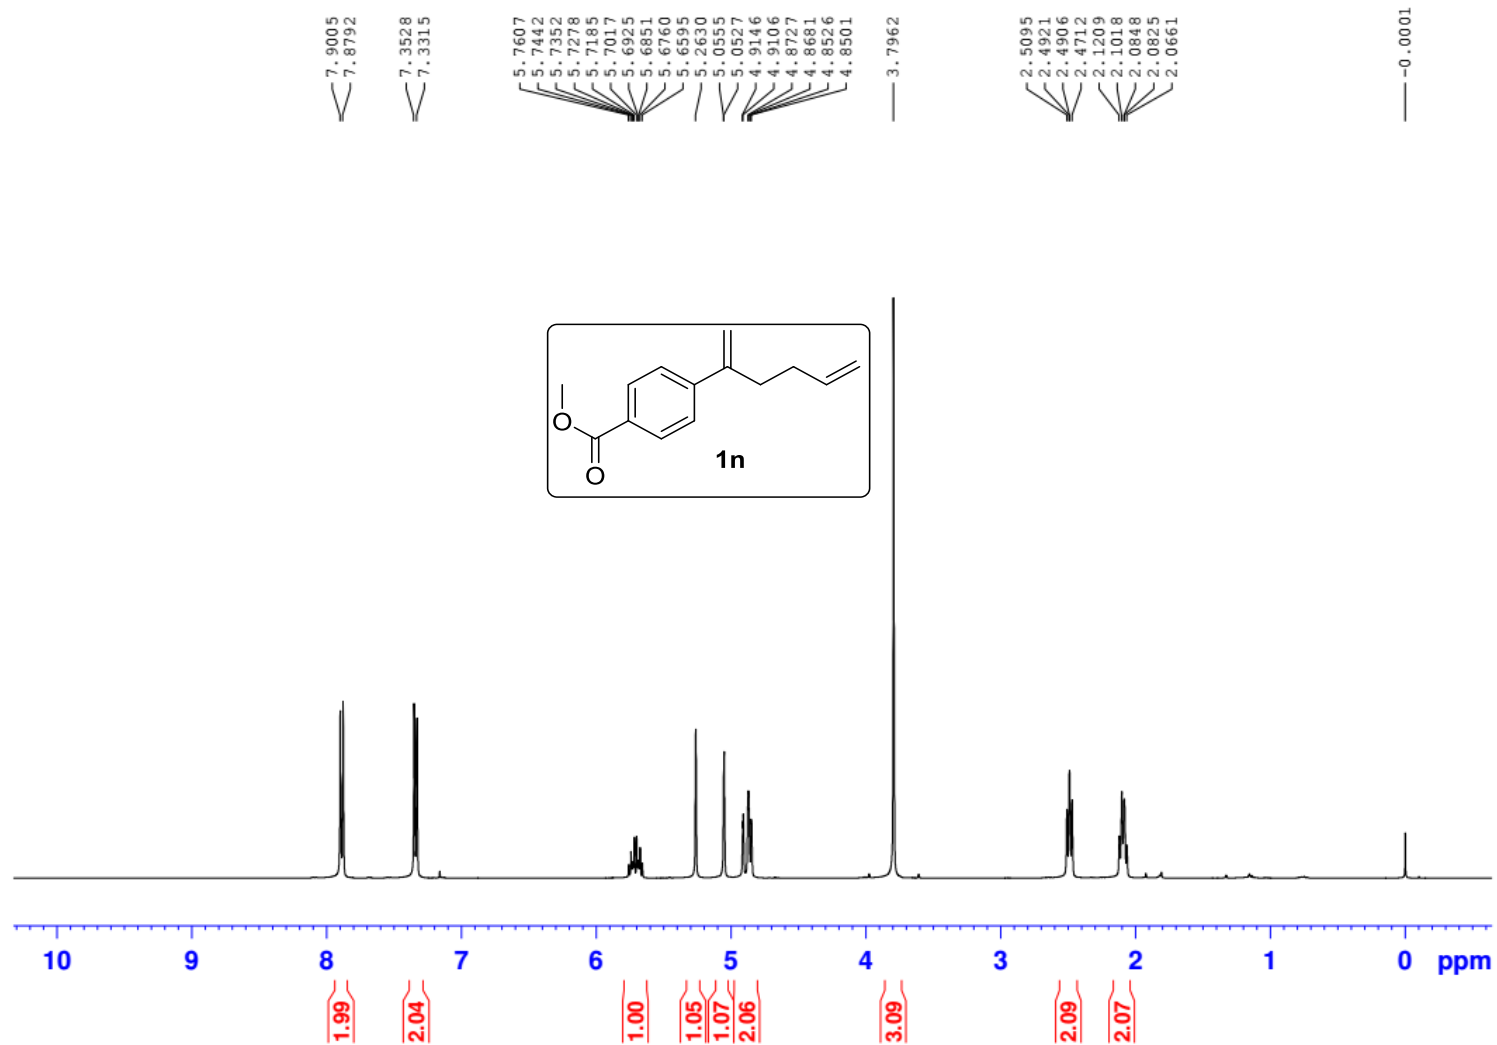

HY-X1800408-1-CDC13-CNMR

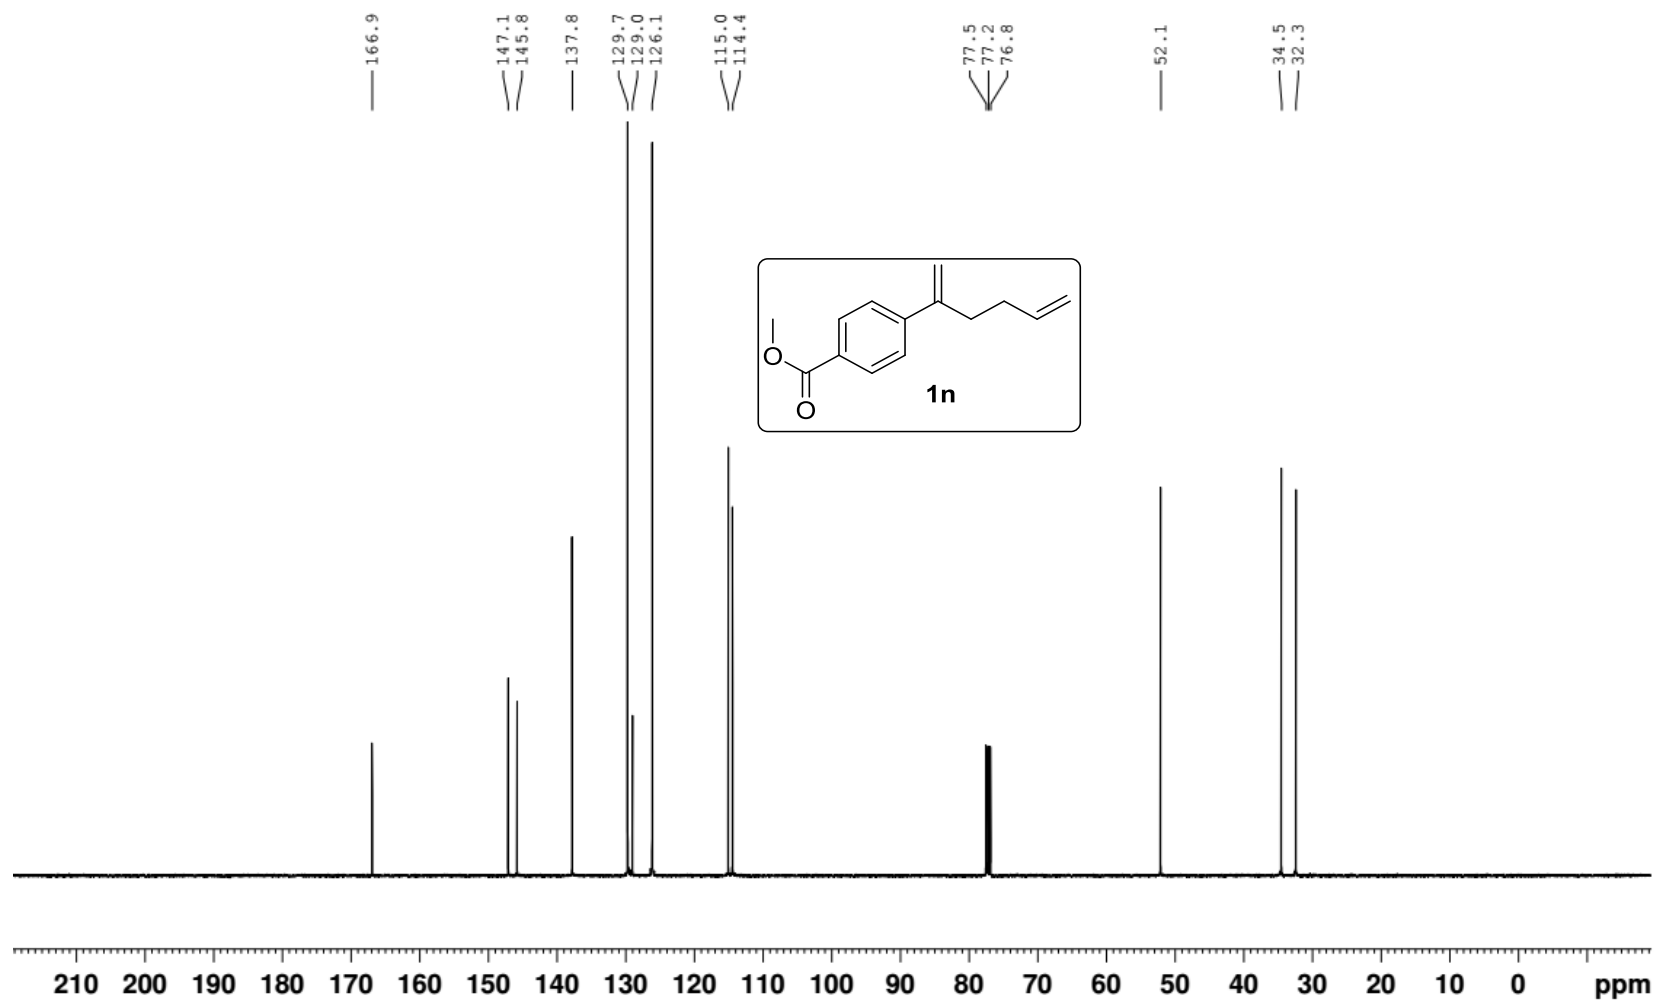

HY-X180226-1-CDC13-HNMR

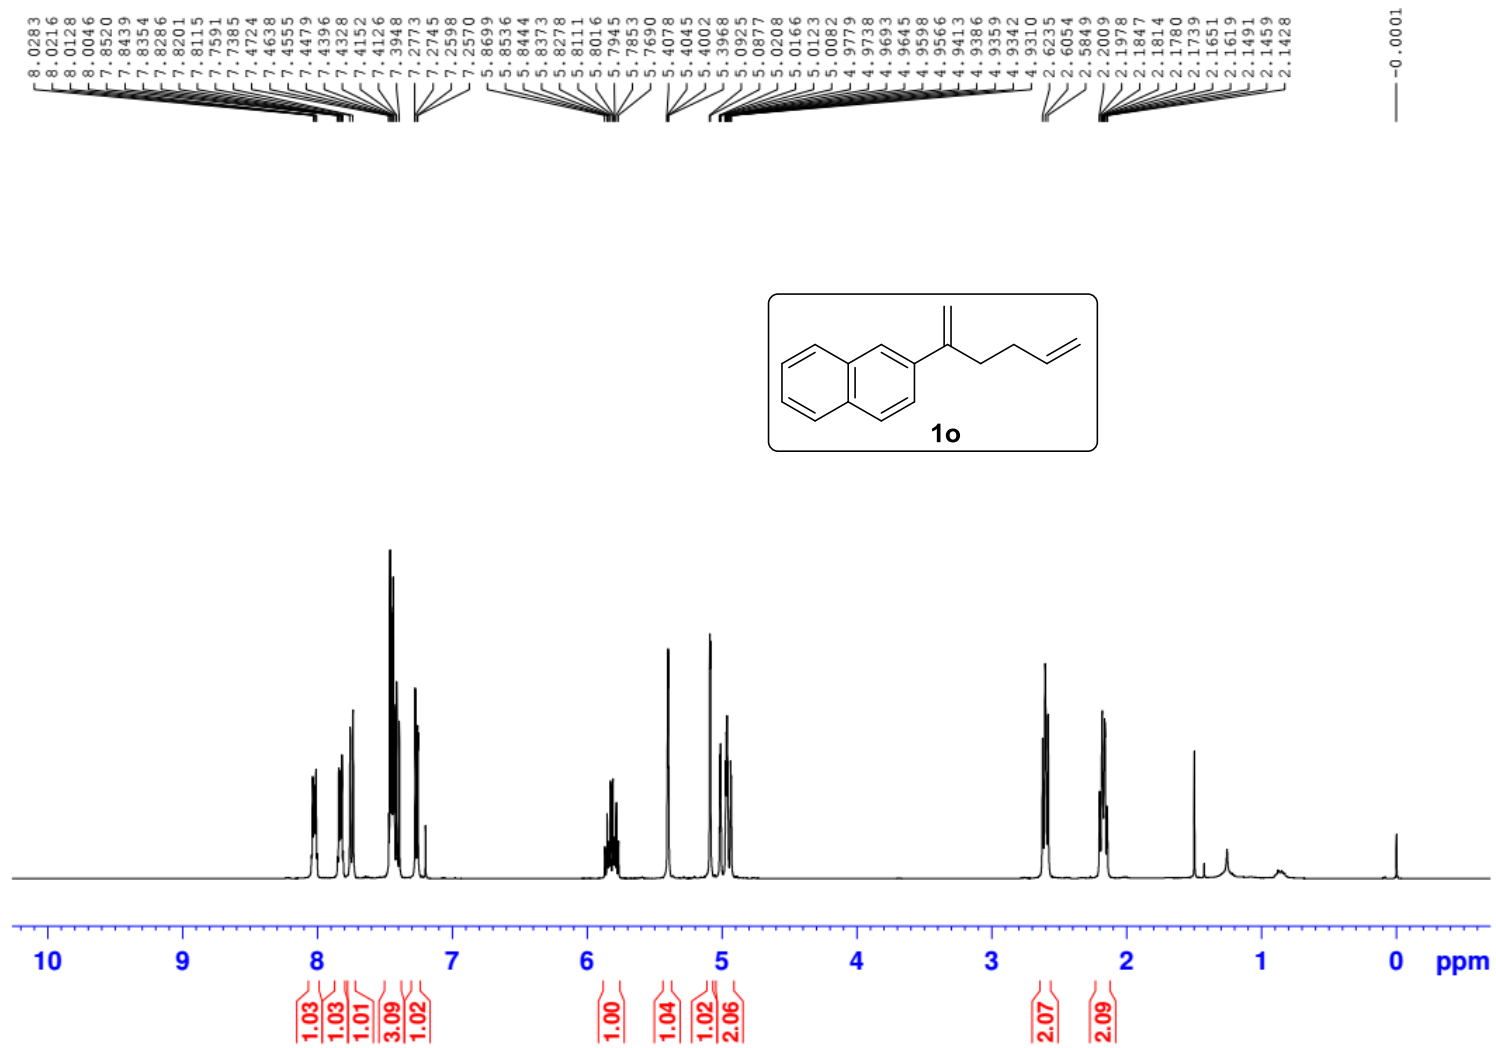

HY-X180226-1-CDC13-CNMR

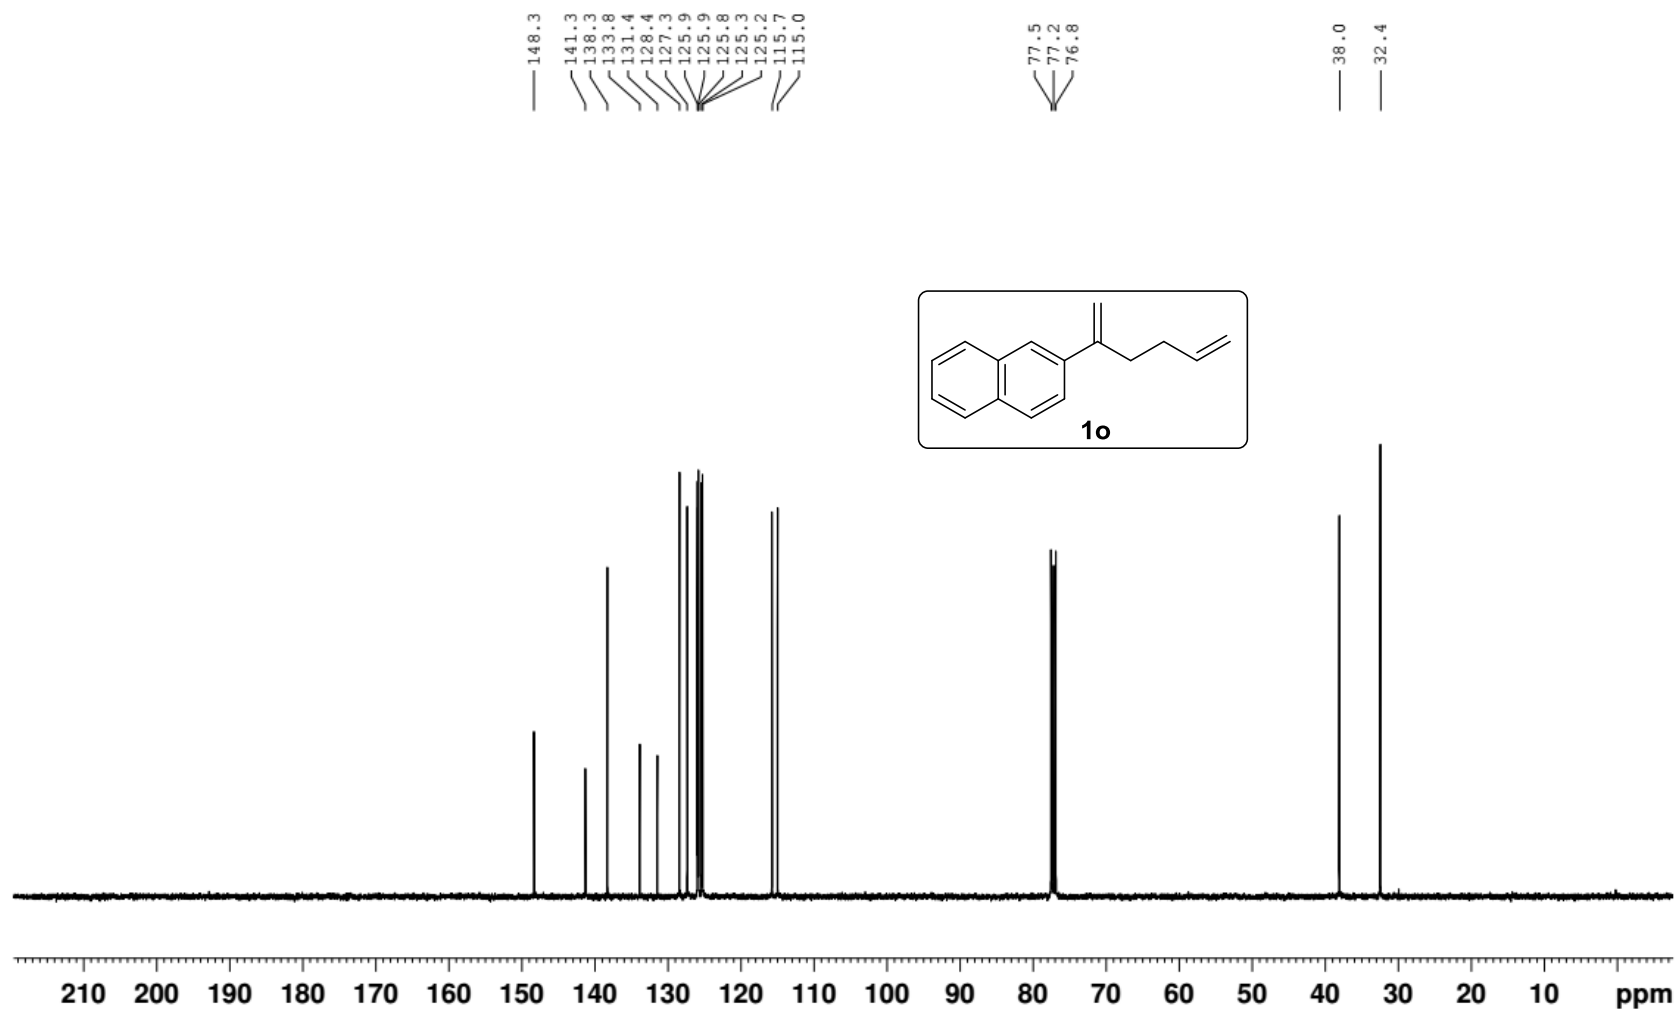

HY-X180424-1-CDC13-HNMR

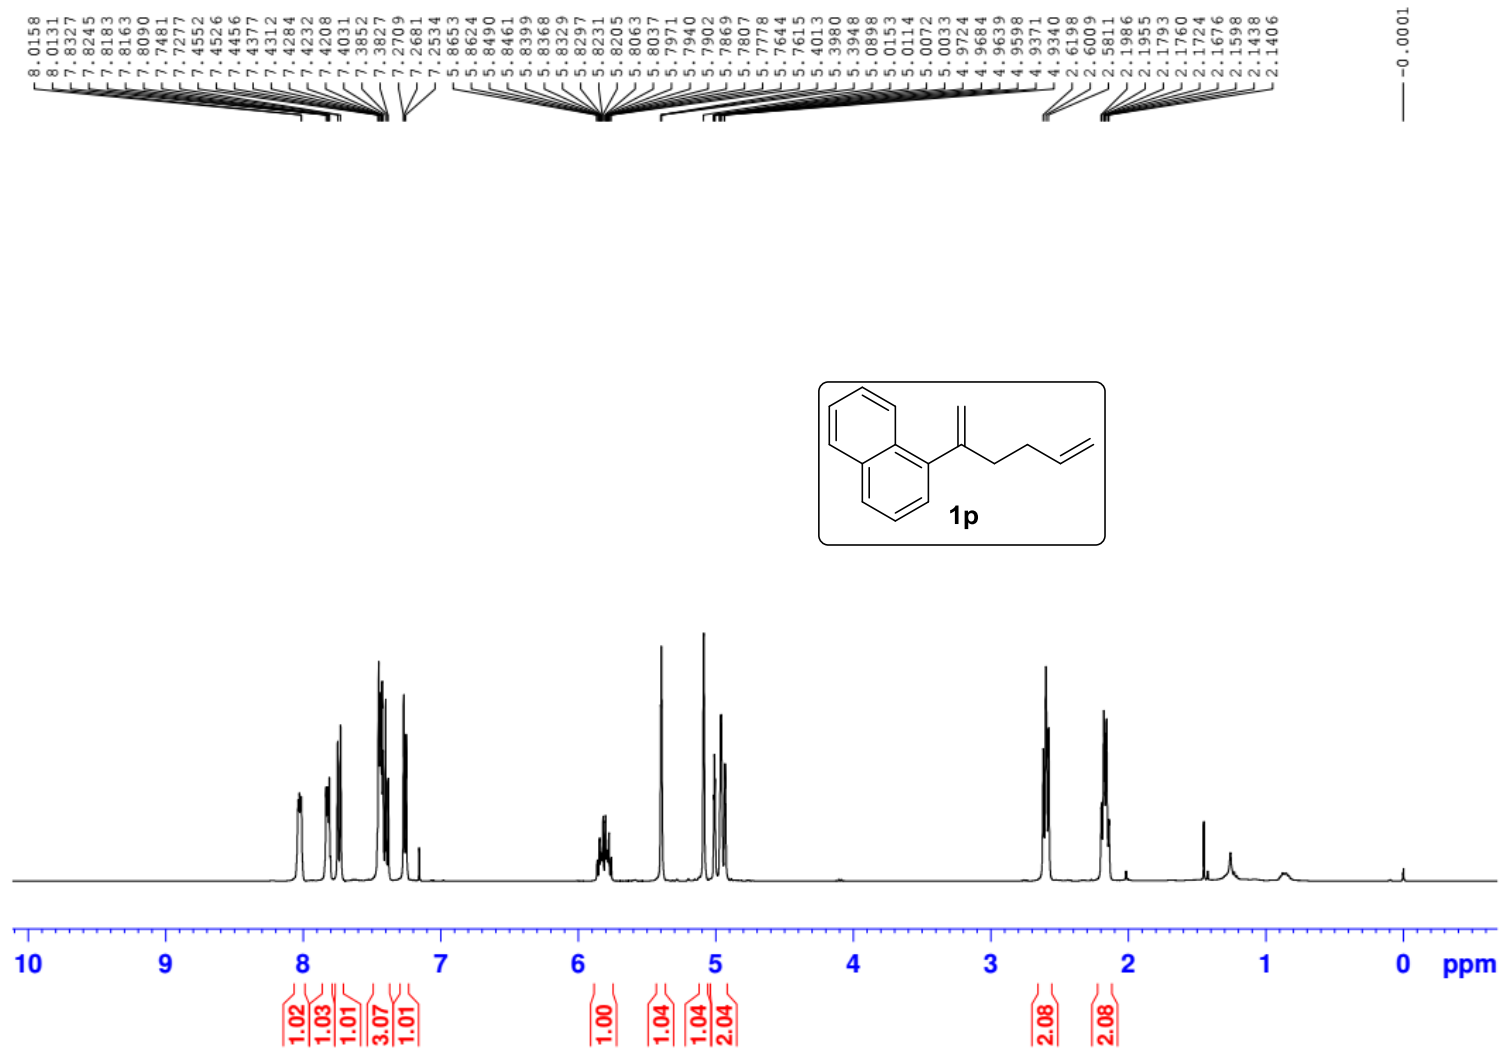

HY-X180424-2-CDCl<sub>3</sub>-CNMR

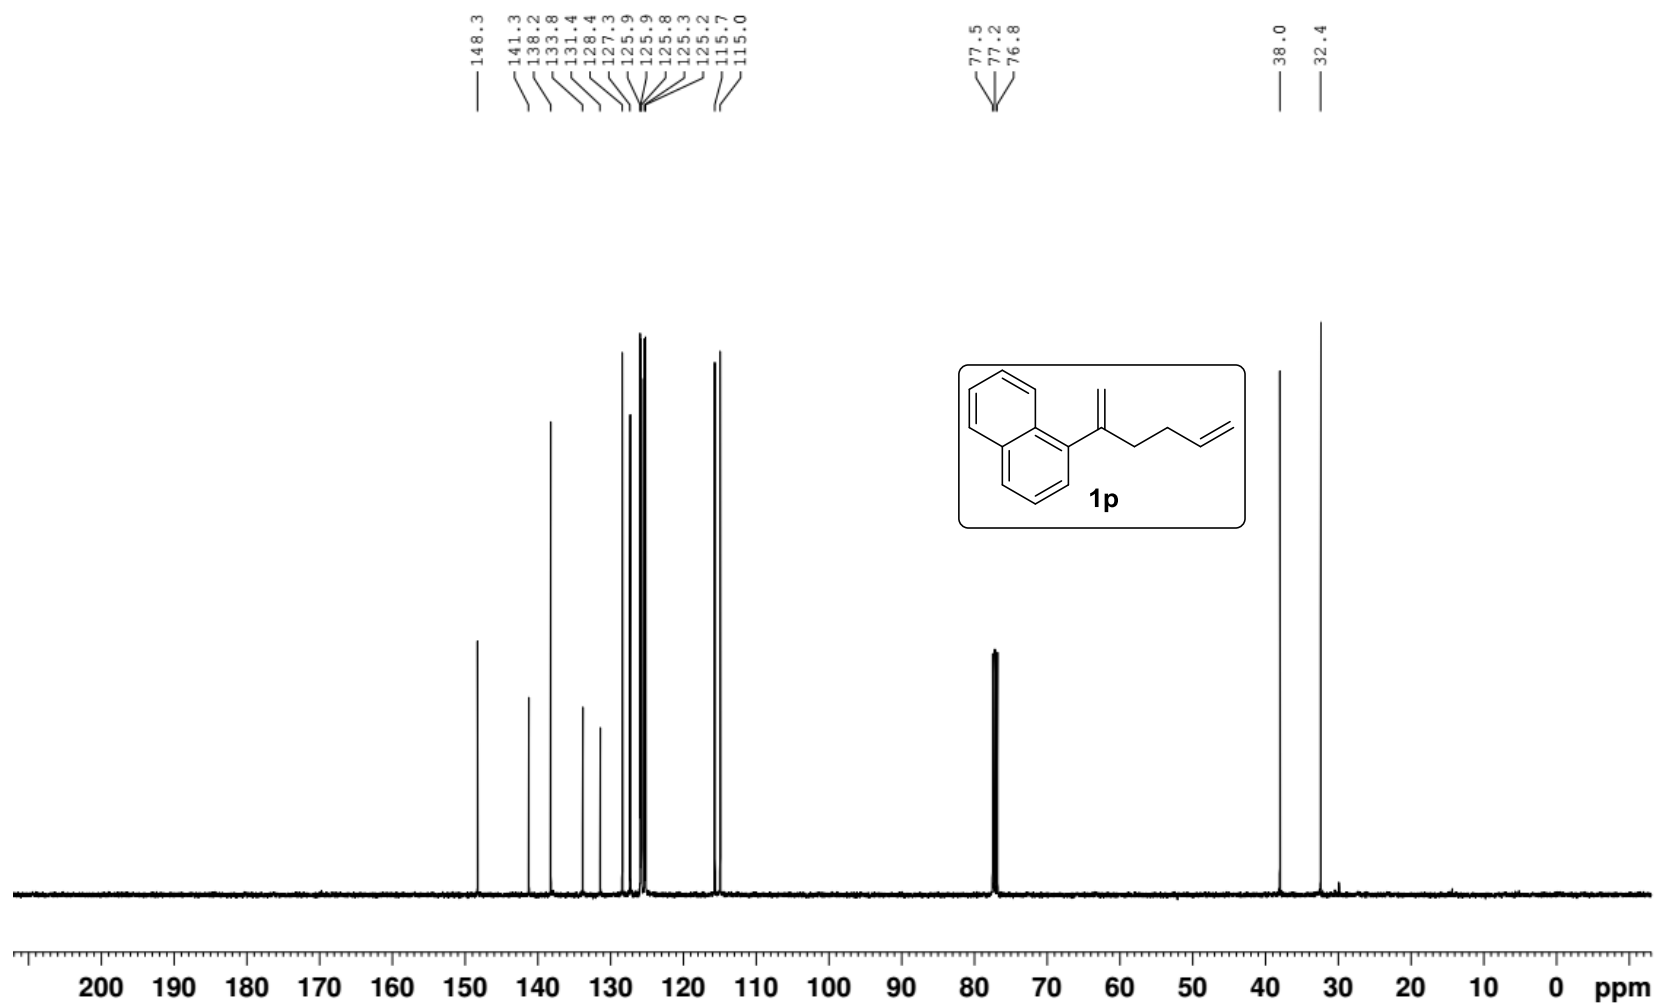



HY-X180430-1-CDC13-HNMR

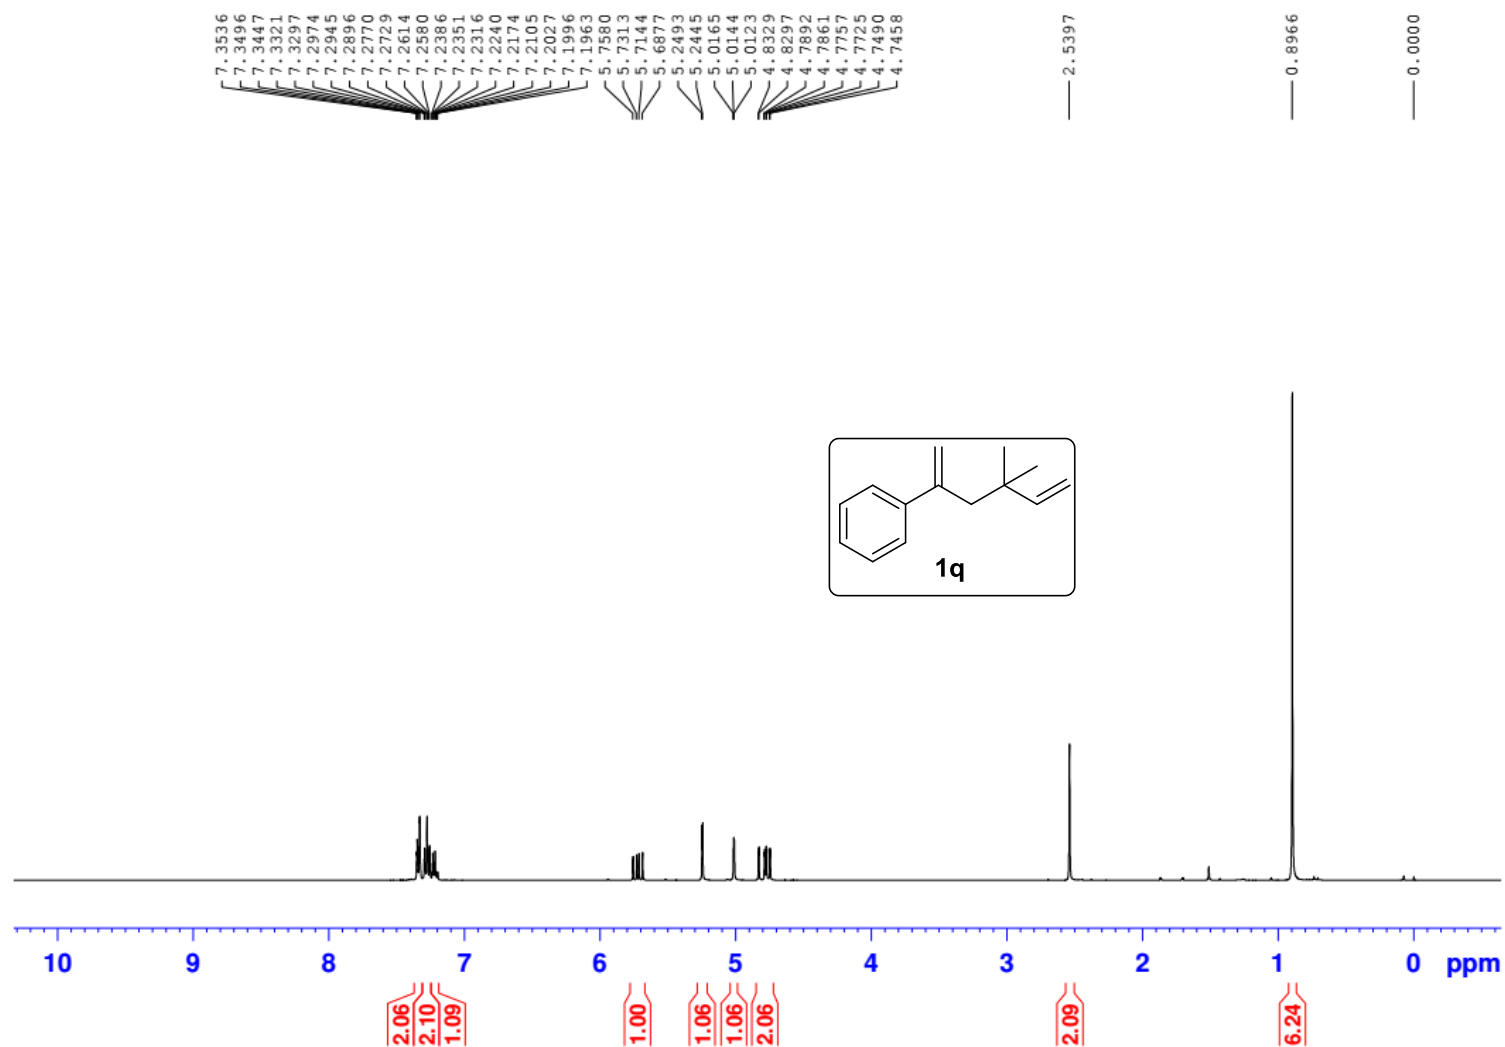

HY-X180430-1-CDC13-CNMR

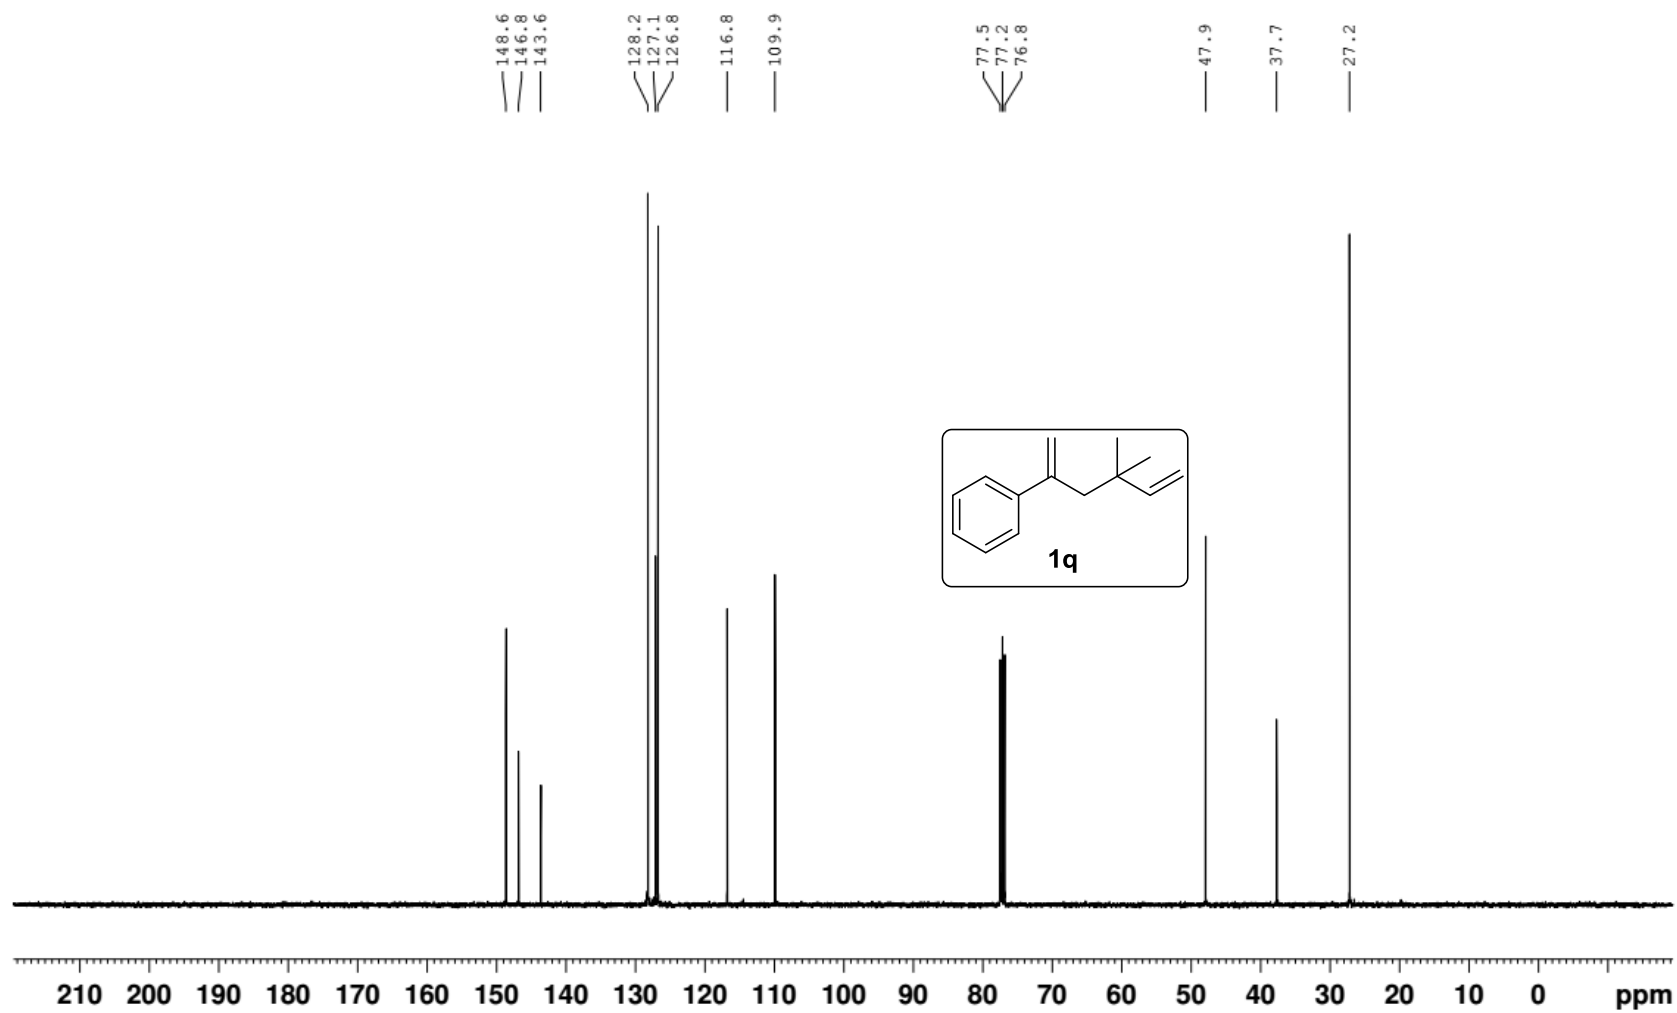

HY-X180401-2-CDC13-HNMR

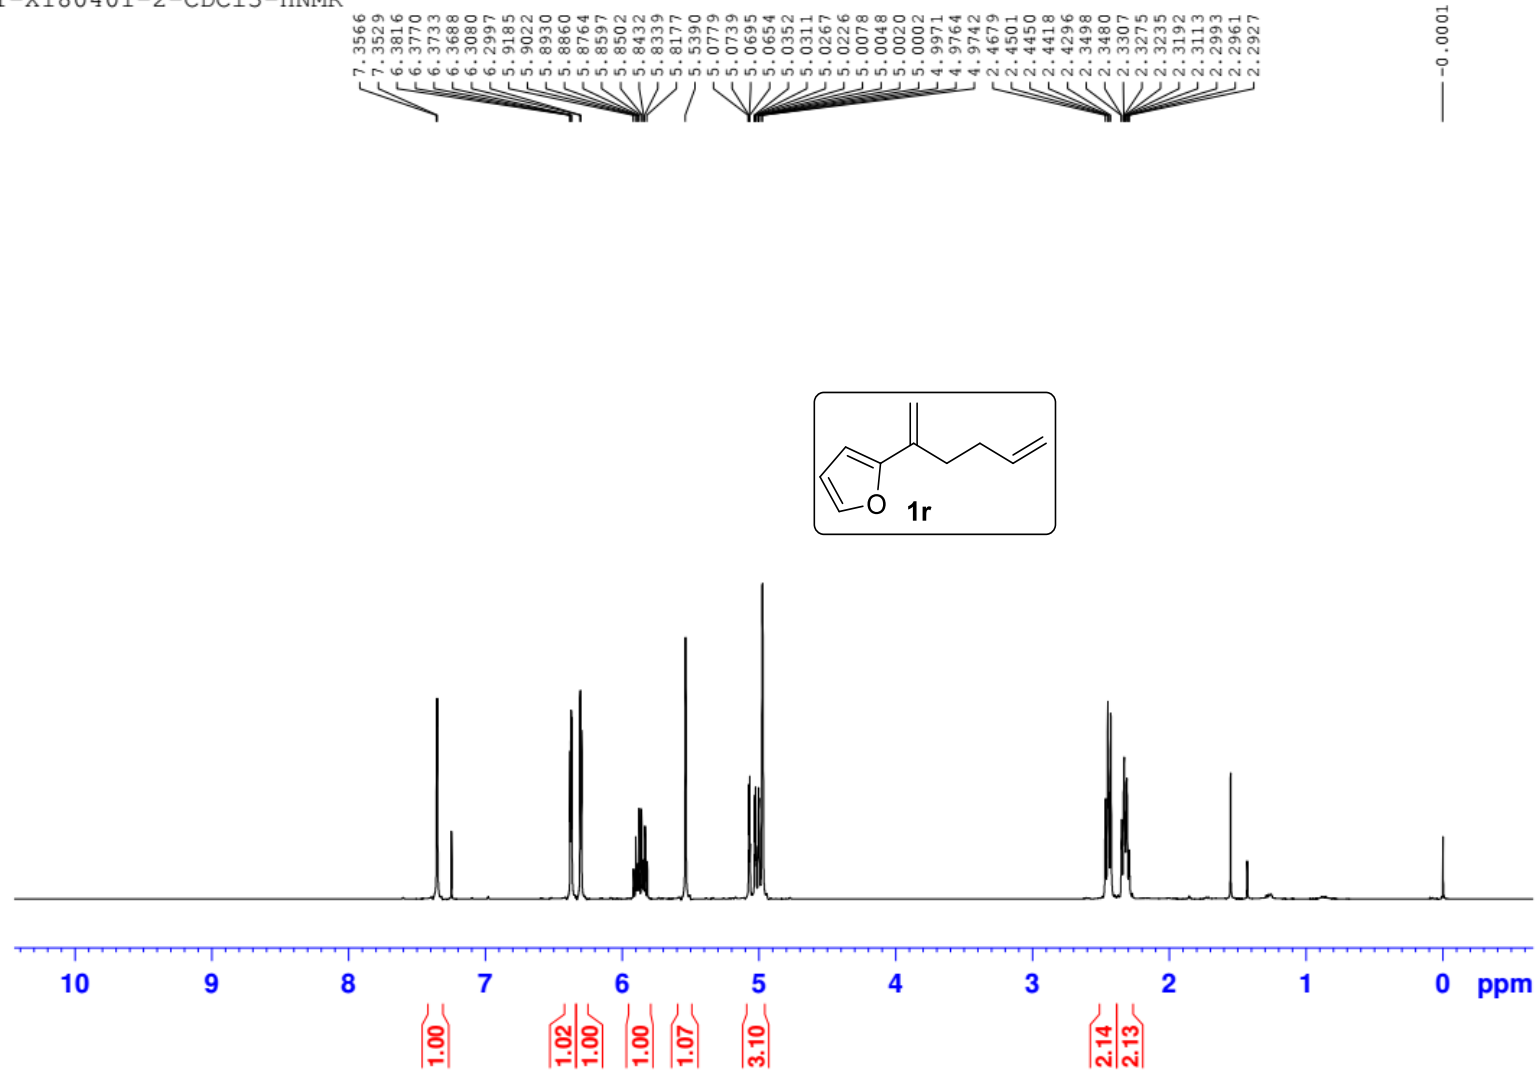

HY-X180401-2-CDC13-CNMR

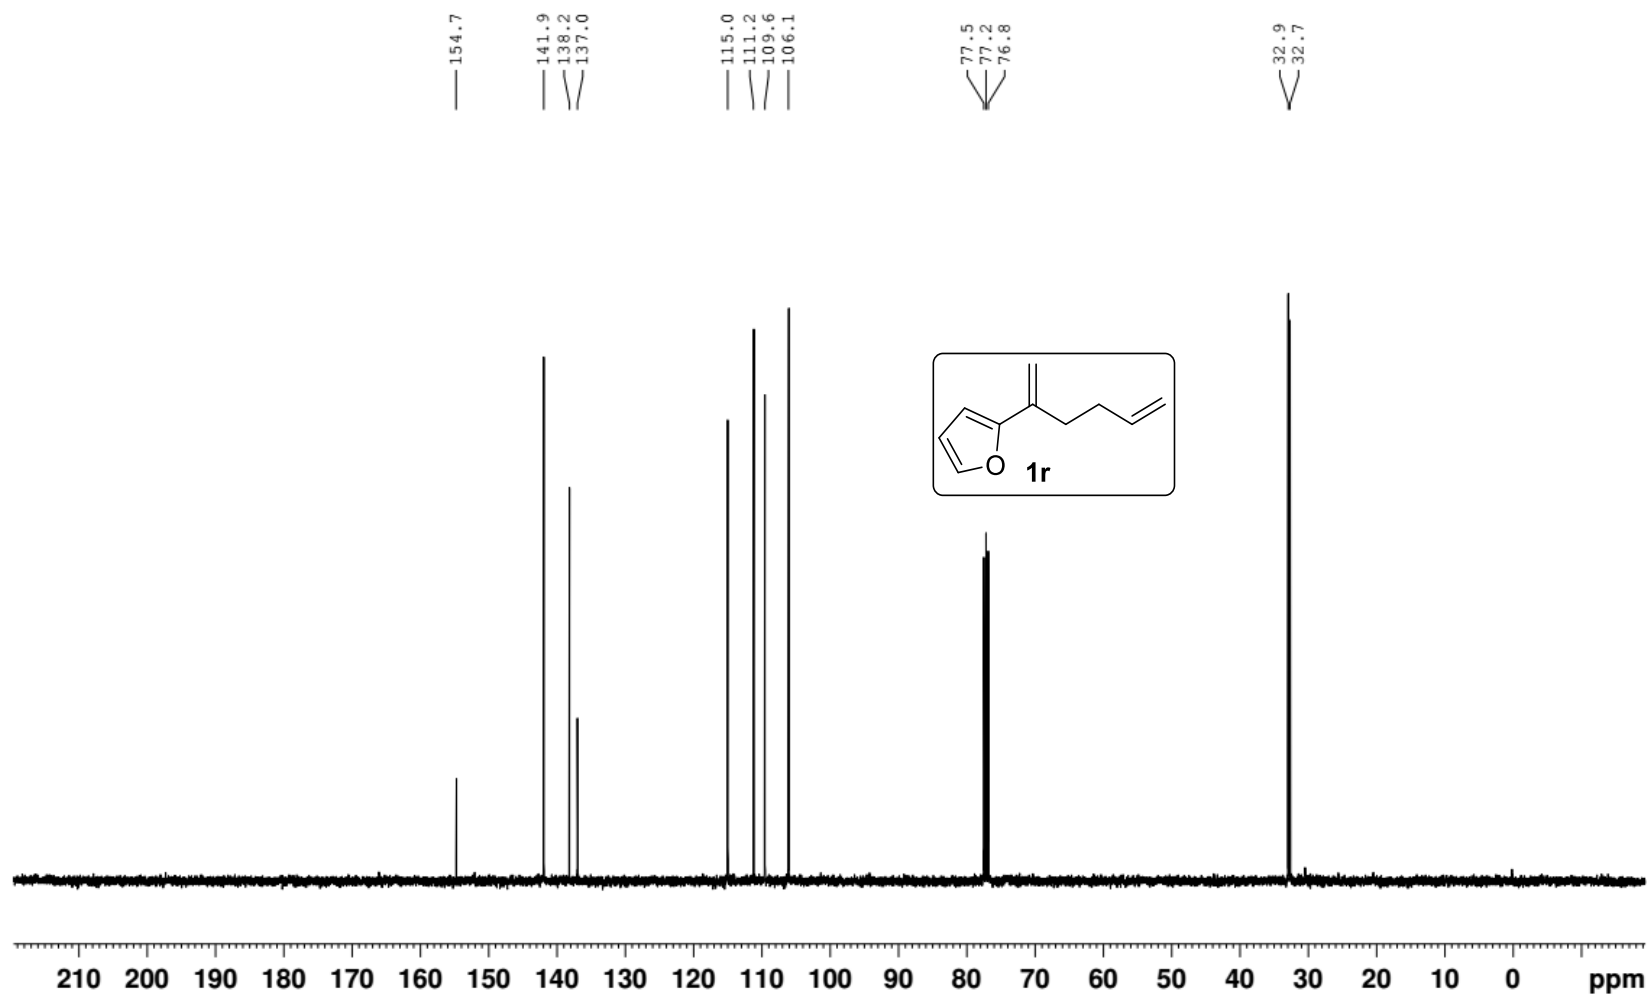

HY-X180401-3-CDC13-HNMR

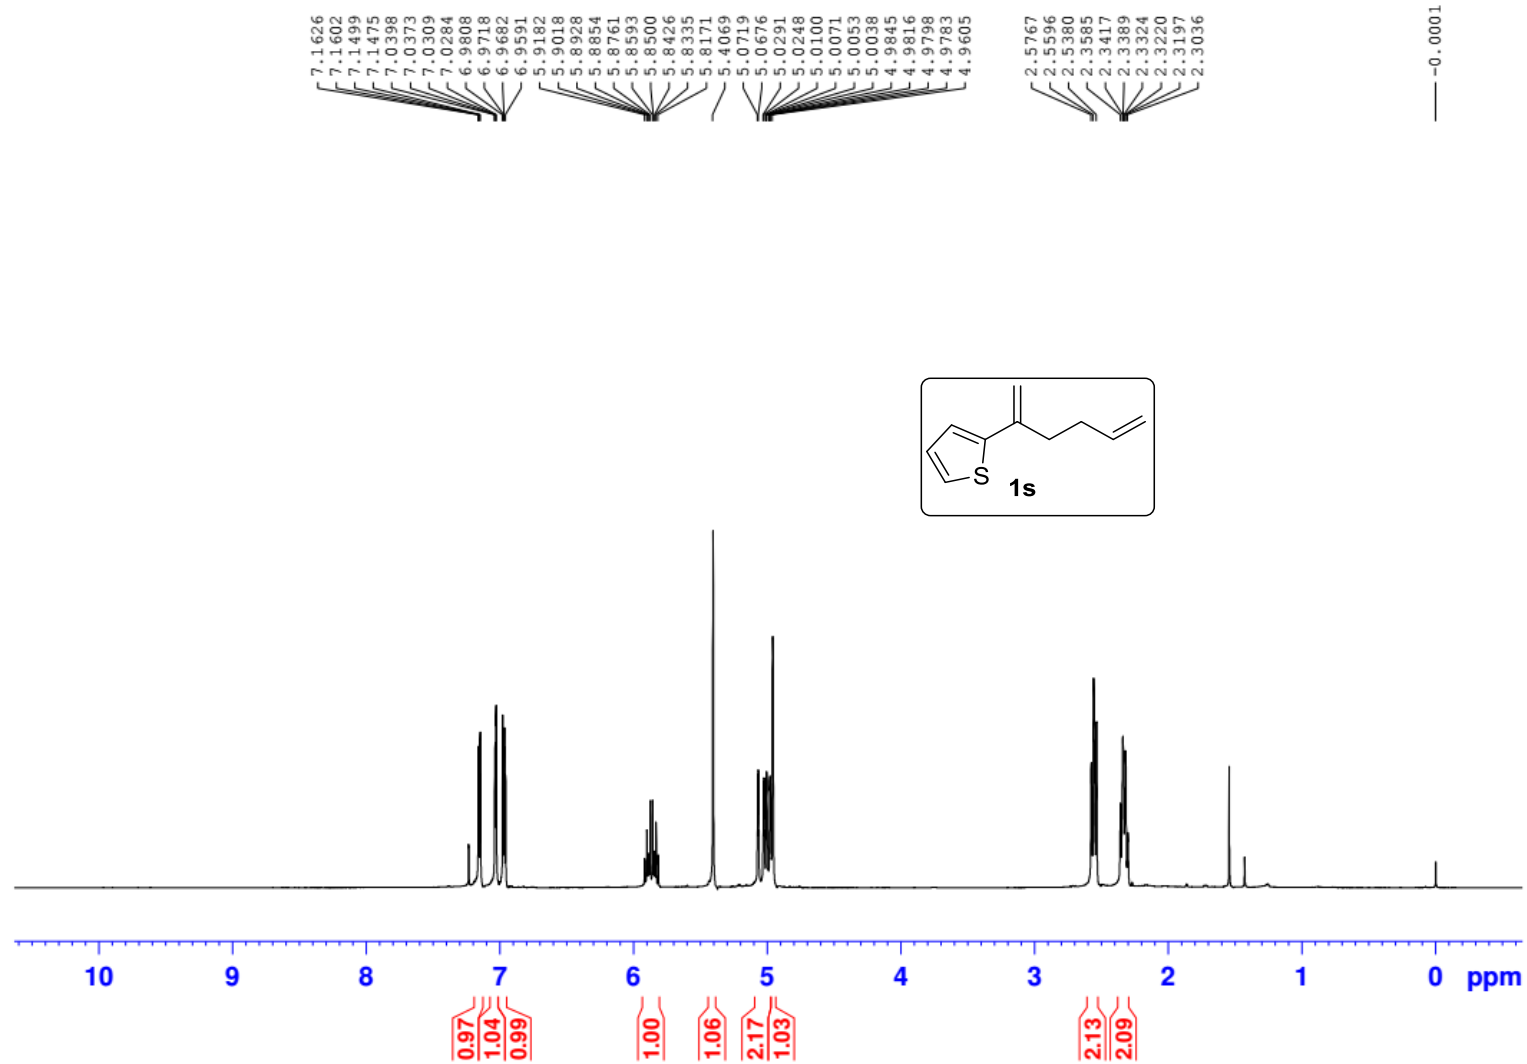

HY-X180401-3-CDC13-CNMR

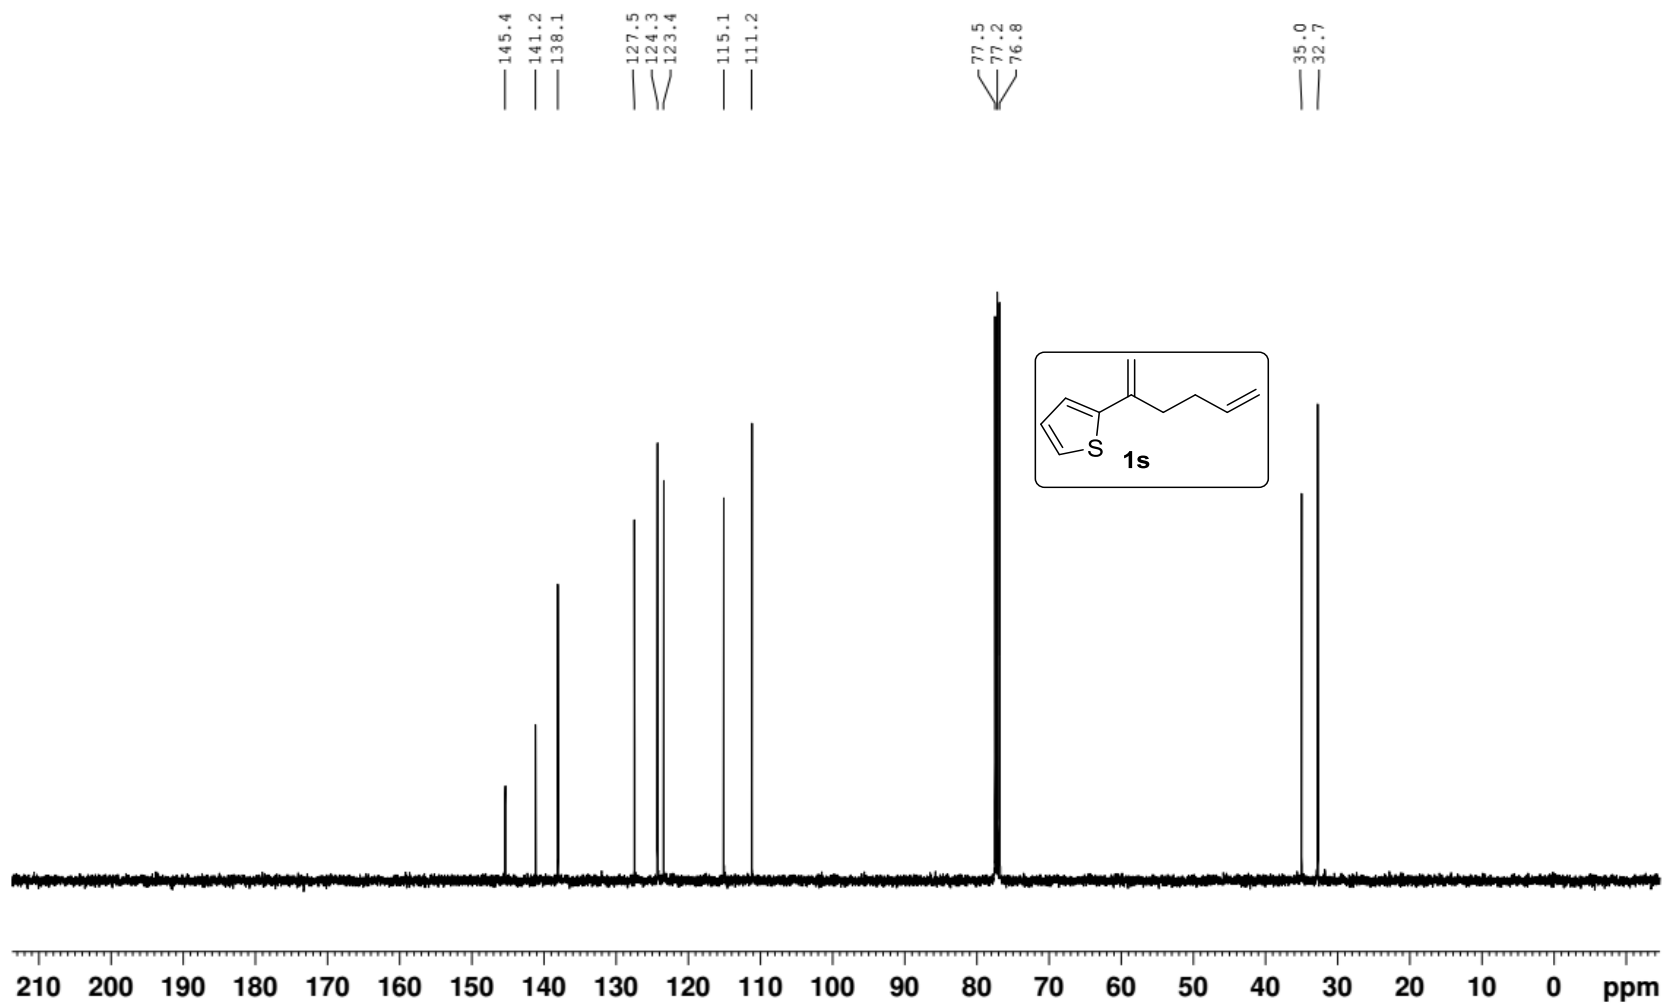

HY-X180318-1-CDC13-HNMR

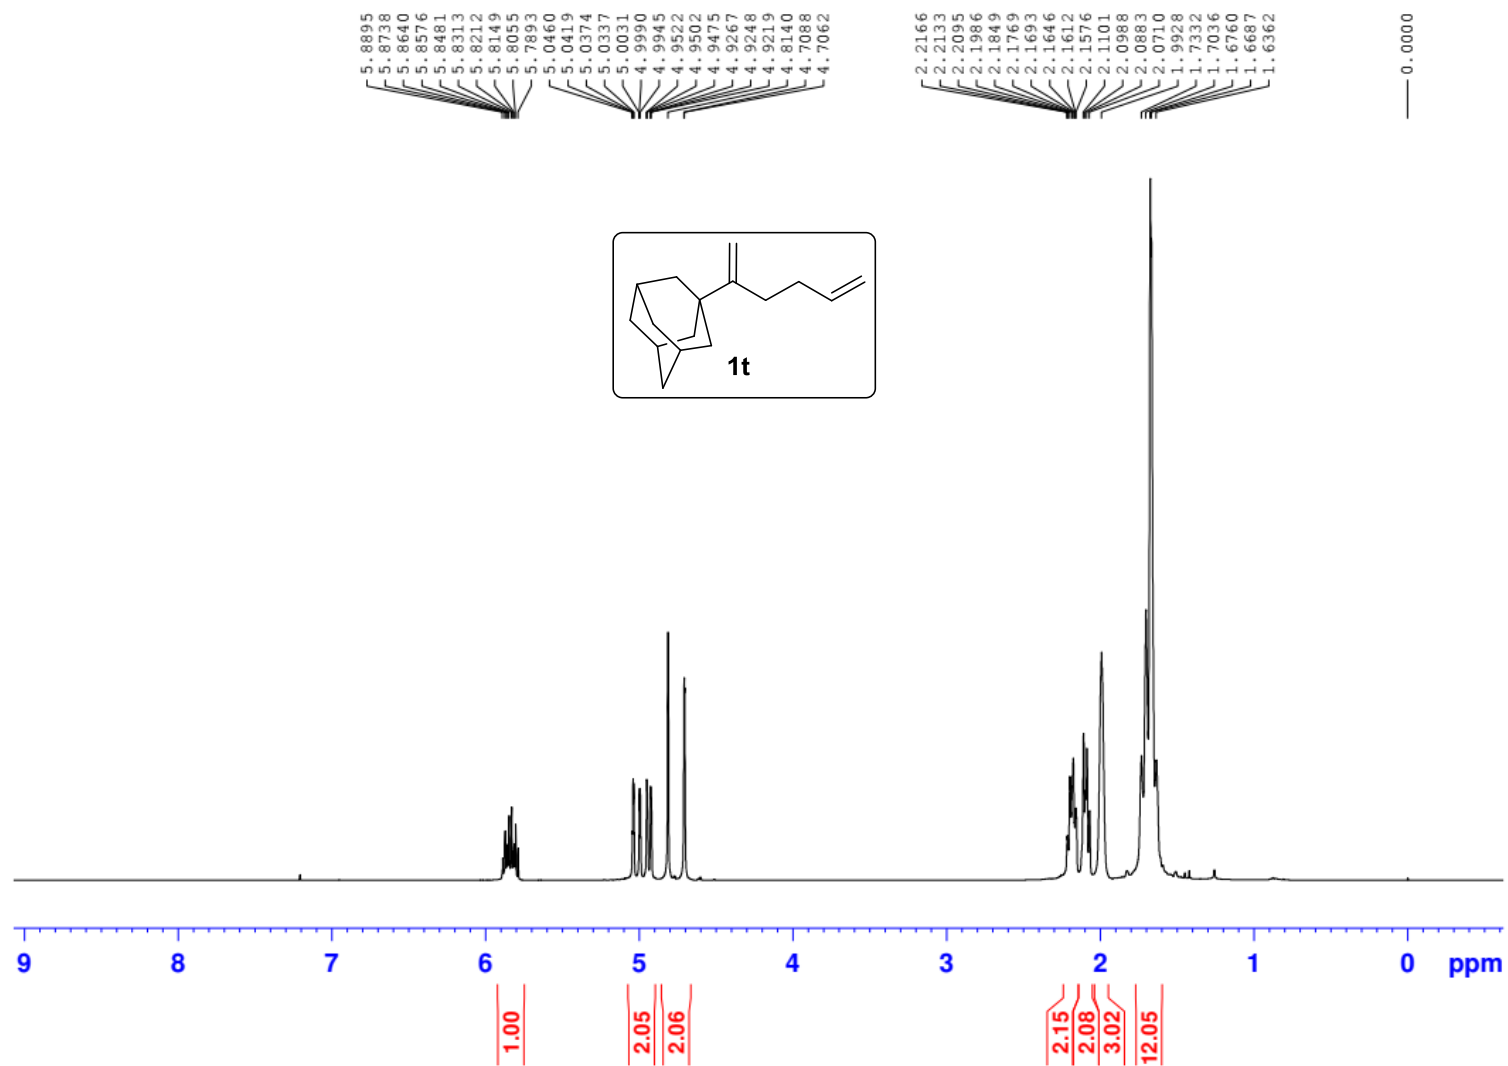

HY-X180318-1-CDCl<sub>3</sub>-CNMR

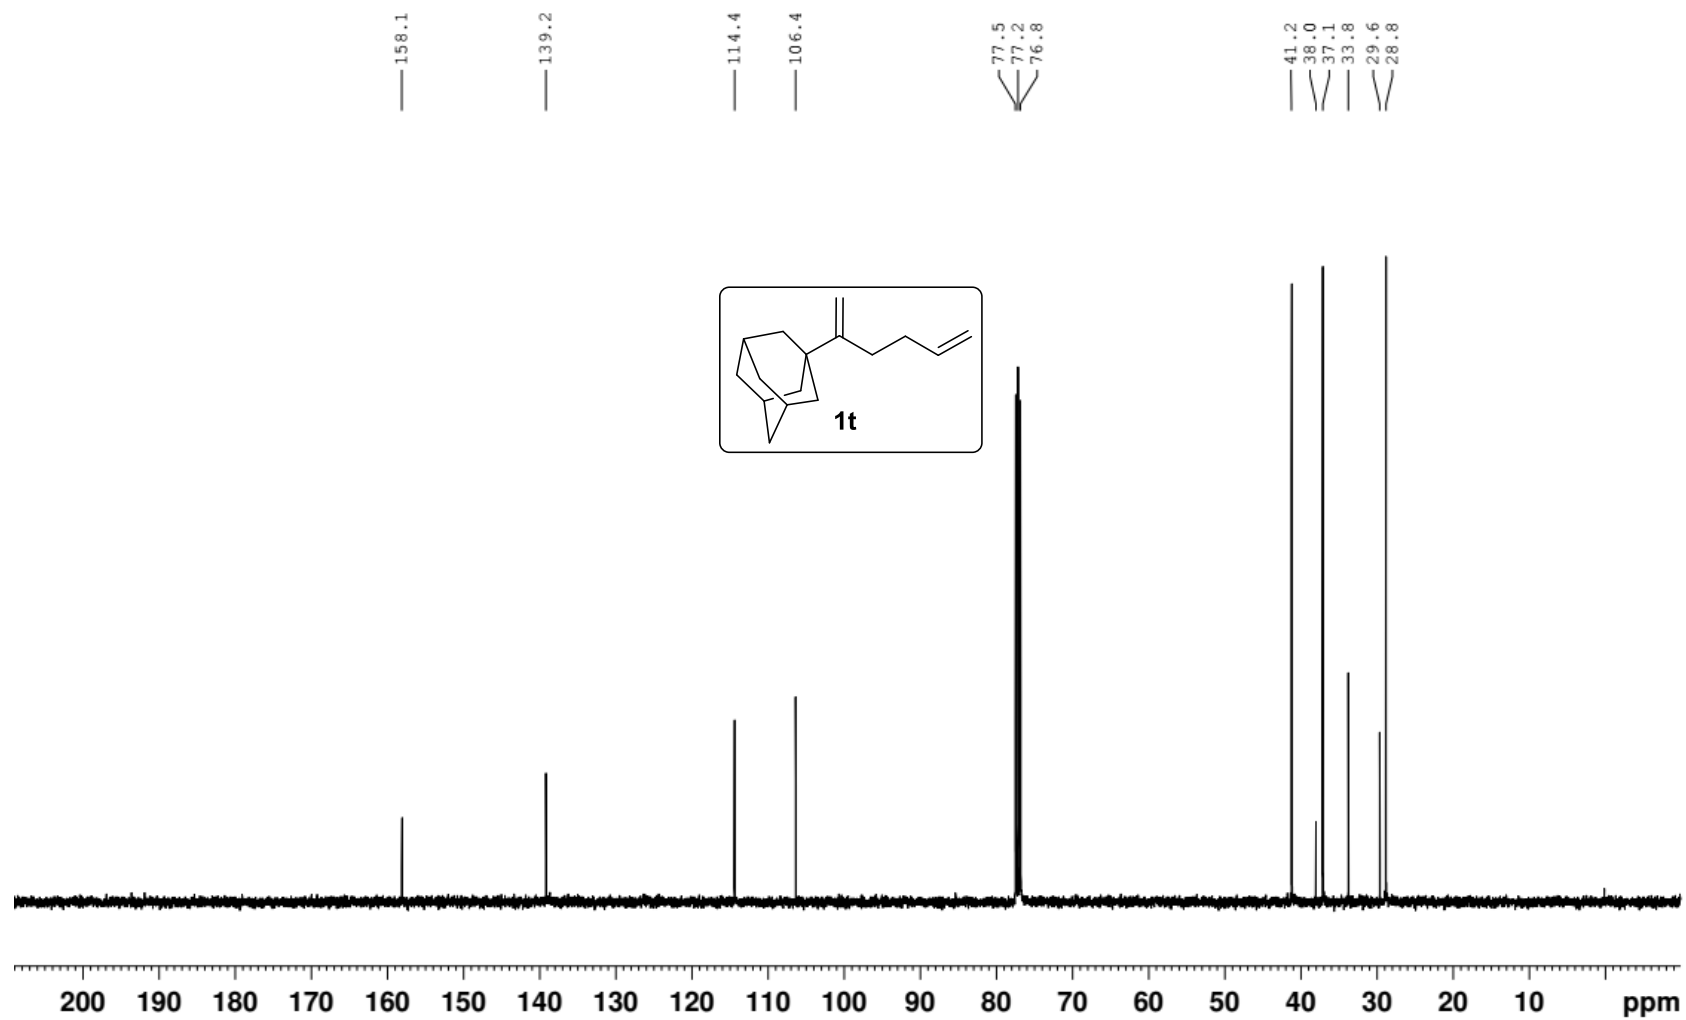





GB-X180129-1-0-HNMR

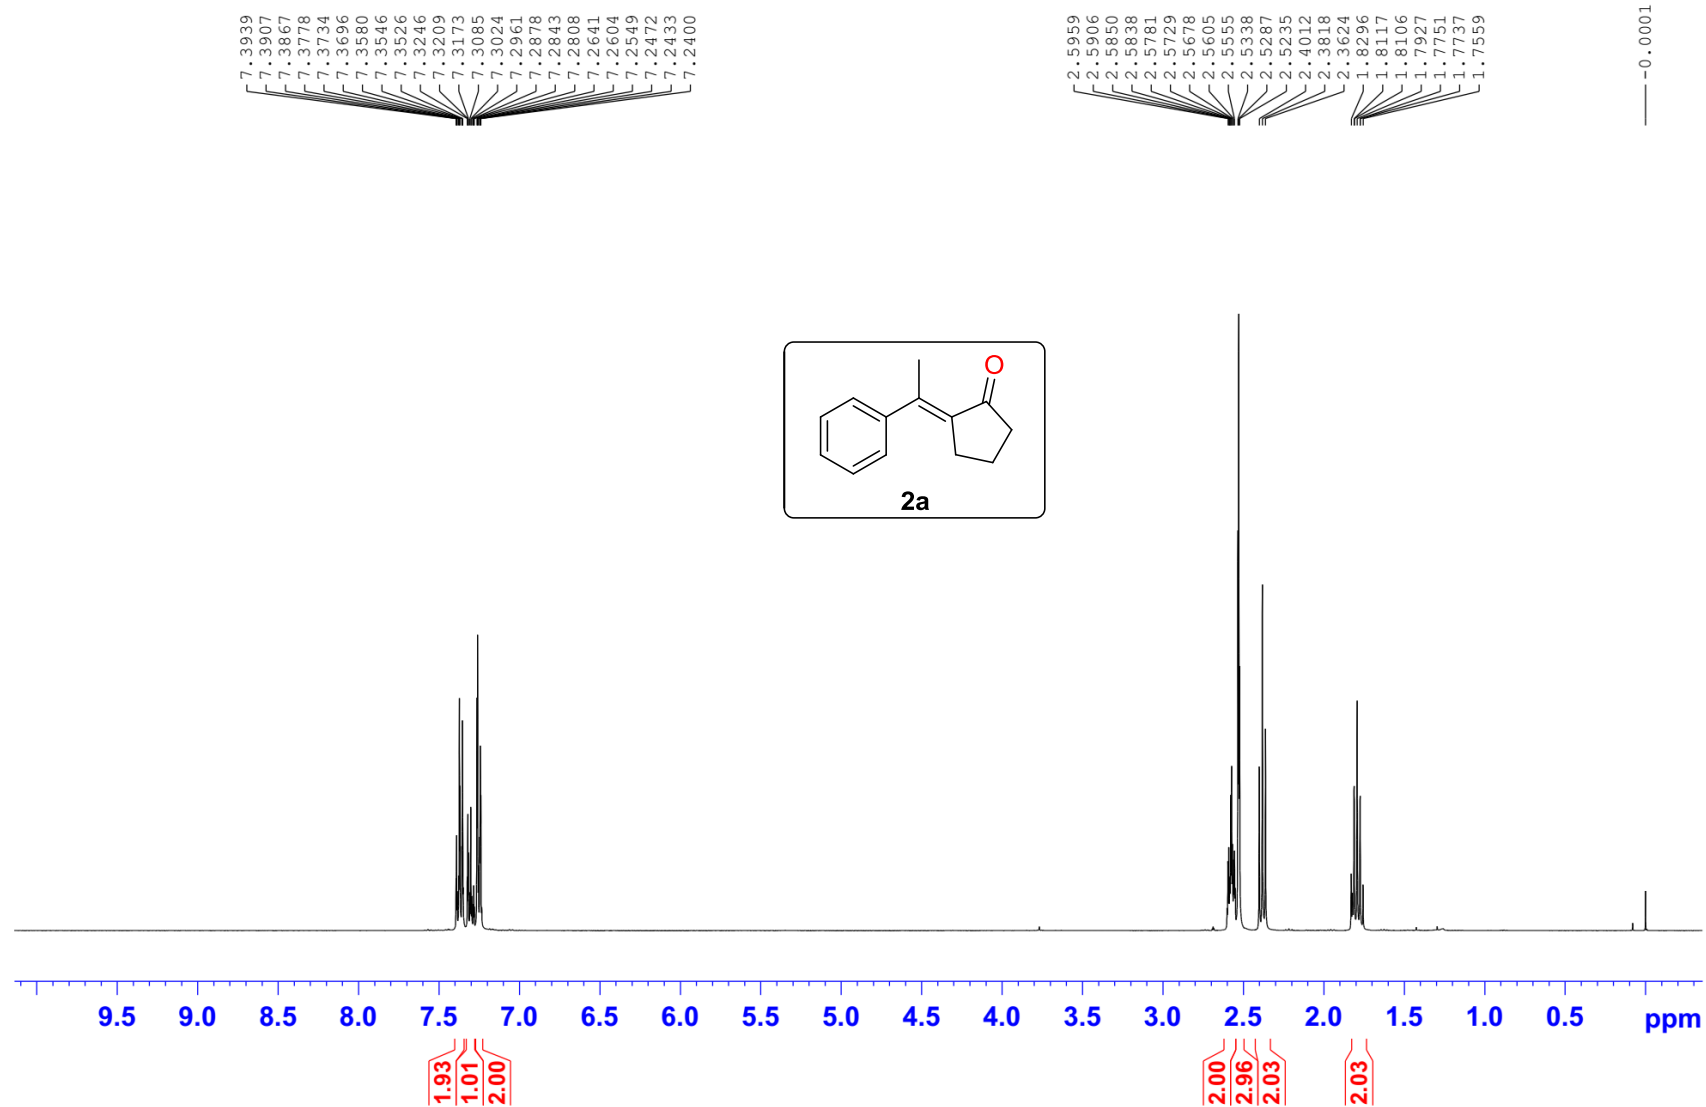

GB-X180129-1-0-CNMR

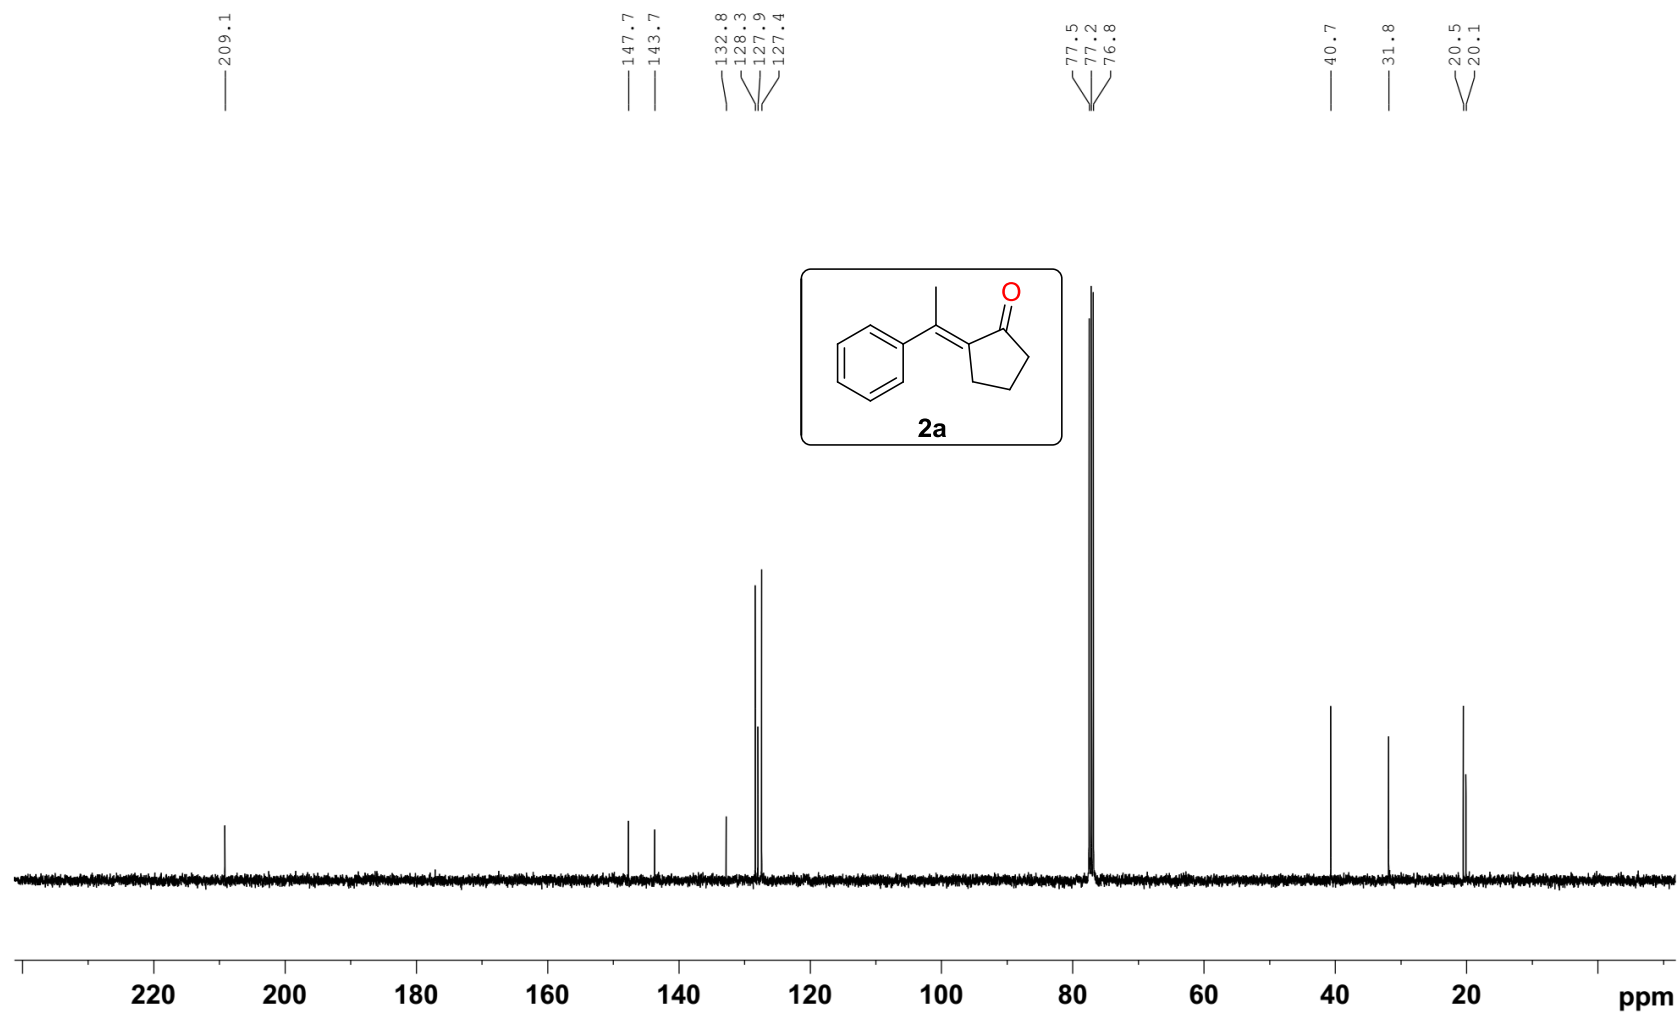

ZSC-X18X25-2a-cis-CDCl<sub>3</sub>-HNMR

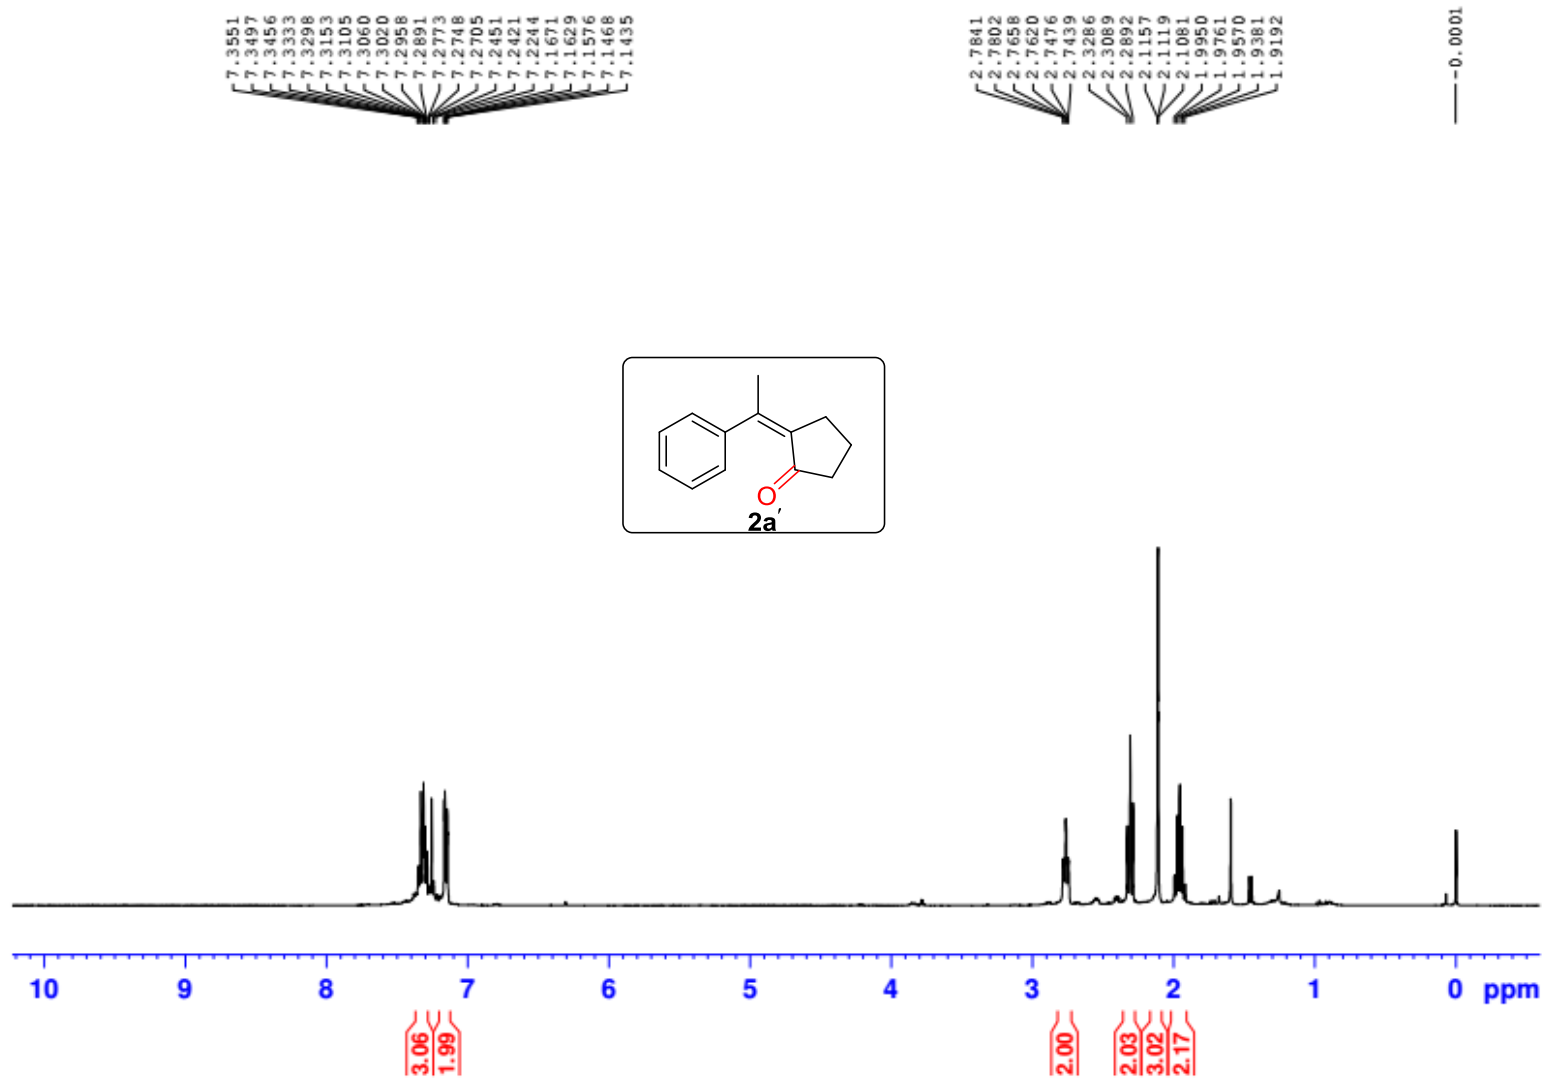

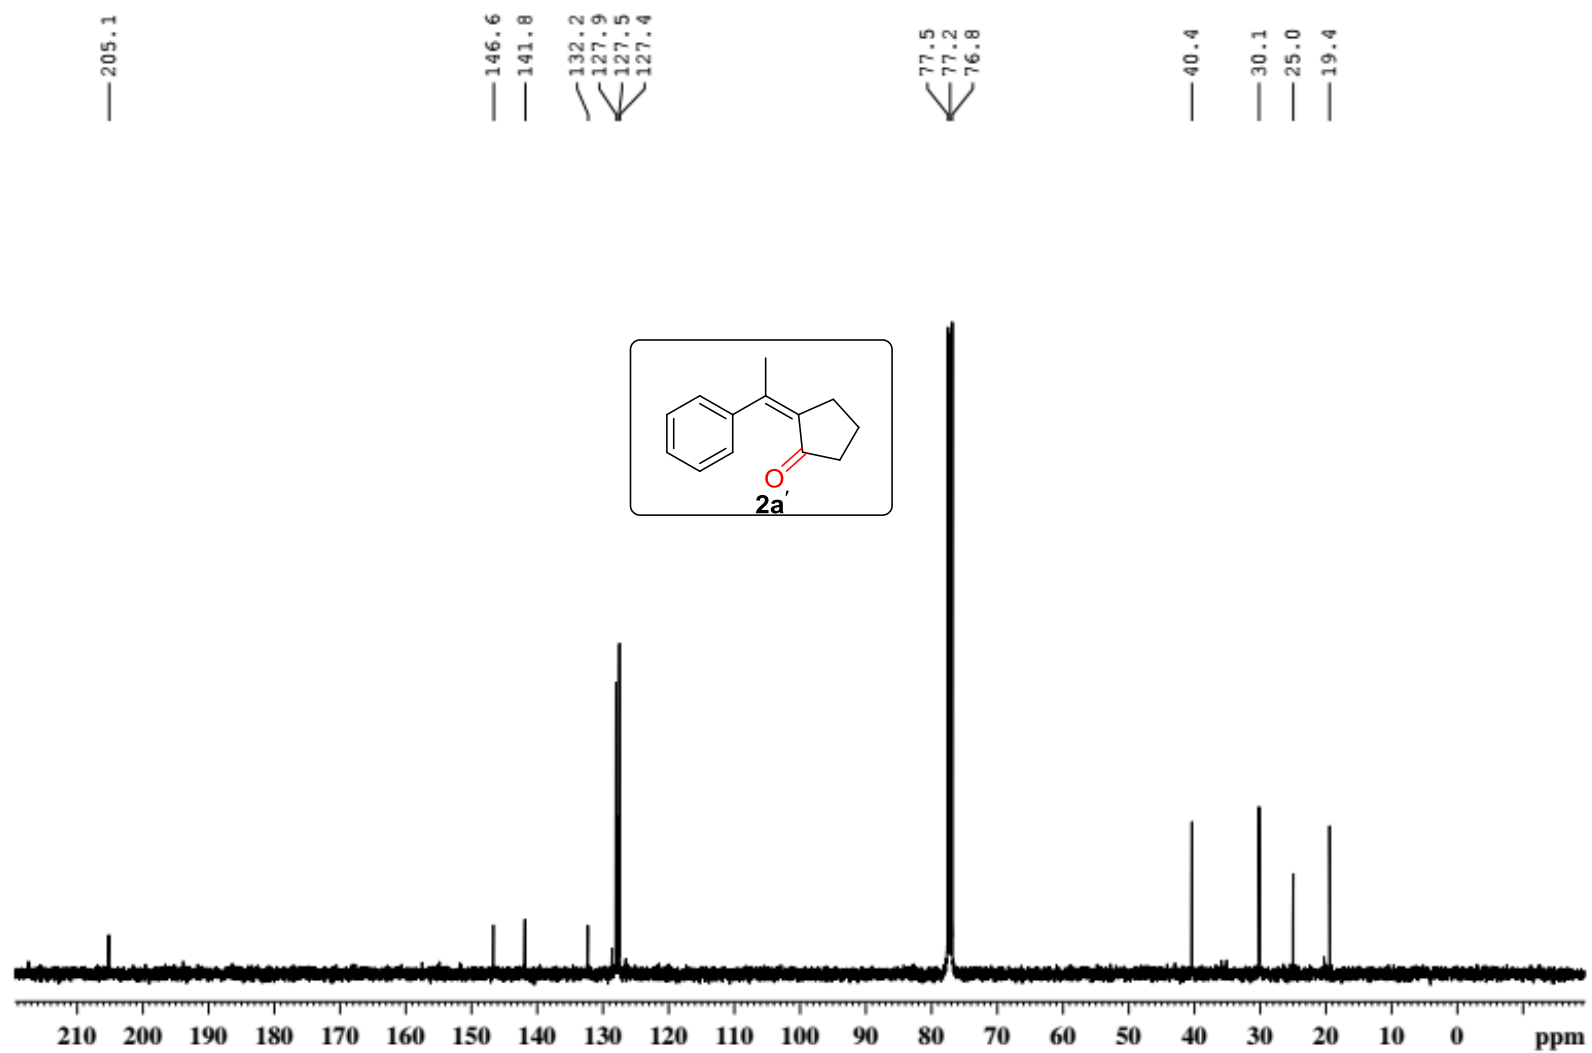

GB-X180129-1-1-HNMR

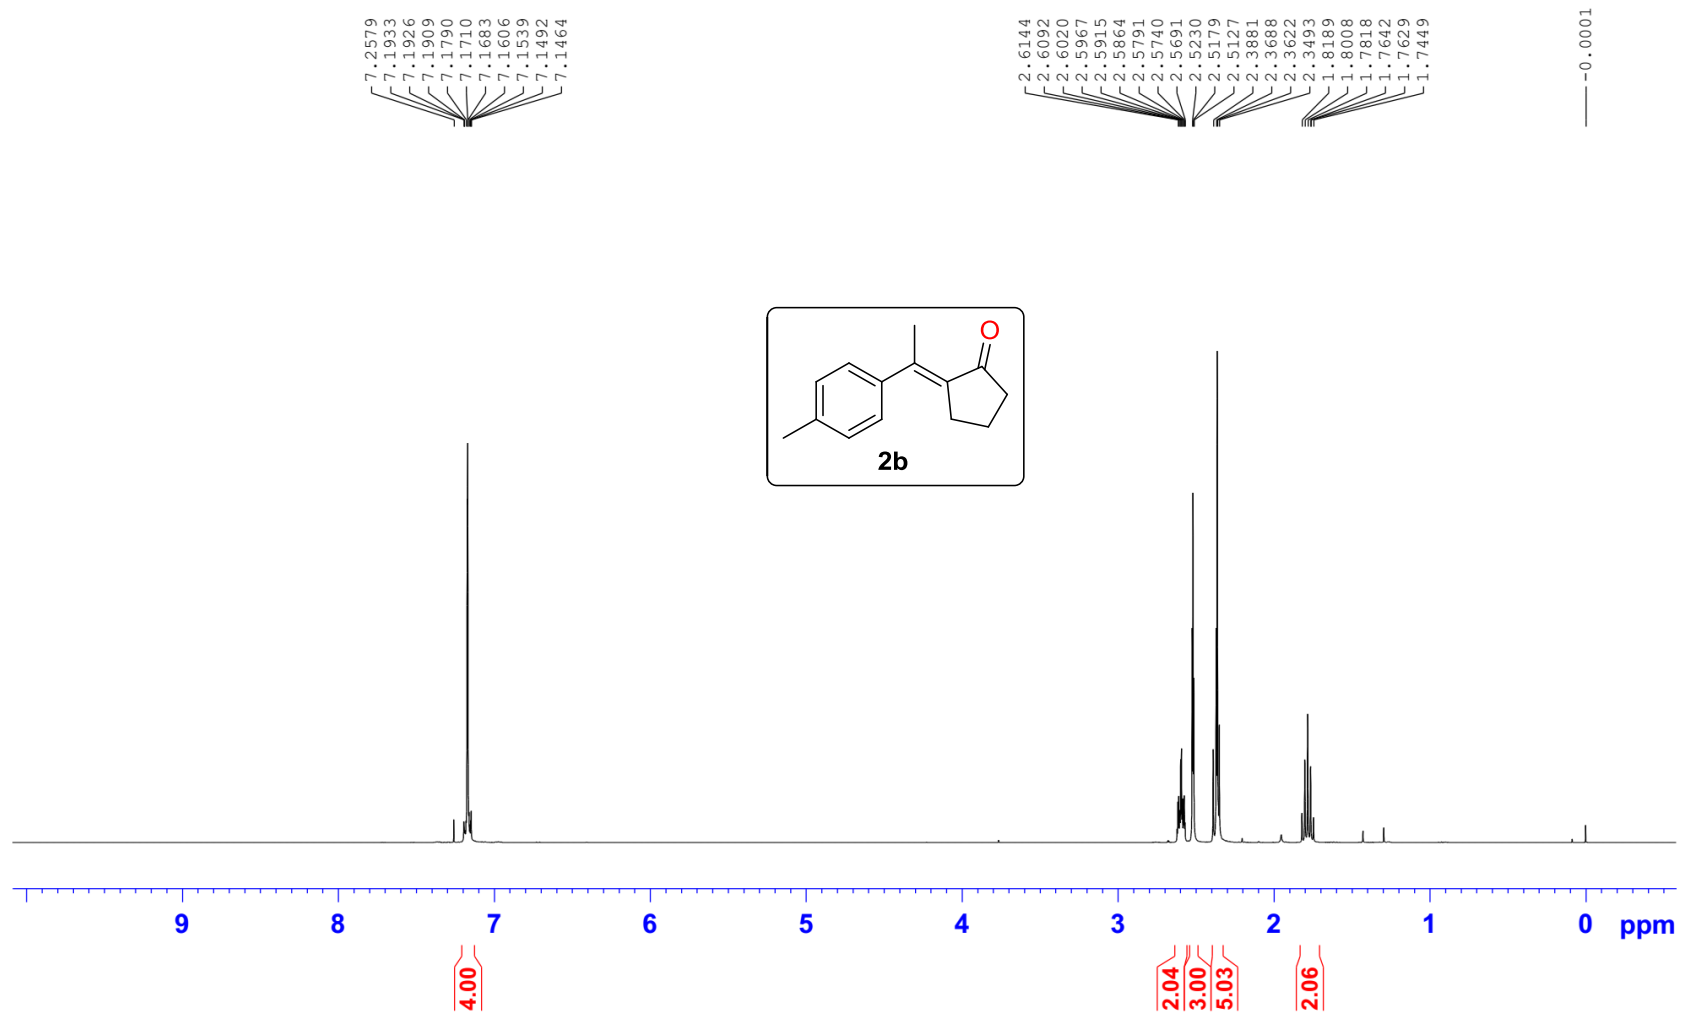

GB-X180129-1-1-CNMR

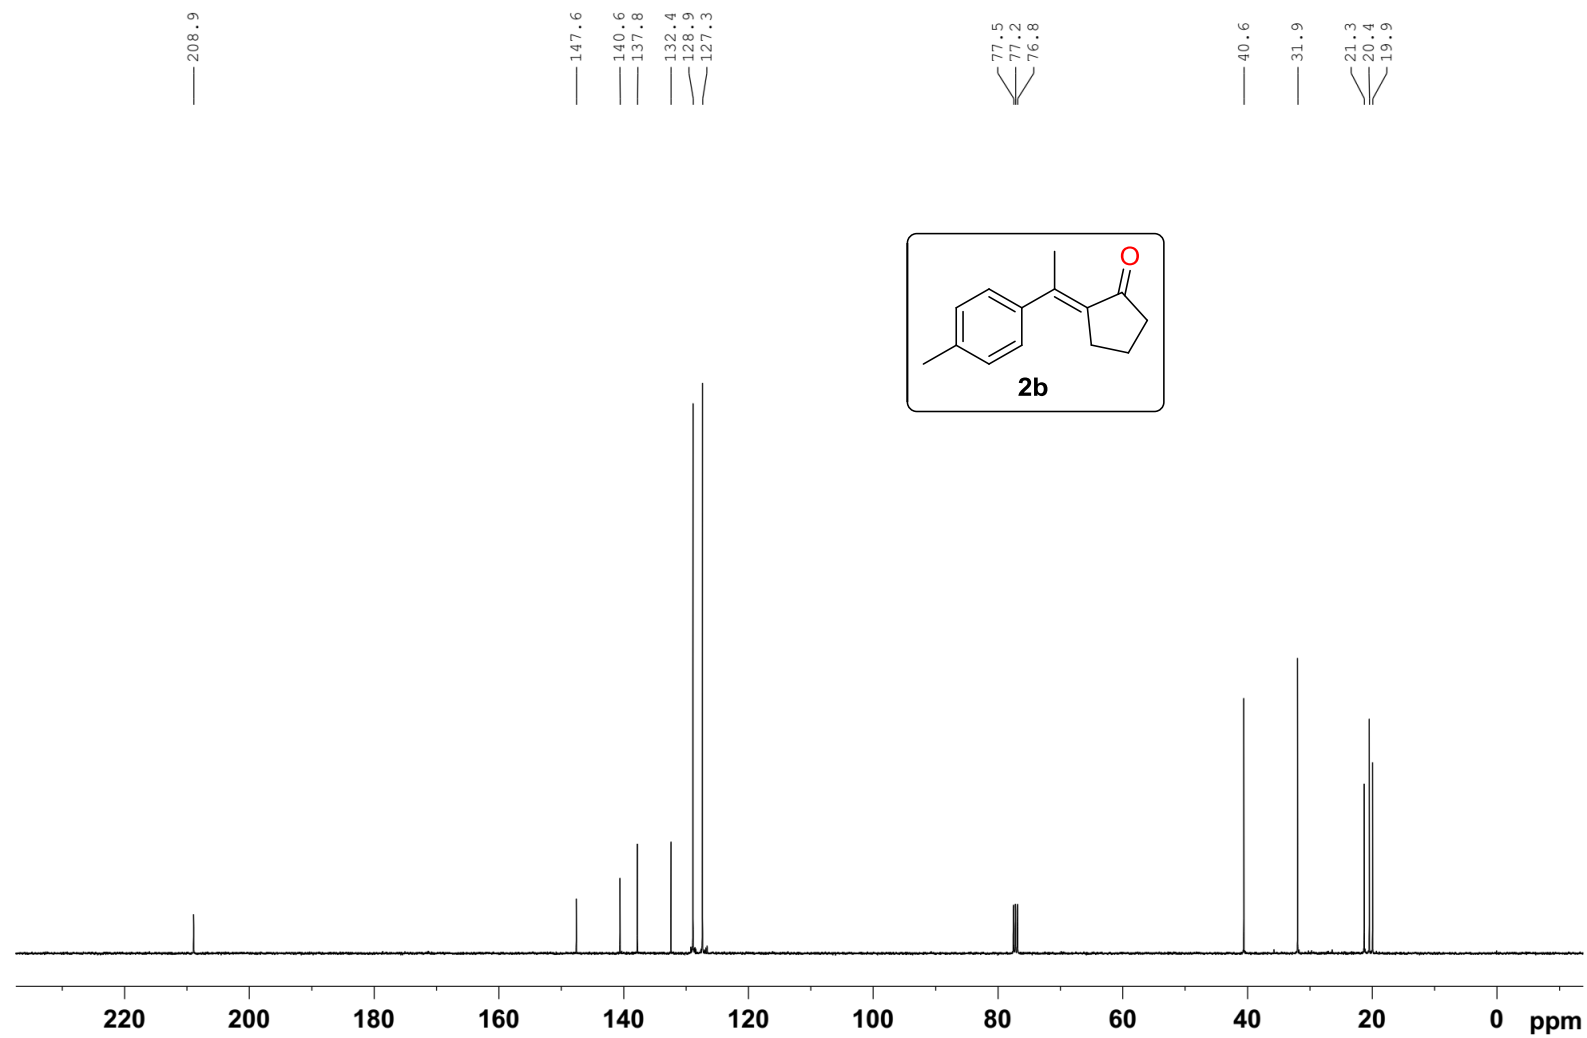

GB-X180129-1-2-3Me-HNMR

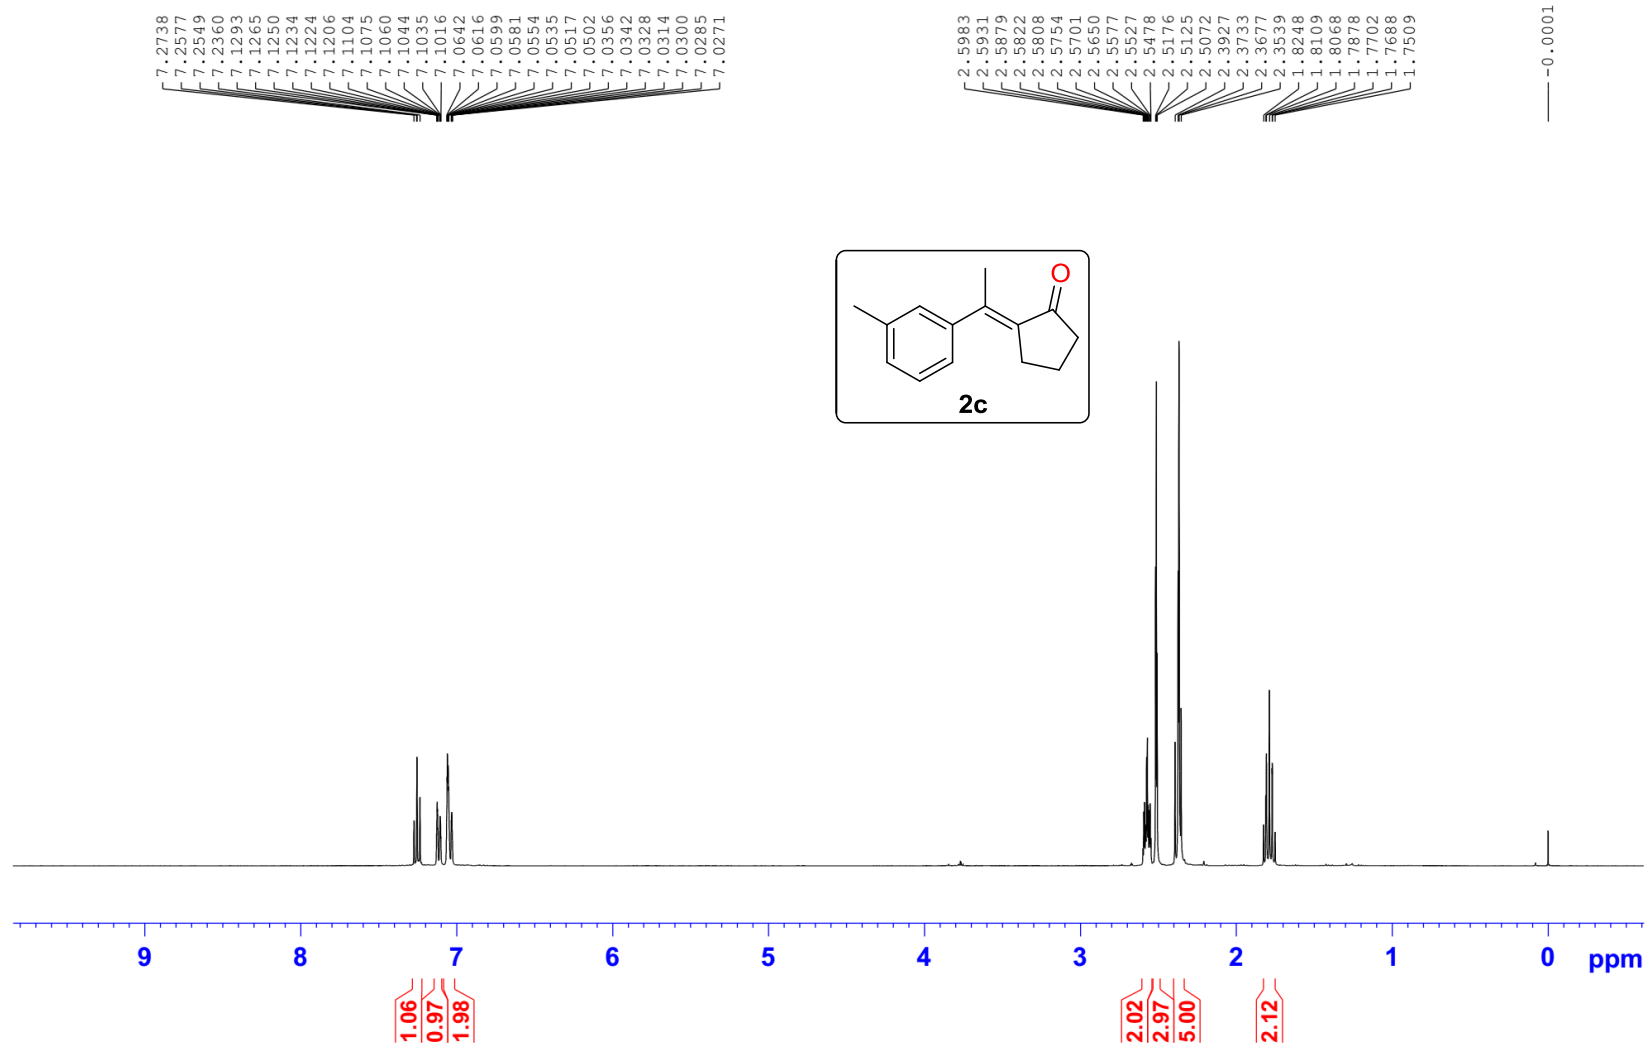



GB-X180129-1-2-3Me-CNMR

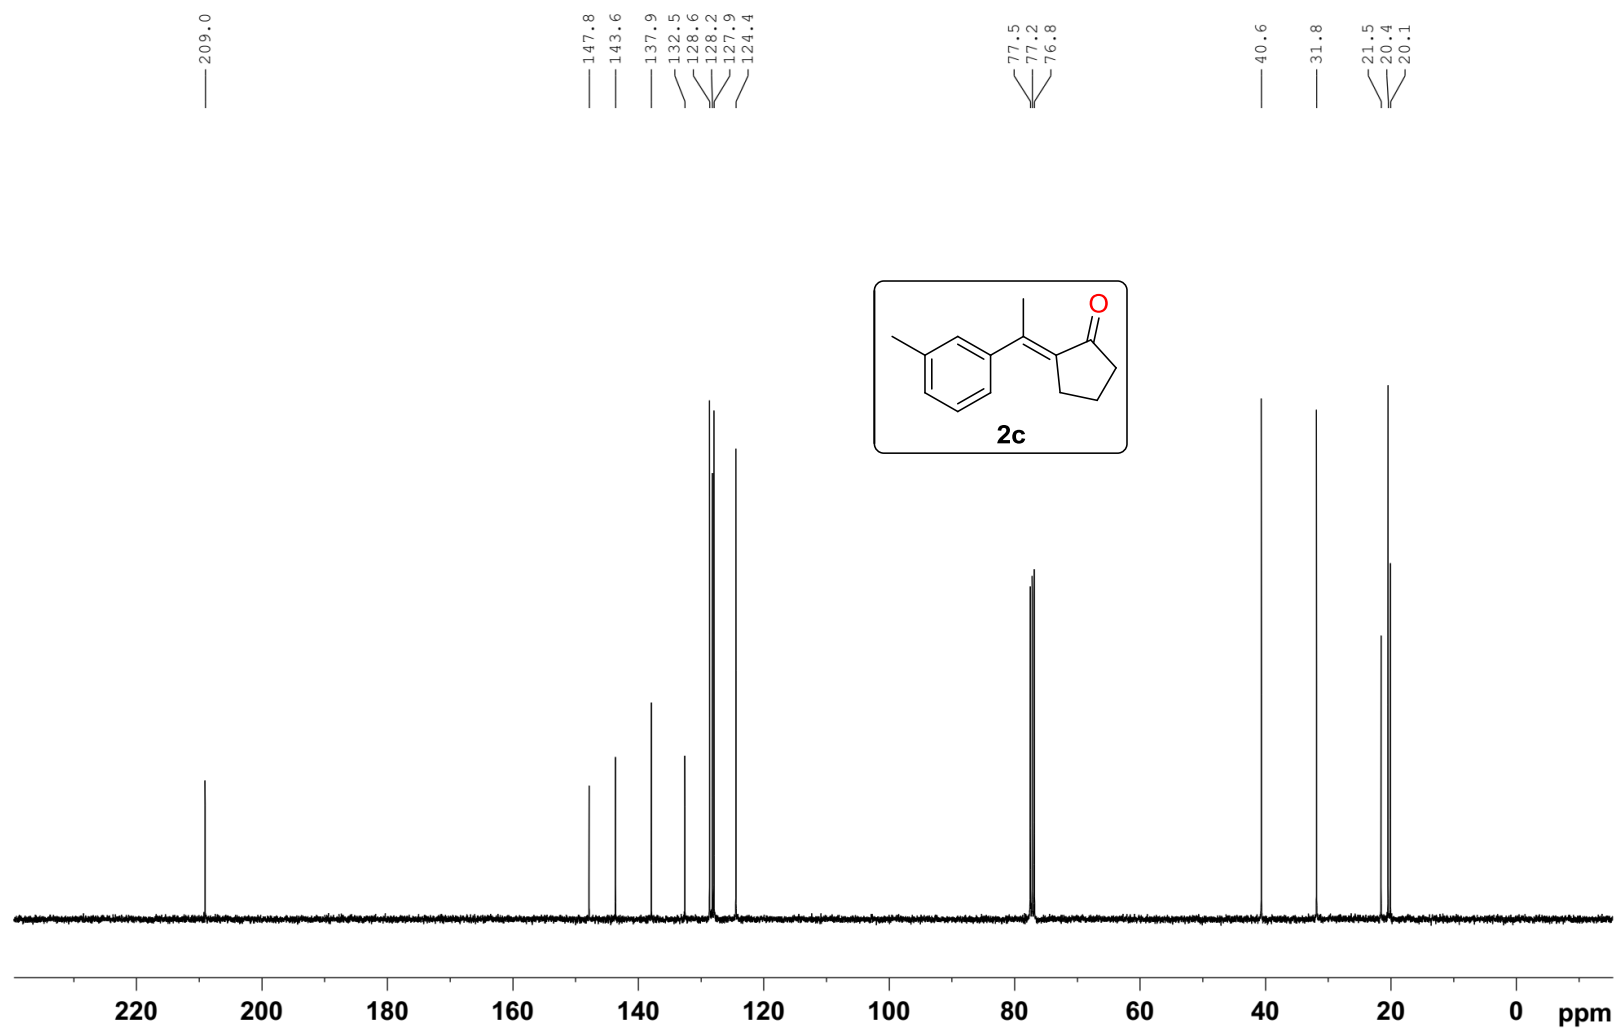

GB-X180308-1-4-2Me-HNMR

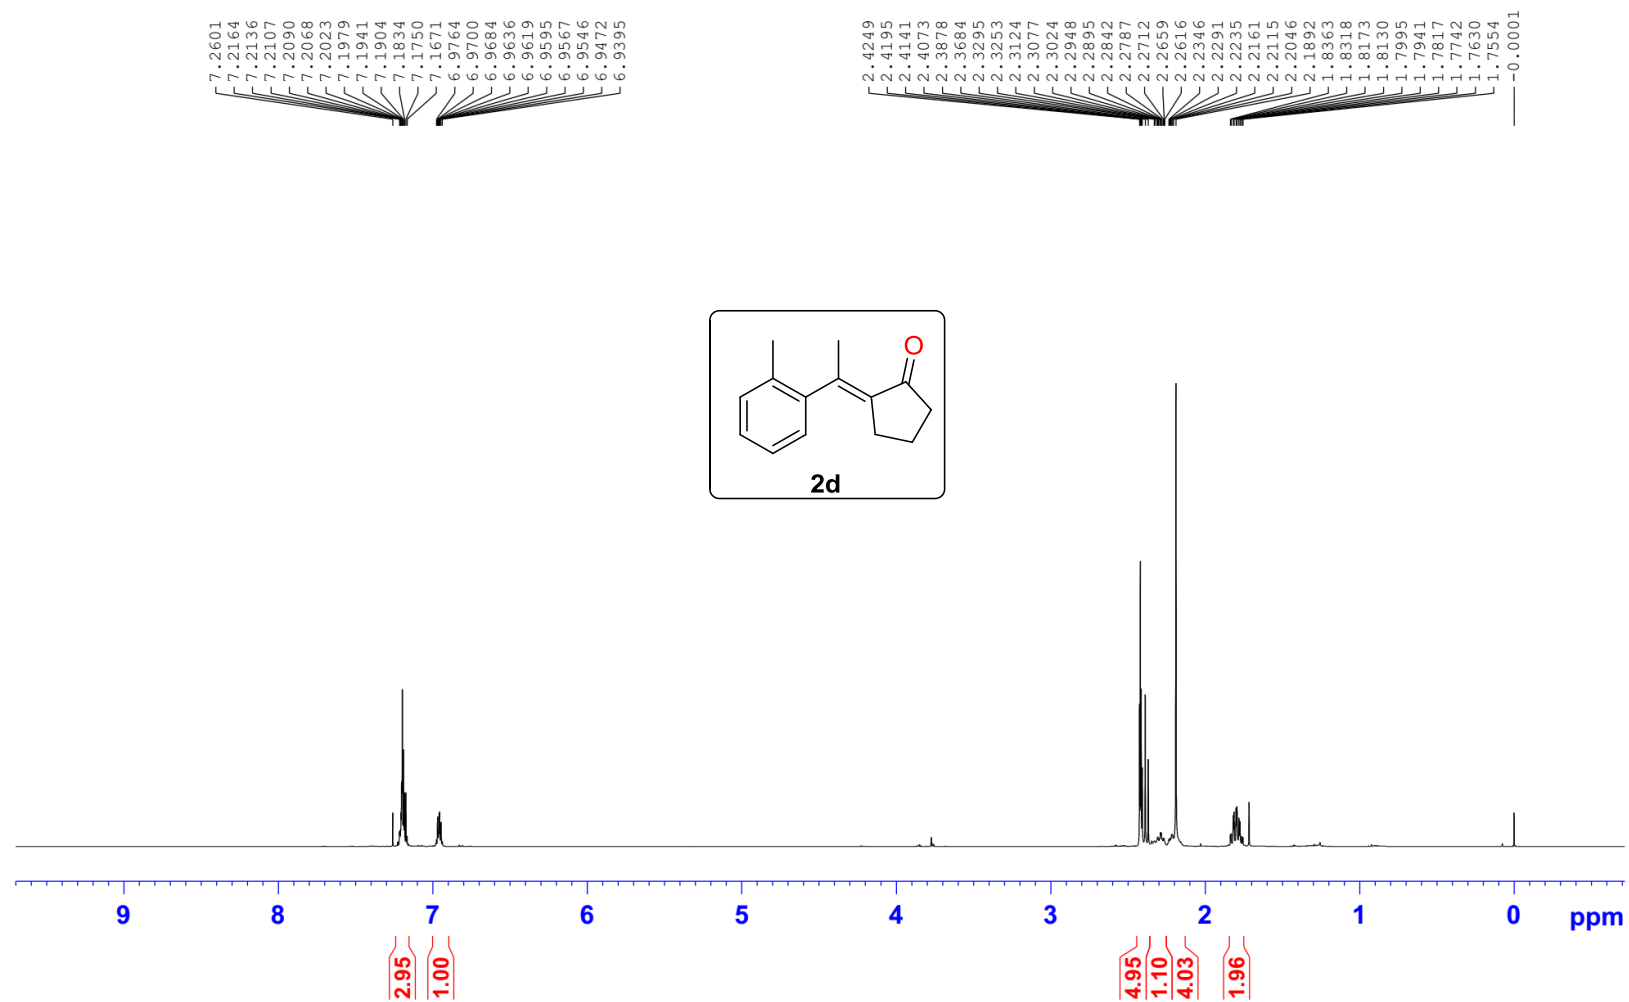

GB-X180308-1-4-2Me-CNMR

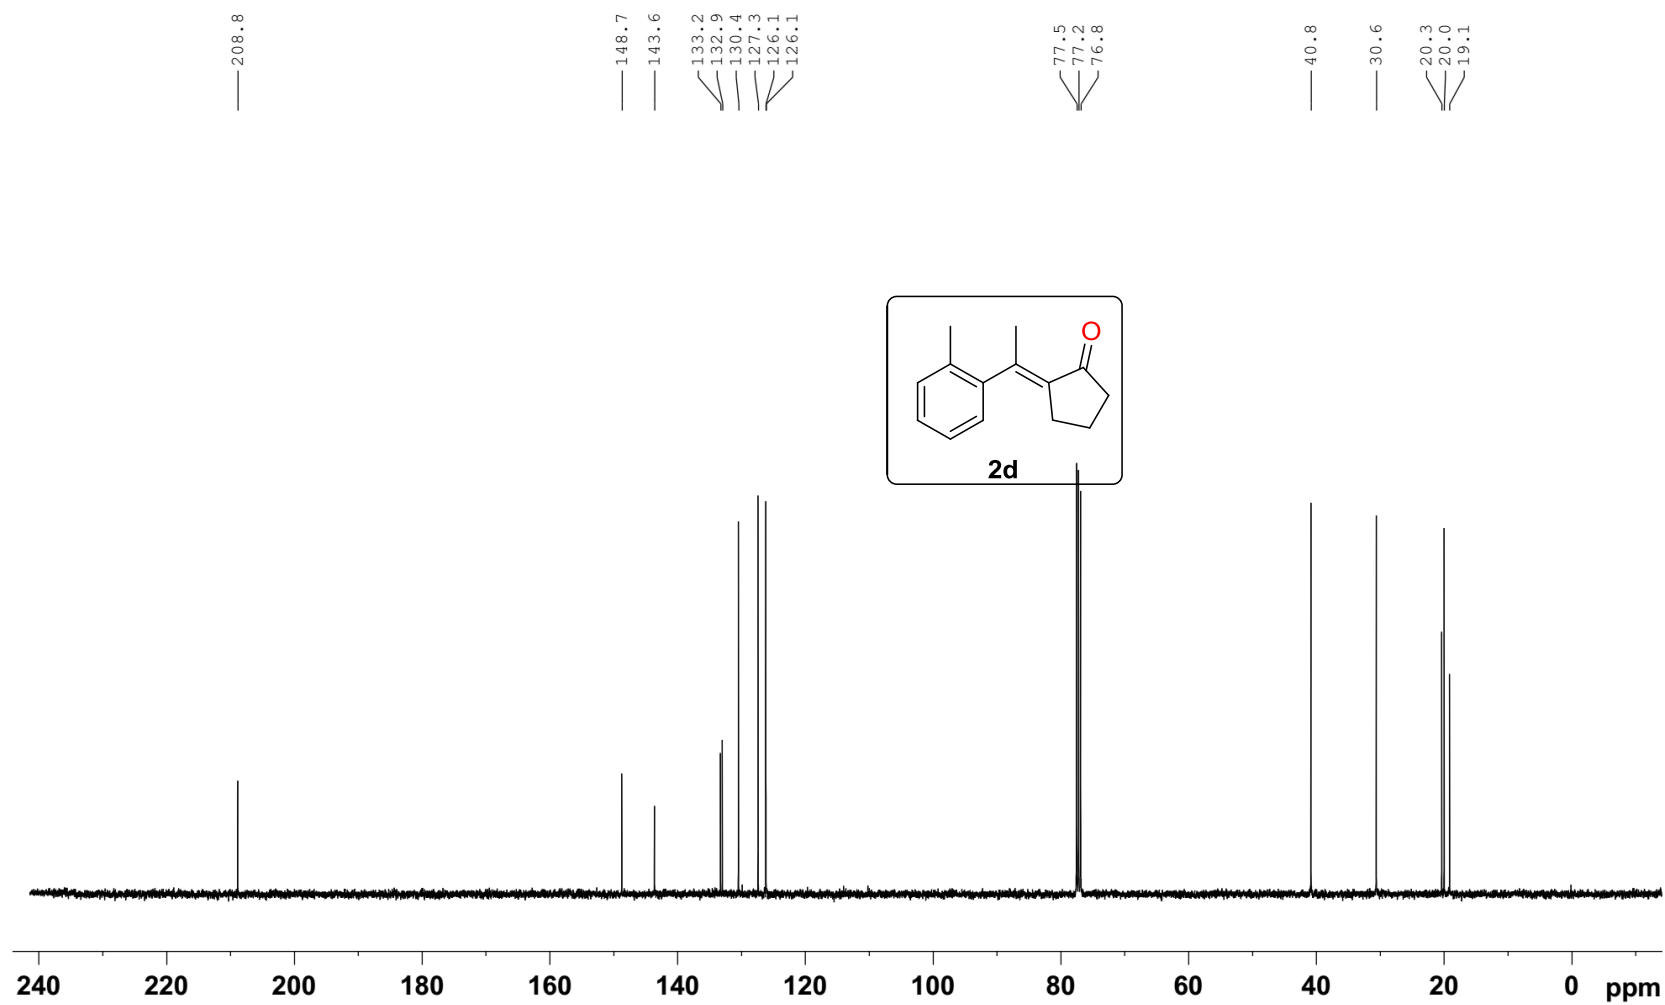

GB-X180129-1-4-HNMR

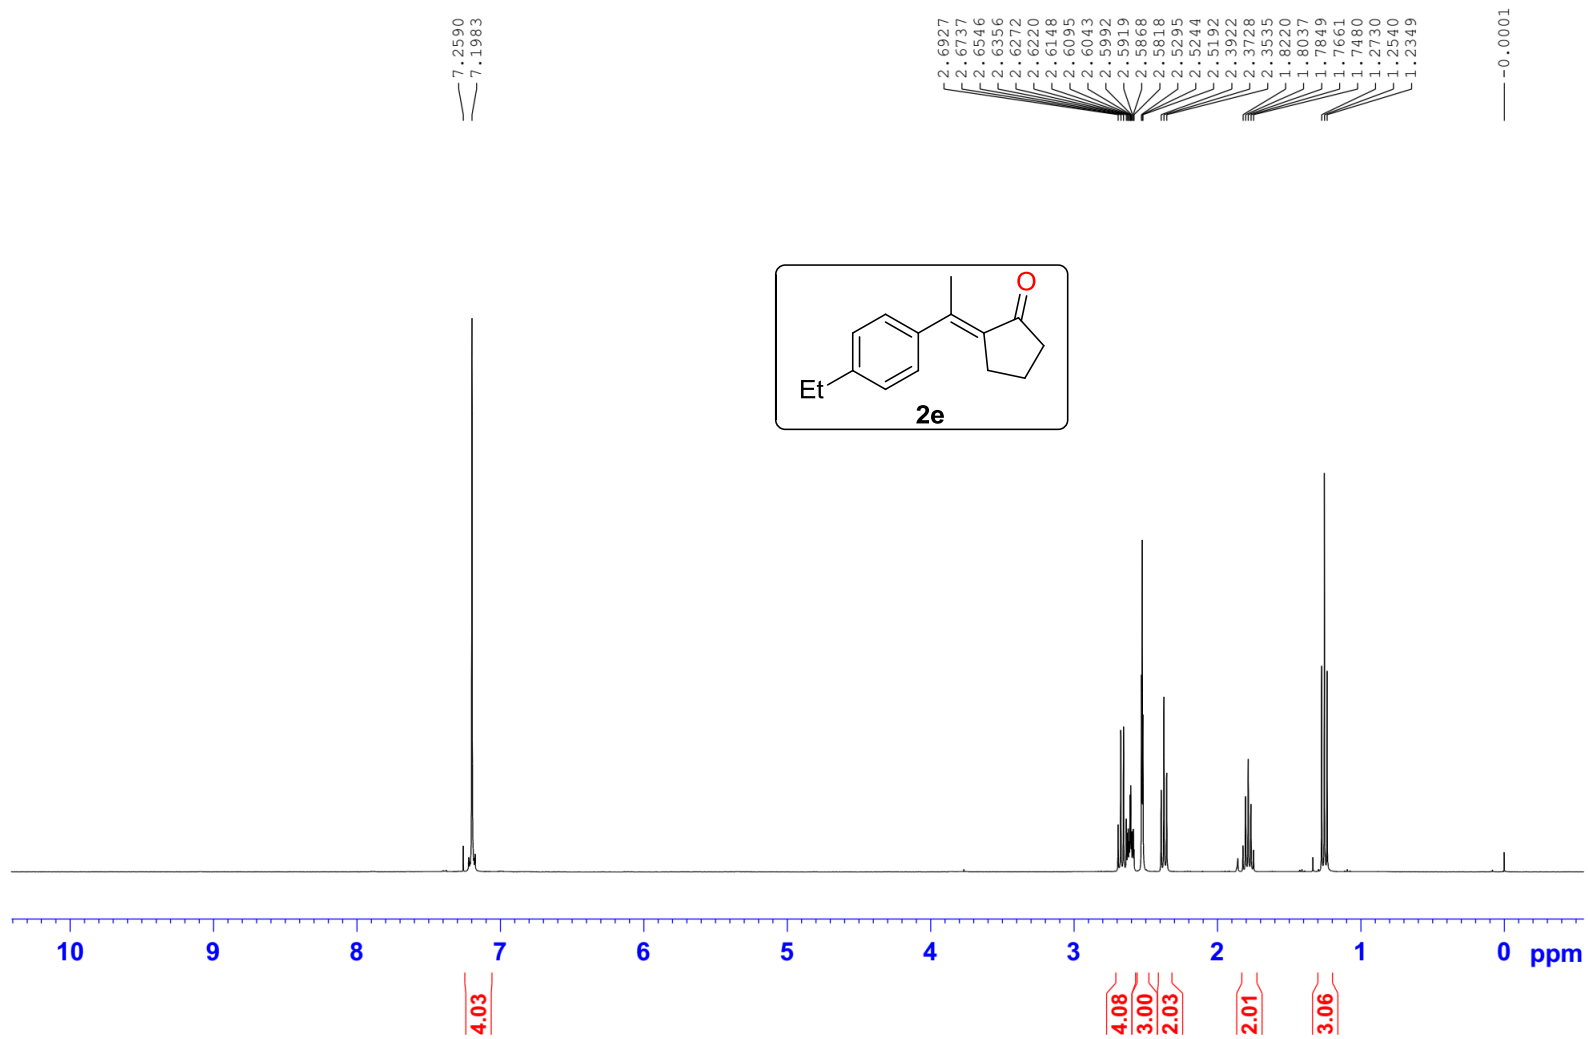

GB-X180129-1-4-4Et-CNMR

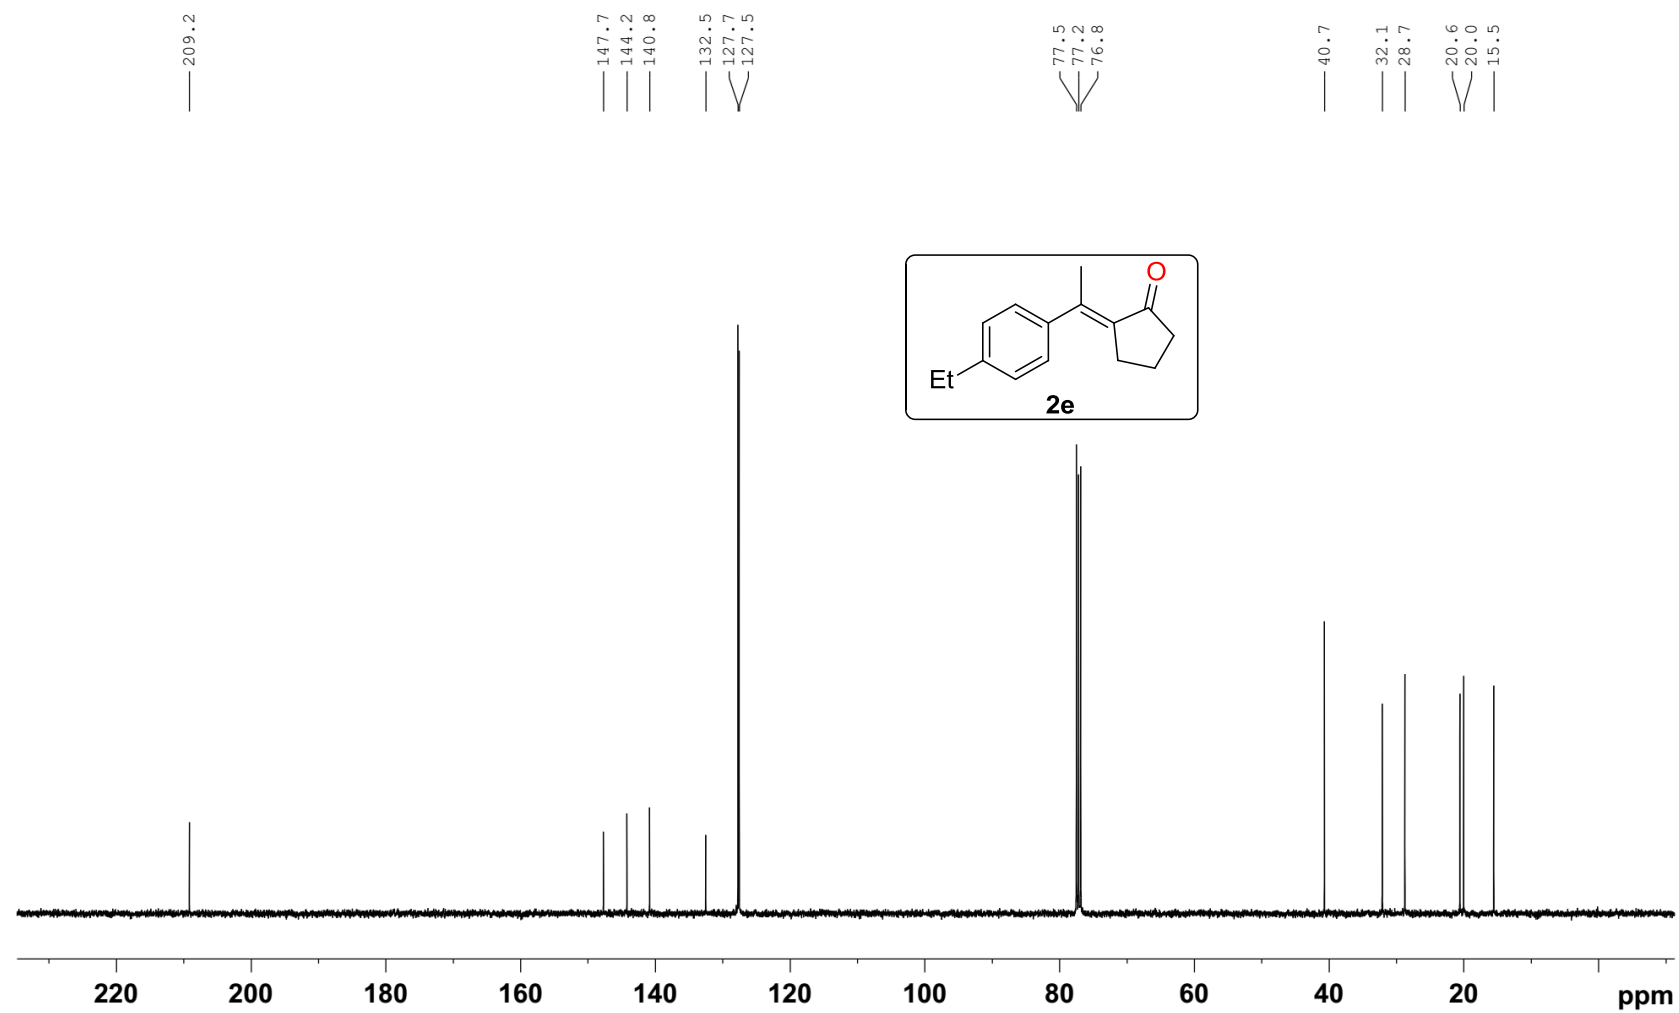

GB-X180129-1-5-HNMR

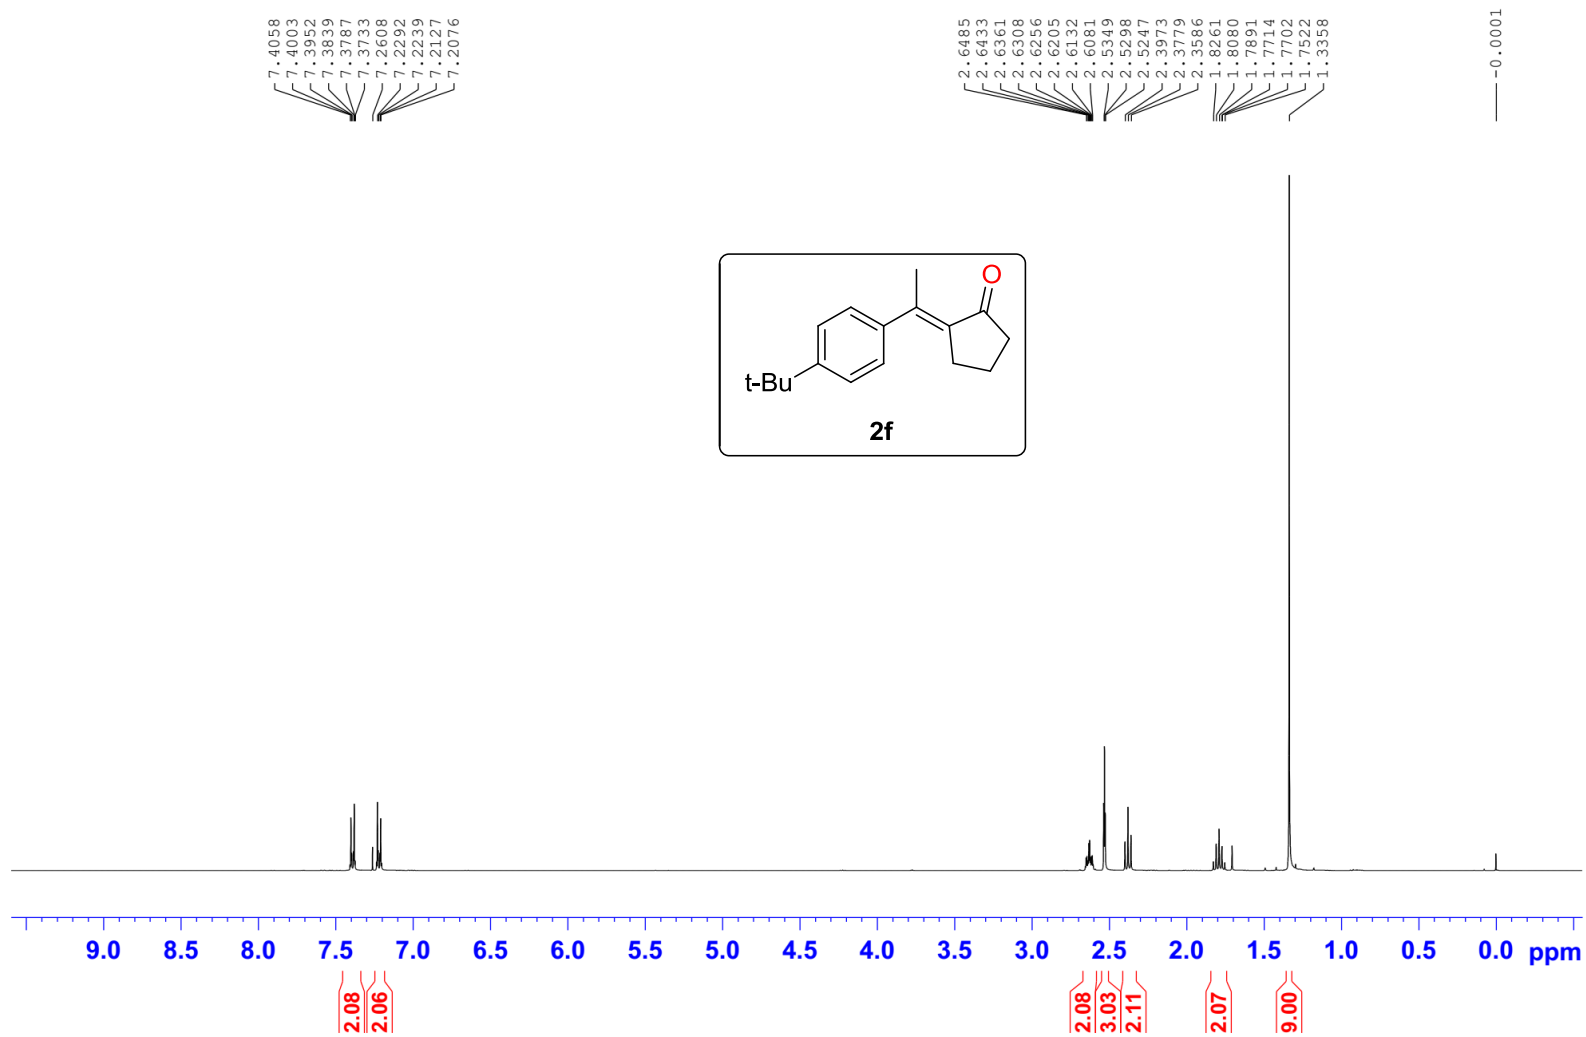

GB-X180129-1-5-CNMR

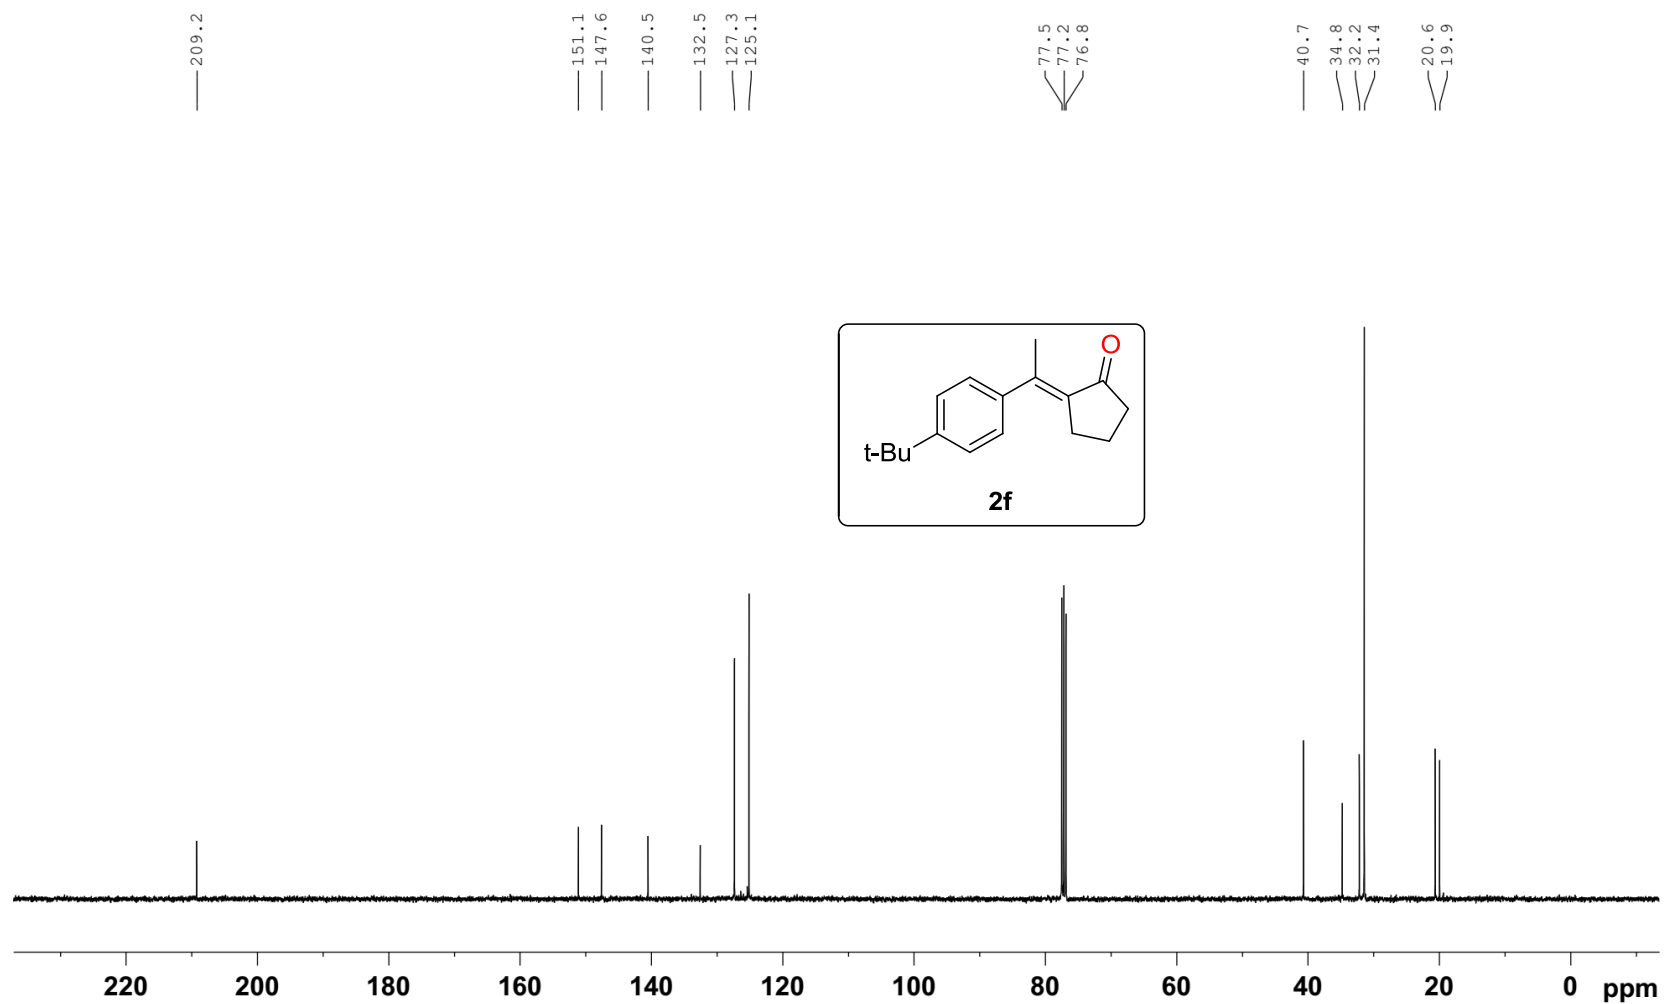

GB-X180614-4MeO-HNMR

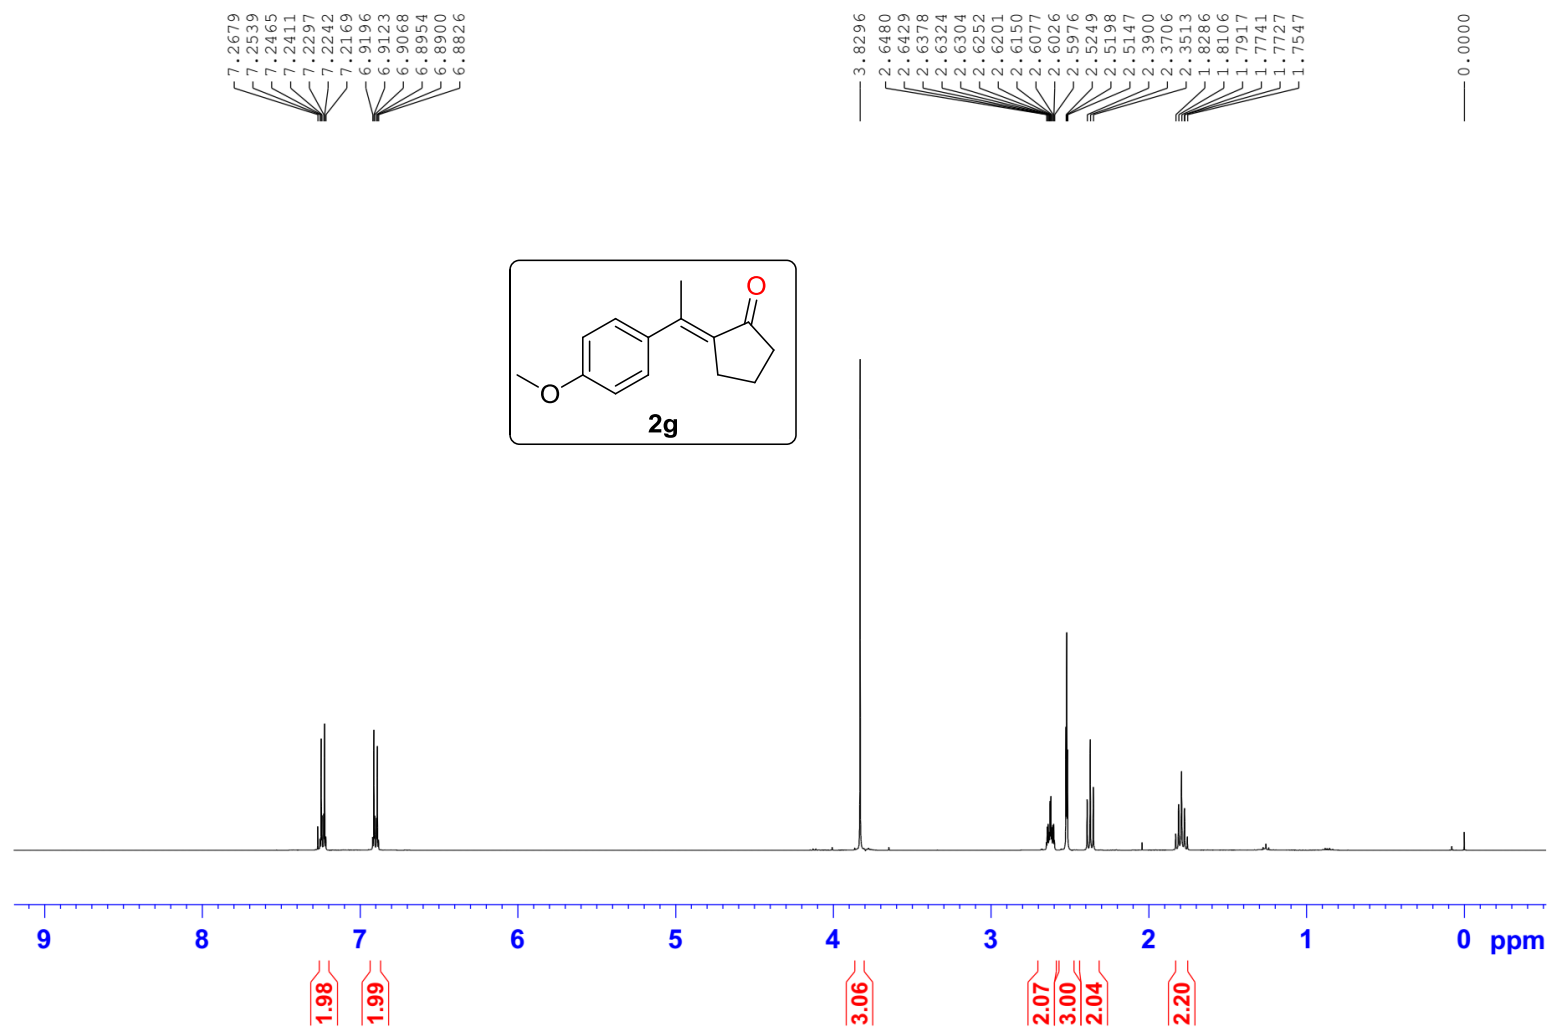



GB-X180614-4MeO-CNMR

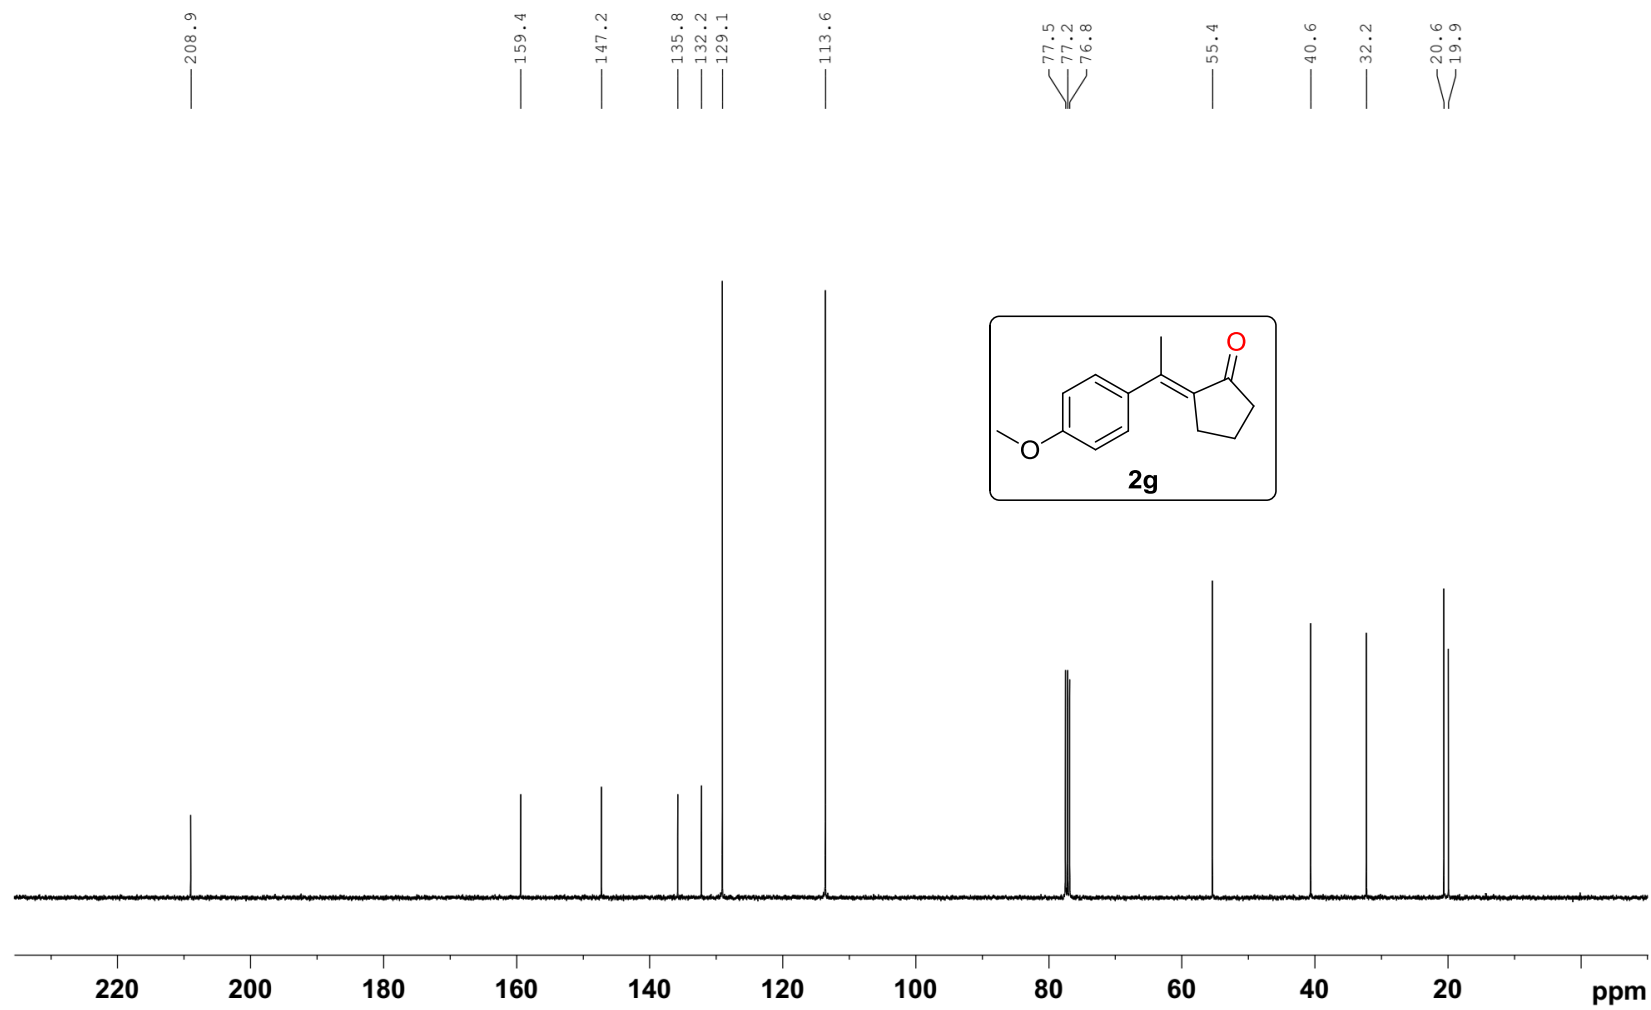

GB-X180402-3-1-4F-HNMR

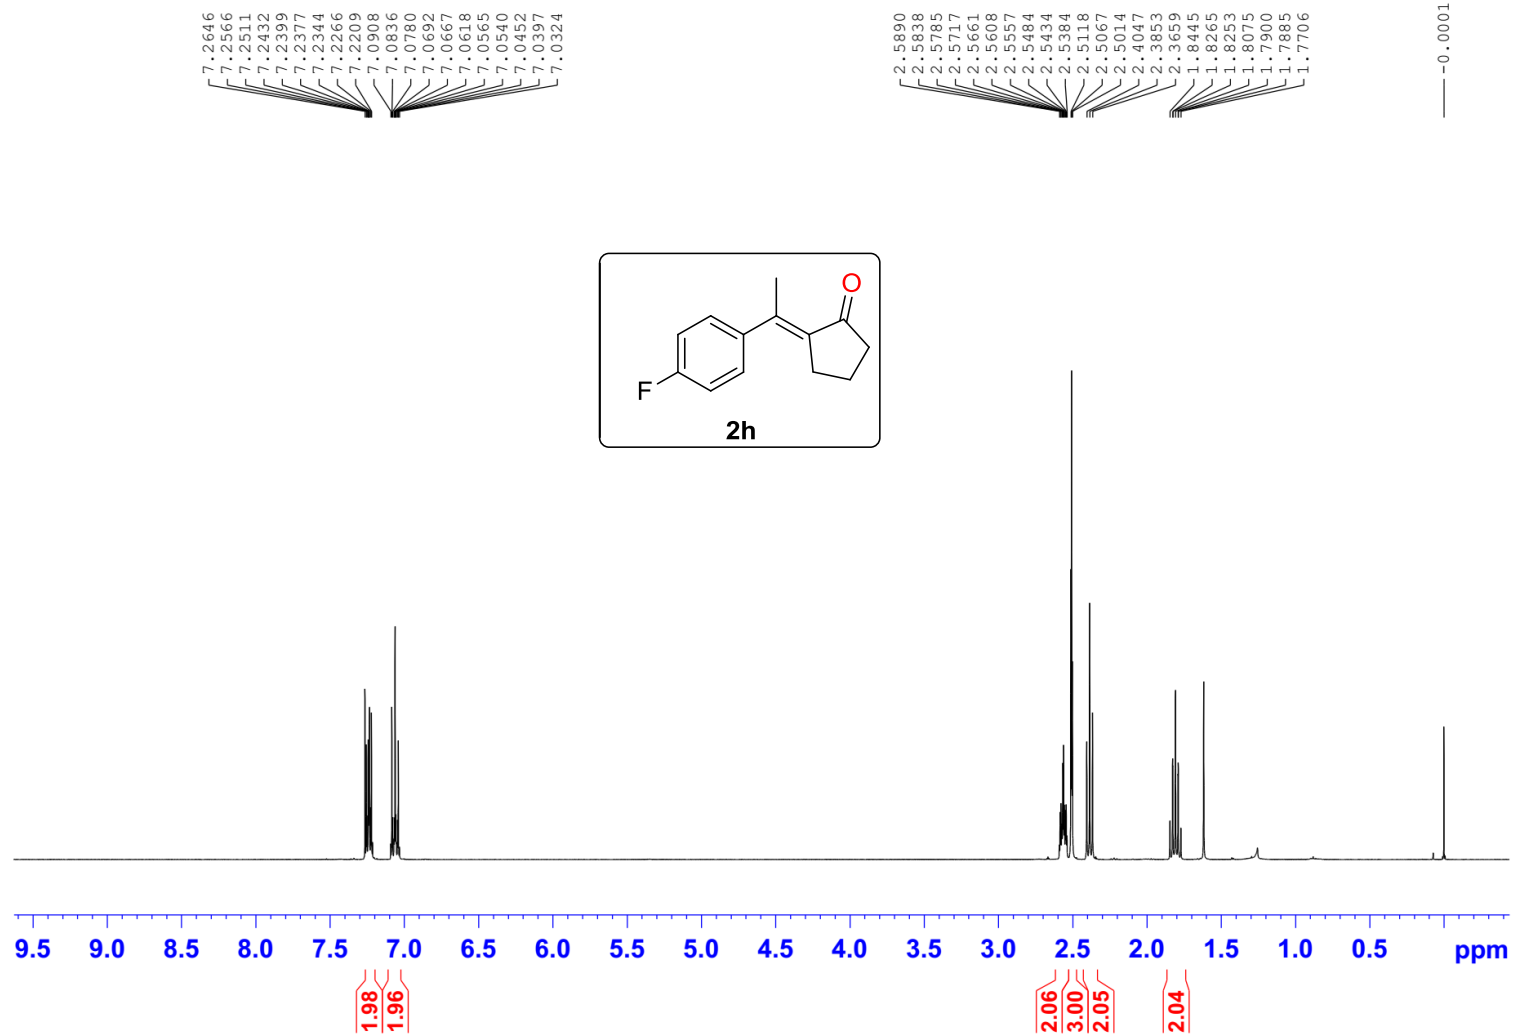

GB-X180402-3-1-4F-CNMR

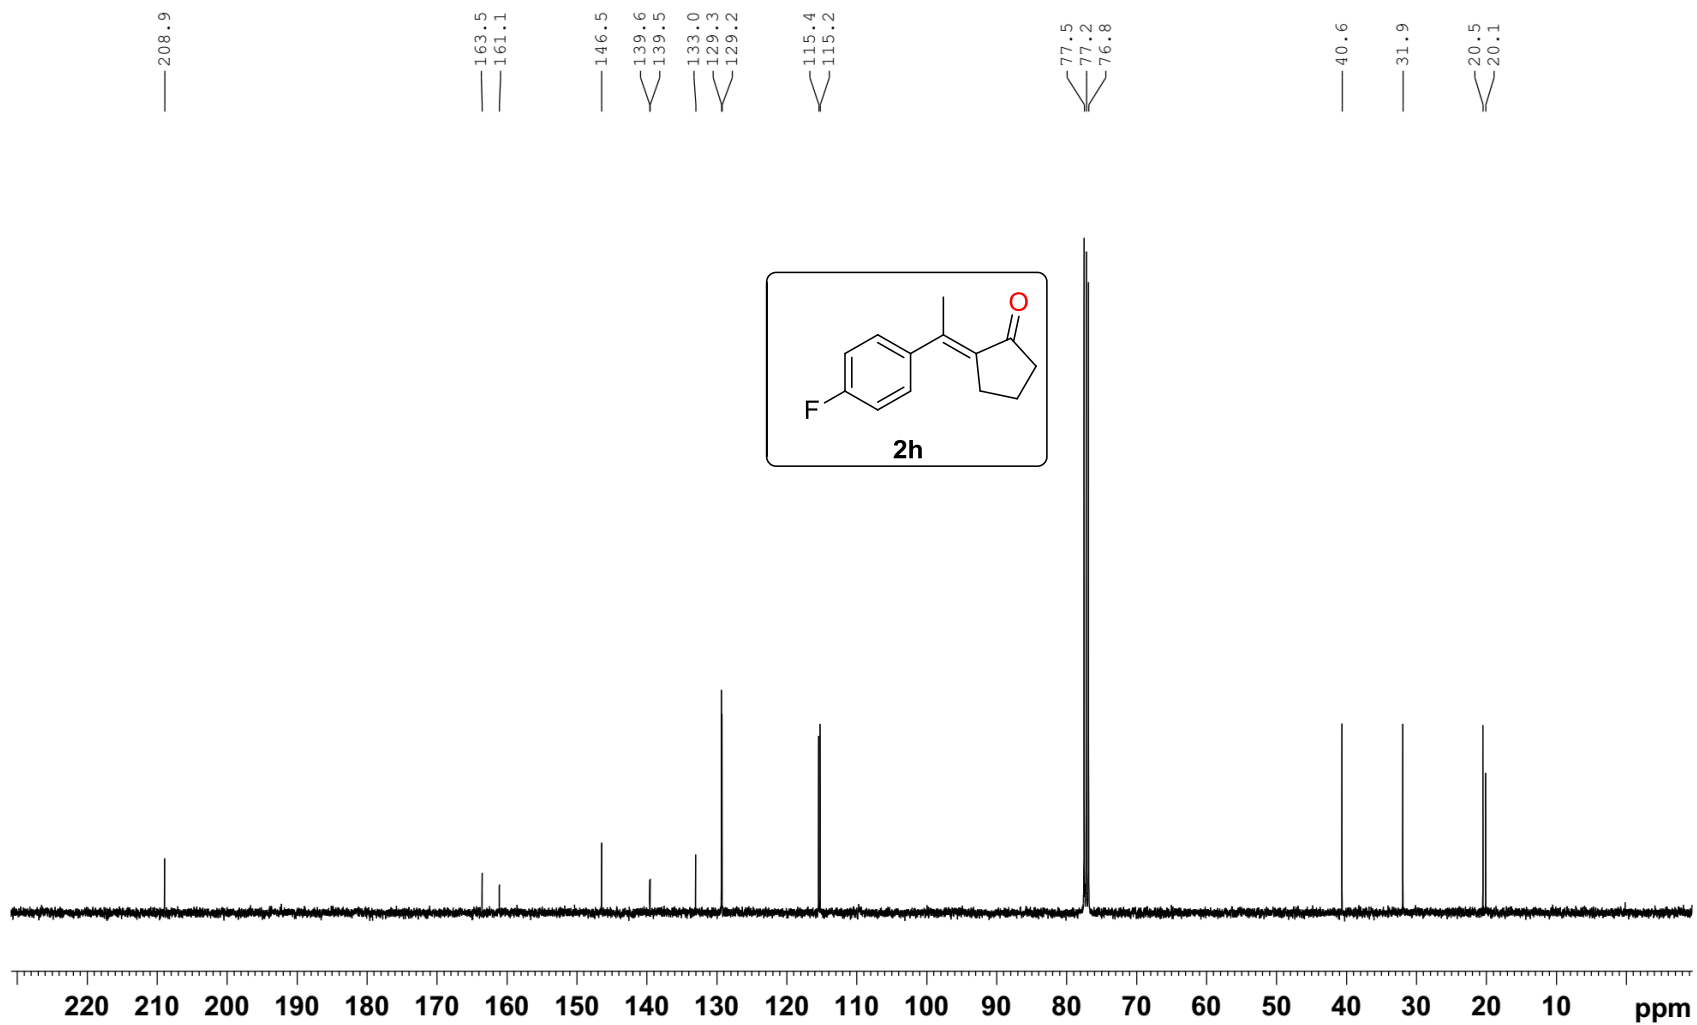

GB-X180402-3-1-4F-FNMR

— -113.6212

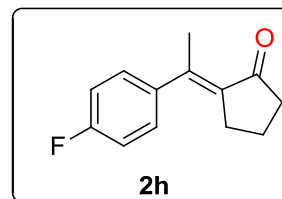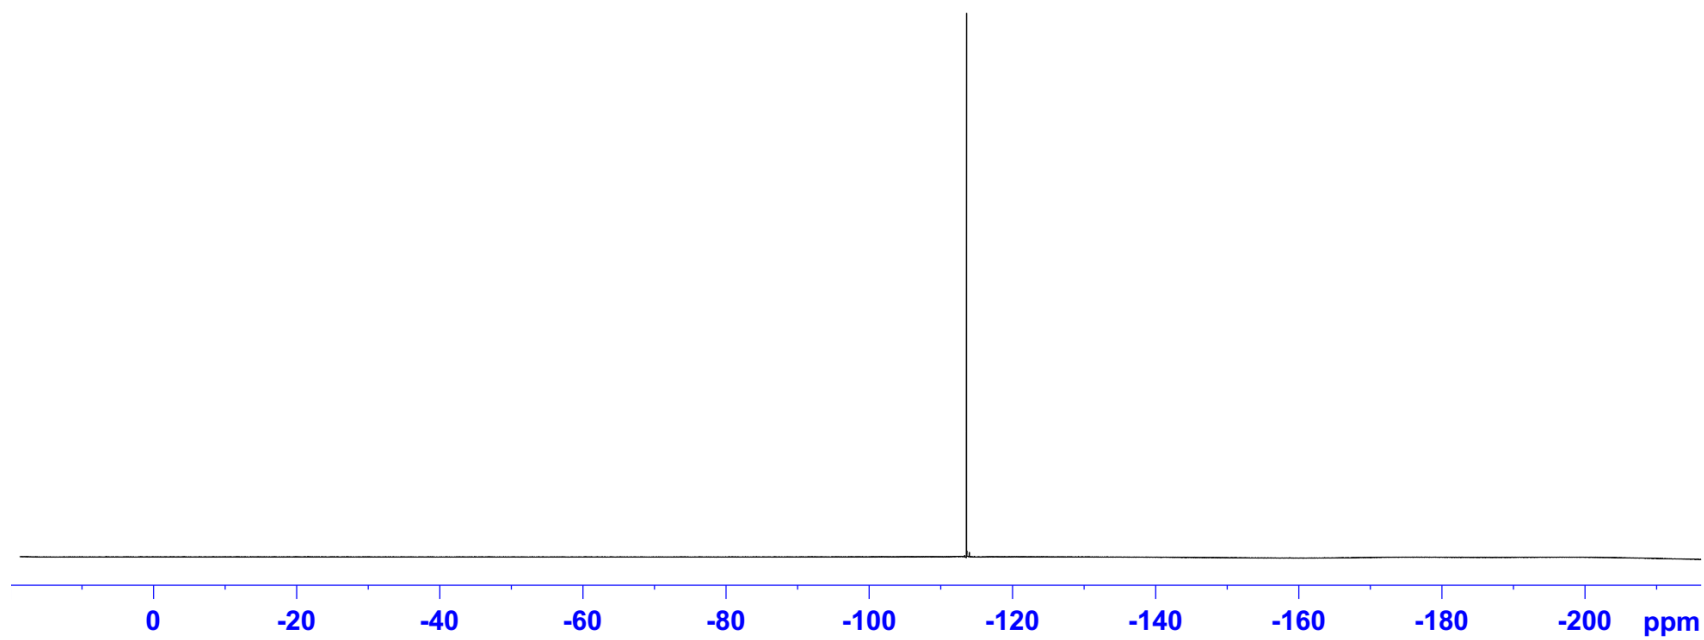

GB-X180129-1-7-4Cl-HNMR

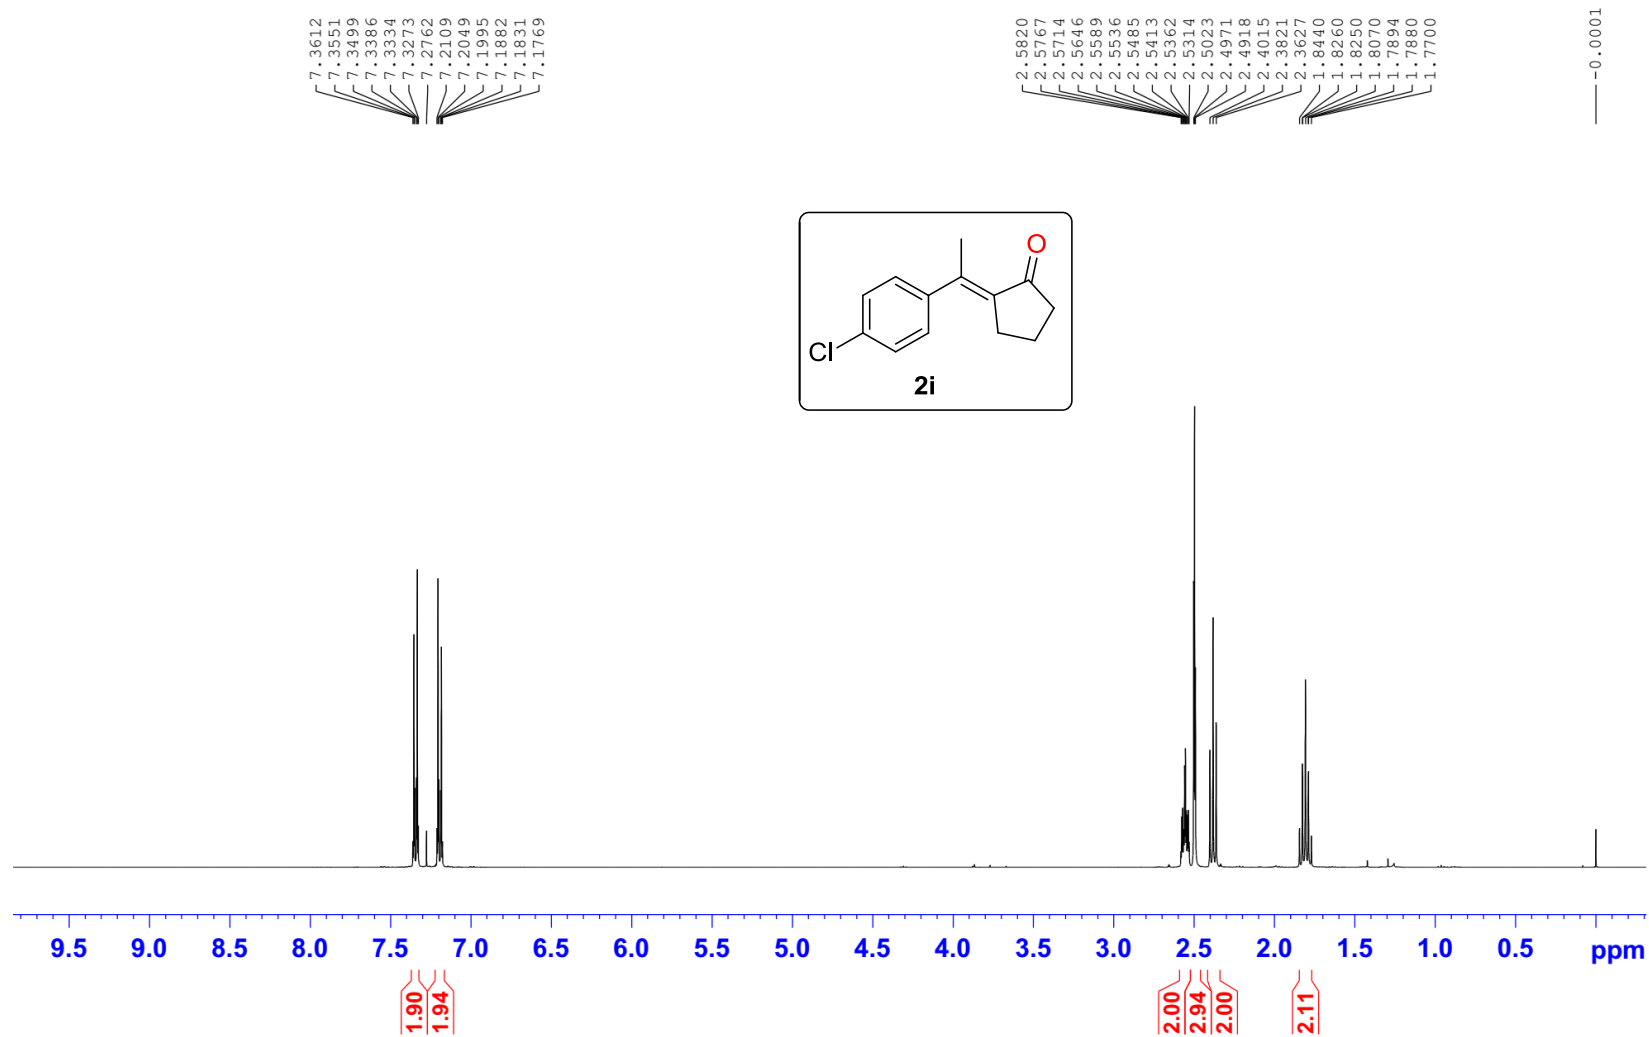

GB-X180129-1-7-4C1-CNMR

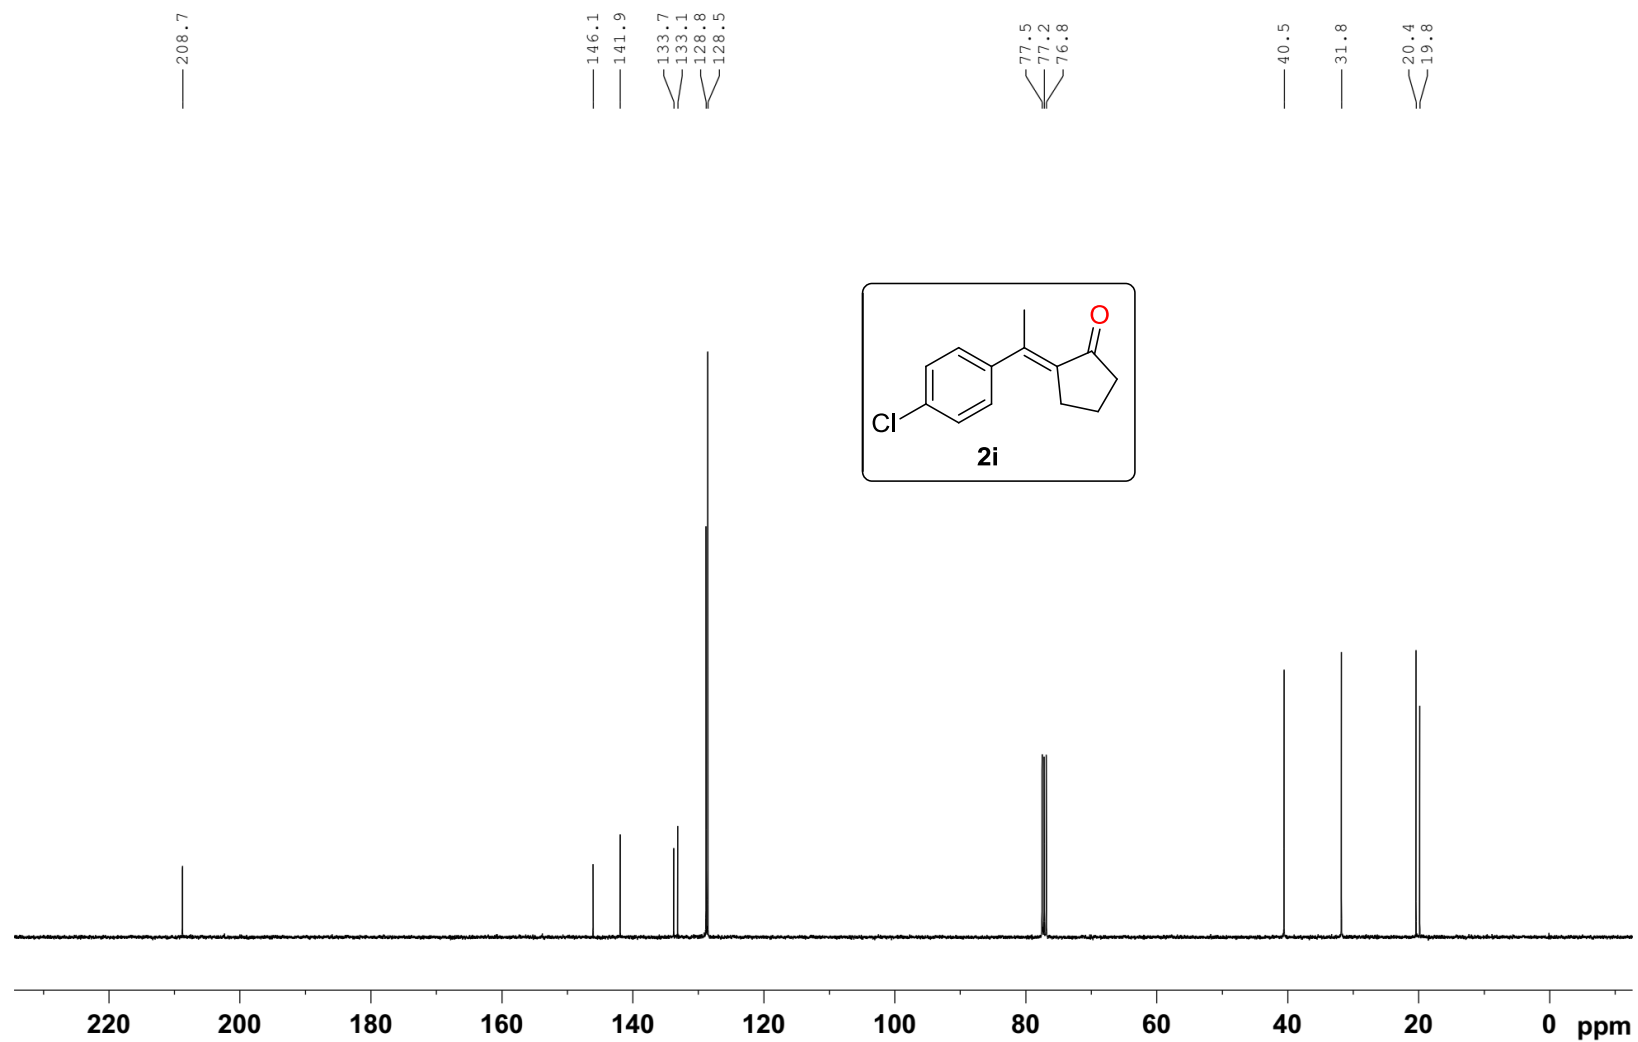

GB-X180614-4Br-HNMR

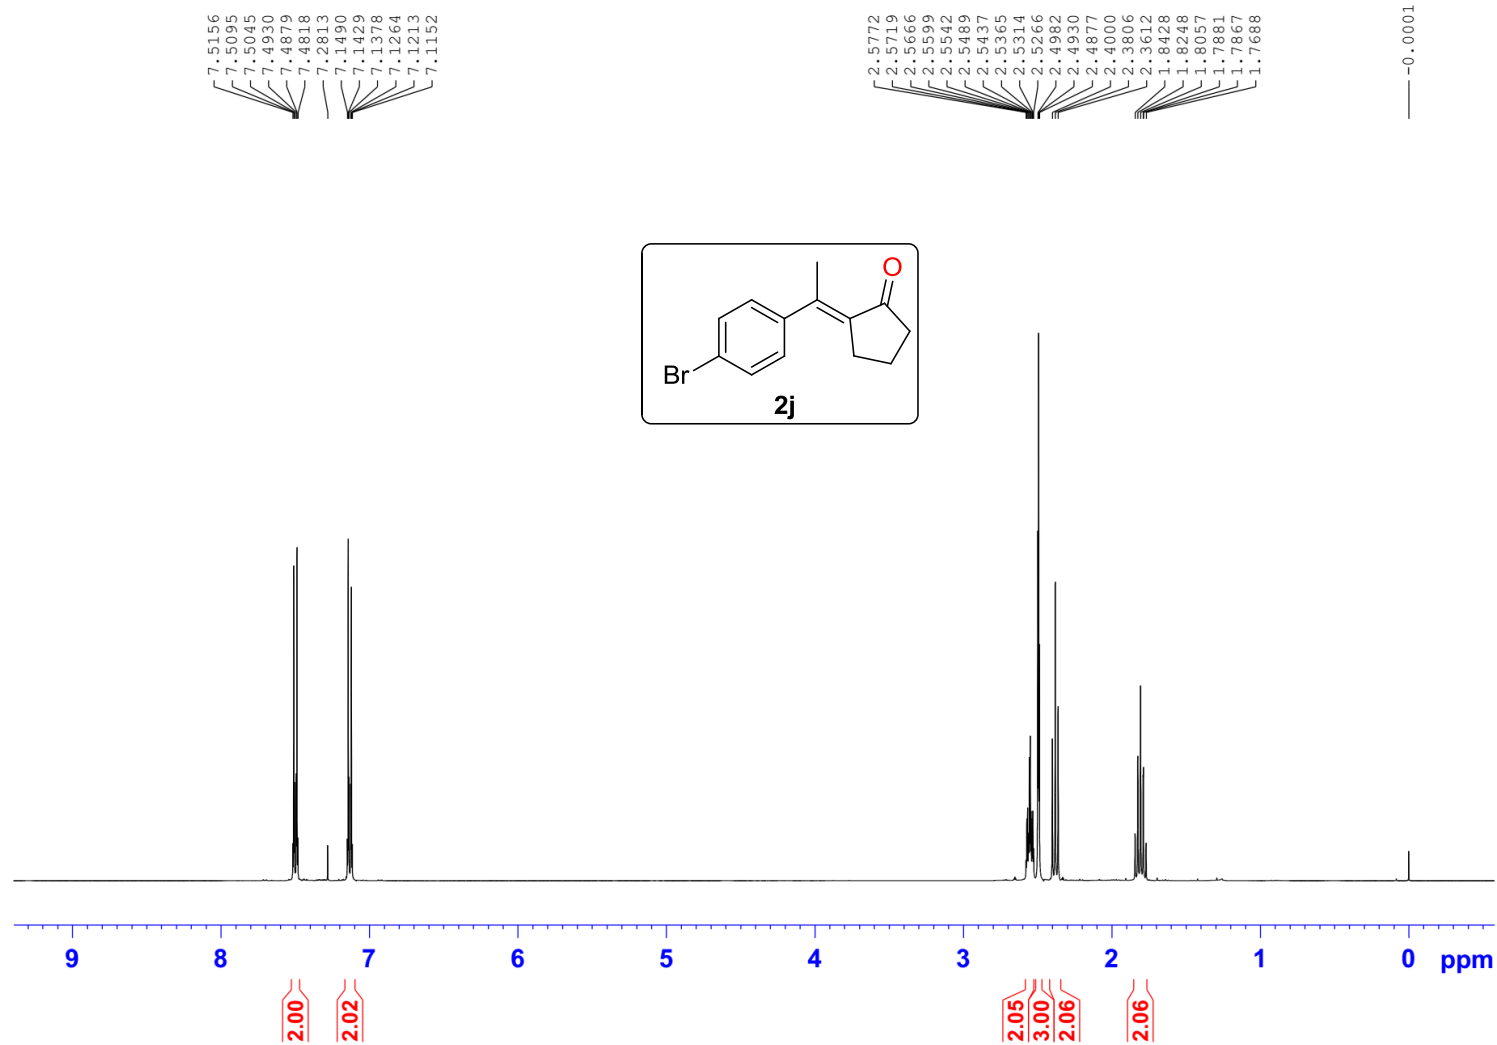

GB-X180614-4Br-CNMR

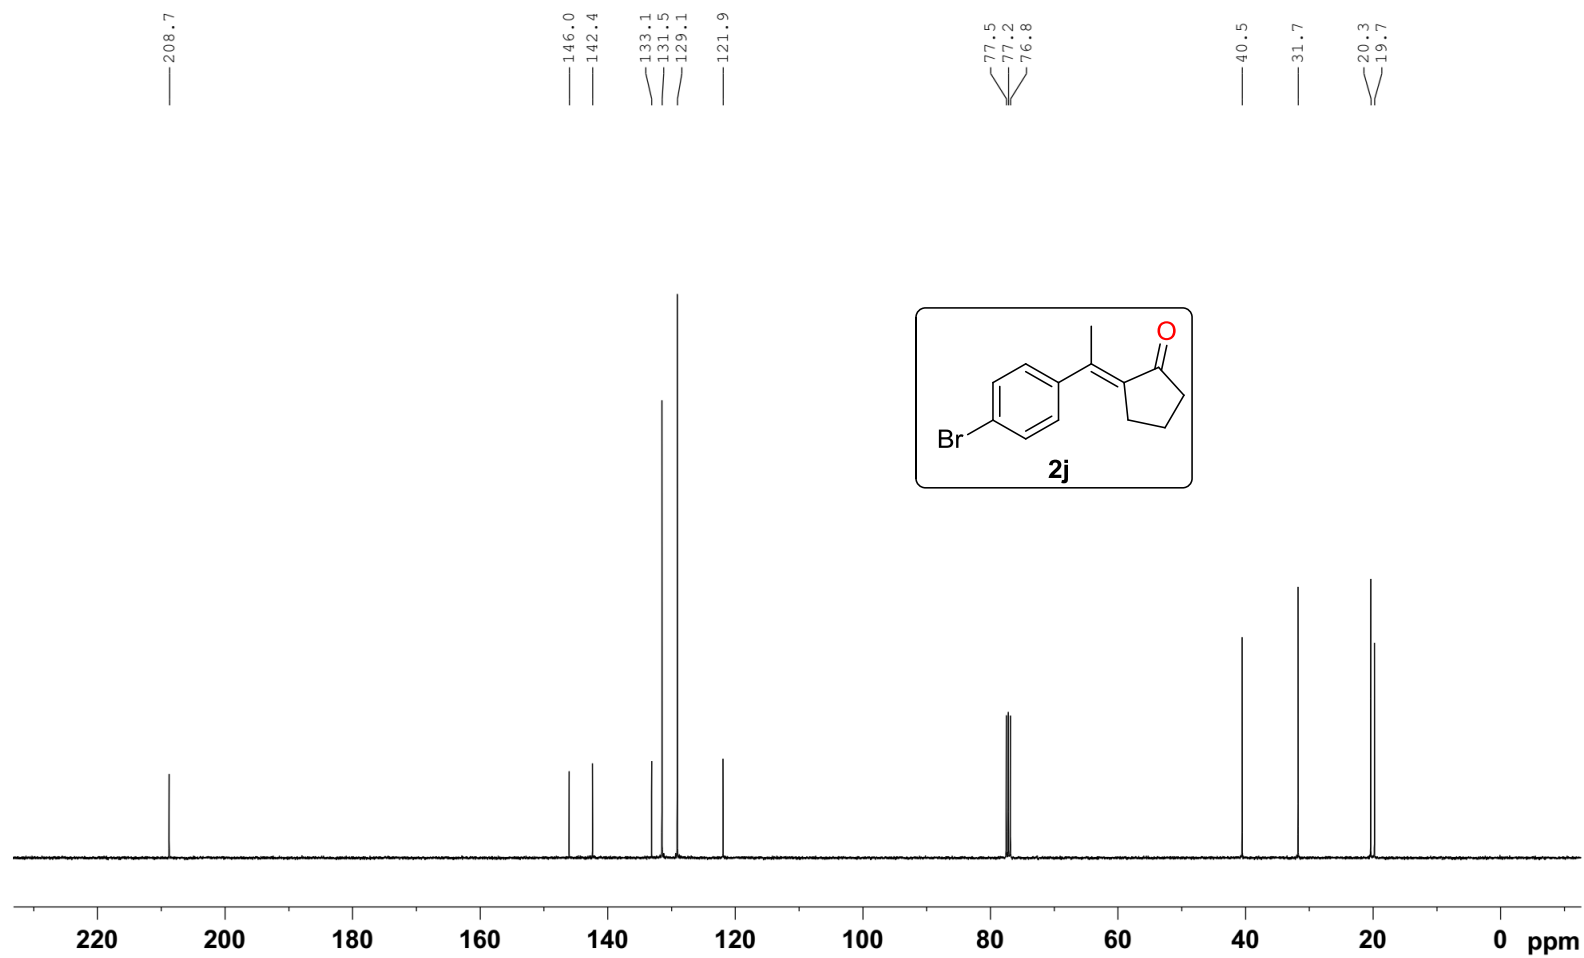



zsc-x180711-5-CDCl<sub>3</sub>-HNMR

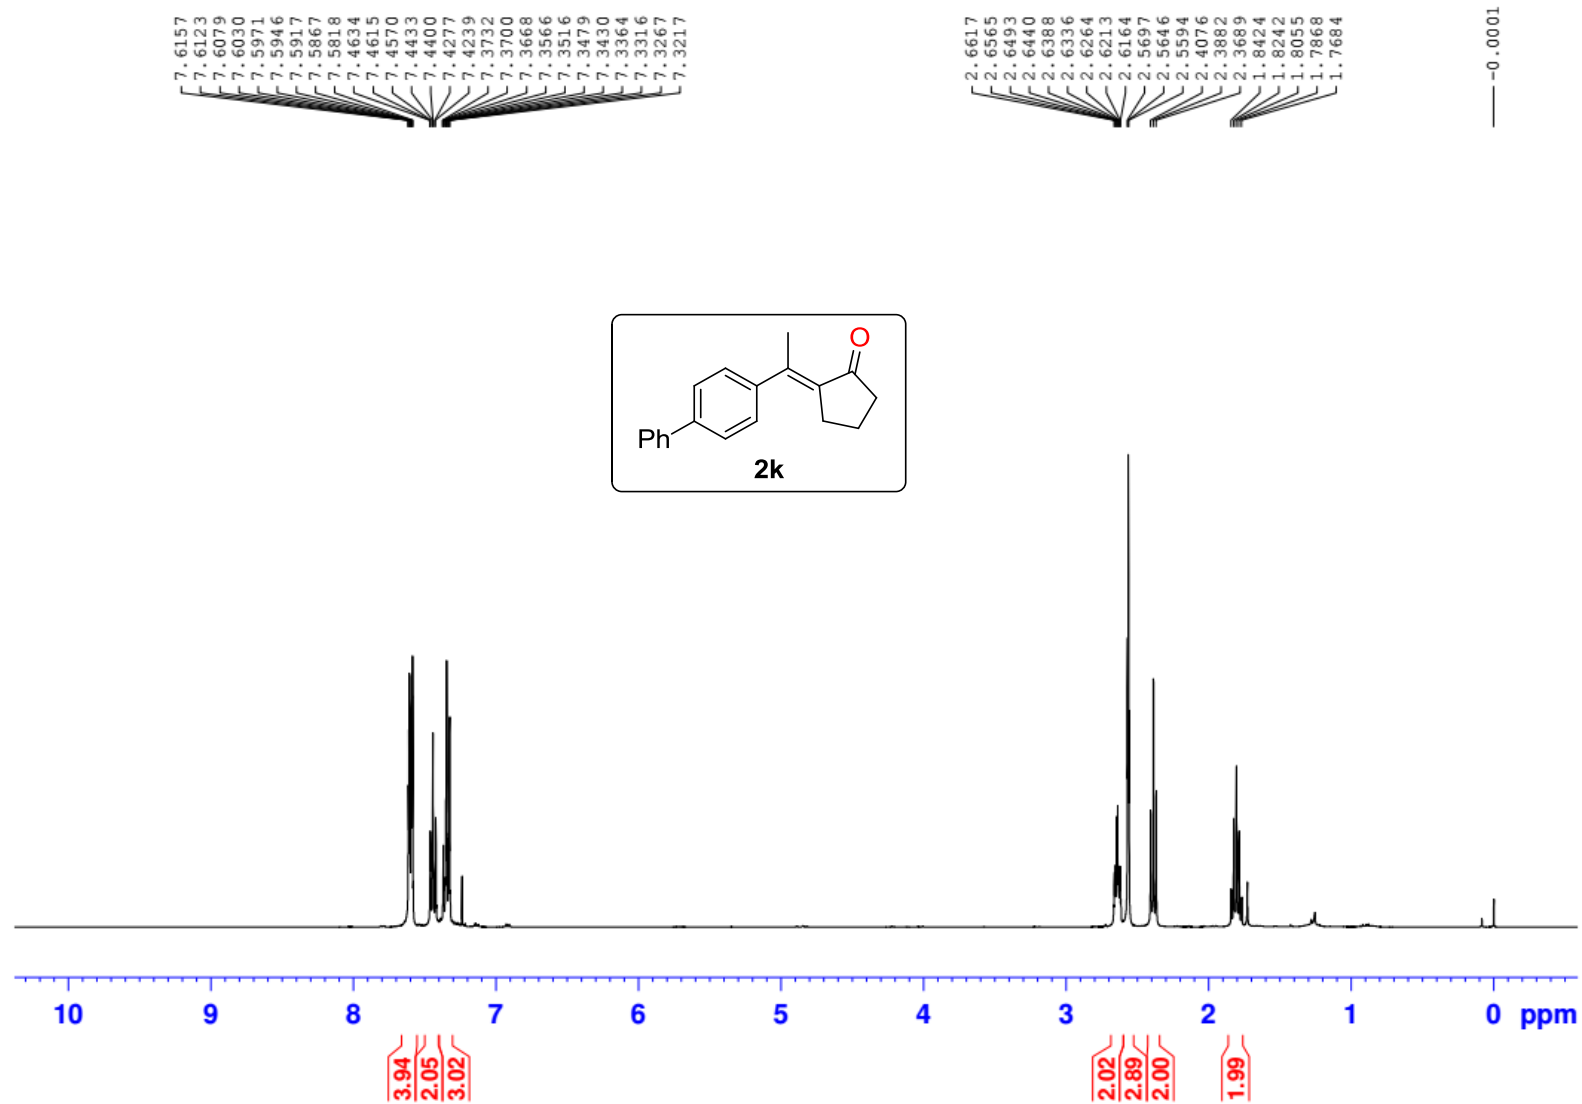

ZSC-X180711-1-5-CDCl<sub>3</sub>-CNMR

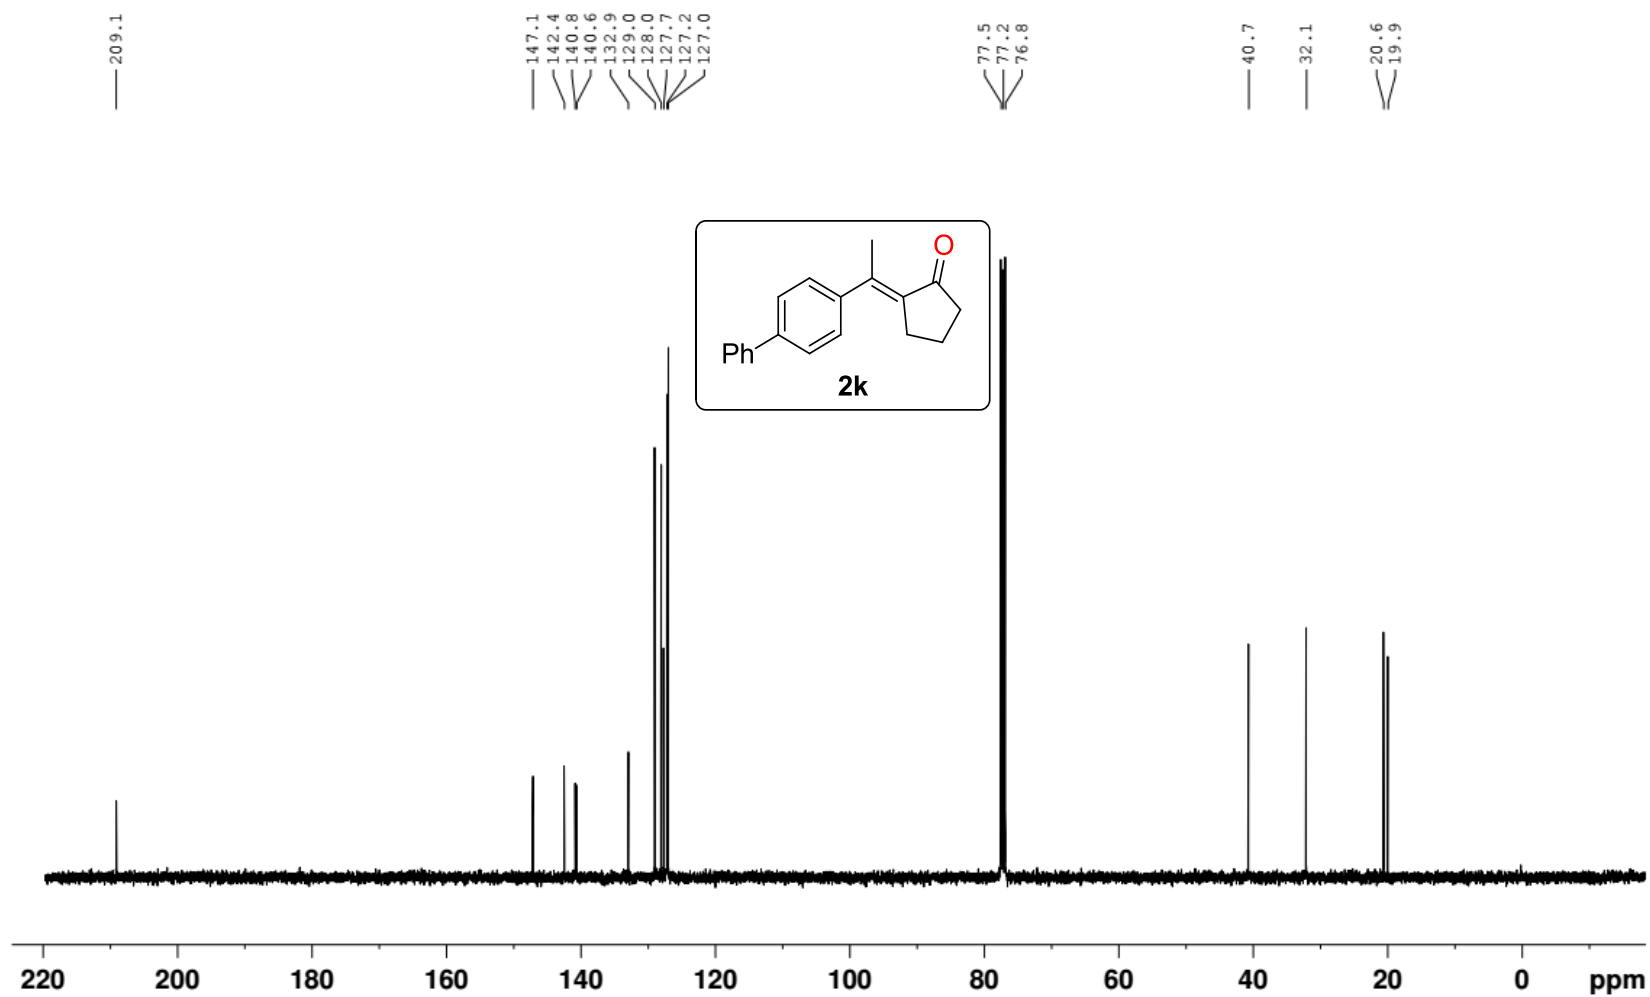

ZSC-X180714-1-CDC13-HNMR

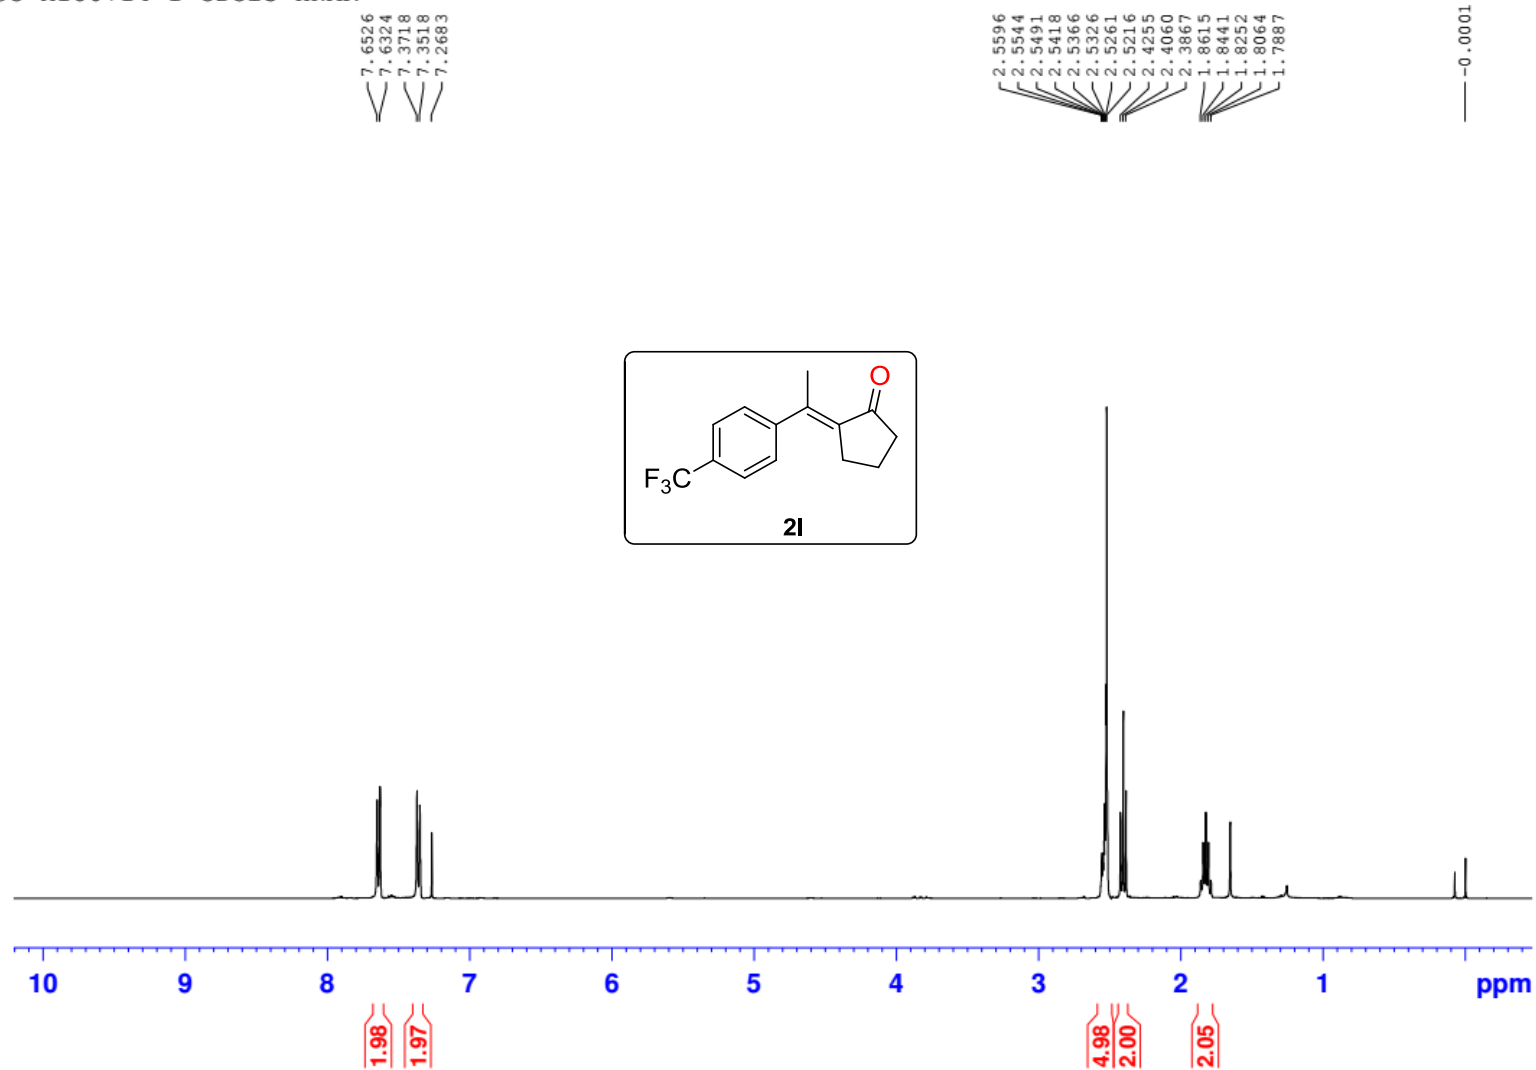

ZSC-X180714-1-CDCl3-CNMR

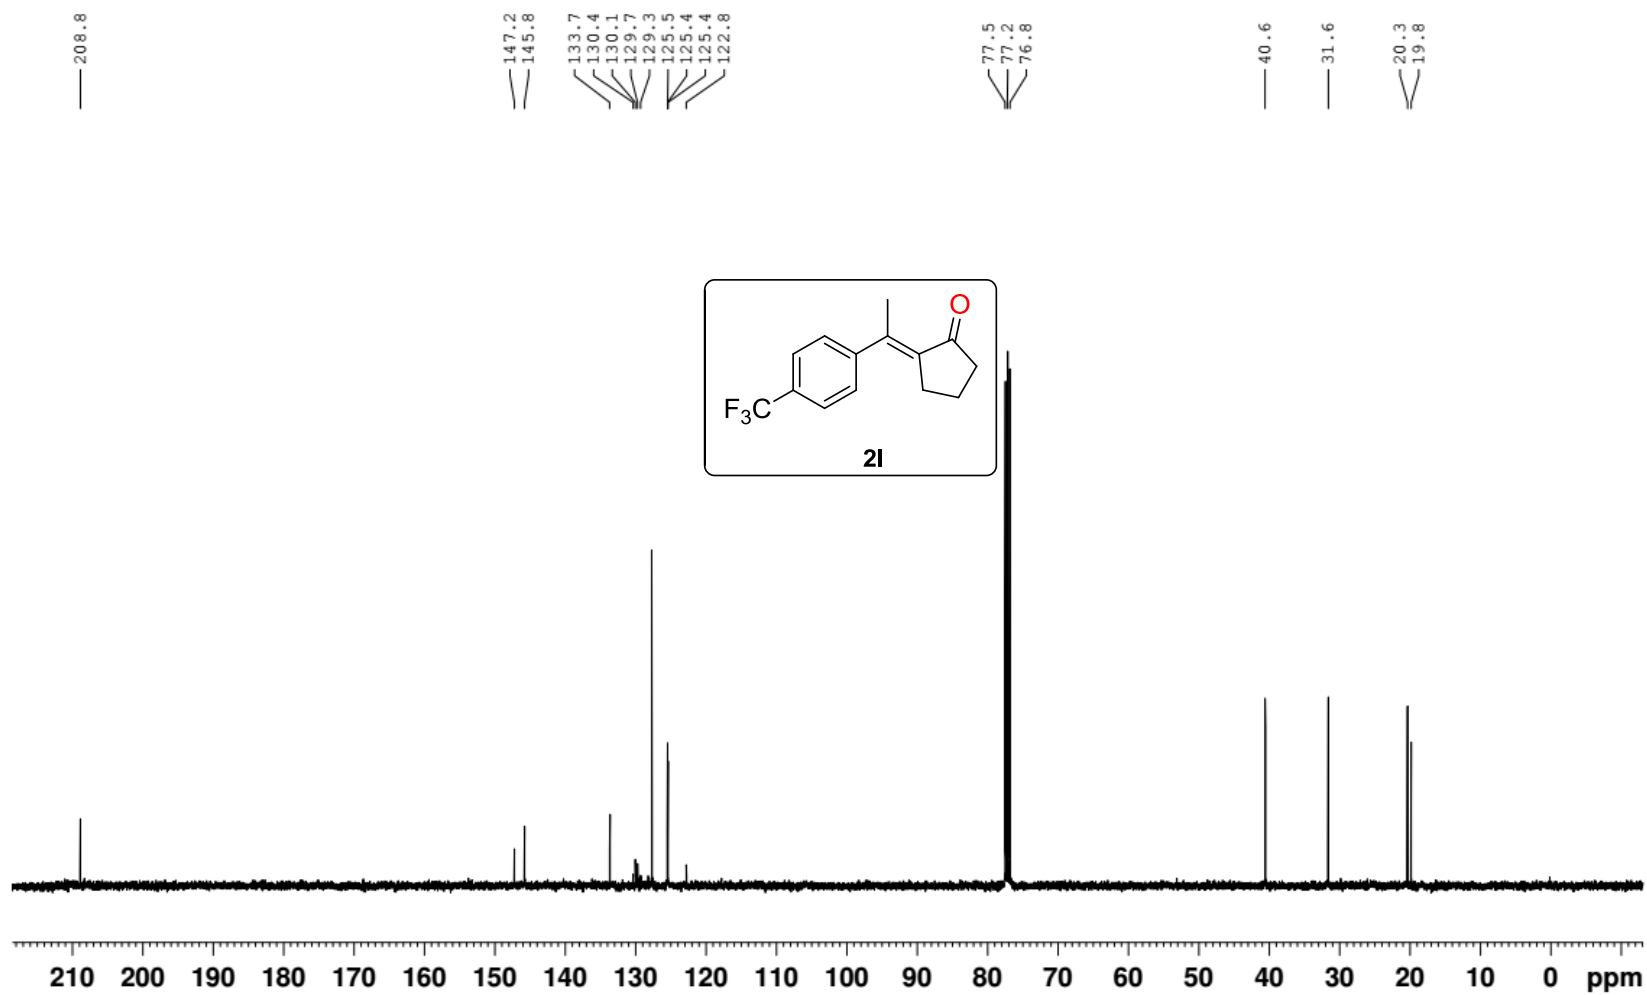

ZSC-X180714-1-CDC13-f-NMR

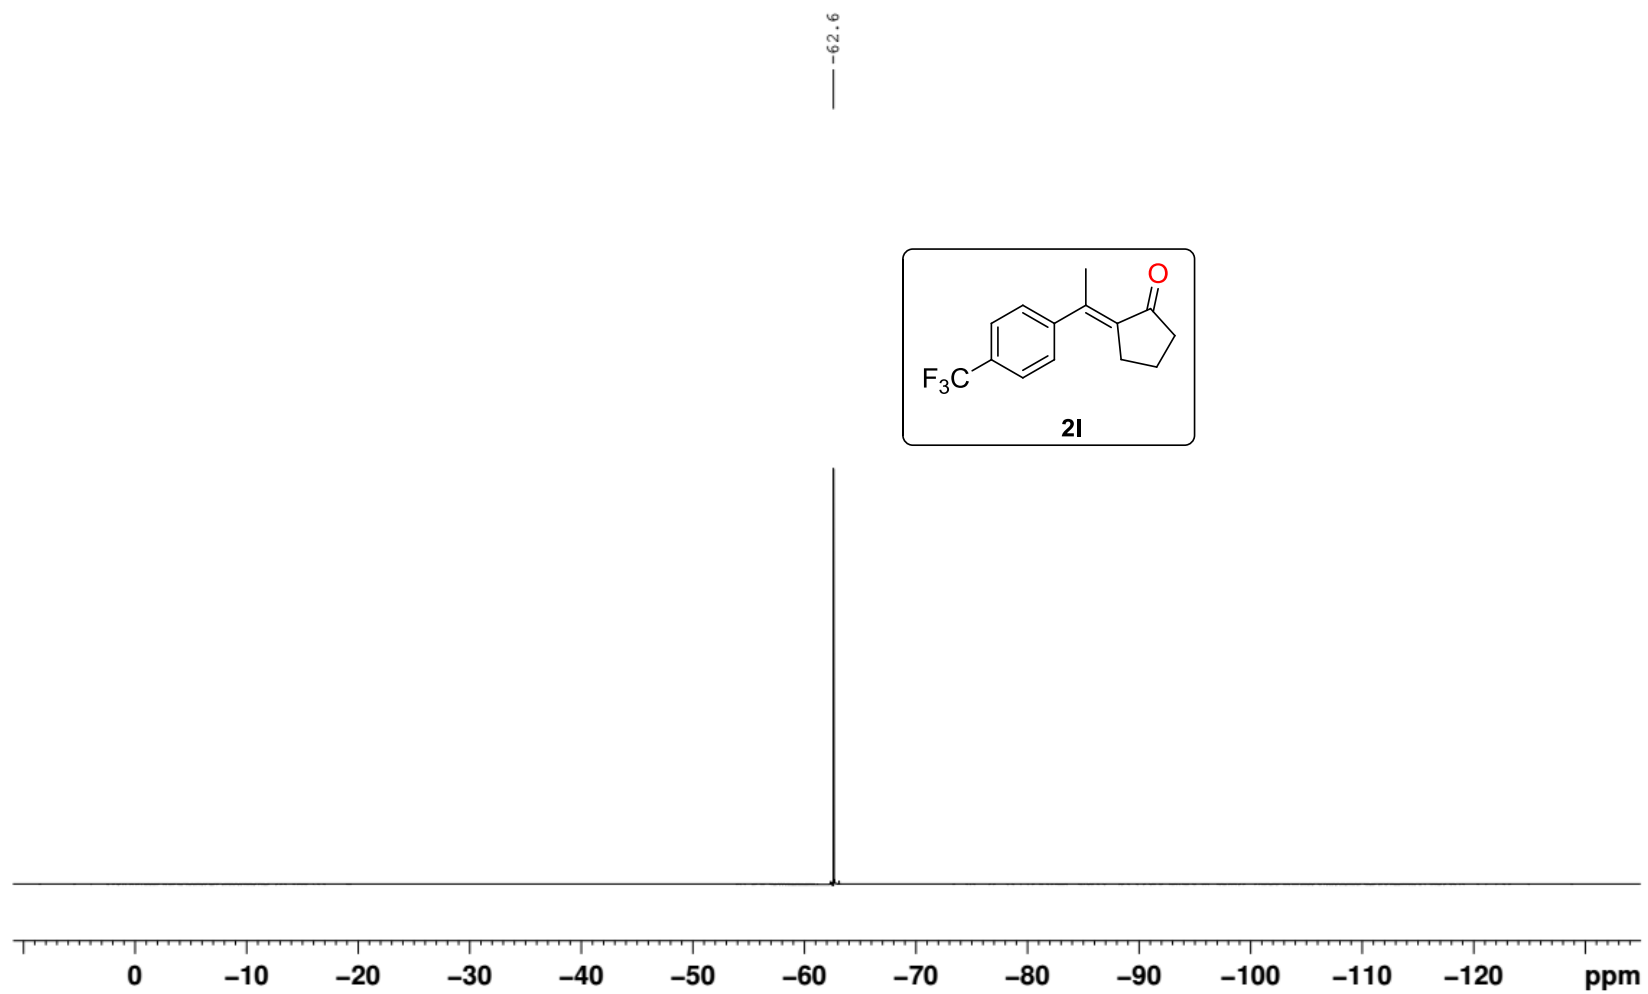

zsc-x180714-2-CDC13-HNMR

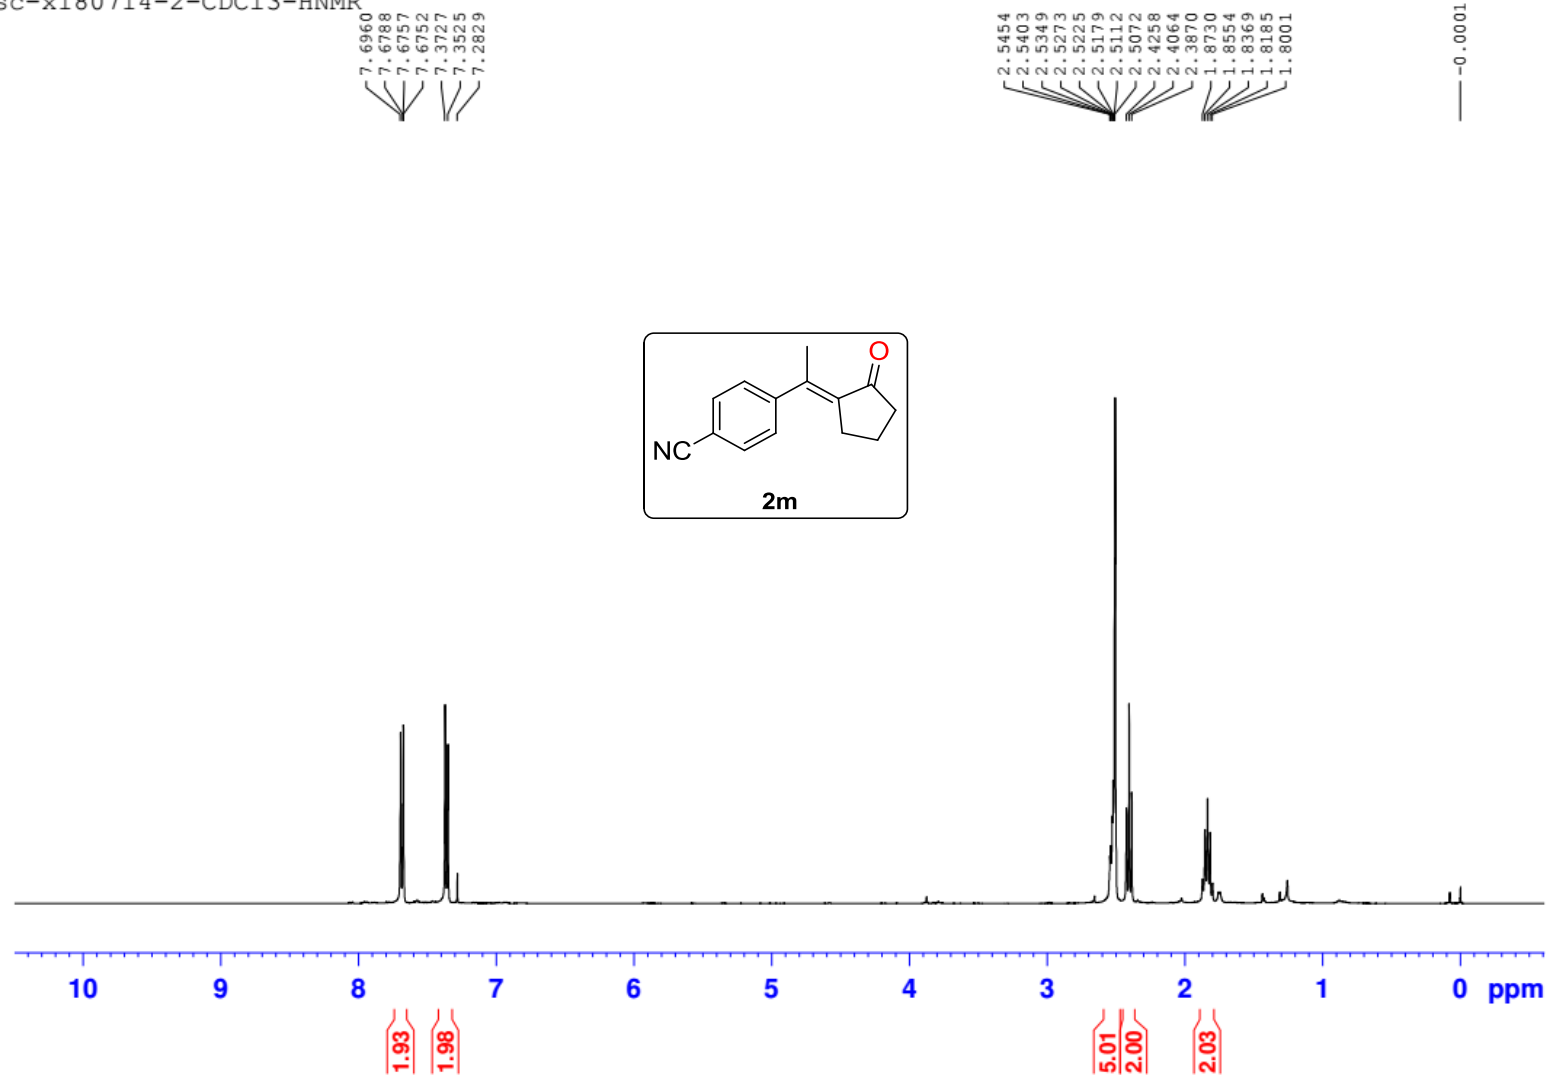

ZSC-X180714-2-CDC13-CNMR

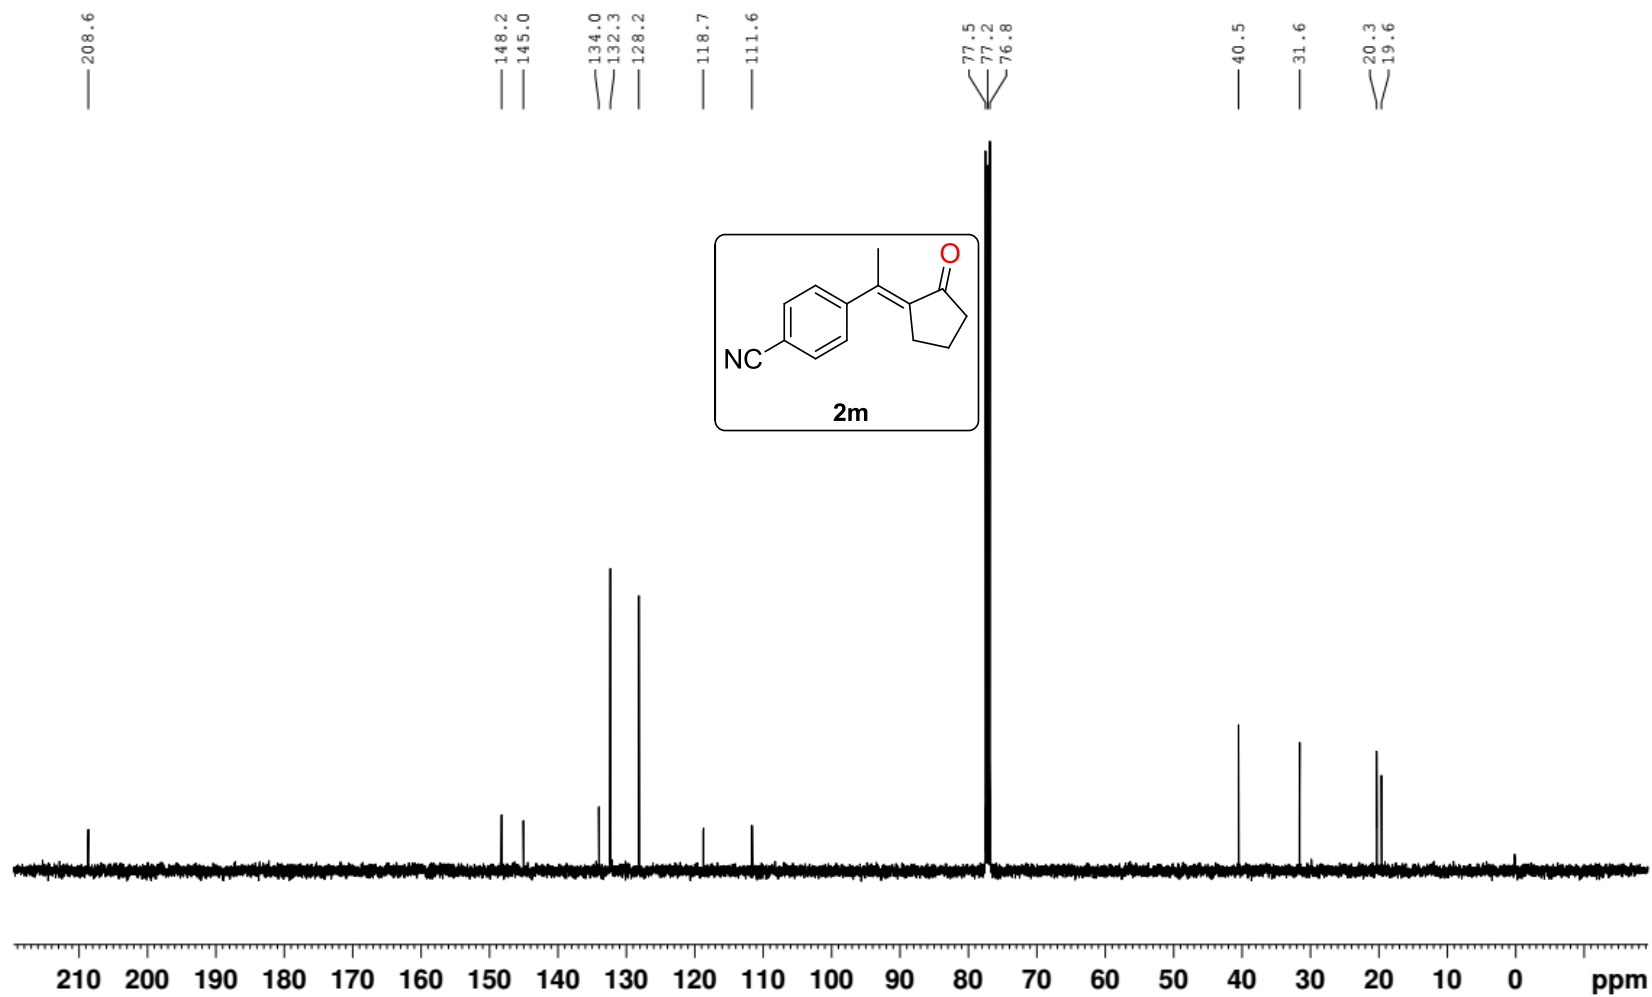

ZSC-X180714-6-CDCL3-HNMR

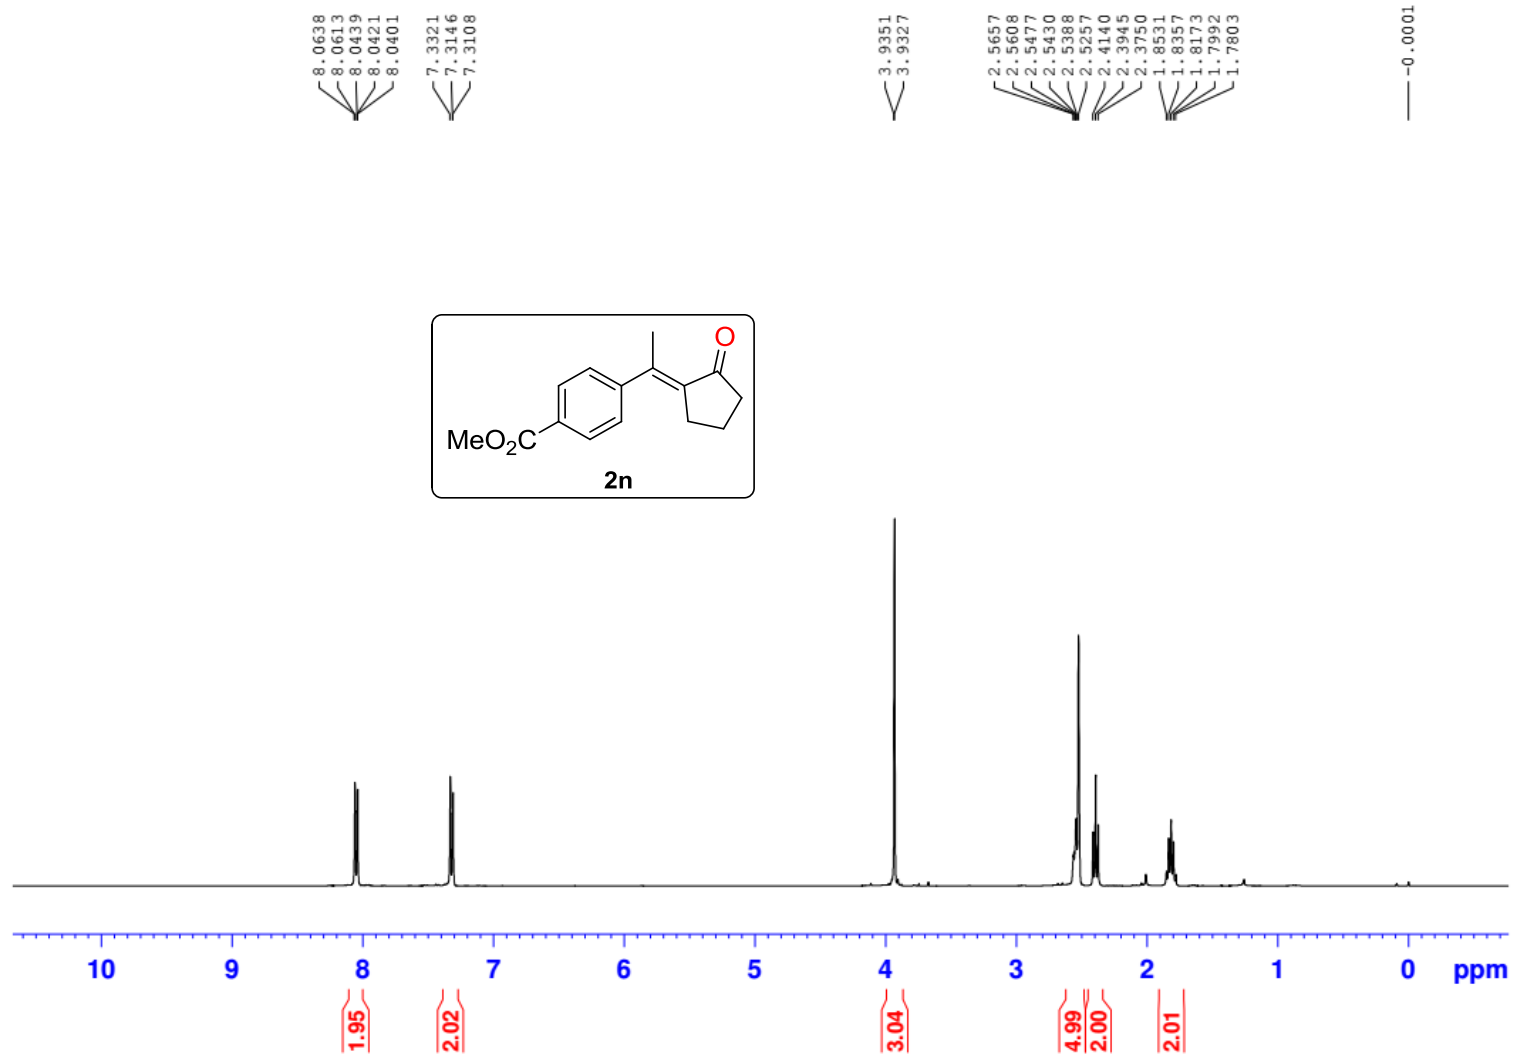



ZSC-X180714-6-CDC13-CNMR

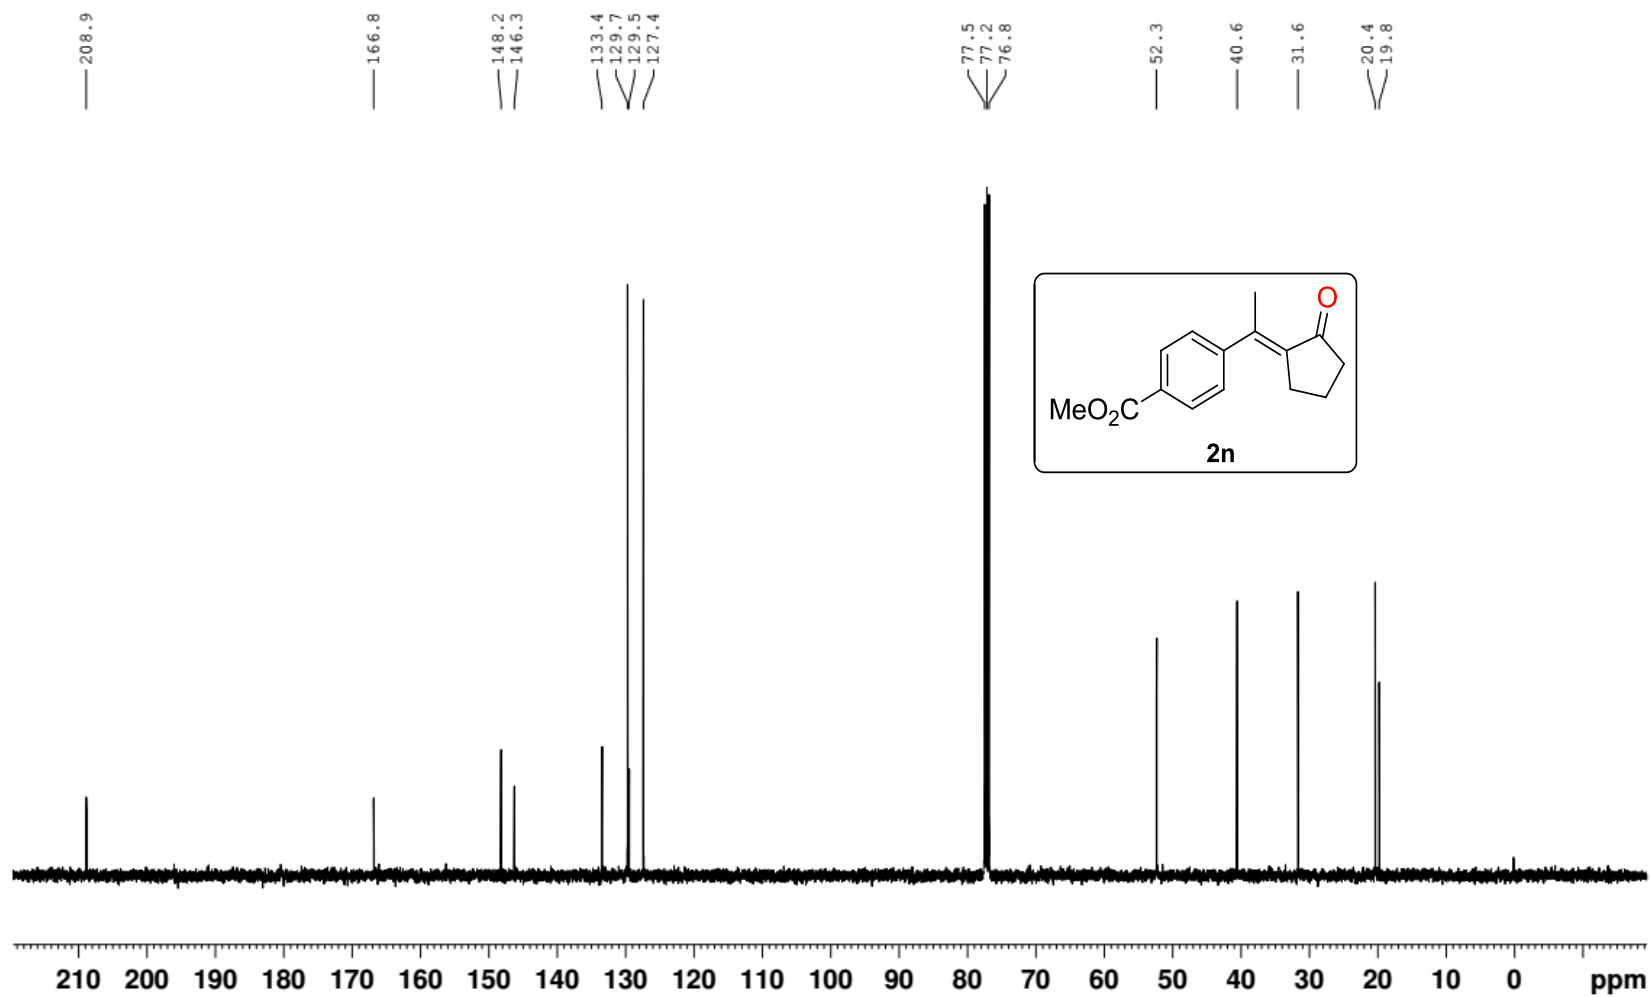

GB-X180308-1-1-2Na-HNMR

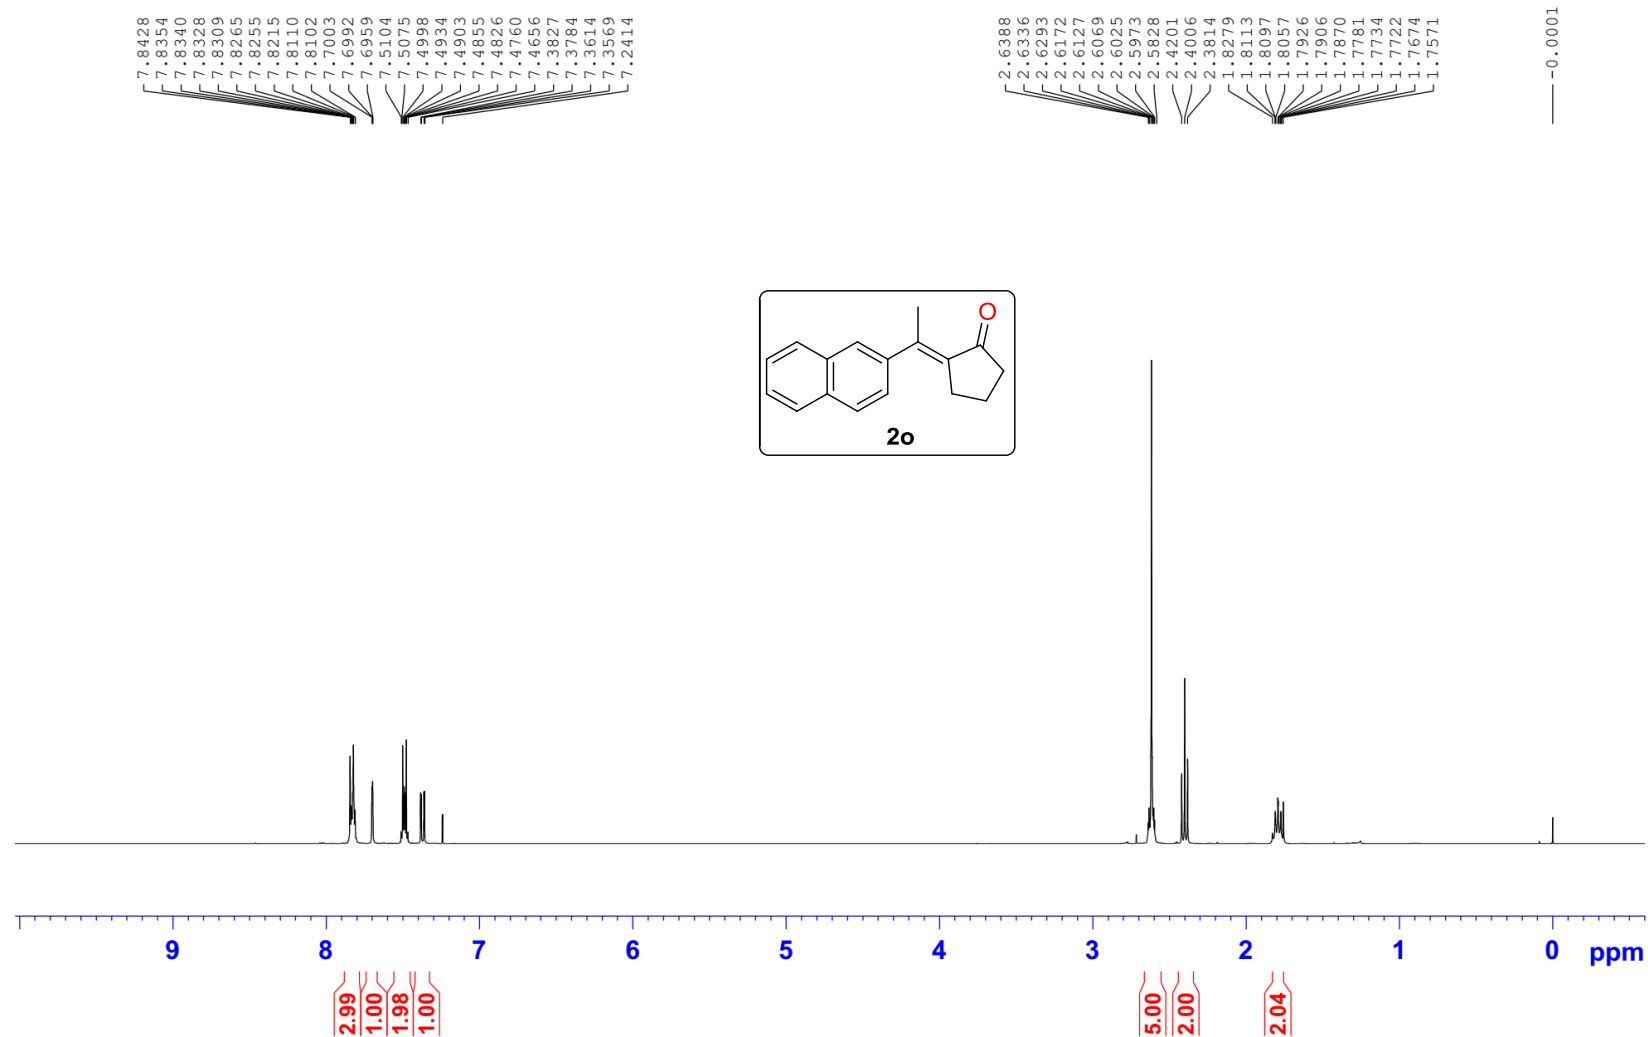

GB-X180308-1-1-2Na-CNMR

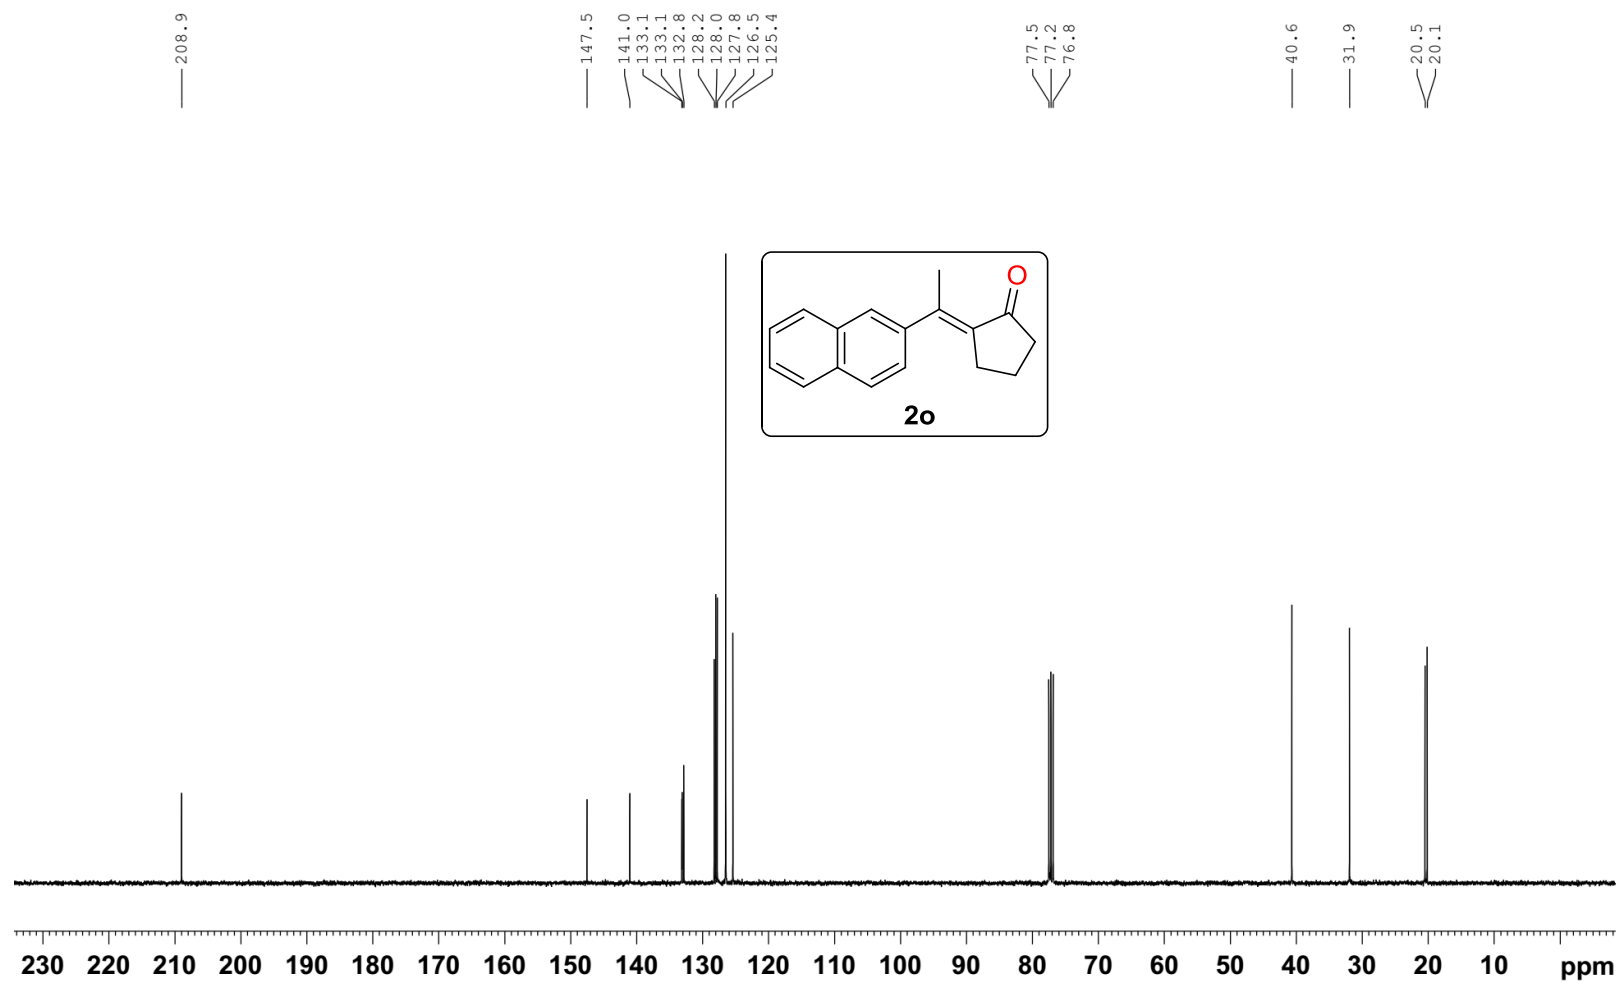

ZSC-X180717-2-CDC13-HNMR

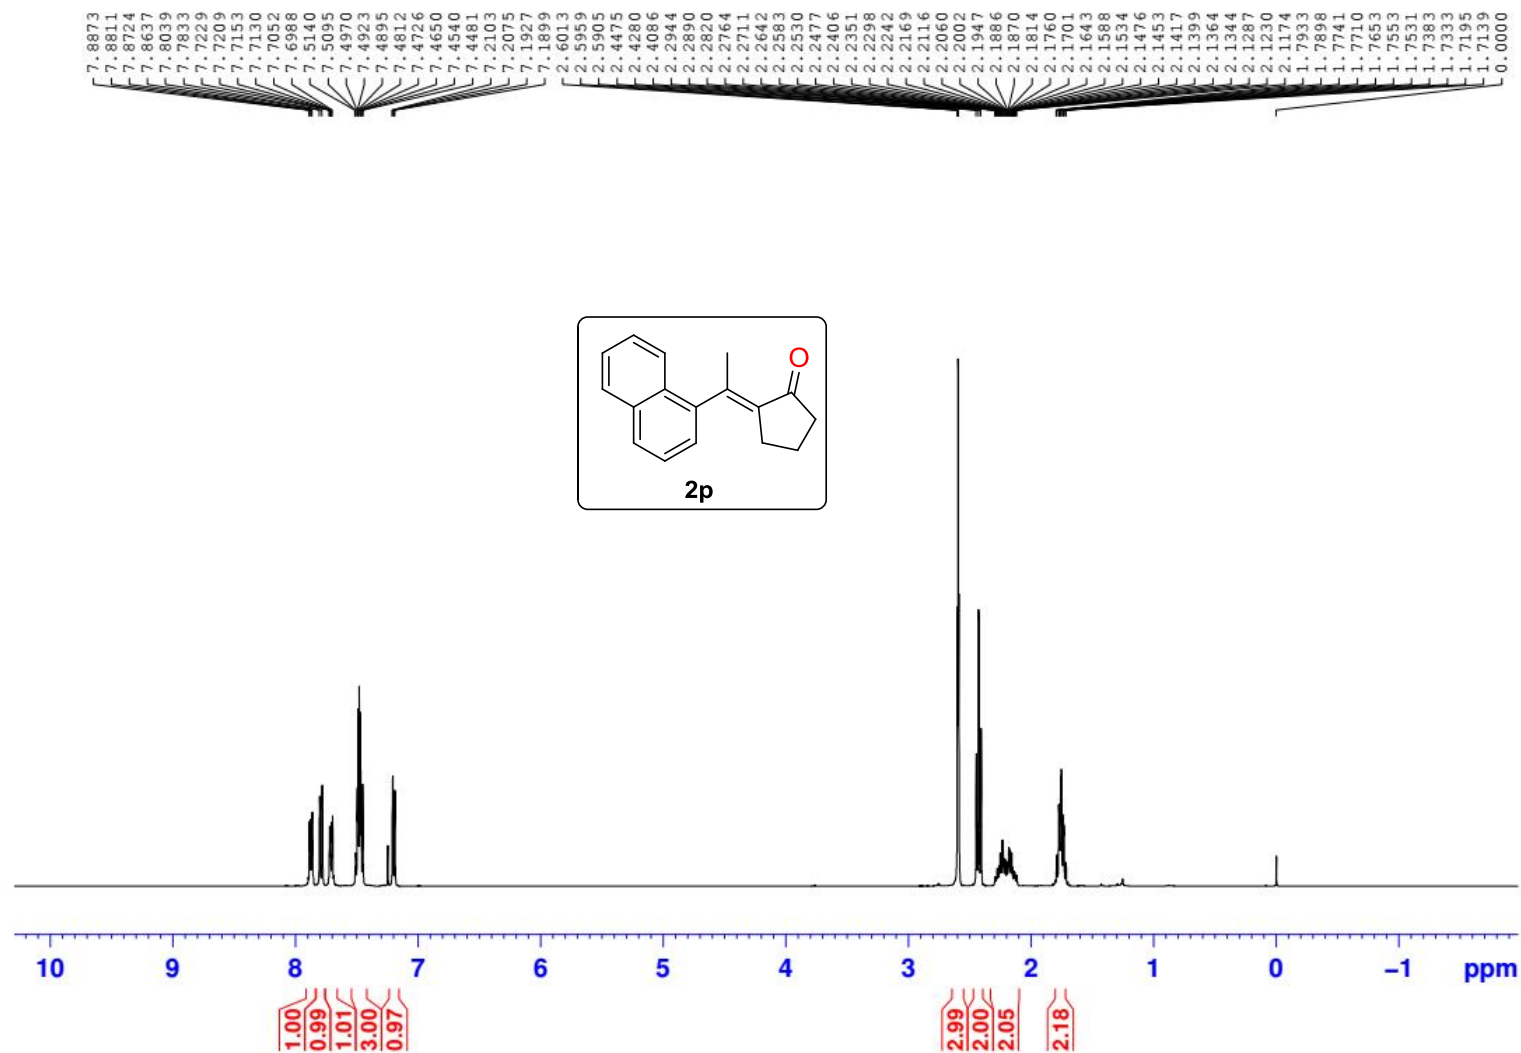

ZSC-X180717-2-CDCl<sub>3</sub>-CNMR

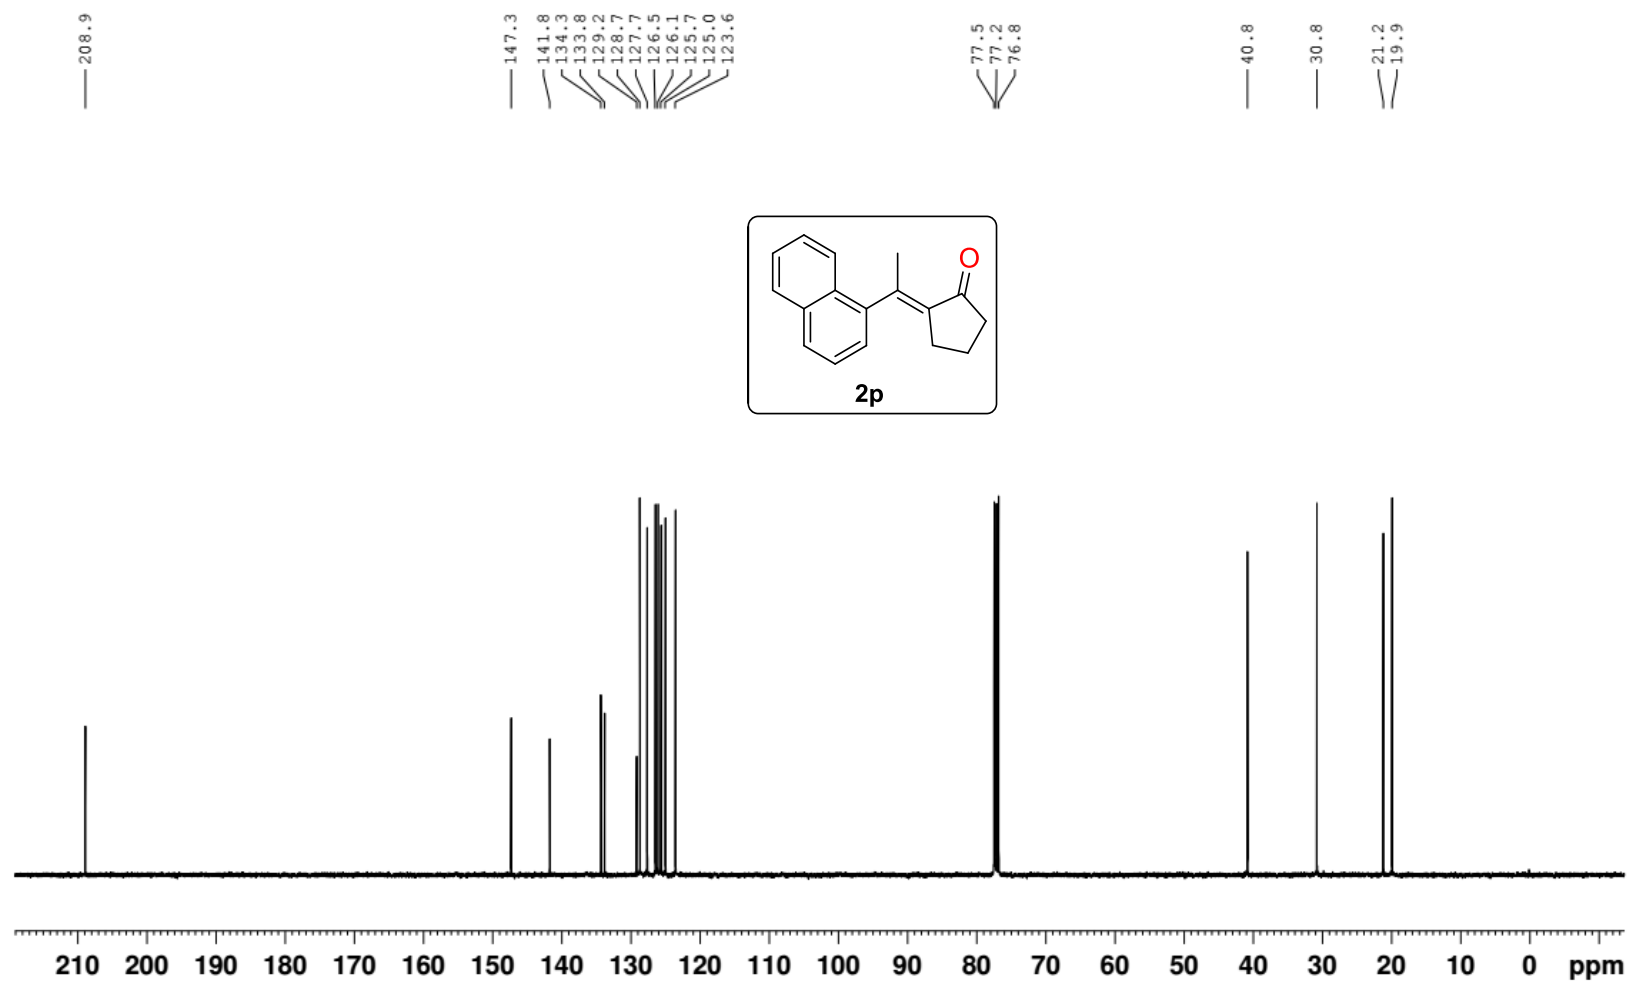

GB-X180614-1-2-MeMe-HNMR

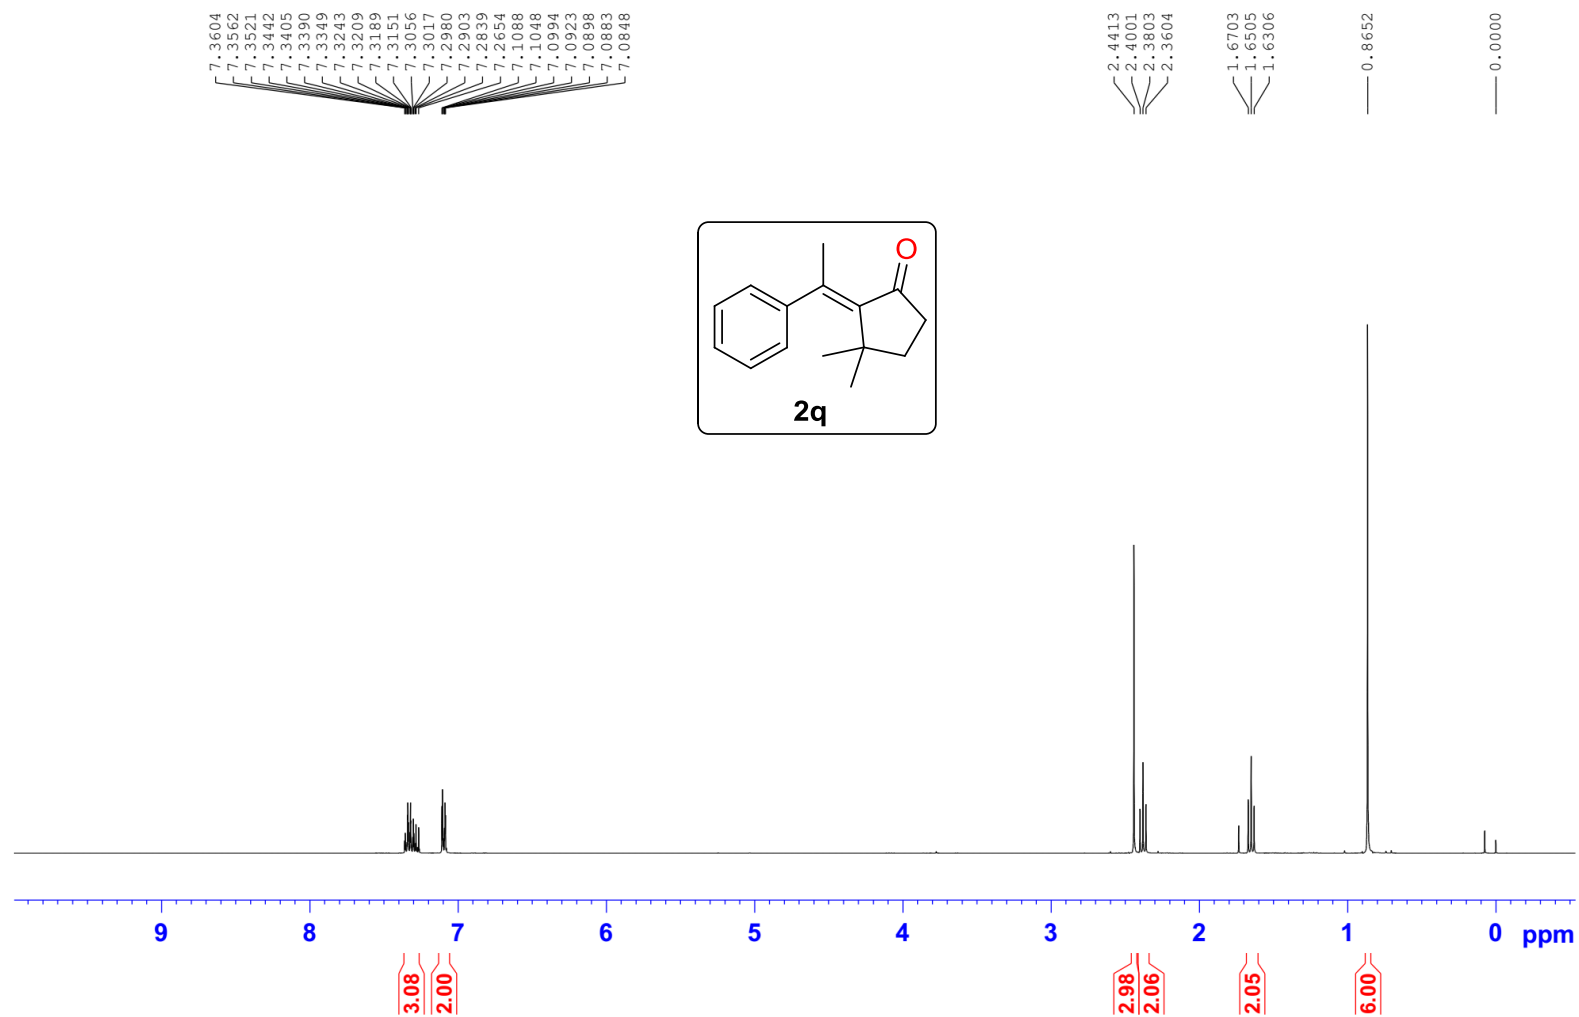

GB-X180614-1-2-MeMe-CNMR

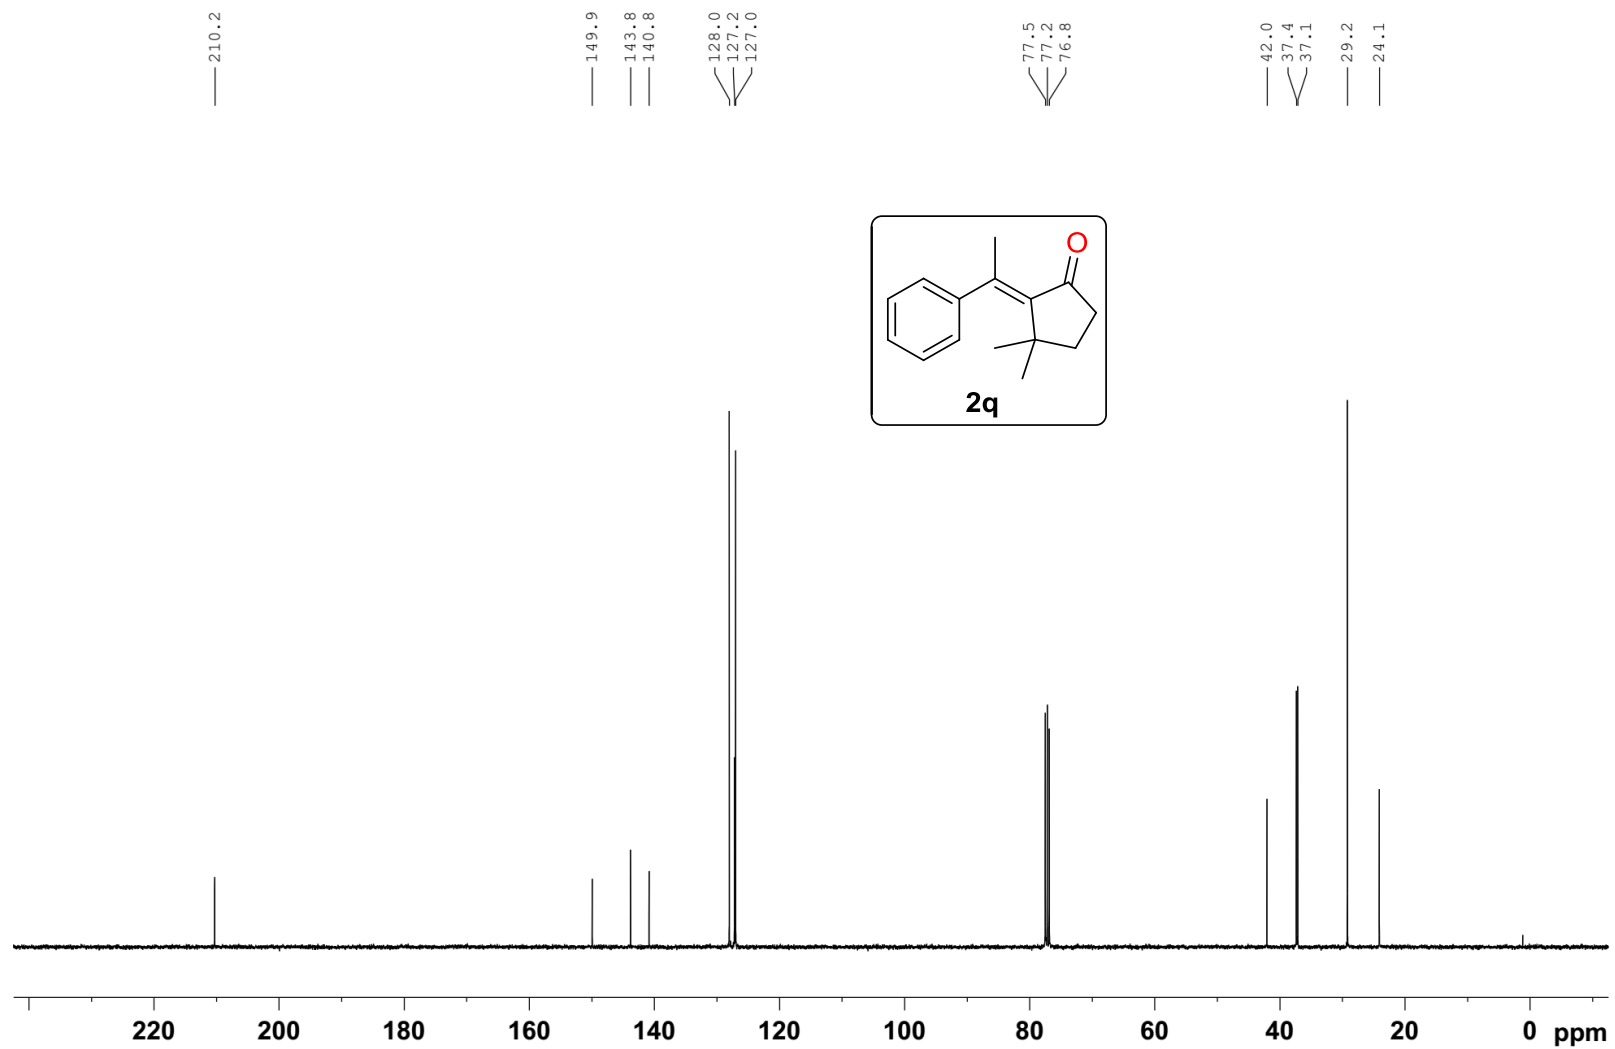

zsc-x180905-2-CDC13-HNMR

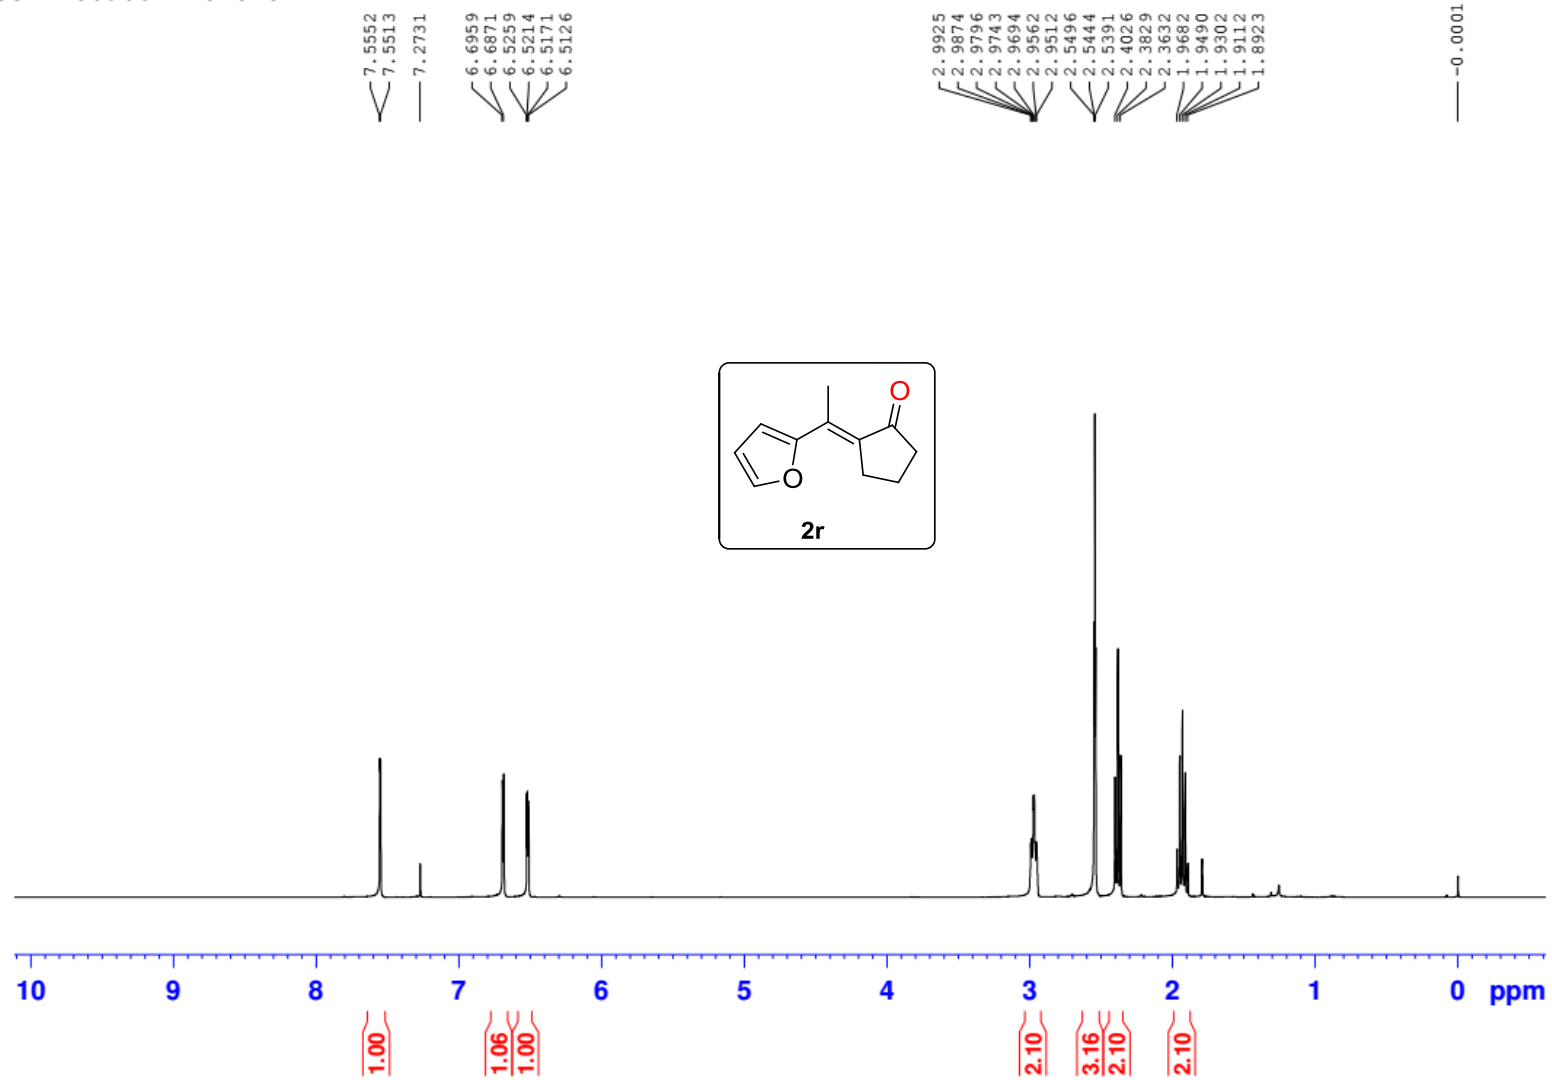



ZSC-X180905-2-CDC13-CNMR

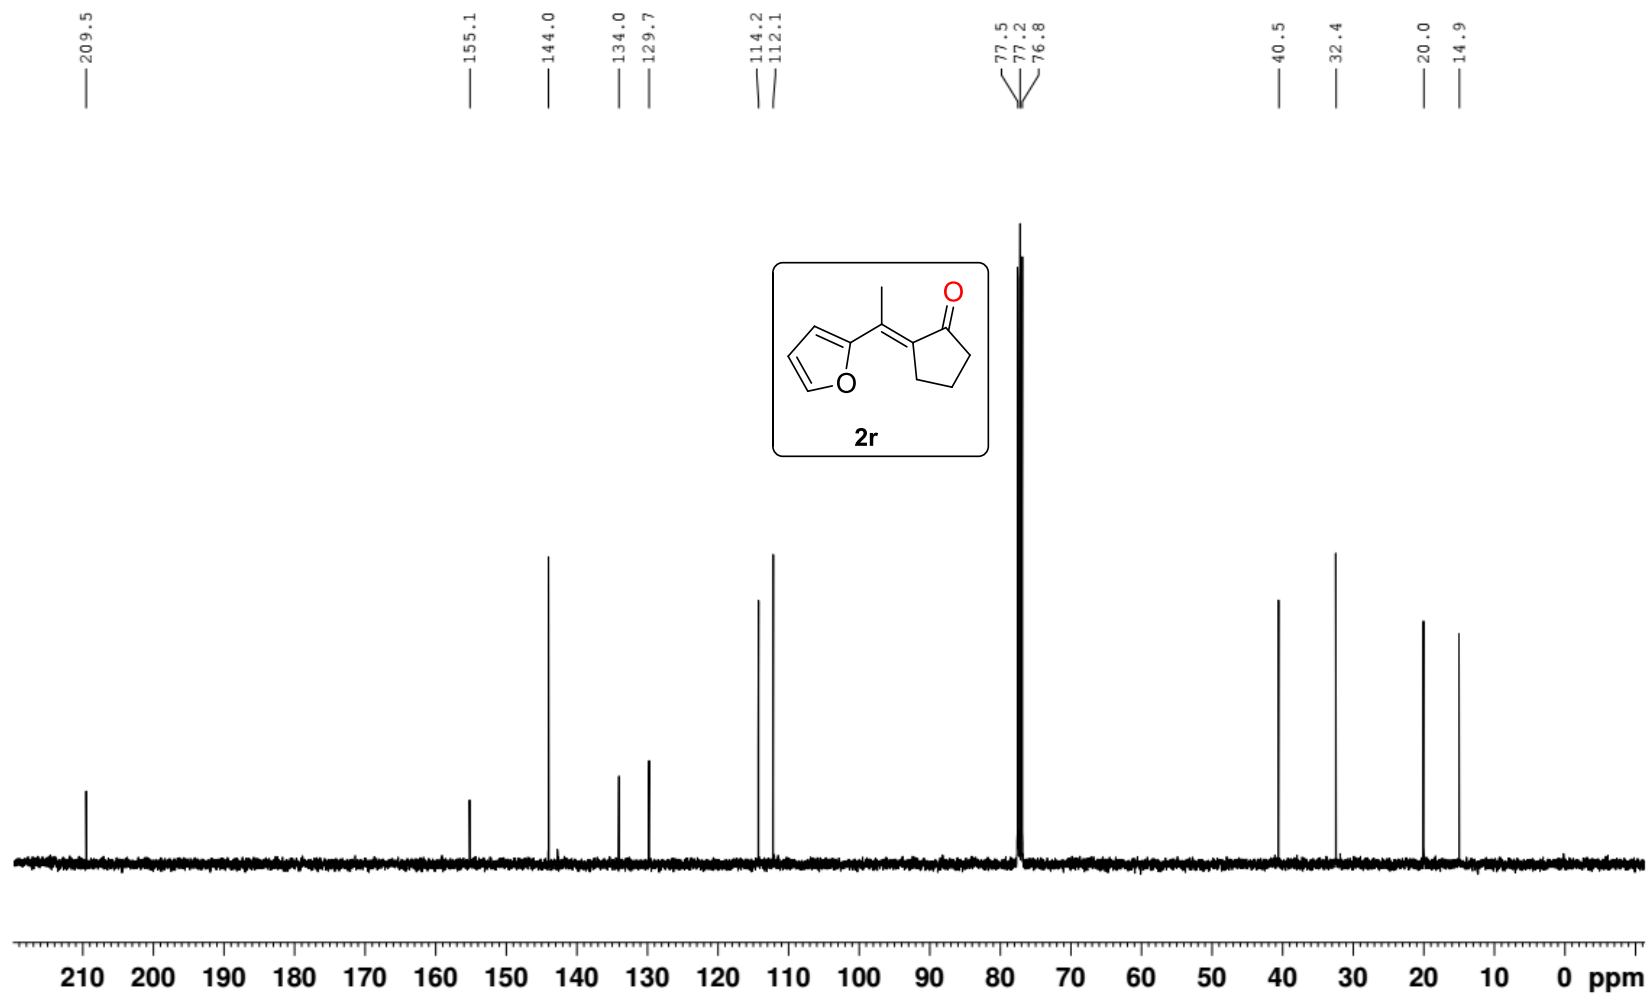

zsc-x180901-3-CDC13-HNMR

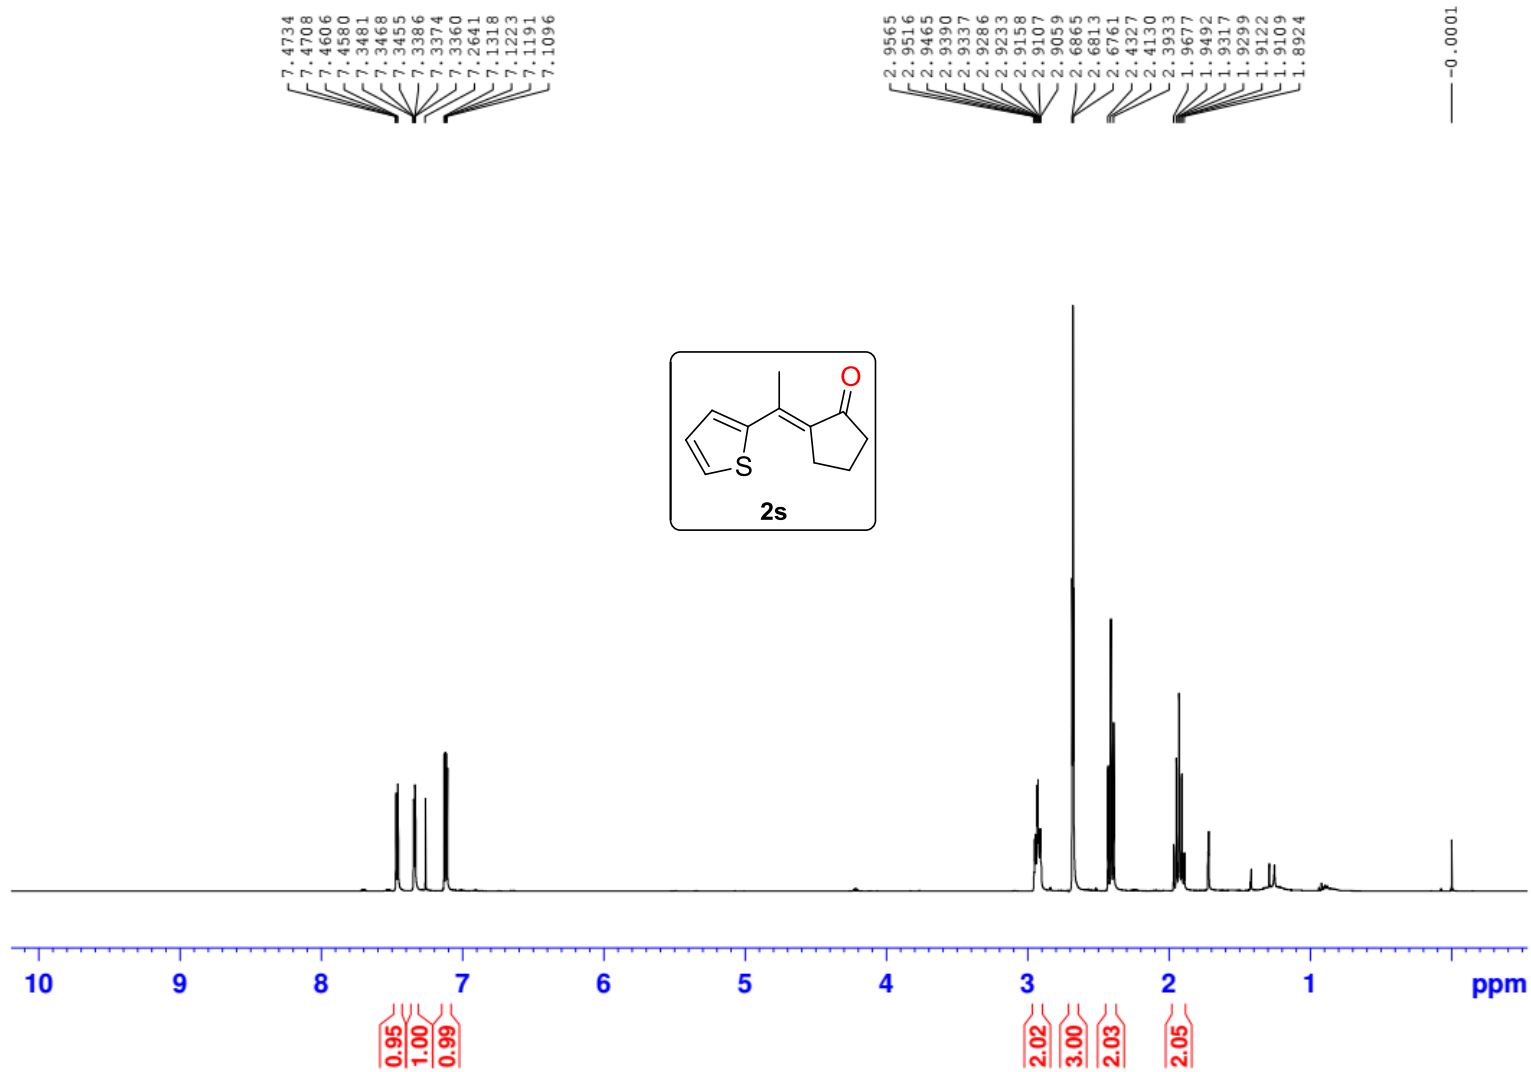

zsc-x180901-3-CDCl<sub>3</sub>-CNMR

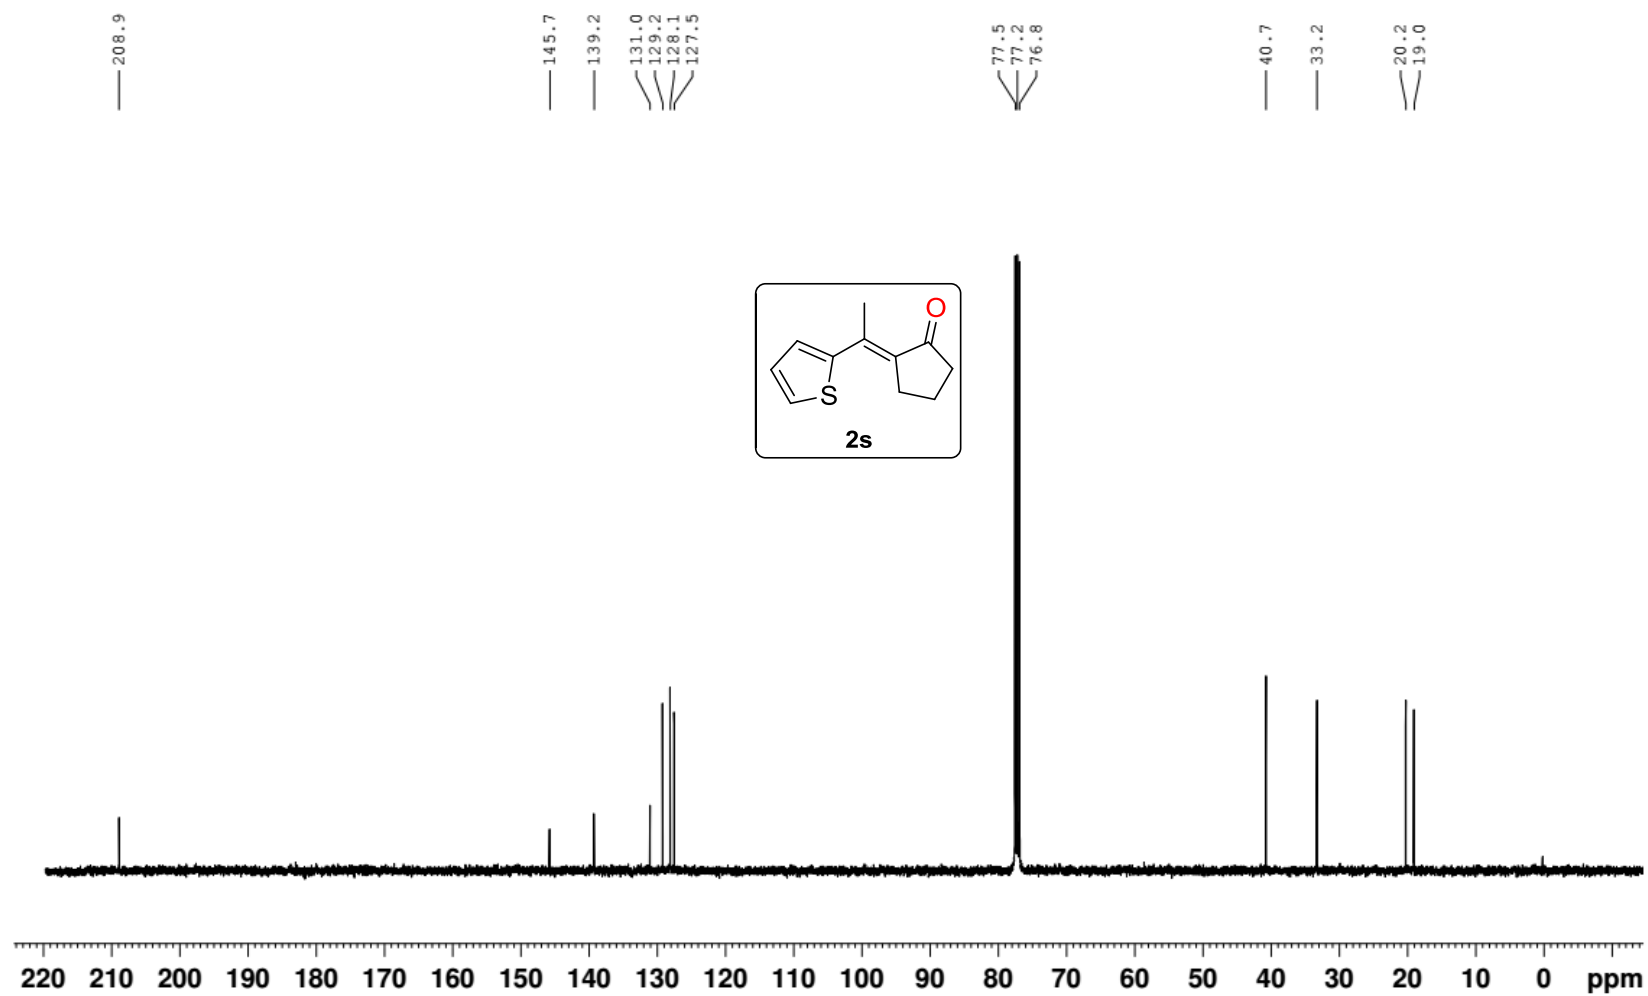

zsc-x18x12-3-CDCl3-HNMR

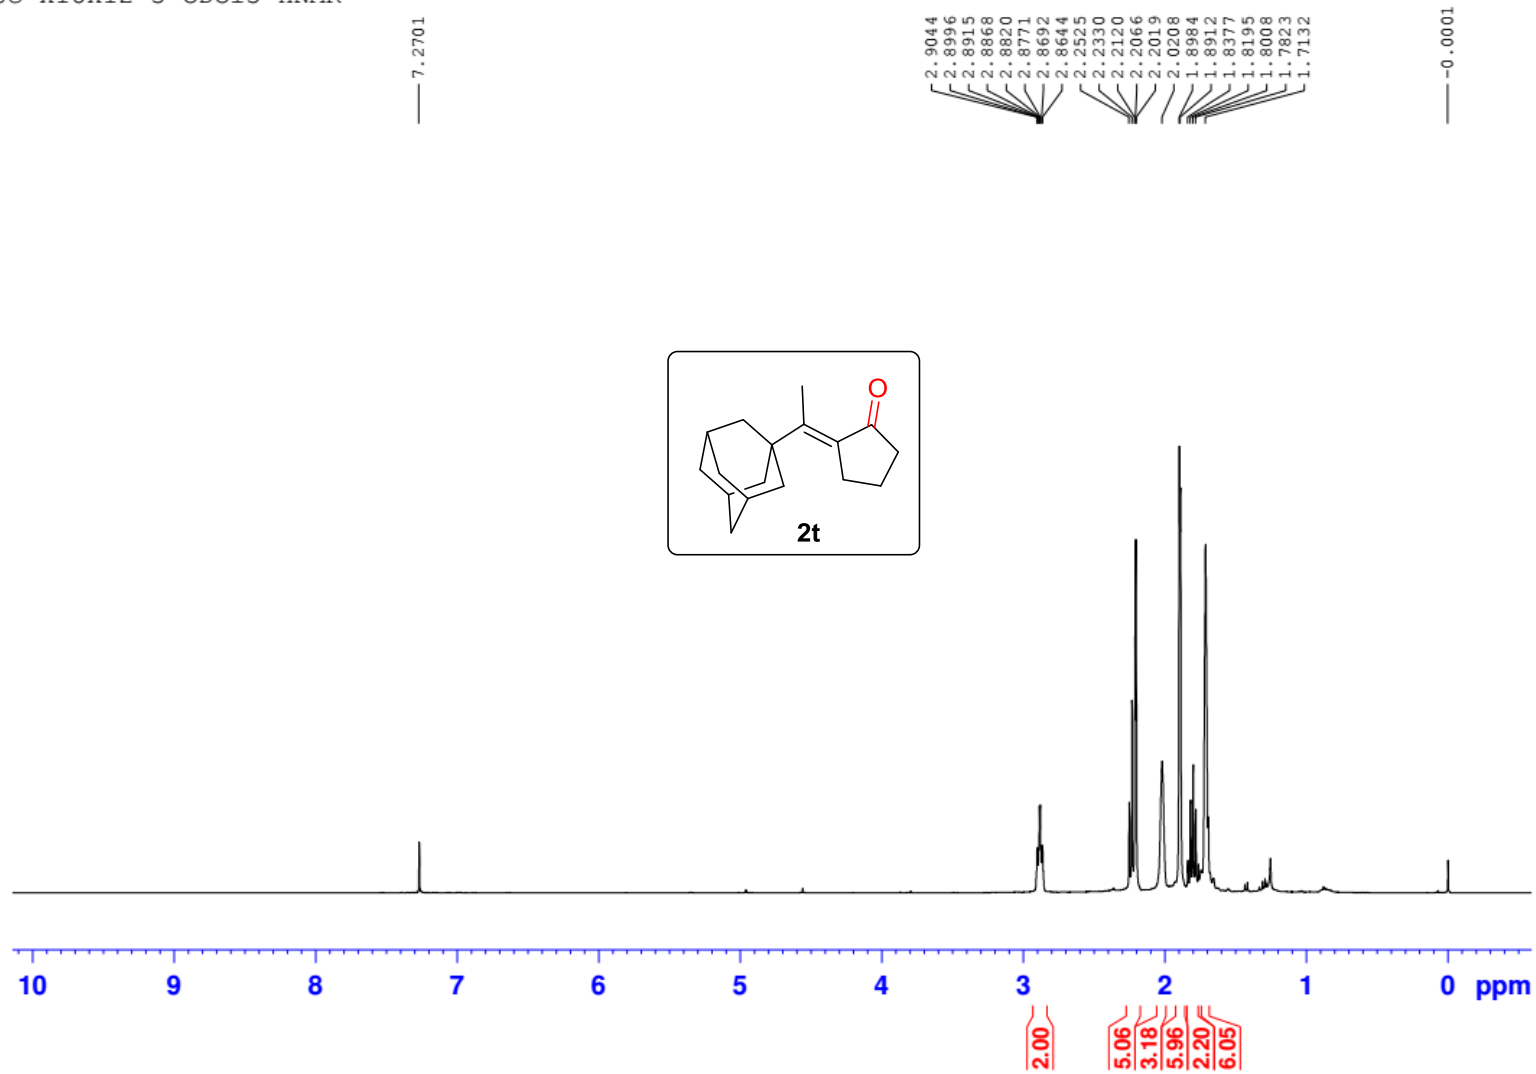

zsc-x18x12-3-CDCl3-CNMR

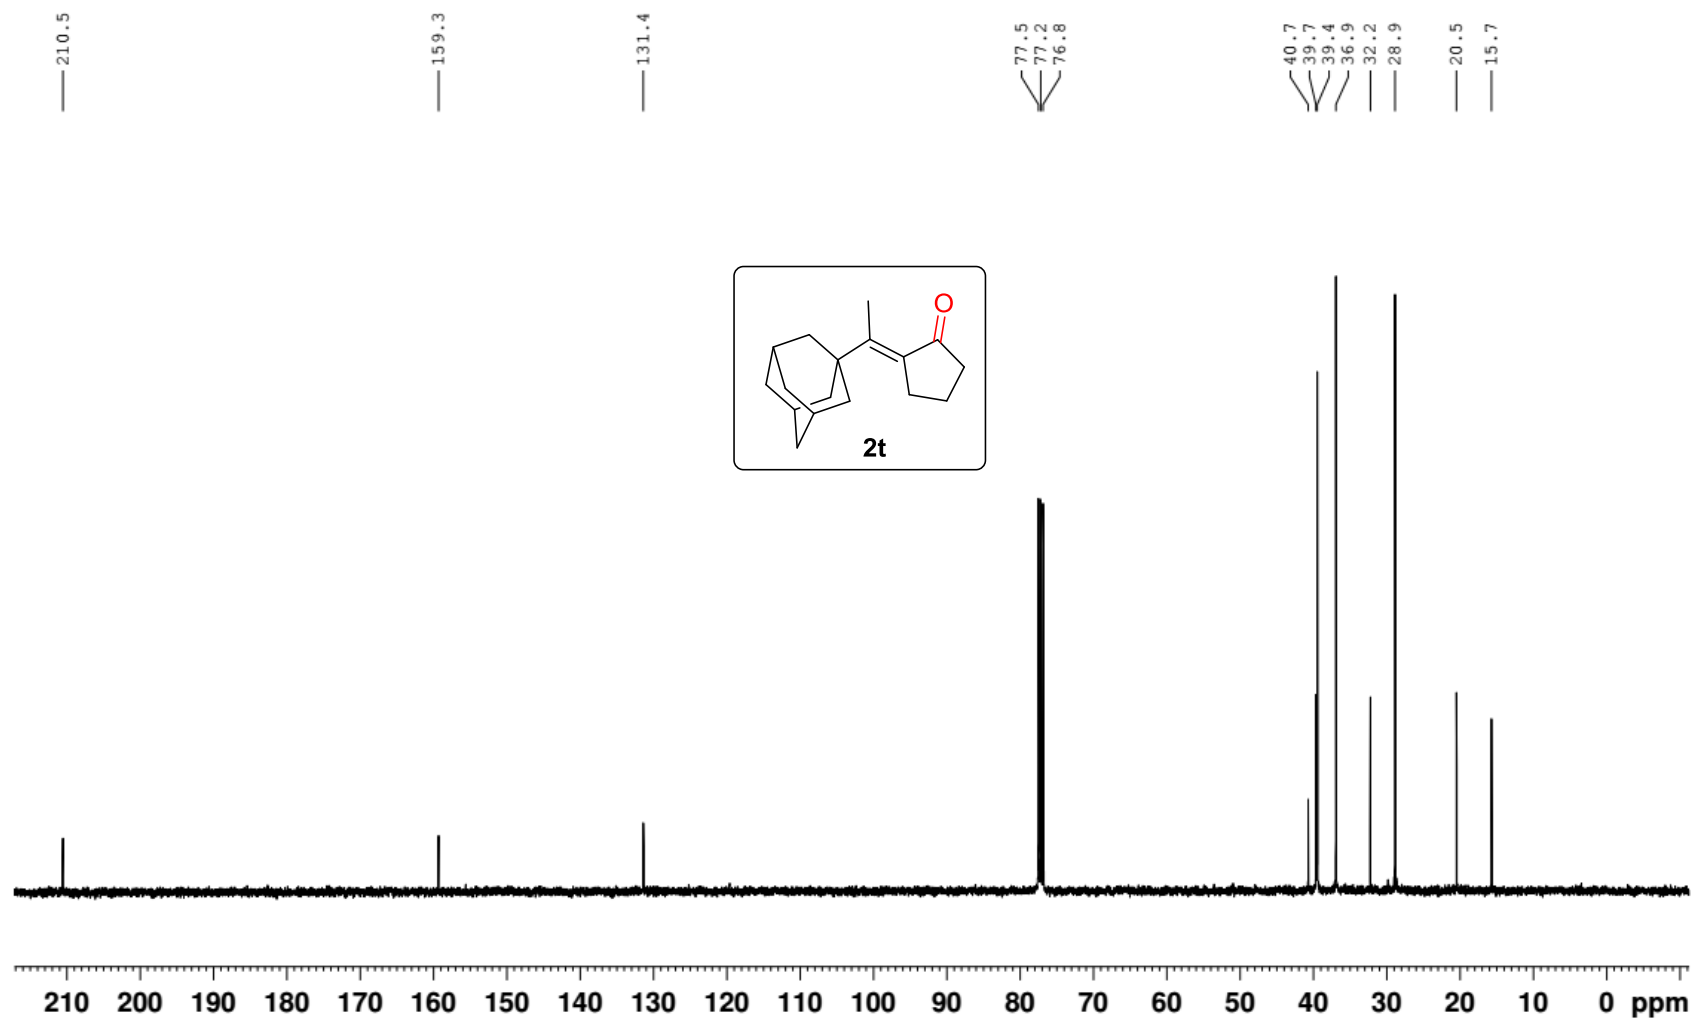

ZSC-X180813-1-CDC13-HNMR

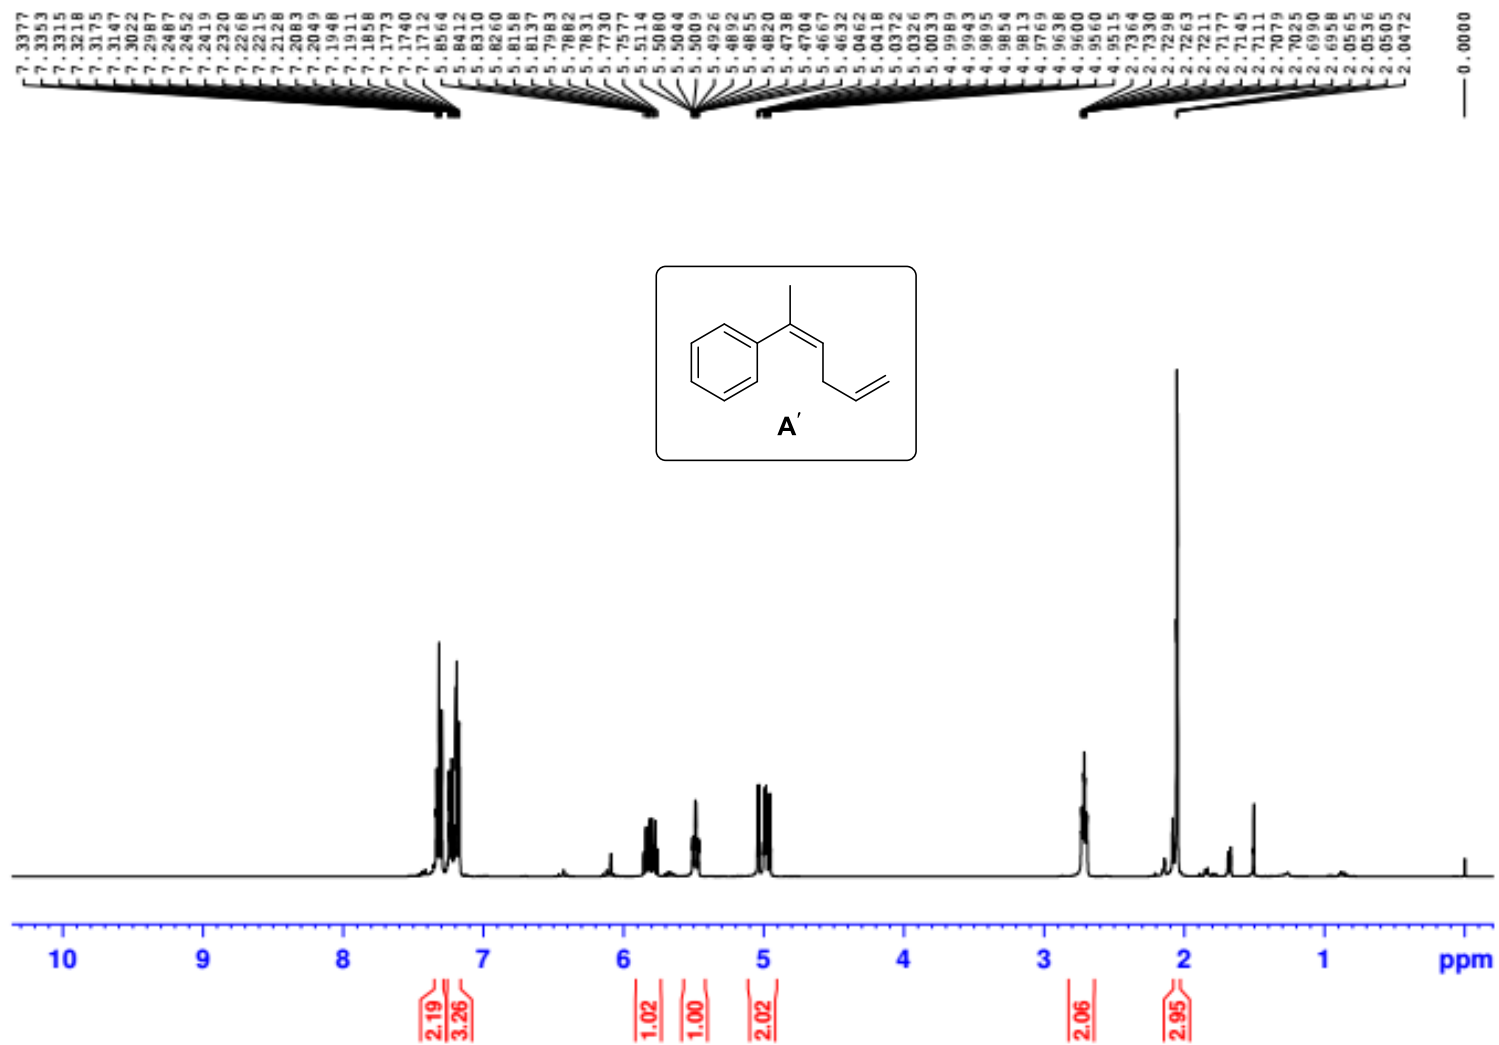

Chemical structure of compound A: CC(=C)CC=Cc1ccccc1

<sup>1</sup>H NMR spectrum (CDCl<sub>3</sub>) of compound A. The x-axis represents the chemical shift in ppm, ranging from 0 to 10. The spectrum shows several peaks, with integration values indicated below the baseline. A list of chemical shifts (δ) is provided above the spectrum.

Chemical shifts (ppm): 7.3969, 7.3929, 7.3881, 7.3783, 7.3745, 7.3729, 7.3676, 7.3142, 7.3095, 7.2960, 7.2926, 7.2801, 7.2760, 7.2717, 7.2319, 7.2287, 7.2258, 7.2157, 7.2104, 7.2057, 7.1928, 7.1857, 5.9297, 5.9142, 5.9045, 5.8988, 5.8889, 5.8716, 5.8616, 5.8560, 5.8462, 5.8307, 5.8260, 5.8175, 5.8143, 5.7992, 5.7959, 5.7810, 5.7776, 5.7741, 5.1195, 5.1149, 5.1105, 5.1062, 5.0764, 5.0721, 5.0677, 5.0634, 5.0327, 5.0286, 5.0247, 5.0209, 5.0074, 5.0034, 4.9994, 4.9955, 2.9716, 2.9554, 2.9394, 2.9379, 2.0354, 2.0336, -0.0001.

Integration values (from left to right): 2.17, 2.26, 1.19, 1.12, 1.03, 2.20, 2.00, 2.88.
